# Supplementary material for: A Weighted and Directed Interareal Connectivity Matrix for Macaque Cerebral Cortex
Source: PubMed Central journal article supplement — Cereb Cortex. 2012 Sep 25;24(1):17–36. doi: 10.1093/cercor/bhs270 (PMC3862262; doi:10.1093/cercor/bhs270), 2012-09-25
Supplement: supp_bhs270_bhs270supp_data.pdf [file supp_bhs270_bhs270supp_data.pdf]

## Supplementary Data

### **A weighted and directed interareal connectivity matrix for macaque cerebral cortex**

N. T. Markov, M. M. Ercsey-Ravasz, A. R. Ribeiro Gomes, C. Lamy, L. Magrou, J. Vezoli, P. Misery, A. Falchier, R. Quilodran, M. A. Gariel, J. Sallet, R. Gamanut, C. Huissoud, S. Clavagnier, P. Giroud, D. Sappey-Marinier, P. Barone, C. Dehay, Z. Toroczkai, K. Knoblauch, D. C. Van Essen, H. Kennedy

#### **TABLE OF CONTENT**

|                                                                                                                                  |           |
|----------------------------------------------------------------------------------------------------------------------------------|-----------|
| <b>1) SUPPLEMENTARY MATERIALS AND METHODS .....</b>                                                                              | <b>2</b>  |
| <b>2) SUPPLEMENTARY TABLES.....</b>                                                                                              | <b>7</b>  |
| TABLE S1. NEWFOUND PROJECTIONS AND BIBLIOGRAPHICAL REFERENCES TO KNOWN PROJECTIONS. ....                                         | 7         |
| TABLE S2. ANIMAL CASES AND PROCEDURES .....                                                                                      | 10        |
| TABLE S3. ESTIMATED PROBABILITY OF OCCURRENCE OF SPARSE PROJECTIONS FOLLOWING REPEAT INJECTIONS IN AREAS V1, V2, V4 AND 10 ..... | 11        |
| TABLE S4. ASYMMETRICAL BIDIRECTIONAL, SYMMETRICAL BIDIRECTIONAL AND UNIDIRECTIONAL CONNECTIONS. ....                             | 13        |
| TABLE S5. DOMINATING SETS.....                                                                                                   | 16        |
| TABLE S6. FLNE VALUES AND BIBLIOGRAPHIC ANALYSIS .....                                                                           | 17        |
| TABLE S7. STEREOTAXIC COORDINATES OF INJECTION SITES IN THE F99 ATLAS .....                                                      | 62        |
| <b>3) REFERENCES FOR TABLES S1 AND S6 .....</b>                                                                                  | <b>63</b> |
| <b>4) SUPPLEMENTARY FIGURES.....</b>                                                                                             | <b>66</b> |
| FIGURE S1 - LOCATIONS OF 39 INJECTION SITES REPRESENTED ON THE F99 ATLAS SURFACE .....                                           | 66        |
| FIGURE S2 - CHARTS OF LABELED NEURONS .....                                                                                      | 67        |
| FIGURE S3 - RELATIONSHIPS OF MEANS FROM MULTIPLE INJECTIONS TO THE 95 CONFIDENCE INTERVALS FOLLOWING SINGLE INJECTIONS. ....     | 106       |
| FIGURE S4 - CONNECTIVITY PROFILES TO 23 TARGET AREA .....                                                                        | 109       |
| FIGURE S5 - COMPARISON OF THE CONSISTENCY OF NEWFOUND PROJECTIONS (NFP) AND KNOWN PROJECTIONS. ....                              | 115       |
| FIGURE S6 - INJECTION SITES IN 29 INJECTIONS .....                                                                               | 116       |
| FIGURE S7 - ATLAS .....                                                                                                          | 125       |

## 1) Supplementary materials and methods

**Surgery and histology.** Surgical and histology procedures were in accordance with European requirements 86/609/EEC and were approved by the appropriate veterinary and ethical authorities. A detailed description of the injection, surgical and histological procedures are given elsewhere (Barone et al. 2000; Markov et al. 2011). Experiments were carried out in cynomolgus (*Macaca fascicularis*) and one rhesus macaque monkey. A total of 39 injections were performed in 28 monkeys (**Table S2**). Data from the V1, V2 and V4 injections were partially reported in a previous study (Markov et al. 2011).

Following premedication with atropine (1.25 mg, i.m.) and dexamethasone (4 mg, i.m.), monkeys were prepared for surgery under ketamine hydrochloride (20 mg/kg, i.m.) and chlorpromazine (2 mg/kg, i.m.). Anesthesia was continued with halothane or isoflurane in N<sub>2</sub>O/O<sub>2</sub> (70/30). Single injections of Diamidino Yellow (DY) and Fast Blue (FsB) (0.1-0.6 micro liters) were made using Hamilton syringes. Stereotypic elongated injections (2 to 4mm) were made in the cortical gray matter at a shallow angle to the cortical surface; tracer was delivered at regular intervals as the needle was retracted thereby aiming to leave a bolus of tracer in the cortex. Injection sites are shown in **Figures S1 and S6**. Injection of areas in non-exposed cortical regions was aided by an image-guided stereotaxic system (Brainsight® Frameless, Rogue Research Inc.) (Frey et al. 2004). The target area was identified on MRI 1.5-Tesla scans. Visualization of sulcal landmarks in a 3D reconstruction of the monkey brain and in selected planes allowed control and optimization of the trajectory for injection. Prior to an MRI scan, the monkey was fitted with bone implanted fiducial markers. During the tracer injection procedure, the Brainsight® system matched online the positions of the fiducial markers with the MRI image thereby estimating the trajectory of the injection needle with respect to a designated target site.

After a survival period of 11-13 days, animals were deeply anesthetized before being perfused with 4-8% paraformaldehyde / 0.05% glutaraldehyde in phosphate buffer (0.1 M, pH=7.4). Cryoprotection was ensured by sucrose (Kennedy and Bullier 1985) or glycerol perfusion gradients (Rosene et al. 1986). Brains were removed, kept in the cryoprotecting liquid overnight or until sinking. Horizontal or coronal 40µm thick sections were cut on a freezing microtome (**Table S2**). Sections at regular intervals were reacted for cytochrome oxidase and acetylcholinesterase activity (Barone et al. 2000) and sternberger monoclonals incorporated-32 (SMI-32) (Hof and Morrison 1995). Every third section was mounted on gelatinized glass slides and used to explore projection pathways.

**Charting labeled neurons and 3D reconstruction of injection sites.** We refer to the injected area as the target area and the areas containing labeled neurons as the source areas. The restricted region of the source area containing the labeled cells is the projection zone (Barone et al. 2000). The uptake zone of the dye corresponds to the zone of dense extracellular label immediately surrounding the needle tract and in some cases containing necrotic cells (see supplementary information in (Markov et al. 2011) for a detailed consideration of the uptake zone). Injection sites and their relationship to areal borders and underlying white matter are shown in line drawing of multiple sections through each injection site (**Figure S6**). 3D reconstructions of the 4 injection sites in area 10 from the stack of sections containing the injection site were generated using the Module Map3D program in ExploraNova®

Sections were analyzed without coverslipping using an oil-immersion objective and a magnification of 200-250 under ultraviolet light with a Leica fluorescent microscope equipped with a D-filter set (355-425 nm). Retrogradely labeled neurons were identified using standard criteria (Keizer et al. 1983) to distinguish FsB (blue label mainly in cytoplasm) and DY (yellow label mainly in nucleus). Some earlier studies presumably missed connections due to inspection not spanning the entire hemisphere. Here we examined connectivity throughout the whole hemisphere that was injected. Of the 1 in 3 sections retained for charting neurons, typically 1 in 2, were systematically examined to identify the areas containing labeled neurons (**Table S2**).

**Sampling procedures.** For 4 injections, charts were made on a X-Y plotting table electronically coupled to the microscope stage (**Table S2**). This generated maps of labeled neurons on large sheets of paper that were matched to projections of the subsequently stained section so as to



locate cortical layers and landmarks. These 4 brains and all the remaining brains were subsequently investigated using the superior Mercator® software package running on ExploraNova® technology (**Table S2**). This much-improved system stores digitized charts of whole brain sections with accurate counts and coordinates of all labeled neurons, making it possible to view charted sections at different magnifications.

The complexity of cortical folds and the spatial heterogeneity of labeling in source areas necessitates a controlled sampling and counting of neurons at closely spaced intervals throughout the projection zone of each area containing labeled neurons. Histograms of the number of labeled neurons per section (density profiles) were generated (see methods as well as Figure S1 in Markov et al., 2011). Inspection of the density profiles was made so as to ensure that sampling frequency was adequate. When sufficient numbers of sections have been employed the contours of the density profile are smooth (Batardiere et al. 1998; Vezoli et al. 2004). For sparse connections all sections retained for charting neurons were explored, whereas the sampling frequency was as low as 1/4 for strong projections. Thus, the spacing between sections used for cell counting was between 0.12 and 0.48 mm. Neuronal counts were adjusted to reflect 1/1 (0.12 mm spacing) for all projections, thereby compensating for sampling nonuniformities. In the Results section of the paper, when frequency of examination is mentioned it is with respect to the sections retained and not the total number of sections. Likewise, when the number of interpolated neurons are mentioned it refers to the number of neurons estimated for the 1 in 3 sections that were retained for plotting and would therefore be predicted to be approximately 1/3 of the total labeled neurons in the hemisphere. A detailed record of the areas and sampling rates allowed accurate book-keeping for areas of different weights. The weight values (FLNe see definition below) for all pathways are reported in **Table S6** along with relevant citations. The scale bars in the figures represent distances measured in the processed sections, without correction for tissue shrinkage.

For a conventional stereological analysis, a ‘guard zone’ at the top and bottom of the section would be used to exclude cells that were only partially contained within the section. Because our analysis is based on ratios of labeled neurons, not on absolute numbers, the potential gain would be very minor in relation to the observed variance and uncertainty of connection strengths, We elected not to do this, especially because the need to focus carefully on every labeled neuron throughout every section would have added an impractical burden in terms of the time needed to score each section.

**Parcellation of the M132 cortical atlas.** The majority of brains were sectioned in the coronal plane. So as to align the plane of section to that used in our atlas, a 7T MRI scan was made of the M132 brain that was used to create the atlas. ITK-SNAP software <http://www.itksnap.org> makes it possible to shade a region of interest in a given plane and view this region in an alternative plane. This proved to be extremely powerful for identifying areas in horizontal and parasagittal planes with respect to the M132 atlas as well as for compensating for small deviations from the optimal coronal plane of section.

Localization of injection sites and labeled neurons was based on a new reference atlas that includes 91 cortical areas mapped to the left hemisphere of case M132. The cortical parcellation was based on a combination of histological criteria (Markov et al. 2011) and atlas-based landmarks (Paxinos et al. 2000; Saleem and Logothetis 2007). **Figure 1A** shows this parcellation displayed on medial and lateral views of the M132 left hemisphere surface, generated from contours running through the cortical midthickness (layer 4). **Figure 1B-D** shows the same parcellation after landmark-based surface registration to the macaque F99 atlas, displayed on a midthickness, inflated, and flat map surfaces (Van Essen 2004; Van Essen et al. 2011a). Section contours for the complete atlas parcellation are shown in **Figure S7**.

The M132 parcellation is similar to the previously published M129 atlas (Markov et al. 2011) but differs in the following respects. It includes area 7op in the upper limb of the lateral sulcus caudal to area SII (Pandya and Seltzer 1982; Preuss and Goldman-Rakic 1991). Area PO is split into separate areas V6 and V6A (Colby et al. 1988; Luppino et al. 2005). Area STP is subdivided into STPr (rostral), STPi (intermediate), and STPc (caudal) (Cusick et al. 1995; Padberg et al. 2003). Areas PGm and PEcg are combined into area 7m in the medial parietal cortex (Pandya and Seltzer 1982; Morecraft

et al. 2004; Margulies et al. 2009). In ventrolateral prefrontal cortex, area 45A is distinguished rostral to area 45B and ventral to the principal sulcus (Gerbella et al. 2010). A finer-grained subdivision of area 8 in the arcuate sulcus enabled demarcation of a small area 45B ventral to area 8/FEF and a small reported non-saccadic strip lining the caudal tip of the principal sulcus which we refer to as 8r (Gerbella et al. 2007). Area 8/FEF is subdivided into a medial large saccade-related area, area 8m, and a lateral small saccade-related area, area 8l (Schall et al. 1995; Sommer and Wurtz 2000). Area TE was subdivided into area TEa/m p, TEa/m a, TEpd, TEpv, TEad and TEav. The region immediately dorsal to TEO and buried in the ventral bank of STS is identified as area TEOm. Areal boundaries in individual hemispheres were generally based on geographical correspondences with the M132 atlas sections (**Figure S7**). In some cases involving V1 and V2 injections, histological assessment of areal limits did not significantly change the parcellation or the areal FLNe values, thereby supporting the use of geographical delineation of areal limits for determining the FLNe of cortical projections (Markov et al. 2011).

Having the M132 parcellation mapped to the F99 atlas (**Figure 1B-D**) in a freely available dataset can facilitate comparisons of our results with numerous published parcellations that have also been mapped to the F99 atlas (Van Essen et al. 2011a). As an additional aid to objective analysis of our data, we charted the estimated location of all injection sites on the atlas surface.

To localize injection sites on the F99 atlas surface, we used information about injection site centers in relation to anatomical landmarks as well as areal boundaries that had been mapped onto the histological section contours of each individual hemisphere. The center of each injection was localized relative to areal boundaries and anatomical landmarks within the section containing the injection center and also in relation to the distance from the areal boundaries and anatomical landmarks along the axis orthogonal to the sectioning plane. These estimates of relative position within the injected hemisphere were used to position the injection site relative to areal boundaries on the atlas surface. The x, y, z coordinates of the estimated injection site locations are reported in **Table S7**. While there are some uncertainties in this process, the reported coordinates are likely to be accurate within 5 mm in most cases.

**Estimating symmetry of bidirectional connections.** To evaluate the similarity of FLNe values between reciprocally connected areas, we used the negative binomial cumulative distribution function to calculate a 95% confidence interval for the number of neurons observed, taking the observed number as an estimate of the population mean. To transform these numbers to FLNe values, we divided by the total number of neurons labeled by the injection. The total number is the sum of negative binomially distributed projections each with the same dispersion parameter and will therefore also be distributed as a negative binomial having the same dispersion. To incorporate this additional source of variability into the calculation, we computed a confidence interval also on the total number of neurons in the injection and took the extreme values of the ratio of the projection and total injection confidence intervals as a confidence interval for the FLNe. This gave values similar to those previously estimated from making repeat injections in 3 early visual areas (Markov et al. 2011). We use the confidence intervals in order to evaluate the symmetry of reciprocal projections. If the confidence values of the FLNe values do not overlap we designate the pathway as asymmetrical.

**Ordering of connectivity matrix.** A 29 x 91 connectivity matrix was generated that encodes the weights of all observed pairwise connections. The row and column orders of this matrix were based on a simple clustering approach. A distance (or dissimilarity) measure was defined on the basis of the similarity between areas of their weighted inputs and outputs. We used a non-metric, multidimensional scaling (MDS) algorithm (de Leeuw and Mair 2009) on the matrix of distances and ordered the rows and columns by the first component. (The results were nearly the same using a principal components algorithm instead.) Distance between input profiles (outputs) of two areas was defined by first taking the reciprocal of the dot product between their columns (rows) (Jouve et al. 1998). The more similar the set of weights for a given area, the smaller this value. If the areas shared no common inputs (outputs), the distance would be infinity, but we observed no areas for which this situation arose. We ordered the matrix in two sweeps, first ordering the rows on the basis only of the output (row) distances, followed by ordering the columns only on the basis of the input (column) distances. The order of these two operations had no effect on the final matrix configuration.

**Data availability.** The datasets associated with the surface-based analyses shown in **Figures 1, 7 and S1** are available at:

[http://sumsdb.wustl.edu:8081/sums/directory.do?id=8287442&dir\\_name=MARKOV\\_CC12](http://sumsdb.wustl.edu:8081/sums/directory.do?id=8287442&dir_name=MARKOV_CC12)

## Reference

- Barone P, Batardiere A, Knoblauch K, Kennedy H. 2000. Laminar distribution of neurons in extrastriate areas projecting to visual areas V1 and V4 correlates with the hierarchical rank and indicates the operation of a distance rule. *J Neurosci.* 20: 3263-3281.
- Batardiere A, Barone P, Dehay C, Kennedy H. 1998. Area-specific laminar distribution of cortical feedback neurons projecting to cat area 17: quantitative analysis in the adult and during ontogeny. *J Comp Neurol.* 396: 493-510.
- Colby CL, Gattass R, Olson CR, Gross CG. 1988. Topographical organization of cortical afferents to extrastriate visual area PO in the macaque: a dual tracer study. *J Comp Neurol.* 269: 392-413.
- Cusick CG, Seltzer B, Cola M, Griggs E. 1995. Chemoarchitectonics and corticocortical terminations within the superior temporal sulcus of the rhesus monkey: evidence for subdivisions of superior temporal polysensory cortex. *J Comp Neurol.* 360: 513-535.
- de Leeuw J, Mair P. 2009. Multidimensional Scaling Using Majorization: SMACOF in R. *J Stat Soft.* 31: 1-30, URL <http://www.jstatsoft.org/v31/i03/>.
- Frey S, Comeau R, Hynes B, Mackey S, Petrides M. 2004. Frameless stereotaxy in the nonhuman primate. *Neuroimage.* 23: 1226-1234.
- Friendly M. 1994. Mosaic displays for multi-way contingency tables. *J Am Stat Assoc.* 89: 190-200
- Gerbella M, Belmalih A, Borra E, Rozzi S, Luppino G. 2007. Multimodal architectonic subdivision of the caudal ventrolateral prefrontal cortex of the macaque monkey. *Brain Struct Funct.* 212: 269-301.
- Gerbella M, Belmalih A, Borra E, Rozzi S, Luppino G. 2010. Cortical connections of the macaque caudal ventrolateral prefrontal areas 45A and 45B. *Cereb Cortex.* 20: 141-168.
- Hof PR, Morrison JH. 1995. Neurofilament protein defines regional patterns of cortical organization in the macaque monkey visual system: a quantitative immunohistochemical analysis. *J Comp Neurol.* 352: 161-186.
- Jouve B, Rosenstiehl P, Imbert M. 1998. A mathematical approach to the connectivity between the cortical visual areas of the macaque monkey. *Cereb Cortex.* 8: 28-39.
- Keizer K, Kuypers HGJM, Huisman AM, Dann O. 1983. Diamidino Yellow dihydrochloride (DY 2HCl): a new fluorescent retrograde neuronal tracer, which migrates only very slowly out of the cell. *Exp Brain Res.* 51: 179-191.
- Kennedy H, Bullier J. 1985. A double-labeling investigation of the afferent connectivity to cortical areas V1 and V2 of the macaque monkey. *J Neurosci.* 5: 2815-2830.
- Luppino G, Hamed SB, Gamberini M, Matelli M, Galletti C. 2005. Occipital (V6) and parietal (V6A) areas in the anterior wall of the parieto-occipital sulcus of the macaque: a cytoarchitectonic study. *Eur J Neurosci.* 21: 3056-3076.
- Margulies DS, Vincent JL, Kelly C, Lohmann G, Uddin LQ, Biswal BB, Villringer A, Castellanos FX, Milham MP, Petrides M. 2009. Precuneus shares intrinsic functional architecture in humans and monkeys. *Proc Natl Acad Sci U S A.* 106: 20069-20074.
- Markov NT, Misery P, Falchier A, Lamy C, Vezoli J, Quilodran R, Gariel MA, Giroud P, Ercsey-Ravasz M, Pilaz LJ, Huissoud C, Barone P, Dehay C, Toroczka Z, Van Essen DC, Kennedy H, Knoblauch K. 2011. Weight Consistency Specifies Regularities of Macaque Cortical Networks. *Cereb Cortex.* 21: 1254-1272.
- Morecraft RJ, Cipolloni PB, Stilwell-Morecraft KS, Gedney MT, Pandya DN. 2004. Cytoarchitecture and cortical connections of the posterior cingulate and adjacent somatosensory fields in the rhesus monkey. *J Comp Neurol.* 469: 37-69.
- Padberg J, Seltzer B, Cusick CG. 2003. Architectonics and cortical connections of the upper bank of the superior temporal sulcus in the rhesus monkey: an analysis in the tangential plane. *J Comp Neurol.* 467: 418-434.
- Pandya DN, Seltzer B. 1982. Intrinsic connections and architectonics of posterior parietal cortex in the rhesus monkey. *J Comp Neurol.* 204: 196-210.
- Paxinos G, Huang XF, Toga AW. 2000. The rhesus monkey brain in stereotaxic coordinates. San Diego, CA: Academic Press.
- Preuss TM, Goldman-Rakic PS. 1991. Myelo- and cytoarchitecture of the granular frontal cortex and surrounding regions in the strepsirhine primate Galago and the anthropoid primate Macaca. *J Comp Neurol.* 310: 429-474.
- Rosene DL, Roy NJ, Davis BJ. 1986. A cryoprotection method that facilitates cutting frozen sections of whole monkey brains for histological and histochemical processing without freezing artifact. *J Histochem Cytochem.* 34: 1301-1315.

- Saleem KS, Logothetis NK. 2007. A combined MRI and histology atlas of the rhesus monkey brain in stereotaxic coordinates. Amsterdam ; Boston: Elsevier/Academic Press. ix, 326 p.
- Schall JD, Morel A, King DJ, Bullier J. 1995. Topography of visual cortex connections with frontal eye field in macaque: Convergence and segregation of processing streams. *J Neurosci.* 15: 4464-4487.
- Sommer MA, Wurtz RH. 2000. Composition and topographic organization of signals sent from the frontal eye field to the superior colliculus. *J Neurophysiol.* 83: 1979-2001.
- Van Essen DC. 2004. Surface-based approaches to spatial localization and registration in primate cerebral cortex. *Neuroimage.* 23 Suppl 1: S97-107.
- Van Essen DC, Glasser MF, Dierker D, Harwell J. 2011a. Cortical Parcellations of the macaque monkey analyzed on surface-based atlases. *Cereb Cortex.* Nov 2. [Epub ahead of print]. doi: 10.1093/cercor/bhr290.
- Vezoli J, Falchier A, Jouve B, Knoblauch K, Young M, Kennedy H. 2004. Quantitative analysis of connectivity in the visual cortex: extracting function from structure. *Neuroscientist.* 10: 476-482.

## 2) Supplementary tables

Table S1. Newfound projections and bibliographical references to known projections.

ENTO: Entorhinal, PERI: Perirhinal, PIRI: Piriform, Pole: Temporal Pole, SUB: Subiculum.  
*Details of the bibliographic references for individual projections are given in Table S6.*

| AREA         | KNOWN                                                                                                                                                                                                                                                                              | Ref.                                                           | NFP                                                                                                                                                                          |
|--------------|------------------------------------------------------------------------------------------------------------------------------------------------------------------------------------------------------------------------------------------------------------------------------------|----------------------------------------------------------------|------------------------------------------------------------------------------------------------------------------------------------------------------------------------------|
| <b>V1</b>    | V2, V3, V3A, V4, V4t, LIP, PIP, STPi, STPc, PGa, FST, MST, MT, TEO, TEOm, PERI, TEpd, TEpv, TEa/mp, TH/TF, CORE, MB, LB, PBc, 8l                                                                                                                                                   | (1-15)                                                         | 7op, DP, STPr, TPt, IPa, TEad, TEav, TEa/ma, 8r                                                                                                                              |
| <b>V2</b>    | V1, V3, V3A, V4, V4t, LIP, PIP, DP, STPr, STPc, PGa, FST, MST, MT, TEO, TEOm, TEpv, TEa/ma, TEa/mp, TH/TF                                                                                                                                                                          | (1, 3, 6-7, 9-11, 13, 14, 16-21)                               | VIP, V6, V6A, STPi, TPt, IPa, PERI, TEad, TEav, TEpd, MB, PBc, 8l, 8m                                                                                                        |
| <b>V4</b>    | V1, V2, V3, V3A, V4t, 7A, LIP, PIP, DP, FST, MT, TEO, TEOm, PERI, TEad, TEav, TEpd, TEpv, TEa/ma, TEa/mp, TH/TF, 8l, 8r                                                                                                                                                            | (2-4, 9-11, 13, 17, 19-24, 25)                                 | STPr, STPi, STPc, PGa, IPa, MST, ENTO, LB, INSULA, 9/46d, 9/46v, 45B                                                                                                         |
| <b>TEO</b>   | V2, V3, V3A, V4, V4t, 7A, 7B, LIP, DP, STPr, STPi, STPc, PGa, IPa, FST, MST, MT, TEOm, PERI, TEad, TEav, TEpd, TEpv, TEa/ma, TEa/mp, TH/TF, POLE, 46v, 9/46v, 8B, 8l, 8r, 45B, 45A, 12                                                                                             | (3-4, 17, 19, 21-33)                                           | MIP, PIP, 5, 7m, ENTO, MB, LB, PBr, PBc, Parainsula, INSULA, 1, 2, 3, 23, 24a, 24b, 24d, F2, F7, F5, ProM, 46d, 9/46d, 44, 11                                                |
| <b>9/46d</b> | V2, Pro.St., 7op, 7A, 7B, LIP, 5, 7m, STPr, STPi, STPc, POLE, LB, PBr, PBc, INSULA, 2, 23, 24a, 24b, 24c, 29/30, 31, 32, F2, F7, F6, F5, ProM, 10, 9, 46d, 46v, 9/46v, 8B, 8m, 8r, 45B, 45A, 11, 14, 12, 13                                                                        | (24, 34-48)                                                    | V3, V4, VIP, MIP, PIP, DP, V6, V6A, TPt, PGa, FST, MST, MT, TEO, PERI, TEad, TEav, TEa/ma, TEa/mp, CORE, MB, Parainsula, Gu, SII, 24d, F1, F3, F4, 8l, 44, OPRO, OPAI        |
| <b>F5</b>    | 7op, 7A, 7B, LIP, AIP, 5, TEa/ma, POLE, Parainsula, INSULA, Gu, SII, 1, 2, 3, 24a, 24b, 24c, 24d, F1, F2, F7, F3, F6, F4, ProM, 46d, 46v, 9/46d, 9/46v, 8B, 8l, 8m, 8r, 45B, 44, 12, 13                                                                                            | (35-38, 44, 47-55)                                             | V1, V2, V3, MIP, V6, V6A, 7m, STPr, STPi, STPc, TEOm, PERI, TEav, TEpd, TEpv, TEa/mp, ENTO, TH/TF, SUB, CORE, MB, LB, PBr, 23, 29/30, 32, 10, 9, 45A, OPRO, OPAI, 11, 14, 25 |
| <b>8m</b>    | V2, V3, V3A, V4, V4t, 7A, 7B, LIP, VIP, DP, 5, STPi, STPc, TPt, PGa, IPa, FST, MST, MT, TEpd, TEpv, TH/TF, POLE, CORE, MB, LB, PBr, PBc, INSULA, 3, 23, 24a, 24b, 24c, 29/30, 31, F2, F7, F6, F4, 9, 46d, 46v, 9/46d, 9/46v, 8B, 8l, 8r, 45B, 45A, 12                              | (3, 20, 24, 26, 29, 33, 34, 36, 37, 39, 41, 42, 44, 47, 54-57) | 7op, MIP, PIP, AIP, V6A, 7m, STPr, TEOm, PERI, TEa/ma, TEa/mp, ENTO, Parainsula, Gu, SII, 2, 24d, 32, F1, F3, F5, ProM, 10, 44, OPRO, OPAI, 11, 14, 13                       |
| <b>7A</b>    | V2, V4, 7B, LIP, VIP, MIP, PIP, DP, V6, V6A, 5, 7m, STPr, STPi, STPc, TPt, PGa, IPa, FST, MST, MT, TEO, TEOm, PERI, TEpd, TEpv, TEa/ma, TEa/mp, ENTO, TH/TF, POLE, LB, INSULA, 2, 23, 24a, 24b, 29/30, 31, F2, F7, F3, F5, 9, 46d, 46v, 9/46d, 9/46v, 8B, 8l, 8m, 45B, 45A, 12, 13 | (3, 18, 22-25, 27, 29, 33, 41, 45, 47, 58-67)                  | V1, V3A, TEav, MB, F1                                                                                                                                                        |
| <b>DP</b>    | V2, V3, V3A, V4, 7A, LIP, VIP, MIP, PIP, V6, V6A, 7m, MST, MT, TEO, TEpd, TEpv, TH/TF, 23, 29/30, 9, 46d, 8B, 8m, 8r, 45B                                                                                                                                                          | (3, 9, 11, 20, 23, 24, 29, 42, 62, 68)                         | V1, V4t, Pro.St., STPr, STPi, STPc, TPt, PGa, IPa, FST, TEOm, PERI, TEad, TEav, TEa/ma, TEa/mp, ENTO, SUB, PBc, INSULA, 24b, 24c, 31, F2, F7, F4, F5, 46v, 9/46d, 45A, 12    |
| <b>2</b>     | 7op, 7A, 7B, LIP, VIP, AIP, INSULA, SII, 1, 3, 24b, 24d, F1, F3, F4, F5, ProM, 9/46v, 44                                                                                                                                                                                           | (3, 35, 37, 51, 55, 69, 70)                                    | PERI, TEav, TEa/ma, ENTO, POLE, MB, LB, Gu, 24c, 31, 46d, OPRO, OPAI, 12, 13, PIRI                                                                                           |
| <b>5</b>     | 7op, 7A, 7B, LIP, VIP, MIP, AIP, 7m, MST, INSULA, 1, 2, 3, 23, 24b, 24d, 29/30, 31, F1, F2, F7, F3, F6, F5, 46d                                                                                                                                                                    | (3, 24, 35, 43, 62, 64, 69, 71-73)                             | STPi, TPt, PERI, TEa/ma, ENTO, POLE, MB, 24a, 12                                                                                                                             |

| AREA        | KNOWN                                                                                                                                                                                                                                                           | Ref.                                                         | NFP                                                                                                                                                 |
|-------------|-----------------------------------------------------------------------------------------------------------------------------------------------------------------------------------------------------------------------------------------------------------------|--------------------------------------------------------------|-----------------------------------------------------------------------------------------------------------------------------------------------------|
| <b>7B</b>   | 7op, 7A, LIP, VIP, MIP, AIP, V6A, 5, 7m, STPr, STPi, STPc, TPt, MST, MT, TEa/ma, MB, INSULA, SII, 2, 23, 24b, 24c, 24d, F1, F2, F3, F4, F5, ProM, 46v, 9/46d, 9/46v, 8m, 45B, 44, 12                                                                            | (3, 18, 22, 35, 47, 51, 60, 62, 67, 74-75)                   | V2, PGa, PERI, TEpv, TH/TF, LB, PBc                                                                                                                 |
| <b>STPr</b> | 7A, STPi, STPc, TPt, PGa, IPa, FST, MST, MT, PERI, TEad, TEpv, TEa/ma, ENTO, TH/TF, POLE, MB, LB, PBr, PBc, Parainsula, 23, 29/30, 32, 10, 9, 46d, 46v, 9/46d, 9/46v, 45B, 45A, 11, 14, 25, 12, 13                                                              | (3, 25, 32, 38, 39, 42, 45, 64, 66, 76-81)                   | V2, V4, Pro.St., LIP, DP, TEO, TEOm, TEav, TEpd, TEa/mp, SUB, CORE, INSULA, Gu, 24a, 24b, 24c, F1, F2, F7, F4, 8B, 8l, 8m, 8r, 44, OPRO, OPAI, PIRI |
| <b>STPi</b> | Pro.St., LIP, STPr, STPc, TPt, PGa, MST, MT, PERI, TEav, TH/TF, POLE, CORE, MB, LB, PBr, PBc, Parainsula, 23, 24c, 29/30, 32, 10, 9, 46d, 46v, 9/46d, 8m, 14, 25, 12, 13                                                                                        | (19-20, 25, 35, 38, 39, 42-43, 45, 47, 64, 66, 76, 78-80)    | V4t, IPa, TEpd, TEa/ma, TEa/mp, INSULA, Gu, 24d, F7, F6, 8B, 45A, OPRO, 11                                                                          |
| <b>STPc</b> | V2, V4, Pro.St., 7op, 7A, 7B, LIP, PIP, 5, 7m, STPr, STPi, TPt, PGa, IPa, FST, MST, MT, PERI, TEav, TH/TF, POLE, MB, PBr, PBc, INSULA, 23, 29/30, 31, 46d, 46v, 9/46d, 8B, 8l, 8m, 8r, 45B, 45A, 12                                                             | (3, 20, 22, 24, 25, 35, 39, 42, 45, 47, 62, 64, 76-77, 79)   | V3A, VIP, DP, V6A, TEO, TEOm, TEad, TEpd, TEpv, TEa/ma, TEa/mp, ENTO, SUB, CORE, LB, Parainsula, 2, 24b, 24c, F7, F6, F5, 10, 9, 13                 |
| <b>PBr</b>  | STPr, STPi, STPc, TPt, PGa, IPa, FST, PERI, TH/TF, POLE, CORE, MB, LB, PBc, Parainsula, INSULA, 23, 24b, 24c, 32, F7, 10, 9, 46d, 46v, 9/46d, 8m, 45A, OPRO, OPAI, 11, 14, 25, 12, 13                                                                           | (19, 25, 38, 40, 42, 45, 65, 79-85)                          | V2, V4, Pro.St., 7A, LIP, DP, 7m, MST, ENTO, SUB, 24a, 24d, 29/30, 31, F6, ProM, 8B, 8l, 8r, 45B, PIRI                                              |
| <b>TEpd</b> | V2, V4, V4t, 7A, LIP, STPr, PGa, IPa, FST, MST, MT, TEO, TEOm, PERI, TEad, TEav, TEpv, TEa/ma, TEa/mp, ENTO, TH/TF, POLE, 46d, 46v, 9/46v, 8l, 8m, 8r, 45B, 45A, 44, OPRO, OPAI, 12, 13                                                                         | (3, 19, 25-27, 29, 32, 33, 38, 65, 66, 86, 87)               | V3, V3A, Pro.St., PIP, DP, STPi, STPc, CORE, MB, LB, PBr, Parainsula, INSULA, SII, 3, 23, 24a, 24b, F6, F5, 11, PIRI                                |
| <b>24c</b>  | 7op, 7A, 7B, VIP, 5, 7m, STPr, STPi, STPc, IPa, MST, INSULA, SII, 1, 2, 3, 23, 24a, 24b, 24d, 29/30, 31, 32, F1, F2, F7, F3, F6, F4, F5, ProM, 10, 9, 46d, 46v, 9/46d, 9/46v, 8B, 8l, 8m, 8r, 45B, 44, OPRO, 11, 12                                             | (35-38, 44-47, 55, 64, 88-93)                                | LIP, MIP, V6, V6A, TEpv, CORE, LB                                                                                                                   |
| <b>F1</b>   | 7op, 7A, 5, STPc, MB, INSULA, 1, 2, 3, 23, 24b, 24c, 24d, 29/30, F2, F7, F3, F6, F4, F5, ProM, 8B, 8m, 44                                                                                                                                                       | (3, 37, 50, 51, 55, 69, 70, 88, 90, 94-101)                  | MST, 9                                                                                                                                              |
| <b>F2</b>   | 7op, 7A, 7B, LIP, VIP, MIP, AIP, 5, 7m, STPi, STPc, TPt, MST, Parainsula, INSULA, SII, 3, 23, 24a, 24b, 24c, 24d, 31, F1, F7, F3, F6, F4, F5, 46v, 9/46d, 9/46v, 8B, 8l, 8m, 8r, 44                                                                             | (34-37, 39, 44, 47, 52, 55, 70, 73, 88, 92, 95, 99, 102-105) | STPr, PGa, IPa, MT, PERI, TEa/ma, POLE, MB, PBr, ProM, 45B, OPRO, 12, 13                                                                            |
| <b>F7</b>   | 7op, 7A, 7B, LIP, 5, 7m, STPr, STPi, STPc, TPt, PGa, IPa, FST, MST, TEa/ma, TEa/mp, POLE, PBc, Parainsula, INSULA, SII, 23, 24a, 24b, 24c, 24d, 31, 32, F1, F2, F3, F6, F4, F5, ProM, 10, 9, 46d, 46v, 9/46d, 9/46v, 8B, 8l, 8m, 8r, 45B, 45A, 44, OPRO, 12, 13 | (35-37, 39, 42, 44, 47, 55, 73, 88, 99, 102, 104-107)        | V2, VIP, TEO, PERI, TEav, MB, PBr, 1, 3, 11, 14                                                                                                     |
| <b>ProM</b> | AIP, PERI, TEa/ma, POLE, INSULA, Gu, SII, 1, 2, 3, 24b, 24c, 24d, F2, F3, F4, F5, 46v, 9/46v, 44, OPRO, OPAI, 12, 13                                                                                                                                            | (25, 35, 38, 44, 47, 48, 54, 55, 57, 108)                    | 7op, 7A, 7B, LIP, PGa, TEav, ENTO, MB, 24a, F1, 9, 46d, 11                                                                                          |
| <b>8l</b>   | V2, V3, V3A, V4, V4t, 7op, 7A, 7B, LIP, VIP, MIP, PIP, AIP, DP, V6A, 5, STPr, STPi, STPc, TPt, PGa, IPa, FST, MST, MT,                                                                                                                                          | (3, 20, 26, 29, 33, 34, 38, 39, 41,                          | V1, 7m, TEav, ENTO, SUB, POLE, CORE, MB, PBr, PBc, Parainsula, Gu, SII, 2, 3, 24c, 24d, 29/30, 31, 32, F3, 10,                                      |

| AREA  | KNOWN                                                                                                                                                                                                                                                          | Ref.                                                         | NFP                                                                                                                                                                                                    |
|-------|----------------------------------------------------------------------------------------------------------------------------------------------------------------------------------------------------------------------------------------------------------------|--------------------------------------------------------------|--------------------------------------------------------------------------------------------------------------------------------------------------------------------------------------------------------|
|       | TEO, TEOm, PERI, TEad, TEpd, TEpv, TEa/ma, TEa/mp, TH/TF, LB, INSULA, 23, 24a, 24b, F1, F2, F7, F6, F4, F5, ProM, 9, 46d, 46v, 9/46d, 9/46v, 8B, 8m, 8r, 45B, 45A, 44, 12                                                                                      | 44, 47, 55, 57, 87, 109)                                     | OPRO, OPAl, 11, 14, 25, 13, PIRI                                                                                                                                                                       |
| 9/46v | V3, 7op, 7A, 7B, LIP, AIP, V6A, 7m, STPr, STPi, STPc, PGa, IPa, FST, PERI, TEav, TEpv, TEa/ma, TEa/mp, TH/TF, POLE, INSULA, SII, 2, 23, 24a, 24b, 24c, F2, F7, F3, F6, F4, F5, ProM, 46d, 46v, 9/46d, 8B, 8l, 8m, 8r, 45B, 45A, 44, OPRO, OPAl, 11, 14, 12, 13 | (24, 35-38, 44, 47, 48, 54, 55, 57, 66, 87, 109-112)         | VIP, 5, TPt, MST, TEOm, TEad, TEpd, ENTO, MB, PBr, PBc, Parainsula, Gu, 3, 24d, 29/30, 31, 32, F1, 10, 9                                                                                               |
| 46d   | 7A, LIP, 7m, STPr, STPi, STPc, TH/TF, PBc, 23, 29/30, 31, 32, F7, 10, 9, 46v, 9/46d, 9/46v, 8B, 8l, 8m, 8r, 45A, 14, 12, 13                                                                                                                                    | (25, 36-39, 42-45, 47, 48, 57, 113)                          | V2, V3, 7op, VIP, MIP, DP, V6A, PGa, MST, MT, TEO, TEOm, PERI, TEpd, TEpv, ENTO, POLE, PBr, Parainsula, INSULA, 2, 3, 24a, 24b, 24c, 24d, F1, F2, F3, F6, F4, F5, 44, OPRO, 11                         |
| 8B    | 7A, LIP, 7m, STPr, STPi, TH/TF, LB, 23, 24a, 29/30, 31, 32, F2, F7, F6, 10, 9, 46d, 46v, 9/46d, 8l, 8m, 8r, 45B, 45A, 14, 12, 13                                                                                                                               | (34, 37-39, 41, 42, 44, 45, 47, 55, 57)                      | V4, DP, STPc, PGa, IPa, FST, PERI, TEad, TEa/ma, TEa/mp, ENTO, POLE, CORE, MB, PBr, Parainsula, INSULA, SII, 24b, 24c, 24d, F1, F4, F5, 9/46v, 44, OPRO, OPAl, 11, 25, PIRI                            |
| MT    | V1, V2, V3, V3A, V4, V4t, 7A, LIP, VIP, MIP, PIP, DP, V6A, STPc, IPa, FST, MST, TEO, TEOm, TEa/mp, 8l, 8m                                                                                                                                                      | (3-4, 9, 11, 13, 14, 17, 19, 20-22, 24, 47, 74, 76, 79, 118) | Pro.St., STPr, STPi, TPt, PGa, PERI, TEad, TEav, TEpd, TEpv, TEa/ma, TH/TF, SUB, POLE, MB, LB, PBr, INSULA, SII, 1, 2, 23, 24a, 24b, 29/30, 32, F1, F2, F4, F5, ProM, 9/46d, 9/46v, 8r, 45B, 45A, OPRO |
| 7m    | V2, V3, 7op, 7A, 7B, LIP, VIP, MIP, PIP, DP, V6, V6A, 5, STPr, STPi, STPc, TPt, MST, MT, PERI, ENTO, TH/TF, MB, INSULA, 1, 2, 3, 23, 24a, 24b, 24c, 24d, 29/30, 31, 32, F1, F2, F7, F3, F6, F5, 9, 46d, 46v, 9/46d, 9/46v, 8B, 8m, 8r, 45B                     | (18, 19, 22, 35, 43, 47, 62, 64, 65, 67, 119)                | V1, V3A, V4, Pro.St., AIP, PGa, IPa, FST, TEpd, TEpv, TEa/mp, LB, PBr, PBc, 8l, 44, 11, 14, 25, 12, 13                                                                                                 |
| 10    | V2, Pro.St., STPr, STPi, STPc, PERI, TEav, TEa/ma, ENTO, TH/TF, POLE, CORE, MB, LB, PBr, PBc, Parainsula, INSULA, 23, 24a, 24b, 24c, 29/30, 31, 32, F5, 9, 46d, 46v, 9/46d, 9/46v, 8B, 8l, 8m, 45B, 45A, 44, OPRO, OPAl, 11, 14, 25, 12, 13                    | (25, 36, 38, 41, 42, 44, 46-48, 54, 57, 64, 114-117)         | 7op, 7A, LIP, MIP, PIP, DP, PGa, IPa, FST, MST, TEad, TEpd, TEpv, TEa/mp, SUB, 24d, F1, F2, F7, F3, F6, F4, 8r                                                                                         |



Table S2. Animal cases and procedures

| A    | B      | C                   | D                                | E              | F                | G                        | H                                   |
|------|--------|---------------------|----------------------------------|----------------|------------------|--------------------------|-------------------------------------|
| Case | Animal | Hemisphere /Tracers | Uptake Volume (mm <sup>3</sup> ) | Injection site | Plane of section | Paper (P) /Mercator® (M) | Frequency of examination of section |
| 1    | M81    | LH / DY             |                                  | V1 central     | H                | M                        | 1/2                                 |
| 2    | M85    | LH / FB             |                                  | V1 central     | H                | M                        | 1/2                                 |
| 3    | M85    | RH / FB+DY          |                                  | V1 central     | H                | M                        | 1/2                                 |
| 4    | M88    | RH / FB             |                                  | V1 central     | H                | M                        | 1/2                                 |
| 5    | M121   | RH / DY             |                                  | V1 central     | C                | M                        | 1/2                                 |
|      |        |                     | 8.86                             |                |                  |                          |                                     |
| 6    | M101   | LH / DY             |                                  | V2 central     | C                | M                        | 1/2                                 |
| 7    | M101   | RH / FB             |                                  | V2 central     | C                | M                        | 1/2                                 |
| 8    | M103   | LH / DY             |                                  | V2 central     | C                | M                        | 1/2                                 |
|      |        |                     | 2.59                             |                |                  |                          |                                     |
| 9    | M121   | RH / FB             |                                  | V4 central     | C                | M                        | 1/2                                 |
| 10   | M123   | LH / DY             |                                  | V4 central     | C                | M                        | 1/2                                 |
|      |        |                     | 7                                |                |                  |                          |                                     |
| 11   | M119   | LH / FB             | 2.56                             | TEO            | C                | M                        | 1/2                                 |
| 12   | M106   | LH / FB             | 9.28                             | 9/46d          | C                | M                        | 1/2                                 |
| 13   | M106   | RH / DY             | 3.83                             | F5             | C                | M                        | 1/2                                 |
| 14   | BB272  | LH / DY             | 1.73                             | 8m             | C                | M                        | 1/2                                 |
| 15   | BB135  | LH / DY             | 4.82                             | 7A             | H                | P/M                      | 1/4                                 |
| 16   | M89    | LH / DY             | 3.13                             | DP             | H                | M                        | 1/2                                 |
| 17   | M98    | LH / FB             | 4.21                             | 2              | C                | M                        | 1/2                                 |
| 18   | M70    | LH / FB+DY          | 5.04                             | 5              | H                | P/M                      | 1/4                                 |
| 19   | M68    | LH / DY             | 1.56                             | 7B             | P                | M                        | 1/2                                 |
| 20   | BB289  | LH / FB             | 1.95                             | STPr           | C                | M                        | 1/4                                 |
| 21   | BB289  | LH / DY             | 0.42                             | STPi           | C                | M                        | 1/4                                 |
| 22   | M90    | RH / FB             | 1.33                             | STPc           | H                | M                        | 1/4                                 |
| 23   | M108   | LH / FB             | 5.32                             | PBr            | C                | M                        | 1/2                                 |
| 24   | M128   | LH / FB             | 5.88                             | TEpd           | C                | M                        | 1/2                                 |
| 25   | NICO*  | RH / FB             | 1.94                             | 24c            | C                | M                        | 1/2                                 |
| 26   | M69    | LH / DY             | 6.43                             | F1             | H                | P/M                      | 1/4                                 |
| 27   | M102   | LH / DY             | 3.1                              | F2             | C                | M                        | 1/2                                 |
| 28   | M102   | LH / FB             | 2.47                             | F7             | C                | M                        | 1/2                                 |
| 29   | M98    | LH / DY             | 3.39                             | ProM           | C                | M                        | 1/2                                 |
| 30   | BB272  | RH / FB             | 1.82                             | 8l             | C                | M                        | 1/2                                 |
| 31   | M116   | RH / FB             | 2.81                             | 9/46v          | C                | M                        | 1/4                                 |
| 32   | M116   | RH / DY             | 1.35                             | 46d            | C                | M                        | 1/4                                 |
| 33   | M128   | LH / DY             | 2.87                             | 8B             | C                | M                        | 1/2                                 |
| 34   | M131   | LH / FB             | 3.89                             | 10             | C                | M                        | 1/2                                 |
| 35   | M133   | LH / DY             | 4.32                             | MT             | C                | M                        | 1/2                                 |
| 36   | M136   | LH / DY             | 7.49                             | 7m             | C                | M                        | 1/2                                 |
| 37   | M136   | LH / FB             | -                                | 10             | C                | M                        | 1/2                                 |
| 38   | M137   | LH / FB             | -                                | 10             | C                | M                        | 1/2                                 |
| 39   | BB341  | LH / FB             | -                                | 10             | C                | M                        | 1/2                                 |
| 40   | M132   | LH                  | <i>Used to build the atlas</i>   |                | C                | M                        | 1/2                                 |

*P* corresponds to charts of neurons stored on paper, and *M* to charts made and stored with Mercator® technology (see methods). \* Rhesus macaque.



**Table S3: Estimated Probability of occurrence of weak projections following repeat injections in areas V1, V2, V4 and 10.**

**Column A:** source and target for each projection; **Column B:** mean number of neurons observed across injections, used as estimate of the population mean; **Column C:** number of injections in which neurons were found; **Column D:** numbers of injections (5 in V1, 3 in V2, 2 in V4, 4 in area 10); **Column E:** dispersion parameter for negative binomial distribution fit to the data from the injection site (V1:6.6; V2:9.7; V4:7.1; area 10:5); **Column F:** estimated probability that no neurons observed from  $n$  injections (from Column D); **Column G:** estimated probability that at least one injection yielded no neurons; **Column H:** estimated probability of observing neurons for all injections ( $1 -$  Column G). Values of 0 in columns F-H indicate estimates  $< 1e-3$ .

| A                          | B                | C                                                    | D                              | E        | F                                                  | G                                                                        | H                                                     |
|----------------------------|------------------|------------------------------------------------------|--------------------------------|----------|----------------------------------------------------|--------------------------------------------------------------------------|-------------------------------------------------------|
| Pathway<br>Source → Target | Observed<br>mean | Number of<br>cases where<br>labelling is<br>detected | Number<br>of cases<br>injected | $\theta$ | P (absence of<br>neurons in all<br>$n$ injections) | P (absence of<br>neurons in at least<br>one of the repeat<br>injections) | P (present in<br>each of the<br>repeat<br>injections) |
| 7A->10                     | 33.25            | 3                                                    | 4                              | 5.0      | 0.000                                              | 0.000                                                                    | 1.000                                                 |
| DP->10                     | 22.25            | 3                                                    | 4                              | 5.0      | 0.000                                              | 0.001                                                                    | 0.999                                                 |
| 8r->V4                     | 9.50             | 1                                                    | 2                              | 7.1      | 0.000                                              | 0.005                                                                    | 0.995                                                 |
| INSULA->V4                 | 8.50             | 2                                                    | 2                              | 7.1      | 0.000                                              | 0.007                                                                    | 0.993                                                 |
| V6A->V2                    | 7.67             | 3                                                    | 3                              | 9.7      | 0.000                                              | 0.011                                                                    | 0.989                                                 |
| LB->V1                     | 7.60             | 4                                                    | 5                              | 6.6      | 0.000                                              | 0.031                                                                    | 0.969                                                 |
| ENTORHINAL->V4             | 7.50             | 2                                                    | 2                              | 7.1      | 0.000                                              | 0.012                                                                    | 0.988                                                 |
| 9/46v->10                  | 6.75             | 3                                                    | 4                              | 5.0      | 0.000                                              | 0.055                                                                    | 0.945                                                 |
| 8m->V2                     | 6.67             | 2                                                    | 3                              | 9.7      | 0.000                                              | 0.019                                                                    | 0.981                                                 |
| CORE->V1                   | 6.60             | 2                                                    | 5                              | 6.6      | 0.000                                              | 0.050                                                                    | 0.950                                                 |
| 44->10                     | 6.50             | 3                                                    | 4                              | 5.0      | 0.000                                              | 0.061                                                                    | 0.939                                                 |
| MB->V1                     | 5.60             | 3                                                    | 5                              | 6.6      | 0.000                                              | 0.084                                                                    | 0.916                                                 |
| PIP->10                    | 4.00             | 1                                                    | 4                              | 5.0      | 0.000                                              | 0.195                                                                    | 0.805                                                 |
| 45B->V4                    | 4.00             | 2                                                    | 2                              | 7.1      | 0.002                                              | 0.082                                                                    | 0.918                                                 |
| F5->10                     | 3.50             | 2                                                    | 4                              | 5.0      | 0.000                                              | 0.253                                                                    | 0.747                                                 |
| TEpv->10                   | 3.50             | 4                                                    | 4                              | 5.0      | 0.000                                              | 0.253                                                                    | 0.747                                                 |
| TEa/mp->10                 | 3.25             | 2                                                    | 4                              | 5.0      | 0.000                                              | 0.289                                                                    | 0.711                                                 |
| TEad->10                   | 3.00             | 2                                                    | 4                              | 5.0      | 0.000                                              | 0.330                                                                    | 0.670                                                 |
| STPr->V1                   | 2.80             | 3                                                    | 5                              | 6.6      | 0.000                                              | 0.399                                                                    | 0.601                                                 |
| TEpd->10                   | 2.50             | 3                                                    | 4                              | 5.0      | 0.000                                              | 0.432                                                                    | 0.568                                                 |
| 7op->V1                    | 2.40             | 1                                                    | 5                              | 6.6      | 0.00                                               | 0.499                                                                    | 0.501                                                 |
| MB->V2                     | 2.33             | 3                                                    | 3                              | 9.7      | 0.002                                              | 0.327                                                                    | 0.673                                                 |
| V2->10                     | 2.00             | 2                                                    | 4                              | 5.0      | 0.001                                              | 0.561                                                                    | 0.439                                                 |
| 7op->10                    | 2.00             | 1                                                    | 4                              | 5.0      | 0.001                                              | 0.561                                                                    | 0.439                                                 |
| F4->10                     | 1.75             | 3                                                    | 4                              | 5.0      | 0.002                                              | 0.636                                                                    | 0.364                                                 |
| STPr->V2                   | 1.67             | 1                                                    | 3                              | 9.7      | 0.010                                              | 0.516                                                                    | 0.484                                                 |
| 9/46v->V4                  | 1.50             | 1                                                    | 2                              | 7.1      | 0.066                                              | 0.447                                                                    | 0.553                                                 |
| MST->10                    | 1.50             | 1                                                    | 4                              | 5.0      | 0.005                                              | 0.715                                                                    | 0.285                                                 |
| LIP->10                    | 1.25             | 3                                                    | 4                              | 5.0      | 0.012                                              | 0.796                                                                    | 0.204                                                 |
| V6->V2                     | 1.00             | 1                                                    | 3                              | 9.7      | 0.058                                              | 0.769                                                                    | 0.231                                                 |
| LB->V4                     | 1.00             | 1                                                    | 2                              | 7.1      | 0.154                                              | 0.631                                                                    | 0.369                                                 |
| TPt->V1                    | 0.80             | 1                                                    | 5                              | 6.6      | 0.023                                              | 0.958                                                                    | 0.042                                                 |
| 9/46d->V4                  | 0.50             | 1                                                    | 2                              | 7.1      | 0.380                                              | 0.853                                                                    | 0.147                                                 |
| MIP->10                    | 0.50             | 1                                                    | 4                              | 5.0      | 0.149                                              | 0.979                                                                    | 0.021                                                 |
| F1->10                     | 0.50             | 1                                                    | 4                              | 5.0      | 0.149                                              | 0.979                                                                    | 0.021                                                 |

| A                          | B                | C                                                    | D                              | E        | F                                                | G                                                                        | H                                                     |
|----------------------------|------------------|------------------------------------------------------|--------------------------------|----------|--------------------------------------------------|--------------------------------------------------------------------------|-------------------------------------------------------|
| Pathway<br>Source → Target | Observed<br>mean | Number of<br>cases where<br>labelling is<br>detected | Number<br>of cases<br>injected | $\theta$ | P (absence of<br>neurons in all<br>n injections) | P (absence of<br>neurons in at least<br>one of the repeat<br>injections) | P (present in<br>each of the<br>repeat<br>injections) |
| F3->10                     | 0.50             | 1                                                    | 4                              | 5.0      | 0.149                                            | 0.979                                                                    | 0.021                                                 |
| PBc->V2                    | 0.33             | 1                                                    | 3                              | 9.7      | 0.374                                            | 0.978                                                                    | 0.022                                                 |
| TPt->V2                    | 0.33             | 1                                                    | 3                              | 9.7      | 0.374                                            | 0.978                                                                    | 0.022                                                 |
| 8r->V1                     | 0.20             | 1                                                    | 5                              | 6.6      | 0.373                                            | 1.000                                                                    | 0.000                                                 |

Table S4. Asymmetrical bidirectional, symmetrical bidirectional and unidirectional connections.

| Asymmetrical bidirectional connections |                 |
|----------------------------------------|-----------------|
| A                                      | B               |
| Pathway                                | Weight          |
| 2↔24c                                  | ← Medium→Medium |
| 2↔F1                                   | ← Medium→Strong |
| 24c↔10                                 | ← Medium→Medium |
| 24c↔8l                                 | ← Sparse→Medium |
| 24c↔8m                                 | ← Sparse→Medium |
| 24c↔9/46v                              | ← Medium→Medium |
| 46d↔8l                                 | ← Sparse→Strong |
| 46d↔9/46v                              | ← Medium→Strong |
| 5↔F5                                   | ← Medium→Sparse |
| 5↔F7                                   | ← Medium→Sparse |
| 7A↔46d                                 | ← Strong→Medium |
| 7A↔5                                   | ← Strong→Strong |
| 7A↔7B                                  | ← Medium→Strong |
| 7A↔8B                                  | ← Medium→Medium |
| 7A↔8m                                  | ← Strong→Medium |
| 7A↔F5                                  | ← Medium→Sparse |
| 7A↔F7                                  | ← Sparse→Medium |
| 7A↔STPc                                | ← Strong→Medium |
| 7A↔STPr                                | ← Medium→Medium |
| 7B↔24c                                 | ← Sparse→Medium |
| 7B↔7m                                  | ← Strong→Sparse |
| 7B↔F2                                  | ← Medium→Sparse |
| 7B↔STPc                                | ← Medium→Medium |
| 7m↔24c                                 | ← Medium→Strong |
| 7m↔8B                                  | ← Strong→Medium |
| 7m↔8m                                  | ← Strong→Medium |
| 7m↔PBr                                 | ← Sparse→Medium |
| 7m↔STPc                                | ← Strong→Sparse |
| 8B↔10                                  | ← Strong→Strong |
| 8B↔8l                                  | ← Medium→Strong |
| 8B↔F1                                  | ← Sparse→Medium |
| 8B↔DP                                  | ← Medium→Medium |
| 9/46v↔8B                               | ← Strong→Medium |
| 9/46v↔8l                               | ← Medium→Strong |
| DP↔7m                                  | ← Medium→Strong |
| DP↔8m                                  | ← Medium→Medium |
| DP↔9/46d                               | ← Medium→Sparse |
| DP↔MT                                  | ← Strong→Strong |
| DP↔TEpd                                | ← Medium→Sparse |
| DP↔V1                                  | ← Sparse→Medium |
| F1↔8m                                  | ← Sparse→Medium |
| F2↔8l                                  | ← Sparse→Strong |

|            |                 |
|------------|-----------------|
| F2↔8m      | ← Medium→Strong |
| F2↔9/46d   | ← Medium→Strong |
| F2↔9/46v   | ← Medium→Medium |
| F2↔F5      | ← Strong→Medium |
| F5↔8l      | ← Medium→Strong |
| F5↔8m      | ← Sparse→Medium |
| F5↔9/46d   | ← Sparse→Medium |
| F5↔ProM    | ← Strong→Strong |
| F7↔46d     | ← Medium→Medium |
| F7↔8l      | ← Medium→Strong |
| F7↔F1      | ← Medium→Medium |
| F7↔F5      | ← Medium→Sparse |
| MT↔8l      | ← Medium→Strong |
| MT↔9/46d   | ← Sparse→Medium |
| MT↔TEpd    | ← Strong→Sparse |
| PBr↔46d    | ← Medium→Medium |
| PBr↔9/46d  | ← Medium→Medium |
| PBr↔8l     | ← Sparse→Medium |
| PBr↔F7     | ← Medium→Medium |
| STPc↔24c   | ← Sparse→Medium |
| STPc↔8B    | ← Medium→Sparse |
| STPc↔8l    | ← Medium→Strong |
| STPc↔9/46d | ← Medium→Strong |
| STPc↔F5    | ← Medium→Sparse |
| STPc↔TEpd  | ← Medium→Sparse |
| STPi↔8B    | ← Medium→Strong |
| STPi↔8m    | ← Sparse→Strong |
| STPi↔9/46d | ← Medium→Medium |
| STPi↔F7    | ← Sparse→Strong |
| STPr↔46d   | ← Medium→Medium |
| STPr↔8B    | ← Medium→Strong |
| STPr↔8l    | ← Sparse→Medium |
| STPr↔F7    | ← Sparse→Medium |
| STPr↔MT    | ← Sparse→Medium |
| STPr↔STPi  | ← Strong→Strong |
| STPr↔TEO   | ← Sparse→Medium |
| TEpd↔8l    | ← Medium→Medium |
| TEpd↔9/46v | ← Medium→Medium |
| V2↔8l      | ← Medium→Medium |
| V2↔DP      | ← Medium→Strong |
| V2↔TEO     | ← Medium→Strong |
| V4↔7A      | ← Sparse→Medium |
| V4↔DP      | ← Sparse→Strong |
| V4↔STPc    | ← Medium→Medium |
| V4↔STPr    | ← Medium→Sparse |
| V4↔V1      | ← Strong→Strong |

| Symmetrical bidirectional connections |        |
|---------------------------------------|--------|
| A                                     | B      |
| Pathway                               | Weight |
| 2:7A                                  | Sparse |
| 2:7B                                  | Medium |
| 2:9/46v                               | Strong |
| 2:46d                                 | Sparse |
| 2:F5                                  | Strong |
| 2:ProM                                | Strong |
| 5:7B                                  | Strong |
| 5:7m                                  | Medium |
| 5:F1                                  | Strong |
| 5:F2                                  | Strong |
| 7A:7m                                 | Strong |
| 7A:8l                                 | Medium |
| 7A:9/46d                              | Medium |
| 7A:9/46v                              | Strong |
| 7A:DP                                 | Strong |
| 7A:F1                                 | Medium |
| 7A:F2                                 | Medium |
| 7A:MT                                 | Medium |
| 7A:TEO                                | Medium |
| 7A:TEpd                               | Medium |
| 7B:8m                                 | Medium |
| 7B:9/46d                              | Medium |
| 7B:9/46v                              | Strong |
| 7B:F5                                 | Strong |
| 7B:ProM                               | Medium |
| 7m:8l                                 | Medium |
| 7m:9/46d                              | Strong |
| 7m:9/46v                              | Medium |
| 7m:46d                                | Medium |
| 7m:F2                                 | Strong |
| 7m:F5                                 | Sparse |
| 7m:F7                                 | Strong |
| 8B:8m                                 | Strong |
| 8B:9/46d                              | Strong |
| 8B:24c                                | Strong |
| 8B:46d                                | Strong |
| 8B:F2                                 | Medium |
| 8B:F5                                 | Sparse |
| 8B:F7                                 | Strong |
| 8B:PBr                                | Medium |
| 8l:8m                                 | Strong |
| 8l:9/46d                              | Strong |

| <b>Symmetrical bidirectional connections</b> |               |
|----------------------------------------------|---------------|
| <b>A</b>                                     | <b>B</b>      |
| <b>Pathway</b>                               | <b>Weight</b> |
| 8l:10                                        | Medium        |
| 8l:TEO                                       | Medium        |
| 8l:V1                                        | Medium        |
| 8l:V4                                        | Strong        |
| 8m:9/46d                                     | Strong        |
| 8m:9/46v                                     | Strong        |
| 8m:10                                        | Medium        |
| 8m:46d                                       | Strong        |
| 8m:F7                                        | Strong        |
| 8m:MT                                        | Medium        |
| 8m:PBr                                       | Medium        |
| 8m:STPc                                      | Strong        |
| 8m:STPr                                      | Medium        |
| 8m:TEpd                                      | Sparse        |
| 8m:V2                                        | Medium        |
| 9/46d:9/46v                                  | Strong        |
| 9/46d:10                                     | Medium        |
| 9/46d:24c                                    | Medium        |
| 9/46d:46d                                    | Strong        |
| 9/46d:F7                                     | Strong        |
| 9/46d:STPr                                   | Medium        |
| 9/46d:TEO                                    | Sparse        |
| 9/46d:V4                                     | Sparse        |
| 9/46v:10                                     | Medium        |
| 9/46v:F5                                     | Strong        |
| 9/46v:F7                                     | Medium        |
| 9/46v:ProM                                   | Strong        |
| 9/46v:STPr                                   | Medium        |
| 10:46d                                       | Strong        |
| 10:F5                                        | Sparse        |
| 10:F7                                        | Medium        |
| 10:PBr                                       | Strong        |
| 10:STPc                                      | Medium        |
| 10:STPi                                      | Strong        |
| 10:STPr                                      | Strong        |
| 24c:46d                                      | Medium        |
| 24c:F1                                       | Strong        |
| 24c:F2                                       | Strong        |
| 24c:F5                                       | Strong        |
| 24c:F7                                       | Strong        |
| 24c:ProM                                     | Medium        |
| 24c:STPi                                     | Medium        |
| 24c:STPr                                     | Medium        |
| 46d:DP                                       | Medium        |
| 46d:F5                                       | Sparse        |
| 46d:STPc                                     | Medium        |

| 46d:STPi                                           | Strong        |
|----------------------------------------------------|---------------|
| 46d:TEO                                            | Sparse        |
| 46d:TEpd                                           | Sparse        |
| DP:STPc                                            | Medium        |
| DP:STPr                                            | Sparse        |
| DP:TEO                                             | Medium        |
| F1:F2                                              | Strong        |
| F1:F5                                              | Medium        |
| F1:ProM                                            | Medium        |
| F2:F7                                              | Strong        |
| F2:MT                                              | Sparse        |
| F2:ProM                                            | Sparse        |
| F2:STPr                                            | Sparse        |
| F5:TEpd                                            | Sparse        |
| F7:STPc                                            | Medium        |
| F7:TEO                                             | Sparse        |
| MT:STPc                                            | Medium        |
| MT:STPi                                            | Medium        |
| MT:TEO                                             | Strong        |
| MT:V1                                              | Strong        |
| MT:V2                                              | Strong        |
| MT:V4                                              | Strong        |
| PBr:STPc                                           | Strong        |
| PBr:STPi                                           | Strong        |
| PBr:STPr                                           | Strong        |
| STPc:STPi                                          | Strong        |
| STPc:STPr                                          | Strong        |
| STPc:TEO                                           | Medium        |
| STPc:V2                                            | Medium        |
| STPi:TEpd                                          | Medium        |
| STPr:TEpd                                          | Medium        |
| STPr:V2                                            | Sparse        |
| TEO:TEpd                                           | Strong        |
| TEO:V4                                             | Strong        |
| TEpd:V2                                            | Medium        |
| TEpd:V4                                            | Strong        |
| V1:V2                                              | Strong        |
| V2:V4                                              | Strong        |
| <b>True Unidirectional connections<sup>1</sup></b> |               |
| <b>A</b>                                           | <b>B</b>      |
| <b>Pathway</b>                                     | <b>Weight</b> |
| 2 → 8l                                             | Medium        |
| 2 → MT                                             | Sparse        |
| 5 → 24c                                            | Strong        |
| 5 → 8m                                             | Sparse        |
| 5 → 9/46d                                          | Medium        |
| 7A → 24c                                           | Medium        |
| 9/46v → TEO                                        | Medium        |
| 46d → ProM                                         | Sparse        |
| DP → 8l                                            | Medium        |

| F1 → 46d                                               | Sparse        |
|--------------------------------------------------------|---------------|
| F1 → 7B                                                | Medium        |
| F1 → 7m                                                | Medium        |
| F1 → 8l                                                | Medium        |
| F1 → 9/46d                                             | Sparse        |
| PBr → MT                                               | Sparse        |
| ProM → 8l                                              | Medium        |
| ProM → 8m                                              | Medium        |
| ProM → 9/46d                                           | Medium        |
| ProM → F7                                              | Medium        |
| STPc → 9/46v                                           | Medium        |
| STPc → V1                                              | Medium        |
| STPc → F2                                              | Medium        |
| STPi → 7A                                              | Strong        |
| STPi → 7m                                              | Sparse        |
| STPi → 8l                                              | Medium        |
| STPi → DP                                              | Sparse        |
| STPi → F2                                              | Medium        |
| STPi → V1                                              | Medium        |
| STPi → V2                                              | Sparse        |
| STPi → V4                                              | Medium        |
| STPr → 7B                                              | Medium        |
| STPr → 7m                                              | Sparse        |
| TEpd → V1                                              | Medium        |
| TEO → V1                                               | Strong        |
| <b>Inferred Unidirectional connections<sup>2</sup></b> |               |
| <b>A</b>                                               | <b>B</b>      |
| <b>Pathway</b>                                         | <b>Weight</b> |
| 2 → 5                                                  | Strong        |
| 2 → 7m                                                 | Sparse        |
| 2 → 8m                                                 | Sparse        |
| 2 → 9/46d                                              | Sparse        |
| 2 → STPc                                               | Sparse        |
| 2 → TEO                                                | Sparse        |
| 24c → DP                                               | Sparse        |
| 24c → PBr                                              | Medium        |
| 46d → 5                                                | Medium        |
| 5 → 8l                                                 | Sparse        |
| 5 → 9/46v                                              | Sparse        |
| 5 → STPc                                               | Sparse        |
| 5 → TEO                                                | Sparse        |
| 7A → 10                                                | Sparse        |
| 7A → PBr                                               | Sparse        |
| 7A → ProM                                              | Sparse        |
| 7B → 8l                                                | Sparse        |
| 7B → F7                                                | Sparse        |
| 7B → TEO                                               | Sparse        |
| 7m → TEO                                               | Sparse        |
| 8B → TEO                                               | Sparse        |
| 9/46v → MT                                             | Sparse        |

| <b>Inferred Unidirectional connections<sup>2</sup></b> |               |
|--------------------------------------------------------|---------------|
| <b>A</b>                                               | <b>B</b>      |
| <b>Pathway</b>                                         | <b>Weight</b> |
| 9/46v → V4                                             | Sparse        |
| DP → 10                                                | Sparse        |
| DP → PBr                                               | Sparse        |
| F1 → 10                                                | Sparse        |
| F1 → 9/46v                                             | Sparse        |
| F1 → MT                                                | Sparse        |
| F1 → STPr                                              | Sparse        |
| F2 → 10                                                | Sparse        |
| F2 → 46d                                               | Medium        |
| F2 → DP                                                | Medium        |
| F2 → TEO                                               | Sparse        |
| F5 → DP                                                | Sparse        |
| F5 → MT                                                | Sparse        |
| F5 → TEO                                               | Sparse        |
| F7 → DP                                                | Medium        |

|              |        |
|--------------|--------|
| MT → 46d     | Sparse |
| MT → 7B      | Medium |
| MT → 7m      | Medium |
| PBr → 9/46v  | Sparse |
| PBr → F2     | Sparse |
| PBr → F5     | Sparse |
| PBr → TEO    | Sparse |
| PBr → TEpd   | Sparse |
| ProM → MT    | Sparse |
| ProM → PBr   | Sparse |
| ProM → TEO   | Sparse |
| STPc → F1    | Sparse |
| STPi → 5     | Medium |
| STPi → 7B    | Sparse |
| STPi → 9/46v | Medium |
| STPi → F5    | Sparse |
| STPi → TEO   | Medium |
| STPr → F5    | Sparse |
| STPr → V1    | Sparse |

|            |        |
|------------|--------|
| TEpd → 10  | Sparse |
| TEpd → 7m  | Sparse |
| V1 → 7A    | Sparse |
| V1 → 7m    | Sparse |
| V1 → F5    | Sparse |
| V2 → 10    | Sparse |
| V2 → 46d   | Medium |
| V2 → 7A    | Sparse |
| V2 → 7B    | Sparse |
| V2 → 7m    | Medium |
| V2 → 9/46d | Medium |
| V2 → F5    | Sparse |
| V2 → F7    | Sparse |
| V2 → PBr   | Sparse |
| V4 → 7m    | Medium |
| V4 → 8B    | Sparse |
| V4 → 8m    | Medium |
| V4 → PBr   | Sparse |

<sup>1</sup> Cases where unidirectional projections (area X → area Y) where the injection in area X which fails to label area Y is shown to overlap the labelled neurons in area X resulting from injection in area Y (see figure S6)

<sup>2</sup> Cases where unidirectional projections (area X → area Y) where the injection in area X which fails to label area Y is shown to not overlap the labelled neurons in area X resulting from injection in area Y (see figure S6)

Table S5. Dominating sets

‘Targets’ is the dominating set  $D$  size (nr of injected sets).

| A                  | B                  | C     | D     | E     | F      | G      | H       | I       |
|--------------------|--------------------|-------|-------|-------|--------|--------|---------|---------|
| Targets            | 1                  | 2     | 3     | 4     | 5      | 6      | 7       | 8       |
| Nr of sets         | 29                 | 406   | 3654  | 23751 | 118755 | 475020 | 1560780 | 4292145 |
| Dominated size (%) | Percentage of sets |       |       |       |        |        |         |         |
| 0-10               | 0.0                | 0.0   | 0.0   | 0.0   | 0.0    | 0.0    | 0.0     | 0.0     |
| 10-20              | 0.0                | 0.0   | 0.0   | 0.0   | 0.0    | 0.0    | 0.0     | 0.0     |
| 20-30              | 3.45               | 0.0   | 0.0   | 0.0   | 0.0    | 0.0    | 0.0     | 0.0     |
| 30-40              | 17.24              | 0.0   | 0.0   | 0.0   | 0.0    | 0.0    | 0.0     | 0.0     |
| 40-50              | 6.90               | 1.23  | 0.03  | 0.0   | 0.0    | 0.0    | 0.0     | 0.0     |
| 50-60              | 10.34              | 1.23  | 0.11  | 0.0   | 0.0    | 0.0    | 0.0     | 0.0     |
| 60-70              | 31.03              | 8.37  | 0.68  | 0.02  | 0.0    | 0.0    | 0.0     | 0.0     |
| 70-80              | 20.69              | 19.95 | 3.50  | 0.28  | 0.02   | 0.0    | 0.0     | 0.0     |
| 80-90              | 6.90               | 42.36 | 25.12 | 6.33  | 1.05   | 0.12   | 0.01    | 0.0     |
| 90-100             | 3.45               | 26.60 | 68.66 | 85.02 | 78.40  | 63.67  | 47.88   | 34.04   |
| 100                | 0.0                | 0.24  | 1.88  | 8.33  | 20.52  | 36.20  | 52.10   | 65.96   |

**Table S6: FLNe values and Bibliographic analysis**

ENTO: Entorhinal, PERI: Perirhinal, PIRI: Piriform, Pole: Temporal Pole, SUB: Subiculum.

| CASE | MONKEY | SOURCE | TARGET | FLNe     | NEURONS | STATUS | BIBLIOGRAPHY       |
|------|--------|--------|--------|----------|---------|--------|--------------------|
| 1    | M81LH  | V2     | V1     | 7.66e-01 | 86132   | Known  | (1-8)              |
| 1    | M81LH  | V3     | V1     | 8.26e-03 | 929     | Known  | (1-3, 5, 7, 9)     |
| 1    | M81LH  | V3A    | V1     | 1.45e-03 | 163     | Known  | (3, 5)             |
| 1    | M81LH  | V4     | V1     | 1.17e-01 | 13171   | Known  | (1-3, 5, 7, 10-11) |
| 1    | M81LH  | V4t    | V1     | 1.46e-03 | 164     | Known  | (3, 5)             |
| 1    | M81LH  | LIP    | V1     | 1.14e-03 | 128     | Known  | (2, 7)             |
| 1    | M81LH  | PIP    | V1     | 9.96e-04 | 112     | Known  | (3)                |
| 1    | M81LH  | DP     | V1     | 1.78e-04 | 20      | NFP    | NA                 |
| 1    | M81LH  | STPr   | V1     | 2.67e-05 | 3       | NFP    | NA                 |
| 1    | M81LH  | STPi   | V1     | 5.34e-04 | 60      | Known  | (12)               |
| 1    | M81LH  | STPc   | V1     | 1.25e-03 | 141     | Known  | (12)               |
| 1    | M81LH  | PGa    | V1     | 6.94e-04 | 78      | Known  | (7)                |
| 1    | M81LH  | IPa    | V1     | 4.52e-03 | 508     | NFP    | NA                 |
| 1    | M81LH  | FST    | V1     | 4.45e-03 | 500     | Known  | (2, 7)             |
| 1    | M81LH  | MST    | V1     | 1.32e-02 | 1480    | Known  | (7)                |
| 1    | M81LH  | MT     | V1     | 5.95e-02 | 6690    | Known  | (1-3, 5, 7, 13-14) |
| 1    | M81LH  | TEO    | V1     | 7.52e-03 | 846     | Known  | (2, 5, 7, 10)      |
| 1    | M81LH  | TEOm   | V1     | 4.09e-04 | 46      | Known  | (7)                |
| 1    | M81LH  | PERI   | V1     | 4.45e-04 | 50      | Known  | (15)               |
| 1    | M81LH  | TEad   | V1     | 3.56e-05 | 4       | NFP    | NA                 |
| 1    | M81LH  | TEav   | V1     | 2.76e-04 | 31      | NFP    | NA                 |
| 1    | M81LH  | TEpd   | V1     | 1.63e-03 | 183     | Known  | (7)                |
| 1    | M81LH  | TEpv   | V1     | 2.24e-03 | 252     | Known  | (2, 7)             |
| 1    | M81LH  | TEa/ma | V1     | 8.89e-06 | 1       | NFP    | NA                 |
| 1    | M81LH  | TEa/mp | V1     | 2.83e-03 | 318     | Known  | (7)                |
| 1    | M81LH  | TH/TF  | V1     | 3.52e-03 | 396     | Known  | (2, 7)             |
| 1    | M81LH  | MB     | V1     | 8.89e-06 | 1       | Known  | (12)               |
| 1    | M81LH  | LB     | V1     | 3.56e-05 | 4       | Known  | (12)               |
| 1    | M81LH  | PBc    | V1     | 1.42e-04 | 16      | Known  | (12)               |
| 1    | M81LH  | 8l     | V1     | 1.42e-04 | 16      | Known  | (2-3, 15)          |
| 1    | M81LH  | 8r     | V1     | 8.89e-06 | 1       | NFP    | NA                 |
| 2    | M85LH  | V2     | V1     | 7.52e-01 | 105064  | Known  | (1-8)              |
| 2    | M85LH  | V3     | V1     | 6.25e-03 | 873     | Known  | (1-3, 5, 7, 9)     |
| 2    | M85LH  | V3A    | V1     | 1.33e-03 | 186     | Known  | (3, 5)             |
| 2    | M85LH  | V4     | V1     | 9.50e-02 | 13261   | Known  | (1-3, 5, 7, 10-11) |
| 2    | M85LH  | V4t    | V1     | 2.89e-03 | 404     | Known  | (3, 5)             |
| 2    | M85LH  | LIP    | V1     | 8.95e-04 | 125     | Known  | (2, 7)             |
| 2    | M85LH  | PIP    | V1     | 3.01e-04 | 42      | Known  | (3)                |
| 2    | M85LH  | DP     | V1     | 7.88e-04 | 110     | NFP    | NA                 |
| 2    | M85LH  | STPr   | V1     | 5.01e-05 | 7       | NFP    | NA                 |

|   |       |        |    |          |        |       |                    |
|---|-------|--------|----|----------|--------|-------|--------------------|
| 2 | M85LH | STPi   | V1 | 4.87e-04 | 68     | Known | (12)               |
| 2 | M85LH | STPc   | V1 | 1.73e-03 | 241    | Known | (12)               |
| 2 | M85LH | PGa    | V1 | 7.45e-04 | 104    | Known | (7)                |
| 2 | M85LH | IPa    | V1 | 5.44e-04 | 76     | NFP   | NA                 |
| 2 | M85LH | FST    | V1 | 7.68e-03 | 1072   | Known | (2, 7)             |
| 2 | M85LH | MST    | V1 | 4.40e-03 | 614    | Known | (7)                |
| 2 | M85LH | MT     | V1 | 5.21e-02 | 7282   | Known | (1-3, 5, 7, 13-14) |
| 2 | M85LH | TEO    | V1 | 3.89e-02 | 5433   | Known | (2, 5, 7, 10)      |
| 2 | M85LH | TEOm   | V1 | 2.81e-03 | 392    | Known | (7)                |
| 2 | M85LH | PERI   | V1 | 5.57e-03 | 778    | Known | (15)               |
| 2 | M85LH | TEad   | V1 | 2.24e-03 | 313    | NFP   | NA                 |
| 2 | M85LH | TEav   | V1 | 8.59e-04 | 120    | NFP   | NA                 |
| 2 | M85LH | TEpd   | V1 | 5.01e-03 | 699    | Known | (7)                |
| 2 | M85LH | TEpv   | V1 | 7.58e-03 | 1059   | Known | (2, 7)             |
| 2 | M85LH | TEa/ma | V1 | 2.36e-03 | 330    | NFP   | NA                 |
| 2 | M85LH | TEa/mp | V1 | 1.57e-03 | 219    | Known | (7)                |
| 2 | M85LH | TH/TF  | V1 | 5.24e-03 | 732    | Known | (2, 7)             |
| 2 | M85LH | LB     | V1 | 7.16e-05 | 10     | Known | (12)               |
| 2 | M85LH | PBc    | V1 | 1.36e-04 | 19     | Known | (12)               |
| 2 | M85LH | 8l     | V1 | 1.22e-04 | 17     | Known | (2-3, 15)          |
| 3 | M85RH | V2     | V1 | 7.08e-01 | 141303 | Known | (1-8)              |
| 3 | M85RH | V3     | V1 | 6.82e-03 | 1361   | Known | (1-3, 5, 7, 9)     |
| 3 | M85RH | V3A    | V1 | 1.57e-03 | 314    | Known | (3, 5)             |
| 3 | M85RH | V4     | V1 | 1.51e-01 | 30128  | Known | (1-3, 5, 7, 10-11) |
| 3 | M85RH | V4t    | V1 | 1.72e-03 | 344    | Known | (3, 5)             |
| 3 | M85RH | LIP    | V1 | 9.52e-04 | 190    | Known | (2, 7)             |
| 3 | M85RH | PIP    | V1 | 5.76e-04 | 115    | Known | (3)                |
| 3 | M85RH | DP     | V1 | 5.06e-04 | 101    | NFP   | NA                 |
| 3 | M85RH | STPr   | V1 | 2.00e-05 | 4      | NFP   | NA                 |
| 3 | M85RH | STPi   | V1 | 7.87e-04 | 157    | Known | (12)               |
| 3 | M85RH | STPc   | V1 | 1.94e-03 | 387    | Known | (12)               |
| 3 | M85RH | PGa    | V1 | 1.05e-03 | 210    | Known | (7)                |
| 3 | M85RH | IPa    | V1 | 6.21e-04 | 124    | NFP   | NA                 |
| 3 | M85RH | FST    | V1 | 8.68e-03 | 1732   | Known | (2, 7)             |
| 3 | M85RH | MST    | V1 | 6.50e-03 | 1298   | Known | (7)                |
| 3 | M85RH | MT     | V1 | 5.23e-02 | 10444  | Known | (1-3, 5, 7, 13-14) |
| 3 | M85RH | TEO    | V1 | 3.82e-02 | 7622   | Known | (2, 5, 7, 10)      |
| 3 | M85RH | TEOm   | V1 | 2.20e-04 | 44     | Known | (7)                |
| 3 | M85RH | PERI   | V1 | 1.18e-03 | 235    | Known | (15)               |
| 3 | M85RH | TEad   | V1 | 1.50e-03 | 300    | NFP   | NA                 |
| 3 | M85RH | TEav   | V1 | 1.45e-03 | 289    | NFP   | NA                 |
| 3 | M85RH | TEpd   | V1 | 4.07e-03 | 813    | Known | (7)                |
| 3 | M85RH | TEpv   | V1 | 3.48e-03 | 695    | Known | (2, 7)             |
| 3 | M85RH | TEa/ma | V1 | 7.27e-04 | 145    | NFP   | NA                 |
| 3 | M85RH | TEa/mp | V1 | 1.72e-03 | 343    | Known | (7)                |



|   |        |        |    |          |       |       |                    |
|---|--------|--------|----|----------|-------|-------|--------------------|
| 3 | M85RH  | TH/TF  | V1 | 3.48e-03 | 694   | Known | (2, 7)             |
| 3 | M85RH  | CORE   | V1 | 1.55e-04 | 31    | Known | (12)               |
| 3 | M85RH  | MB     | V1 | 1.25e-04 | 25    | Known | (12)               |
| 3 | M85RH  | LB     | V1 | 1.00e-04 | 20    | Known | (12)               |
| 3 | M85RH  | PBc    | V1 | 1.60e-04 | 32    | Known | (12)               |
| 3 | M85RH  | 8l     | V1 | 3.26e-04 | 65    | Known | (2-3, 15)          |
| 4 | M88RH  | V2     | V1 | 7.51e-01 | 27362 | Known | (1-8)              |
| 4 | M88RH  | V3     | V1 | 3.73e-03 | 136   | Known | (1-3, 5, 7, 9)     |
| 4 | M88RH  | V3A    | V1 | 5.22e-03 | 190   | Known | (3, 5)             |
| 4 | M88RH  | V4     | V1 | 7.16e-02 | 2606  | Known | (1-3, 5, 7, 10-11) |
| 4 | M88RH  | V4t    | V1 | 4.06e-03 | 148   | Known | (3, 5)             |
| 4 | M88RH  | 7op    | V1 | 3.30e-04 | 12    | NFP   | NA                 |
| 4 | M88RH  | LIP    | V1 | 1.54e-03 | 56    | Known | (2, 7)             |
| 4 | M88RH  | PIP    | V1 | 1.10e-04 | 4     | Known | (3)                |
| 4 | M88RH  | DP     | V1 | 7.96e-04 | 29    | NFP   | NA                 |
| 4 | M88RH  | STPi   | V1 | 2.20e-04 | 8     | Known | (12)               |
| 4 | M88RH  | STPc   | V1 | 1.78e-03 | 65    | Known | (12)               |
| 4 | M88RH  | TPt    | V1 | 1.10e-04 | 4     | NFP   | NA                 |
| 4 | M88RH  | PGa    | V1 | 8.51e-04 | 31    | Known | (7)                |
| 4 | M88RH  | IPa    | V1 | 3.30e-04 | 12    | NFP   | NA                 |
| 4 | M88RH  | FST    | V1 | 1.01e-02 | 368   | Known | (2, 7)             |
| 4 | M88RH  | MST    | V1 | 6.89e-03 | 251   | Known | (7)                |
| 4 | M88RH  | MT     | V1 | 7.83e-02 | 2850  | Known | (1-3, 5, 7, 13-14) |
| 4 | M88RH  | TEO    | V1 | 2.57e-02 | 935   | Known | (2, 5, 7, 10)      |
| 4 | M88RH  | TEOm   | V1 | 5.82e-03 | 212   | Known | (7)                |
| 4 | M88RH  | PERI   | V1 | 9.89e-04 | 36    | Known | (15)               |
| 4 | M88RH  | TEad   | V1 | 5.49e-04 | 20    | NFP   | NA                 |
| 4 | M88RH  | TEav   | V1 | 2.28e-03 | 83    | NFP   | NA                 |
| 4 | M88RH  | TEpd   | V1 | 6.15e-03 | 224   | Known | (7)                |
| 4 | M88RH  | TEpv   | V1 | 1.15e-02 | 420   | Known | (2, 7)             |
| 4 | M88RH  | TEa/ma | V1 | 2.20e-04 | 8     | NFP   | NA                 |
| 4 | M88RH  | TEa/mp | V1 | 2.75e-03 | 100   | Known | (7)                |
| 4 | M88RH  | TH/TF  | V1 | 6.26e-03 | 228   | Known | (2, 7)             |
| 4 | M88RH  | CORE   | V1 | 5.49e-05 | 2     | Known | (12)               |
| 4 | M88RH  | MB     | V1 | 5.49e-05 | 2     | Known | (12)               |
| 4 | M88RH  | LB     | V1 | 1.10e-04 | 4     | Known | (12)               |
| 4 | M88RH  | PBc    | V1 | 1.10e-04 | 4     | Known | (12)               |
| 4 | M88RH  | 8l     | V1 | 1.65e-04 | 6     | Known | (2-3, 15)          |
| 5 | M121RH | V2     | V1 | 6.83e-01 | 66489 | Known | (1-8)              |
| 5 | M121RH | V3     | V1 | 9.48e-03 | 922   | Known | (1-3, 5, 7, 9)     |
| 5 | M121RH | V3A    | V1 | 1.34e-03 | 130   | Known | (3, 5)             |
| 5 | M121RH | V4     | V1 | 2.04e-01 | 19832 | Known | (1-3, 5, 7, 10-11) |
| 5 | M121RH | V4t    | V1 | 6.99e-04 | 68    | Known | (3, 5)             |
| 5 | M121RH | LIP    | V1 | 1.91e-03 | 186   | Known | (2, 7)             |
| 5 | M121RH | PIP    | V1 | 2.26e-03 | 220   | Known | (3)                |

|   |        |        |    |          |        |       |                             |
|---|--------|--------|----|----------|--------|-------|-----------------------------|
| 5 | M121RH | DP     | V1 | 1.85e-04 | 18     | NFP   | NA                          |
| 5 | M121RH | STPi   | V1 | 1.34e-04 | 13     | Known | (12)                        |
| 5 | M121RH | STPc   | V1 | 1.56e-03 | 152    | Known | (12)                        |
| 5 | M121RH | PGa    | V1 | 3.29e-04 | 32     | Known | (7)                         |
| 5 | M121RH | IPa    | V1 | 1.44e-04 | 14     | NFP   | NA                          |
| 5 | M121RH | FST    | V1 | 6.74e-03 | 656    | Known | (2, 7)                      |
| 5 | M121RH | MST    | V1 | 1.91e-03 | 186    | Known | (7)                         |
| 5 | M121RH | MT     | V1 | 5.20e-02 | 5057   | Known | (1-3, 5, 7, 13-14)          |
| 5 | M121RH | TEO    | V1 | 2.48e-02 | 2418   | Known | (2, 5, 7, 10)               |
| 5 | M121RH | TEOm   | V1 | 3.60e-04 | 35     | Known | (7)                         |
| 5 | M121RH | PERI   | V1 | 6.17e-04 | 60     | Known | (15)                        |
| 5 | M121RH | TEad   | V1 | 5.14e-05 | 5      | NFP   | NA                          |
| 5 | M121RH | TEav   | V1 | 4.52e-04 | 44     | NFP   | NA                          |
| 5 | M121RH | TEpd   | V1 | 1.29e-03 | 126    | Known | (7)                         |
| 5 | M121RH | TEpv   | V1 | 2.20e-03 | 214    | Known | (2, 7)                      |
| 5 | M121RH | TEa/ma | V1 | 2.26e-04 | 22     | NFP   | NA                          |
| 5 | M121RH | TEa/mp | V1 | 2.48e-03 | 241    | Known | (7)                         |
| 5 | M121RH | TH/TF  | V1 | 1.37e-03 | 133    | Known | (2, 7)                      |
| 5 | M121RH | PBc    | V1 | 2.06e-05 | 2      | Known | (12)                        |
| 5 | M121RH | 8l     | V1 | 3.19e-04 | 31     | Known | (2-3, 15)                   |
| 6 | M101LH | V1     | V2 | 7.33e-01 | 262279 | Known | (1, 3, 6, 16)               |
| 6 | M101LH | V3     | V2 | 3.99e-02 | 14301  | Known | (1, 3, 6-7, 9, 16)          |
| 6 | M101LH | V3A    | V2 | 1.11e-03 | 399    | Known | (3, 16)                     |
| 6 | M101LH | V4     | V2 | 1.74e-01 | 62257  | Known | (1, 3, 7, 10-11, 16)        |
| 6 | M101LH | V4t    | V2 | 7.32e-04 | 262    | Known | (16-17)                     |
| 6 | M101LH | LIP    | V2 | 8.80e-04 | 315    | Known | (7, 16, 18)                 |
| 6 | M101LH | VIP    | V2 | 2.46e-04 | 88     | NFP   | NA                          |
| 6 | M101LH | PIP    | V2 | 5.75e-04 | 206    | Known | (16)                        |
| 6 | M101LH | DP     | V2 | 4.02e-04 | 144    | Known | (16)                        |
| 6 | M101LH | V6A    | V2 | 3.91e-05 | 14     | NFP   | NA                          |
| 6 | M101LH | STPi   | V2 | 2.51e-05 | 9      | NFP   | NA                          |
| 6 | M101LH | STPc   | V2 | 9.50e-05 | 34     | Known | (17, 19)                    |
| 6 | M101LH | TPt    | V2 | 2.79e-06 | 1      | NFP   | NA                          |
| 6 | M101LH | PGa    | V2 | 1.06e-04 | 38     | Known | (7, 17)                     |
| 6 | M101LH | IPa    | V2 | 7.54e-05 | 27     | NFP   | NA                          |
| 6 | M101LH | FST    | V2 | 2.25e-03 | 807    | Known | (3, 16-17)                  |
| 6 | M101LH | MST    | V2 | 7.85e-04 | 281    | Known | (3, 16-17, 20)              |
| 6 | M101LH | MT     | V2 | 3.65e-02 | 13074  | Known | (1, 3, 7, 13-14, 16-17, 20) |
| 6 | M101LH | TEO    | V2 | 3.73e-03 | 1337   | Known | (7, 10, 16-17, 21)          |
| 6 | M101LH | TEOm   | V2 | 2.12e-03 | 759    | Known | (7, 17)                     |
| 6 | M101LH | PERI   | V2 | 8.38e-05 | 30     | NFP   | NA                          |
| 6 | M101LH | TEad   | V2 | 5.31e-05 | 19     | NFP   | NA                          |
| 6 | M101LH | TEav   | V2 | 4.75e-05 | 17     | NFP   | NA                          |
| 6 | M101LH | TEpd   | V2 | 7.96e-04 | 285    | NFP   | NA                          |
| 6 | M101LH | TEpv   | V2 | 8.21e-04 | 294    | Known | (7)                         |

|   |        |        |    |          |        |       |                             |
|---|--------|--------|----|----------|--------|-------|-----------------------------|
| 6 | M101LH | TEa/ma | V2 | 2.79e-06 | 1      | Known | (17)                        |
| 6 | M101LH | TEa/mp | V2 | 6.14e-05 | 22     | Known | (7, 17)                     |
| 6 | M101LH | TH/TF  | V2 | 1.97e-03 | 705    | Known | (7)                         |
| 6 | M101LH | MB     | V2 | 8.38e-06 | 3      | NFP   | NA                          |
| 6 | M101LH | 8l     | V2 | 8.94e-05 | 32     | NFP   | NA                          |
| 6 | M101LH | 8m     | V2 | 1.68e-05 | 6      | NFP   | NA                          |
| 7 | M101RH | V1     | V2 | 7.83e-01 | 191313 | Known | (1, 3, 6, 16)               |
| 7 | M101RH | V3     | V2 | 4.33e-02 | 10590  | Known | (1, 3, 6-7, 9, 16)          |
| 7 | M101RH | V3A    | V2 | 3.76e-03 | 918    | Known | (3, 16)                     |
| 7 | M101RH | V4     | V2 | 1.10e-01 | 26919  | Known | (1, 3, 7, 10-11, 16)        |
| 7 | M101RH | V4t    | V2 | 8.80e-04 | 215    | Known | (16-17)                     |
| 7 | M101RH | LIP    | V2 | 1.49e-03 | 363    | Known | (7, 16, 18)                 |
| 7 | M101RH | VIP    | V2 | 9.41e-05 | 23     | NFP   | NA                          |
| 7 | M101RH | PIP    | V2 | 2.90e-04 | 71     | Known | (16)                        |
| 7 | M101RH | DP     | V2 | 8.35e-04 | 204    | Known | (16)                        |
| 7 | M101RH | V6A    | V2 | 2.05e-05 | 5      | NFP   | NA                          |
| 7 | M101RH | STPi   | V2 | 8.18e-05 | 20     | NFP   | NA                          |
| 7 | M101RH | STPc   | V2 | 8.18e-05 | 20     | Known | (17, 19)                    |
| 7 | M101RH | PGa    | V2 | 3.27e-05 | 8      | Known | (7, 17)                     |
| 7 | M101RH | IPa    | V2 | 8.18e-06 | 2      | NFP   | NA                          |
| 7 | M101RH | FST    | V2 | 2.38e-03 | 582    | Known | (3, 16-17)                  |
| 7 | M101RH | MST    | V2 | 1.21e-03 | 295    | Known | (3, 16-17, 20)              |
| 7 | M101RH | MT     | V2 | 4.08e-02 | 9973   | Known | (1, 3, 7, 13-14, 16-17, 20) |
| 7 | M101RH | TEO    | V2 | 5.00e-03 | 1222   | Known | (7, 10, 16-17, 21)          |
| 7 | M101RH | TEOm   | V2 | 2.08e-03 | 509    | Known | (7, 17)                     |
| 7 | M101RH | PERI   | V2 | 1.02e-04 | 25     | NFP   | NA                          |
| 7 | M101RH | TEad   | V2 | 2.86e-05 | 7      | NFP   | NA                          |
| 7 | M101RH | TEav   | V2 | 4.09e-05 | 10     | NFP   | NA                          |
| 7 | M101RH | TEpd   | V2 | 6.05e-04 | 148    | NFP   | NA                          |
| 7 | M101RH | TEpv   | V2 | 1.46e-03 | 358    | Known | (7)                         |
| 7 | M101RH | TEa/ma | V2 | 1.64e-05 | 4      | Known | (17)                        |
| 7 | M101RH | TEa/mp | V2 | 1.55e-04 | 38     | Known | (7, 17)                     |
| 7 | M101RH | TH/TF  | V2 | 2.26e-03 | 553    | Known | (7)                         |
| 7 | M101RH | MB     | V2 | 4.09e-06 | 1      | NFP   | NA                          |
| 7 | M101RH | 8l     | V2 | 1.15e-04 | 28     | NFP   | NA                          |
| 7 | M101RH | 8m     | V2 | 5.73e-05 | 14     | NFP   | NA                          |
| 8 | M103LH | V1     | V2 | 7.75e-01 | 145246 | Known | (1, 3, 6, 16)               |
| 8 | M103LH | V3     | V2 | 1.04e-02 | 1957   | Known | (1, 3, 6-7, 9, 16)          |
| 8 | M103LH | V3A    | V2 | 9.24e-04 | 173    | Known | (3, 16)                     |
| 8 | M103LH | V4     | V2 | 1.70e-01 | 31838  | Known | (1, 3, 7, 10-11, 16)        |
| 8 | M103LH | V4t    | V2 | 1.86e-03 | 349    | Known | (16-17)                     |
| 8 | M103LH | LIP    | V2 | 4.97e-04 | 93     | Known | (7, 16, 18)                 |
| 8 | M103LH | VIP    | V2 | 5.87e-05 | 11     | NFP   | NA                          |
| 8 | M103LH | PIP    | V2 | 4.43e-04 | 83     | Known | (16)                        |
| 8 | M103LH | DP     | V2 | 2.67e-05 | 5      | Known | (16)                        |

|   |        |        |    |          |       |       |                             |
|---|--------|--------|----|----------|-------|-------|-----------------------------|
| 8 | M103LH | V6     | V2 | 1.60e-05 | 3     | NFP   | NA                          |
| 8 | M103LH | V6A    | V2 | 2.14e-05 | 4     | NFP   | NA                          |
| 8 | M103LH | STPr   | V2 | 2.67e-05 | 5     | Known | (17)                        |
| 8 | M103LH | STPi   | V2 | 1.01e-04 | 19    | NFP   | NA                          |
| 8 | M103LH | STPc   | V2 | 8.54e-05 | 16    | Known | (17, 19)                    |
| 8 | M103LH | PGa    | V2 | 3.10e-04 | 58    | Known | (7, 17)                     |
| 8 | M103LH | IPa    | V2 | 1.07e-04 | 20    | NFP   | NA                          |
| 8 | M103LH | FST    | V2 | 1.58e-03 | 296   | Known | (3, 16-17)                  |
| 8 | M103LH | MST    | V2 | 2.46e-04 | 46    | Known | (3, 16-17, 20)              |
| 8 | M103LH | MT     | V2 | 2.99e-02 | 5596  | Known | (1, 3, 7, 13-14, 16-17, 20) |
| 8 | M103LH | TEO    | V2 | 1.09e-03 | 204   | Known | (7, 10, 16-17, 21)          |
| 8 | M103LH | TEOm   | V2 | 8.54e-04 | 160   | Known | (7, 17)                     |
| 8 | M103LH | PERI   | V2 | 4.27e-04 | 80    | NFP   | NA                          |
| 8 | M103LH | TEad   | V2 | 4.27e-04 | 80    | NFP   | NA                          |
| 8 | M103LH | TEav   | V2 | 6.25e-04 | 117   | NFP   | NA                          |
| 8 | M103LH | TEpd   | V2 | 1.76e-03 | 329   | NFP   | NA                          |
| 8 | M103LH | TEpv   | V2 | 1.16e-03 | 217   | Known | (7)                         |
| 8 | M103LH | TEa/ma | V2 | 1.55e-04 | 29    | Known | (17)                        |
| 8 | M103LH | TEa/mp | V2 | 1.01e-04 | 19    | Known | (7, 17)                     |
| 8 | M103LH | TH/TF  | V2 | 1.15e-03 | 215   | Known | (7)                         |
| 8 | M103LH | MB     | V2 | 1.60e-05 | 3     | NFP   | NA                          |
| 8 | M103LH | PBc    | V2 | 5.34e-06 | 1     | NFP   | NA                          |
| 8 | M103LH | 8l     | V2 | 1.23e-04 | 23    | NFP   | NA                          |
| 9 | M121RH | V1     | V4 | 8.21e-03 | 1134  | Known | (2-3, 11, 23)               |
| 9 | M121RH | V2     | V4 | 3.46e-01 | 47725 | Known | (2-4, 11, 23)               |
| 9 | M121RH | V3     | V4 | 4.40e-02 | 6082  | Known | (2-3, 9, 11, 17, 23)        |
| 9 | M121RH | V3A    | V4 | 7.24e-05 | 10    | Known | (2-3, 11)                   |
| 9 | M121RH | V4t    | V4 | 8.39e-02 | 11588 | Known | (3, 11)                     |
| 9 | M121RH | 7A     | V4 | 1.67e-04 | 23    | Known | (11)                        |
| 9 | M121RH | LIP    | V4 | 3.70e-03 | 511   | Known | (2-3, 11, 17, 24)           |
| 9 | M121RH | PIP    | V4 | 4.42e-04 | 61    | Known | (3, 11)                     |
| 9 | M121RH | DP     | V4 | 1.52e-04 | 21    | Known | (3, 11)                     |
| 9 | M121RH | STPr   | V4 | 1.96e-04 | 27    | NFP   | NA                          |
| 9 | M121RH | STPi   | V4 | 7.97e-05 | 11    | NFP   | NA                          |
| 9 | M121RH | STPc   | V4 | 1.30e-04 | 18    | NFP   | NA                          |
| 9 | M121RH | PGa    | V4 | 4.71e-04 | 65    | NFP   | NA                          |
| 9 | M121RH | IPa    | V4 | 6.16e-04 | 85    | NFP   | NA                          |
| 9 | M121RH | FST    | V4 | 1.04e-02 | 1442  | Known | (2-3, 11, 20, 23)           |
| 9 | M121RH | MST    | V4 | 1.74e-04 | 24    | NFP   | NA                          |
| 9 | M121RH | MT     | V4 | 6.70e-02 | 9254  | Known | (2-3, 11, 13, 19, 23)       |
| 9 | M121RH | TEO    | V4 | 2.37e-01 | 32701 | Known | (2-3, 10-11, 21, 23)        |
| 9 | M121RH | TEOm   | V4 | 2.22e-02 | 3062  | Known | (3, 11, 19, 23)             |
| 9 | M121RH | PERI   | V4 | 8.42e-03 | 1162  | Known | (25)                        |
| 9 | M121RH | TEad   | V4 | 2.52e-03 | 348   | Known | (2, 11)                     |
| 9 | M121RH | TEav   | V4 | 1.24e-02 | 1711  | Known | (11)                        |

|    |        |        |     |          |       |       |                       |
|----|--------|--------|-----|----------|-------|-------|-----------------------|
| 9  | M121RH | TEpd   | V4  | 7.42e-02 | 10249 | Known | (2, 11, 23)           |
| 9  | M121RH | TEpv   | V4  | 1.72e-02 | 2380  | Known | (2, 11, 23)           |
| 9  | M121RH | TEa/ma | V4  | 7.10e-03 | 981   | Known | (2, 11)               |
| 9  | M121RH | TEa/mp | V4  | 3.53e-02 | 4878  | Known | (11, 23)              |
| 9  | M121RH | ENTO   | V4  | 6.52e-05 | 9     | NFP   | NA                    |
| 9  | M121RH | TH/TF  | V4  | 1.51e-02 | 2083  | Known | (2-3, 11, 25)         |
| 9  | M121RH | INSULA | V4  | 8.69e-05 | 12    | NFP   | NA                    |
| 9  | M121RH | 9/46d  | V4  | 7.24e-06 | 1     | NFP   | NA                    |
| 9  | M121RH | 8l     | V4  | 2.85e-03 | 393   | Known | (2, 11, 22)           |
| 9  | M121RH | 8r     | V4  | 1.38e-04 | 19    | Known | (11)                  |
| 9  | M121RH | 45B    | V4  | 2.90e-05 | 4     | NFP   | NA                    |
| 10 | M123LH | V1     | V4  | 1.79e-02 | 1673  | Known | (2-3, 11, 23)         |
| 10 | M123LH | V2     | V4  | 4.36e-01 | 40739 | Known | (2-4, 11, 23)         |
| 10 | M123LH | V3     | V4  | 1.49e-02 | 1392  | Known | (2-3, 9, 11, 17, 23)  |
| 10 | M123LH | V3A    | V4  | 1.50e-04 | 14    | Known | (2-3, 11)             |
| 10 | M123LH | V4t    | V4  | 4.02e-03 | 376   | Known | (3, 11)               |
| 10 | M123LH | 7A     | V4  | 4.28e-05 | 4     | Known | (11)                  |
| 10 | M123LH | LIP    | V4  | 1.63e-03 | 152   | Known | (2-3, 11, 17, 24)     |
| 10 | M123LH | PIP    | V4  | 8.55e-04 | 80    | Known | (3, 11)               |
| 10 | M123LH | DP     | V4  | 4.28e-05 | 4     | Known | (3, 11)               |
| 10 | M123LH | STPr   | V4  | 2.89e-04 | 27    | NFP   | NA                    |
| 10 | M123LH | STPi   | V4  | 3.85e-04 | 36    | NFP   | NA                    |
| 10 | M123LH | STPc   | V4  | 8.55e-05 | 8     | NFP   | NA                    |
| 10 | M123LH | PGa    | V4  | 7.70e-04 | 72    | NFP   | NA                    |
| 10 | M123LH | IPa    | V4  | 1.92e-03 | 180   | NFP   | NA                    |
| 10 | M123LH | FST    | V4  | 1.46e-02 | 1369  | Known | (2-3, 11, 20, 23)     |
| 10 | M123LH | MST    | V4  | 8.55e-05 | 8     | NFP   | NA                    |
| 10 | M123LH | MT     | V4  | 1.02e-01 | 9572  | Known | (2-3, 11, 13, 19, 23) |
| 10 | M123LH | TEO    | V4  | 2.39e-01 | 22341 | Known | (2-3, 10-11, 21, 23)  |
| 10 | M123LH | TEOm   | V4  | 1.04e-02 | 971   | Known | (3, 11, 19, 23)       |
| 10 | M123LH | PERI   | V4  | 6.62e-03 | 619   | Known | (25)                  |
| 10 | M123LH | TEad   | V4  | 3.75e-03 | 351   | Known | (2, 11)               |
| 10 | M123LH | TEav   | V4  | 2.74e-03 | 256   | Known | (11)                  |
| 10 | M123LH | TEpd   | V4  | 7.55e-02 | 7064  | Known | (2, 11, 23)           |
| 10 | M123LH | TEpv   | V4  | 3.74e-02 | 3496  | Known | (2, 11, 23)           |
| 10 | M123LH | TEa/ma | V4  | 3.81e-03 | 356   | Known | (2, 11)               |
| 10 | M123LH | TEa/mp | V4  | 9.58e-03 | 896   | Known | (11, 23)              |
| 10 | M123LH | ENTO   | V4  | 6.42e-05 | 6     | NFP   | NA                    |
| 10 | M123LH | TH/TF  | V4  | 1.34e-02 | 1252  | Known | (2-3, 11, 25)         |
| 10 | M123LH | LB     | V4  | 2.14e-05 | 2     | NFP   | NA                    |
| 10 | M123LH | INSULA | V4  | 5.35e-05 | 5     | NFP   | NA                    |
| 10 | M123LH | 9/46v  | V4  | 3.21e-05 | 3     | NFP   | NA                    |
| 10 | M123LH | 8l     | V4  | 1.99e-03 | 186   | Known | (2, 11, 22)           |
| 10 | M123LH | 45B    | V4  | 4.28e-05 | 4     | NFP   | NA                    |
| 11 | M119LH | V2     | TEO | 2.43e-02 | 3782  | Known | (4, 17, 21, 26-27)    |

|    |        |            |     |          |       |       |                        |
|----|--------|------------|-----|----------|-------|-------|------------------------|
| 11 | M119LH | V3         | TEO | 1.23e-01 | 19116 | Known | (17, 21, 23, 26-27)    |
| 11 | M119LH | V3A        | TEO | 4.94e-04 | 77    | Known | (17, 21, 26-28)        |
| 11 | M119LH | V4         | TEO | 2.56e-01 | 39911 | Known | (3, 17, 21, 23, 26-27) |
| 11 | M119LH | V4t        | TEO | 5.87e-03 | 915   | Known | (17, 21, 27)           |
| 11 | M119LH | 7A         | TEO | 4.62e-04 | 72    | Known | (21, 28-29)            |
| 11 | M119LH | 7B         | TEO | 2.57e-05 | 4     | Known | (30)                   |
| 11 | M119LH | LIP        | TEO | 7.90e-03 | 1232  | Known | (17, 21, 24, 28)       |
| 11 | M119LH | MIP        | TEO | 1.92e-05 | 3     | NFP   | NA                     |
| 11 | M119LH | PIP        | TEO | 1.71e-03 | 267   | NFP   | NA                     |
| 11 | M119LH | DP         | TEO | 1.17e-03 | 182   | Known | (17, 21)               |
| 11 | M119LH | 5          | TEO | 2.57e-05 | 4     | NFP   | NA                     |
| 11 | M119LH | 7m         | TEO | 5.13e-05 | 8     | NFP   | NA                     |
| 11 | M119LH | STPr       | TEO | 1.31e-03 | 205   | Known | (21)                   |
| 11 | M119LH | STPi       | TEO | 1.28e-04 | 20    | Known | (21)                   |
| 11 | M119LH | STPc       | TEO | 1.92e-05 | 3     | Known | (21)                   |
| 11 | M119LH | PGa        | TEO | 4.55e-03 | 709   | Known | (17, 26-27, 31)        |
| 11 | M119LH | IPa        | TEO | 5.59e-03 | 871   | Known | (17, 21, 26-27)        |
| 11 | M119LH | FST        | TEO | 6.98e-02 | 10878 | Known | (17, 21, 23, 27, 31)   |
| 11 | M119LH | MST        | TEO | 5.84e-04 | 91    | Known | (17, 21)               |
| 11 | M119LH | MT         | TEO | 2.44e-02 | 3805  | Known | (21)                   |
| 11 | M119LH | TEOm       | TEO | 4.03e-02 | 6291  | Known | (17, 19, 21, 26, 31)   |
| 11 | M119LH | PERI       | TEO | 1.75e-02 | 2731  | Known | (21, 25, 31)           |
| 11 | M119LH | TEad       | TEO | 8.81e-03 | 1373  | Known | (21, 26, 31-32)        |
| 11 | M119LH | TEav       | TEO | 1.56e-02 | 2437  | Known | (21, 31-32)            |
| 11 | M119LH | TEpd       | TEO | 2.31e-01 | 36077 | Known | (21, 23, 26, 31)       |
| 11 | M119LH | TEpv       | TEO | 9.08e-02 | 14153 | Known | (21, 23, 31)           |
| 11 | M119LH | TEa/ma     | TEO | 1.57e-02 | 2441  | Known | (17, 21, 26, 31)       |
| 11 | M119LH | TEa/mp     | TEO | 2.95e-02 | 4599  | Known | (17, 21, 23, 26, 31)   |
| 11 | M119LH | ENTO       | TEO | 2.57e-05 | 4     | NFP   | NA                     |
| 11 | M119LH | TH/TF      | TEO | 1.46e-02 | 2276  | Known | (21, 23, 25, 31)       |
| 11 | M119LH | POLE       | TEO | 2.89e-04 | 45    | Known | (21, 31)               |
| 11 | M119LH | MB         | TEO | 3.85e-05 | 6     | NFP   | NA                     |
| 11 | M119LH | LB         | TEO | 1.28e-05 | 2     | NFP   | NA                     |
| 11 | M119LH | PBr        | TEO | 5.13e-05 | 8     | NFP   | NA                     |
| 11 | M119LH | PBe        | TEO | 7.70e-05 | 12    | NFP   | NA                     |
| 11 | M119LH | Parainsula | TEO | 4.49e-05 | 7     | NFP   | NA                     |
| 11 | M119LH | INSULA     | TEO | 1.28e-04 | 20    | NFP   | NA                     |
| 11 | M119LH | 1          | TEO | 2.57e-05 | 4     | NFP   | NA                     |
| 11 | M119LH | 2          | TEO | 3.85e-05 | 6     | NFP   | NA                     |
| 11 | M119LH | 3          | TEO | 1.22e-04 | 19    | NFP   | NA                     |
| 11 | M119LH | 23         | TEO | 1.28e-05 | 2     | NFP   | NA                     |
| 11 | M119LH | 24a        | TEO | 7.70e-05 | 12    | NFP   | NA                     |
| 11 | M119LH | 24b        | TEO | 3.85e-05 | 6     | NFP   | NA                     |
| 11 | M119LH | 24d        | TEO | 1.92e-05 | 3     | NFP   | NA                     |
| 11 | M119LH | F2         | TEO | 6.41e-06 | 1     | NFP   | NA                     |

|    |        |         |       |          |      |       |                 |
|----|--------|---------|-------|----------|------|-------|-----------------|
| 11 | M119LH | F7      | TEO   | 4.49e-05 | 7    | NFP   | NA              |
| 11 | M119LH | F5      | TEO   | 3.85e-05 | 6    | NFP   | NA              |
| 11 | M119LH | ProM    | TEO   | 1.28e-05 | 2    | NFP   | NA              |
| 11 | M119LH | 46d     | TEO   | 1.28e-05 | 2    | NFP   | NA              |
| 11 | M119LH | 46v     | TEO   | 3.85e-05 | 6    | Known | (28)            |
| 11 | M119LH | 9/46d   | TEO   | 2.57e-05 | 4    | NFP   | NA              |
| 11 | M119LH | 9/46v   | TEO   | 3.91e-04 | 61   | Known | (28)            |
| 11 | M119LH | 8B      | TEO   | 1.28e-05 | 2    | Known | (21)            |
| 11 | M119LH | 8l      | TEO   | 6.08e-03 | 948  | Known | (21-22, 28, 33) |
| 11 | M119LH | 8r      | TEO   | 5.39e-04 | 84   | Known | (21, 28)        |
| 11 | M119LH | 45B     | TEO   | 4.17e-04 | 65   | Known | (28, 33)        |
| 11 | M119LH | 45A     | TEO   | 1.92e-05 | 3    | Known | (26)            |
| 11 | M119LH | 44      | TEO   | 1.28e-05 | 2    | NFP   | NA              |
| 11 | M119LH | 11      | TEO   | 1.28e-05 | 2    | NFP   | NA              |
| 11 | M119LH | 12      | TEO   | 2.37e-04 | 37   | Known | (28)            |
| 12 | M106LH | V2      | 9/46d | 1.78e-03 | 458  | Known | (34)            |
| 12 | M106LH | V3      | 9/46d | 4.66e-05 | 12   | NFP   | NA              |
| 12 | M106LH | V4      | 9/46d | 8.55e-05 | 22   | NFP   | NA              |
| 12 | M106LH | Pro.St. | 9/46d | 2.10e-04 | 54   | Known | (34)            |
| 12 | M106LH | 7op     | 9/46d | 8.32e-04 | 214  | Known | (35)            |
| 12 | M106LH | 7A      | 9/46d | 7.31e-04 | 188  | Known | (34, 36)        |
| 12 | M106LH | 7B      | 9/46d | 1.11e-03 | 286  | Known | (36)            |
| 12 | M106LH | LIP     | 9/46d | 2.43e-03 | 626  | Known | (24)            |
| 12 | M106LH | VIP     | 9/46d | 7.62e-04 | 196  | NFP   | NA              |
| 12 | M106LH | MIP     | 9/46d | 1.63e-04 | 42   | NFP   | NA              |
| 12 | M106LH | PIP     | 9/46d | 1.55e-05 | 4    | NFP   | NA              |
| 12 | M106LH | DP      | 9/46d | 4.66e-05 | 12   | NFP   | NA              |
| 12 | M106LH | V6      | 9/46d | 9.64e-04 | 248  | NFP   | NA              |
| 12 | M106LH | V6A     | 9/46d | 1.93e-02 | 4960 | NFP   | NA              |
| 12 | M106LH | 5       | 9/46d | 9.72e-04 | 250  | Known | (37)            |
| 12 | M106LH | 7m      | 9/46d | 3.45e-02 | 8878 | Known | (34)            |
| 12 | M106LH | STPr    | 9/46d | 1.52e-04 | 39   | Known | (34, 38)        |
| 12 | M106LH | STPi    | 9/46d | 6.50e-03 | 1672 | Known | (34, 39)        |
| 12 | M106LH | STPc    | 9/46d | 2.56e-02 | 6599 | Known | (34, 39)        |
| 12 | M106LH | TPt     | 9/46d | 8.39e-04 | 216  | NFP   | NA              |
| 12 | M106LH | PGa     | 9/46d | 4.59e-04 | 118  | NFP   | NA              |
| 12 | M106LH | FST     | 9/46d | 2.88e-04 | 74   | NFP   | NA              |
| 12 | M106LH | MST     | 9/46d | 1.96e-03 | 504  | NFP   | NA              |
| 12 | M106LH | MT      | 9/46d | 2.25e-04 | 58   | NFP   | NA              |
| 12 | M106LH | TEO     | 9/46d | 7.77e-06 | 2    | NFP   | NA              |
| 12 | M106LH | PERI    | 9/46d | 7.77e-06 | 2    | NFP   | NA              |
| 12 | M106LH | TEad    | 9/46d | 1.55e-05 | 4    | NFP   | NA              |
| 12 | M106LH | TEav    | 9/46d | 7.77e-06 | 2    | NFP   | NA              |
| 12 | M106LH | TEa/ma  | 9/46d | 1.17e-05 | 3    | NFP   | NA              |
| 12 | M106LH | TEa/mp  | 9/46d | 7.77e-06 | 2    | NFP   | NA              |

|    |        |            |       |          |       |       |              |
|----|--------|------------|-------|----------|-------|-------|--------------|
| 12 | M106LH | POLE       | 9/46d | 1.17e-04 | 30    | Known | (34)         |
| 12 | M106LH | CORE       | 9/46d | 1.55e-05 | 4     | NFP   | NA           |
| 12 | M106LH | MB         | 9/46d | 2.25e-04 | 58    | NFP   | NA           |
| 12 | M106LH | LB         | 9/46d | 7.00e-05 | 18    | Known | (40-41)      |
| 12 | M106LH | PBr        | 9/46d | 5.36e-04 | 138   | Known | (34, 40)     |
| 12 | M106LH | PBc        | 9/46d | 2.02e-03 | 519   | Known | (34, 36, 40) |
| 12 | M106LH | Parainsula | 9/46d | 1.32e-04 | 34    | NFP   | NA           |
| 12 | M106LH | INSULA     | 9/46d | 1.97e-03 | 506   | Known | (34)         |
| 12 | M106LH | Gu         | 9/46d | 2.33e-05 | 6     | NFP   | NA           |
| 12 | M106LH | SII        | 9/46d | 1.05e-04 | 27    | NFP   | NA           |
| 12 | M106LH | 2          | 9/46d | 4.66e-05 | 12    | Known | (34)         |
| 12 | M106LH | 23         | 9/46d | 8.22e-03 | 2116  | Known | (34, 42)     |
| 12 | M106LH | 24a        | 9/46d | 6.30e-04 | 162   | Known | (34)         |
| 12 | M106LH | 24b        | 9/46d | 5.17e-04 | 133   | Known | (34)         |
| 12 | M106LH | 24c        | 9/46d | 3.04e-03 | 782   | Known | (34)         |
| 12 | M106LH | 24d        | 9/46d | 5.52e-04 | 142   | NFP   | NA           |
| 12 | M106LH | 29/30      | 9/46d | 5.44e-03 | 1399  | Known | (34, 42-43)  |
| 12 | M106LH | 31         | 9/46d | 2.73e-02 | 7026  | Known | (34)         |
| 12 | M106LH | 32         | 9/46d | 3.11e-05 | 8     | Known | (34, 44-45)  |
| 12 | M106LH | F1         | 9/46d | 5.44e-05 | 14    | NFP   | NA           |
| 12 | M106LH | F2         | 9/46d | 2.23e-02 | 5736  | Known | (34)         |
| 12 | M106LH | F7         | 9/46d | 5.54e-02 | 14244 | Known | (34)         |
| 12 | M106LH | F3         | 9/46d | 3.58e-04 | 92    | NFP   | NA           |
| 12 | M106LH | F6         | 9/46d | 9.66e-03 | 2485  | Known | (34)         |
| 12 | M106LH | F4         | 9/46d | 8.89e-03 | 2287  | NFP   | NA           |
| 12 | M106LH | F5         | 9/46d | 6.37e-04 | 164   | Known | (34)         |
| 12 | M106LH | ProM       | 9/46d | 3.30e-04 | 85    | Known | (34)         |
| 12 | M106LH | 10         | 9/46d | 7.89e-03 | 2031  | Known | (34, 44)     |
| 12 | M106LH | 9          | 9/46d | 2.44e-02 | 6267  | Known | (34, 46)     |
| 12 | M106LH | 46d        | 9/46d | 1.96e-01 | 50412 | Known | (34)         |
| 12 | M106LH | 46v        | 9/46d | 9.69e-02 | 24941 | Known | (34)         |
| 12 | M106LH | 9/46v      | 9/46d | 1.68e-02 | 4328  | Known | (34, 44, 47) |
| 12 | M106LH | 8B         | 9/46d | 7.10e-02 | 18269 | Known | (34, 47)     |
| 12 | M106LH | 8l         | 9/46d | 1.47e-02 | 3781  | NFP   | NA           |
| 12 | M106LH | 8m         | 9/46d | 2.22e-01 | 57037 | Known | (34, 44, 47) |
| 12 | M106LH | 8r         | 9/46d | 5.87e-02 | 15114 | Known | (34)         |
| 12 | M106LH | 45B        | 9/46d | 4.24e-03 | 1092  | Known | (34)         |
| 12 | M106LH | 45A        | 9/46d | 2.01e-02 | 5162  | Known | (34)         |
| 12 | M106LH | 44         | 9/46d | 9.49e-03 | 2441  | NFP   | NA           |
| 12 | M106LH | OPRO       | 9/46d | 1.30e-03 | 334   | NFP   | NA           |
| 12 | M106LH | OPAI       | 9/46d | 3.11e-05 | 8     | NFP   | NA           |
| 12 | M106LH | 11         | 9/46d | 2.57e-04 | 66    | Known | (34)         |
| 12 | M106LH | 14         | 9/46d | 5.44e-05 | 14    | Known | (34, 48)     |
| 12 | M106LH | 12         | 9/46d | 7.20e-03 | 1852  | Known | (34, 44, 46) |
| 12 | M106LH | 13         | 9/46d | 7.00e-04 | 180   | Known | (34, 48)     |



|    |        |            |    |          |       |       |                |
|----|--------|------------|----|----------|-------|-------|----------------|
| 13 | M106RH | V1         | F5 | 5.37e-05 | 11    | NFP   | NA             |
| 13 | M106RH | V2         | F5 | 3.41e-05 | 7     | NFP   | NA             |
| 13 | M106RH | V3         | F5 | 4.88e-06 | 1     | NFP   | NA             |
| 13 | M106RH | 7op        | F5 | 3.41e-05 | 7     | Known | (49-50)        |
| 13 | M106RH | 7A         | F5 | 7.32e-05 | 15    | Known | (51-52)        |
| 13 | M106RH | 7B         | F5 | 7.72e-02 | 15826 | Known | (36-37, 49-52) |
| 13 | M106RH | LIP        | F5 | 5.66e-03 | 1161  | Known | (49-51)        |
| 13 | M106RH | MIP        | F5 | 4.88e-06 | 1     | NFP   | NA             |
| 13 | M106RH | AIP        | F5 | 3.37e-03 | 690   | Known | (49-53)        |
| 13 | M106RH | V6         | F5 | 9.76e-06 | 2     | NFP   | NA             |
| 13 | M106RH | V6A        | F5 | 1.46e-05 | 3     | NFP   | NA             |
| 13 | M106RH | 5          | F5 | 9.76e-05 | 20    | Known | (37, 51-52)    |
| 13 | M106RH | 7m         | F5 | 4.88e-06 | 1     | NFP   | NA             |
| 13 | M106RH | STPr       | F5 | 3.90e-05 | 8     | NFP   | NA             |
| 13 | M106RH | STPi       | F5 | 1.95e-05 | 4     | NFP   | NA             |
| 13 | M106RH | STPc       | F5 | 4.88e-06 | 1     | NFP   | NA             |
| 13 | M106RH | TEOm       | F5 | 1.46e-05 | 3     | NFP   | NA             |
| 13 | M106RH | PERI       | F5 | 7.32e-05 | 15    | NFP   | NA             |
| 13 | M106RH | TEav       | F5 | 1.17e-04 | 24    | NFP   | NA             |
| 13 | M106RH | TEpd       | F5 | 3.90e-05 | 8     | NFP   | NA             |
| 13 | M106RH | TEpv       | F5 | 9.76e-05 | 20    | NFP   | NA             |
| 13 | M106RH | TEa/ma     | F5 | 6.83e-05 | 14    | Known | (38)           |
| 13 | M106RH | TEa/mp     | F5 | 3.90e-05 | 8     | NFP   | NA             |
| 13 | M106RH | ENTO       | F5 | 1.17e-04 | 24    | NFP   | NA             |
| 13 | M106RH | TH/TF      | F5 | 9.76e-06 | 2     | NFP   | NA             |
| 13 | M106RH | SUB        | F5 | 2.93e-05 | 6     | NFP   | NA             |
| 13 | M106RH | POLE       | F5 | 4.88e-05 | 10    | Known | (54)           |
| 13 | M106RH | CORE       | F5 | 5.37e-05 | 11    | NFP   | NA             |
| 13 | M106RH | MB         | F5 | 3.90e-05 | 8     | NFP   | NA             |
| 13 | M106RH | LB         | F5 | 4.88e-05 | 10    | NFP   | NA             |
| 13 | M106RH | PBr        | F5 | 3.90e-05 | 8     | NFP   | NA             |
| 13 | M106RH | Parainsula | F5 | 2.44e-05 | 5     | Known | (51)           |
| 13 | M106RH | INSULA     | F5 | 6.56e-03 | 1344  | Known | (50-51)        |
| 13 | M106RH | Gu         | F5 | 1.04e-02 | 2129  | Known | (55)           |
| 13 | M106RH | SII        | F5 | 5.88e-02 | 12064 | Known | (49-52, 55)    |
| 13 | M106RH | 1          | F5 | 2.48e-03 | 508   | Known | (52)           |
| 13 | M106RH | 2          | F5 | 2.03e-01 | 41664 | Known | (52, 55)       |
| 13 | M106RH | 3          | F5 | 1.05e-02 | 2149  | Known | (51-52, 55)    |
| 13 | M106RH | 23         | F5 | 1.46e-04 | 30    | NFP   | NA             |
| 13 | M106RH | 24a        | F5 | 7.56e-04 | 155   | Known | (49-51, 55)    |
| 13 | M106RH | 24b        | F5 | 1.32e-04 | 27    | Known | (49, 51, 55)   |
| 13 | M106RH | 24c        | F5 | 8.51e-03 | 1745  | Known | (49-50, 55)    |
| 13 | M106RH | 24d        | F5 | 5.02e-04 | 103   | Known | (49, 51, 55)   |
| 13 | M106RH | 29/30      | F5 | 1.46e-05 | 3     | NFP   | NA             |
| 13 | M106RH | 32         | F5 | 3.90e-05 | 8     | NFP   | NA             |

|    |         |       |    |          |        |       |                     |
|----|---------|-------|----|----------|--------|-------|---------------------|
| 13 | M106RH  | F1    | F5 | 4.30e-03 | 882    | Known | (50-51, 55)         |
| 13 | M106RH  | F2    | F5 | 1.20e-03 | 247    | Known | (50, 55)            |
| 13 | M106RH  | F7    | F5 | 3.90e-05 | 8      | Known | (55)                |
| 13 | M106RH  | F3    | F5 | 3.14e-02 | 6440   | Known | (49-51, 55)         |
| 13 | M106RH  | F6    | F5 | 3.41e-05 | 7      | Known | (55)                |
| 13 | M106RH  | F4    | F5 | 5.00e-01 | 102471 | Known | (49-51, 55)         |
| 13 | M106RH  | ProM  | F5 | 4.55e-02 | 9323   | Known | (35, 49-50, 55)     |
| 13 | M106RH  | 10    | F5 | 9.27e-05 | 19     | NFP   | NA                  |
| 13 | M106RH  | 9     | F5 | 4.88e-05 | 10     | NFP   | NA                  |
| 13 | M106RH  | 46d   | F5 | 9.76e-05 | 20     | Known | (55)                |
| 13 | M106RH  | 46v   | F5 | 1.12e-04 | 23     | Known | (55)                |
| 13 | M106RH  | 9/46d | F5 | 3.41e-05 | 7      | Known | (47)                |
| 13 | M106RH  | 9/46v | F5 | 2.84e-03 | 583    | Known | (44, 47, 49-51, 55) |
| 13 | M106RH  | 8B    | F5 | 4.39e-05 | 9      | Known | (55)                |
| 13 | M106RH  | 8l    | F5 | 8.83e-04 | 181    | Known | (47, 55)            |
| 13 | M106RH  | 8m    | F5 | 4.39e-05 | 9      | Known | (55)                |
| 13 | M106RH  | 8r    | F5 | 2.59e-04 | 53     | Known | (55)                |
| 13 | M106RH  | 45B   | F5 | 1.37e-04 | 28     | Known | (55)                |
| 13 | M106RH  | 45A   | F5 | 2.93e-05 | 6      | NFP   | NA                  |
| 13 | M106RH  | 44    | F5 | 2.86e-03 | 586    | Known | (49-51, 55)         |
| 13 | M106RH  | OPRO  | F5 | 7.96e-03 | 1631   | NFP   | NA                  |
| 13 | M106RH  | OPAI  | F5 | 2.93e-04 | 60     | NFP   | NA                  |
| 13 | M106RH  | 11    | F5 | 1.51e-04 | 31     | NFP   | NA                  |
| 13 | M106RH  | 14    | F5 | 1.46e-05 | 3      | NFP   | NA                  |
| 13 | M106RH  | 25    | F5 | 4.88e-06 | 1      | NFP   | NA                  |
| 13 | M106RH  | 12    | F5 | 1.22e-02 | 2492   | Known | (44, 49, 55)        |
| 13 | M106RH  | 13    | F5 | 1.17e-04 | 24     | Known | (48)                |
| 14 | BB272LH | V2    | 8m | 1.23e-04 | 10     | Known | (3, 34)             |
| 14 | BB272LH | V3    | 8m | 4.91e-05 | 4      | Known | (3)                 |
| 14 | BB272LH | V3A   | 8m | 1.23e-05 | 1      | Known | (3)                 |
| 14 | BB272LH | V4    | 8m | 1.10e-04 | 9      | Known | (3, 56)             |
| 14 | BB272LH | V4t   | 8m | 1.47e-04 | 12     | Known | (3, 26)             |
| 14 | BB272LH | 7op   | 8m | 5.76e-04 | 47     | NFP   | NA                  |
| 14 | BB272LH | 7A    | 8m | 1.64e-03 | 134    | Known | (3, 29, 34, 36-37)  |
| 14 | BB272LH | 7B    | 8m | 7.85e-04 | 64     | Known | (36)                |
| 14 | BB272LH | LIP   | 8m | 6.28e-03 | 512    | Known | (3, 24, 26, 34, 56) |
| 14 | BB272LH | VIP   | 8m | 7.48e-04 | 61     | Known | (3, 34)             |
| 14 | BB272LH | MIP   | 8m | 1.23e-05 | 1      | NFP   | NA                  |
| 14 | BB272LH | PIP   | 8m | 3.68e-05 | 3      | NFP   | NA                  |
| 14 | BB272LH | AIP   | 8m | 9.20e-04 | 75     | NFP   | NA                  |
| 14 | BB272LH | DP    | 8m | 2.08e-04 | 17     | Known | (26, 34, 56)        |
| 14 | BB272LH | V6A   | 8m | 5.89e-04 | 48     | NFP   | NA                  |
| 14 | BB272LH | 5     | 8m | 8.58e-05 | 7      | Known | (37)                |
| 14 | BB272LH | 7m    | 8m | 5.15e-04 | 42     | NFP   | NA                  |
| 14 | BB272LH | STPr  | 8m | 1.47e-03 | 120    | NFP   | NA                  |

|    |         |            |    |          |      |       |                        |
|----|---------|------------|----|----------|------|-------|------------------------|
| 14 | BB272LH | STPi       | 8m | 1.44e-02 | 1171 | Known | (26, 34, 39)           |
| 14 | BB272LH | STPc       | 8m | 3.40e-02 | 2774 | Known | (3, 26, 33-34, 39, 56) |
| 14 | BB272LH | TPt        | 8m | 8.58e-05 | 7    | Known | (26, 34)               |
| 14 | BB272LH | PGa        | 8m | 4.16e-03 | 339  | Known | (26, 34)               |
| 14 | BB272LH | IPa        | 8m | 9.81e-05 | 8    | Known | (26)                   |
| 14 | BB272LH | FST        | 8m | 2.78e-03 | 227  | Known | (3, 20, 26, 56)        |
| 14 | BB272LH | MST        | 8m | 2.10e-03 | 171  | Known | (3, 20, 26, 34, 56)    |
| 14 | BB272LH | MT         | 8m | 6.87e-04 | 56   | Known | (3, 26, 56)            |
| 14 | BB272LH | TEOm       | 8m | 2.45e-05 | 2    | NFP   | NA                     |
| 14 | BB272LH | PERI       | 8m | 2.45e-05 | 2    | NFP   | NA                     |
| 14 | BB272LH | TEpd       | 8m | 4.91e-05 | 4    | Known | (3)                    |
| 14 | BB272LH | TEpv       | 8m | 1.23e-05 | 1    | Known | (26)                   |
| 14 | BB272LH | TEa/ma     | 8m | 3.68e-05 | 3    | NFP   | NA                     |
| 14 | BB272LH | TEa/mp     | 8m | 1.35e-04 | 11   | NFP   | NA                     |
| 14 | BB272LH | ENTO       | 8m | 6.13e-05 | 5    | NFP   | NA                     |
| 14 | BB272LH | TH/TF      | 8m | 1.23e-05 | 1    | Known | (57)                   |
| 14 | BB272LH | POLE       | 8m | 1.47e-04 | 12   | Known | (54)                   |
| 14 | BB272LH | CORE       | 8m | 7.11e-04 | 58   | Known | (34)                   |
| 14 | BB272LH | MB         | 8m | 1.74e-03 | 142  | Known | (34)                   |
| 14 | BB272LH | LB         | 8m | 1.17e-03 | 95   | Known | (33-34, 41)            |
| 14 | BB272LH | PBr        | 8m | 1.19e-03 | 97   | Known | (34)                   |
| 14 | BB272LH | PBc        | 8m | 5.19e-03 | 423  | Known | (33-34, 36, 56)        |
| 14 | BB272LH | Parainsula | 8m | 1.47e-04 | 12   | NFP   | NA                     |
| 14 | BB272LH | INSULA     | 8m | 3.00e-03 | 245  | Known | (56)                   |
| 14 | BB272LH | Gu         | 8m | 9.81e-05 | 8    | NFP   | NA                     |
| 14 | BB272LH | SII        | 8m | 8.95e-04 | 73   | NFP   | NA                     |
| 14 | BB272LH | 2          | 8m | 4.91e-05 | 4    | NFP   | NA                     |
| 14 | BB272LH | 3          | 8m | 2.45e-05 | 2    | Known | (56)                   |
| 14 | BB272LH | 23         | 8m | 2.58e-04 | 21   | Known | (34, 42)               |
| 14 | BB272LH | 24a        | 8m | 7.11e-04 | 58   | Known | (56)                   |
| 14 | BB272LH | 24b        | 8m | 1.02e-03 | 83   | Known | (56)                   |
| 14 | BB272LH | 24c        | 8m | 2.39e-03 | 195  | Known | (56)                   |
| 14 | BB272LH | 24d        | 8m | 3.68e-04 | 30   | NFP   | NA                     |
| 14 | BB272LH | 29/30      | 8m | 1.23e-04 | 10   | Known | (42)                   |
| 14 | BB272LH | 31         | 8m | 3.68e-05 | 3    | Known | (34)                   |
| 14 | BB272LH | 32         | 8m | 2.94e-04 | 24   | NFP   | NA                     |
| 14 | BB272LH | F1         | 8m | 8.58e-04 | 70   | NFP   | NA                     |
| 14 | BB272LH | F2         | 8m | 2.16e-02 | 1760 | Known | (55)                   |
| 14 | BB272LH | F7         | 8m | 1.08e-01 | 8801 | Known | (34, 56)               |
| 14 | BB272LH | F3         | 8m | 2.33e-04 | 19   | NFP   | NA                     |
| 14 | BB272LH | F6         | 8m | 1.28e-03 | 104  | Known | (56)                   |
| 14 | BB272LH | F4         | 8m | 3.86e-02 | 3148 | Known | (56)                   |
| 14 | BB272LH | F5         | 8m | 7.03e-03 | 573  | NFP   | NA                     |
| 14 | BB272LH | ProM       | 8m | 5.76e-04 | 47   | NFP   | NA                     |
| 14 | BB272LH | 10         | 8m | 2.11e-03 | 172  | NFP   | NA                     |

|    |         |       |    |          |       |       |                            |
|----|---------|-------|----|----------|-------|-------|----------------------------|
| 14 | BB272LH | 9     | 8m | 2.16e-03 | 176   | Known | (34, 56)                   |
| 14 | BB272LH | 46d   | 8m | 1.12e-01 | 9125  | Known | (34, 56)                   |
| 14 | BB272LH | 46v   | 8m | 3.37e-02 | 2746  | Known | (34, 56)                   |
| 14 | BB272LH | 9/46d | 8m | 3.78e-02 | 3083  | Known | (34, 47, 56)               |
| 14 | BB272LH | 9/46v | 8m | 9.25e-02 | 7542  | Known | (34, 44)                   |
| 14 | BB272LH | 8B    | 8m | 1.71e-02 | 1393  | Known | (34, 56)                   |
| 14 | BB272LH | 8l    | 8m | 1.85e-01 | 15075 | Known | (34, 44, 47, 56)           |
| 14 | BB272LH | 8r    | 8m | 7.09e-02 | 5783  | Known | (34, 56)                   |
| 14 | BB272LH | 45B   | 8m | 1.24e-01 | 10071 | Known | (34, 56)                   |
| 14 | BB272LH | 45A   | 8m | 2.63e-02 | 2141  | Known | (34)                       |
| 14 | BB272LH | 44    | 8m | 1.58e-02 | 1286  | NFP   | NA                         |
| 14 | BB272LH | OPRO  | 8m | 2.21e-04 | 18    | NFP   | NA                         |
| 14 | BB272LH | OPAI  | 8m | 6.13e-05 | 5     | NFP   | NA                         |
| 14 | BB272LH | 11    | 8m | 1.84e-04 | 15    | NFP   | NA                         |
| 14 | BB272LH | 14    | 8m | 9.81e-05 | 8     | NFP   | NA                         |
| 14 | BB272LH | 12    | 8m | 7.14e-03 | 582   | Known | (34, 56)                   |
| 14 | BB272LH | 13    | 8m | 3.13e-03 | 255   | NFP   | NA                         |
| 15 | BB135LH | V1    | 7A | 1.81e-05 | 2     | NFP   | NA                         |
| 15 | BB135LH | V2    | 7A | 3.61e-05 | 4     | Known | (18, 58-59)                |
| 15 | BB135LH | V3A   | 7A | 3.61e-05 | 4     | NFP   | NA                         |
| 15 | BB135LH | V4    | 7A | 3.01e-03 | 333   | Known | (23, 59)                   |
| 15 | BB135LH | 7B    | 7A | 5.51e-04 | 61    | Known | (60)                       |
| 15 | BB135LH | LIP   | 7A | 1.29e-01 | 14318 | Known | (3, 18, 23-24, 29, 58-60)  |
| 15 | BB135LH | VIP   | 7A | 8.13e-05 | 9     | Known | (3, 60)                    |
| 15 | BB135LH | MIP   | 7A | 3.61e-05 | 4     | Known | (60)                       |
| 15 | BB135LH | PIP   | 7A | 3.16e-04 | 35    | Known | (3, 23, 59)                |
| 15 | BB135LH | DP    | 7A | 2.05e-02 | 2272  | Known | (3, 18, 23, 29, 60)        |
| 15 | BB135LH | V6    | 7A | 1.26e-04 | 14    | Known | (3, 27, 29)                |
| 15 | BB135LH | V6A   | 7A | 7.83e-02 | 8665  | Known | (3, 18, 27, 29, 60)        |
| 15 | BB135LH | 5     | 7A | 1.02e-02 | 1133  | Known | (23, 60-62)                |
| 15 | BB135LH | 7m    | 7A | 2.11e-02 | 2334  | Known | (3, 23, 29, 58, 60, 63-64) |
| 15 | BB135LH | STPr  | 7A | 2.79e-03 | 309   | Known | (3, 18, 27, 29, 59-60, 65) |
| 15 | BB135LH | STPi  | 7A | 4.13e-02 | 4571  | Known | (3, 18, 27, 29, 59-60, 65) |
| 15 | BB135LH | STPc  | 7A | 1.31e-02 | 1455  | Known | (3, 18, 29, 59-60, 65)     |
| 15 | BB135LH | TPt   | 7A | 1.64e-01 | 18147 | Known | (59-60)                    |
| 15 | BB135LH | PGa   | 7A | 1.07e-02 | 1181  | Known | (18, 27, 59, 65)           |
| 15 | BB135LH | IPa   | 7A | 2.35e-03 | 260   | Known | (18, 27, 59-60, 65)        |
| 15 | BB135LH | FST   | 7A | 8.66e-03 | 959   | Known | (3, 27, 59-60, 65)         |
| 15 | BB135LH | MST   | 7A | 1.26e-01 | 13952 | Known | (3, 18, 23, 29, 58-60, 63) |
| 15 | BB135LH | MT    | 7A | 5.42e-05 | 6     | Known | (27, 59-60)                |
| 15 | BB135LH | TEO   | 7A | 2.30e-03 | 255   | Known | (29, 59)                   |
| 15 | BB135LH | TEOm  | 7A | 2.29e-03 | 254   | Known | (29)                       |
| 15 | BB135LH | PERI  | 7A | 3.88e-03 | 429   | Known | (60, 66)                   |
| 15 | BB135LH | TEav  | 7A | 9.03e-05 | 10    | NFP   | NA                         |
| 15 | BB135LH | TEpd  | 7A | 2.72e-03 | 301   | Known | (23, 29, 60)               |

|    |         |         |    |          |       |       |                                    |
|----|---------|---------|----|----------|-------|-------|------------------------------------|
| 15 | BB135LH | TEpv    | 7A | 7.74e-02 | 8563  | Known | (18, 23, 59-60, 66)                |
| 15 | BB135LH | TEa/ma  | 7A | 3.88e-04 | 43    | Known | (3, 18, 27, 59-60)                 |
| 15 | BB135LH | TEa/mp  | 7A | 4.39e-03 | 486   | Known | (3, 18, 29, 65)                    |
| 15 | BB135LH | ENTO    | 7A | 4.45e-03 | 493   | Known | (66)                               |
| 15 | BB135LH | TH/TF   | 7A | 8.31e-04 | 92    | Known | (3, 18, 23, 25, 29, 60, 66)        |
| 15 | BB135LH | POLE    | 7A | 3.79e-04 | 42    | Known | (18, 66)                           |
| 15 | BB135LH | MB      | 7A | 4.52e-05 | 5     | NFP   | NA                                 |
| 15 | BB135LH | LB      | 7A | 1.81e-05 | 2     | Known | (41)                               |
| 15 | BB135LH | INSULA  | 7A | 1.27e-03 | 141   | Known | (60)                               |
| 15 | BB135LH | 2       | 7A | 1.81e-05 | 2     | Known | (60-61)                            |
| 15 | BB135LH | 23      | 7A | 9.21e-02 | 10197 | Known | (18, 29, 45, 60)                   |
| 15 | BB135LH | 24a     | 7A | 9.03e-05 | 10    | Known | (18, 29, 60)                       |
| 15 | BB135LH | 24b     | 7A | 5.87e-03 | 650   | Known | (29, 58, 60)                       |
| 15 | BB135LH | 29/30   | 7A | 3.64e-02 | 4030  | Known | (18, 29, 60)                       |
| 15 | BB135LH | 31      | 7A | 7.33e-02 | 8118  | Known | (29, 60)                           |
| 15 | BB135LH | F1      | 7A | 1.63e-04 | 18    | NFP   | NA                                 |
| 15 | BB135LH | F2      | 7A | 7.49e-03 | 829   | Known | (33, 60)                           |
| 15 | BB135LH | F7      | 7A | 9.03e-05 | 10    | Known | (60, 67)                           |
| 15 | BB135LH | F3      | 7A | 4.97e-04 | 55    | Known | (60)                               |
| 15 | BB135LH | F5      | 7A | 1.31e-03 | 145   | Known | (33, 60)                           |
| 15 | BB135LH | 9       | 7A | 5.42e-05 | 6     | Known | (63, 67)                           |
| 15 | BB135LH | 46d     | 7A | 1.46e-02 | 1612  | Known | (3, 23, 29, 58, 63, 67)            |
| 15 | BB135LH | 46v     | 7A | 1.45e-04 | 16    | Known | (3, 23, 29, 33, 58, 60, 63, 67)    |
| 15 | BB135LH | 9/46d   | 7A | 2.27e-03 | 251   | Known | (29, 47, 58, 60-61, 63, 67)        |
| 15 | BB135LH | 9/46v   | 7A | 3.80e-03 | 421   | Known | (33, 47, 58, 60, 67)               |
| 15 | BB135LH | 8B      | 7A | 7.52e-03 | 833   | Known | (23, 29, 33, 60, 63, 67)           |
| 15 | BB135LH | 8l      | 7A | 3.61e-04 | 40    | Known | (3, 29, 58, 60)                    |
| 15 | BB135LH | 8m      | 7A | 1.94e-02 | 2144  | Known | (3, 22-23, 29, 33, 47, 58, 60, 67) |
| 15 | BB135LH | 45B     | 7A | 1.35e-04 | 15    | Known | (33, 58, 60, 67)                   |
| 15 | BB135LH | 45A     | 7A | 1.35e-03 | 149   | Known | (29, 33, 58, 60, 67)               |
| 15 | BB135LH | 12      | 7A | 6.32e-05 | 7     | Known | (33, 60)                           |
| 15 | BB135LH | 13      | 7A | 1.81e-05 | 2     | Known | (67)                               |
| 16 | M89LH   | V1      | DP | 1.19e-05 | 3     | NFP   | NA                                 |
| 16 | M89LH   | V2      | DP | 7.94e-02 | 19967 | Known | (23)                               |
| 16 | M89LH   | V3      | DP | 5.04e-03 | 1269  | Known | (9, 23, 29)                        |
| 16 | M89LH   | V3A     | DP | 3.20e-02 | 8044  | Known | (3, 23)                            |
| 16 | M89LH   | V4      | DP | 3.38e-01 | 84923 | Known | (3, 11, 23, 29)                    |
| 16 | M89LH   | V4t     | DP | 7.91e-03 | 1989  | NFP   | NA                                 |
| 16 | M89LH   | Pro.St. | DP | 2.31e-04 | 58    | NFP   | NA                                 |
| 16 | M89LH   | 7A      | DP | 1.18e-01 | 29688 | Known | (3, 23, 29, 62)                    |
| 16 | M89LH   | LIP     | DP | 2.02e-02 | 5083  | Known | (3, 23-24, 29)                     |
| 16 | M89LH   | VIP     | DP | 9.14e-04 | 230   | Known | (23)                               |
| 16 | M89LH   | MIP     | DP | 6.49e-03 | 1632  | Known | (23)                               |
| 16 | M89LH   | PIP     | DP | 3.71e-02 | 9335  | Known | (3, 23)                            |
| 16 | M89LH   | V6      | DP | 2.02e-02 | 5083  | Known | (3, 68)                            |

|    |       |        |    |          |       |       |                 |
|----|-------|--------|----|----------|-------|-------|-----------------|
| 16 | M89LH | V6A    | DP | 3.88e-02 | 9766  | Known | (3, 29)         |
| 16 | M89LH | 7m     | DP | 2.35e-04 | 59    | Known | (23)            |
| 16 | M89LH | STPr   | DP | 7.95e-06 | 2     | NFP   | NA              |
| 16 | M89LH | STPi   | DP | 4.77e-05 | 12    | NFP   | NA              |
| 16 | M89LH | STPc   | DP | 3.62e-04 | 91    | NFP   | NA              |
| 16 | M89LH | TPt    | DP | 9.54e-05 | 24    | NFP   | NA              |
| 16 | M89LH | PGa    | DP | 8.98e-04 | 226   | NFP   | NA              |
| 16 | M89LH | IPa    | DP | 7.79e-04 | 196   | NFP   | NA              |
| 16 | M89LH | FST    | DP | 1.04e-02 | 2609  | NFP   | NA              |
| 16 | M89LH | MST    | DP | 5.18e-02 | 13042 | Known | (3, 20, 23, 29) |
| 16 | M89LH | MT     | DP | 1.62e-01 | 40862 | Known | (23)            |
| 16 | M89LH | TEO    | DP | 3.38e-04 | 85    | Known | (23)            |
| 16 | M89LH | TEOm   | DP | 7.87e-03 | 1979  | NFP   | NA              |
| 16 | M89LH | PERI   | DP | 5.56e-05 | 14    | NFP   | NA              |
| 16 | M89LH | TEad   | DP | 3.18e-05 | 8     | NFP   | NA              |
| 16 | M89LH | TEav   | DP | 4.77e-05 | 12    | NFP   | NA              |
| 16 | M89LH | TEpd   | DP | 1.22e-03 | 306   | Known | (23)            |
| 16 | M89LH | TEpv   | DP | 2.70e-02 | 6782  | Known | (23)            |
| 16 | M89LH | TEa/ma | DP | 3.70e-04 | 93    | NFP   | NA              |
| 16 | M89LH | TEa/mp | DP | 2.15e-04 | 54    | NFP   | NA              |
| 16 | M89LH | ENTO   | DP | 4.61e-04 | 116   | NFP   | NA              |
| 16 | M89LH | TH/TF  | DP | 1.80e-02 | 4528  | Known | (23)            |
| 16 | M89LH | SUB    | DP | 7.95e-06 | 2     | NFP   | NA              |
| 16 | M89LH | PBc    | DP | 1.43e-04 | 36    | NFP   | NA              |
| 16 | M89LH | INSULA | DP | 3.97e-06 | 1     | NFP   | NA              |
| 16 | M89LH | 23     | DP | 2.02e-03 | 508   | Known | (42)            |
| 16 | M89LH | 24b    | DP | 9.06e-04 | 228   | NFP   | NA              |
| 16 | M89LH | 24c    | DP | 2.78e-05 | 7     | NFP   | NA              |
| 16 | M89LH | 29/30  | DP | 3.97e-04 | 100   | Known | (42)            |
| 16 | M89LH | 31     | DP | 2.15e-03 | 542   | NFP   | NA              |
| 16 | M89LH | F2     | DP | 1.54e-03 | 387   | NFP   | NA              |
| 16 | M89LH | F7     | DP | 5.68e-04 | 143   | NFP   | NA              |
| 16 | M89LH | F4     | DP | 1.59e-05 | 4     | NFP   | NA              |
| 16 | M89LH | F5     | DP | 1.59e-05 | 4     | NFP   | NA              |
| 16 | M89LH | 9      | DP | 1.59e-05 | 4     | Known | (3)             |
| 16 | M89LH | 46d    | DP | 7.55e-04 | 190   | Known | (3, 23)         |
| 16 | M89LH | 46v    | DP | 8.35e-05 | 21    | NFP   | NA              |
| 16 | M89LH | 9/46d  | DP | 7.83e-04 | 197   | NFP   | NA              |
| 16 | M89LH | 8B     | DP | 1.12e-03 | 283   | Known | (3)             |
| 16 | M89LH | 8m     | DP | 1.90e-03 | 478   | Known | (3, 23)         |
| 16 | M89LH | 8r     | DP | 4.41e-04 | 111   | Known | (23)            |
| 16 | M89LH | 45B    | DP | 6.76e-04 | 170   | Known | (23)            |
| 16 | M89LH | 45A    | DP | 1.59e-05 | 4     | NFP   | NA              |
| 16 | M89LH | 12     | DP | 3.97e-06 | 1     | NFP   | NA              |
| 17 | M98LH | 7op    | 2  | 2.06e-03 | 363   | Known | (35)            |

|    |       |        |   |          |       |       |                    |
|----|-------|--------|---|----------|-------|-------|--------------------|
| 17 | M98LH | 7A     | 2 | 5.69e-06 | 1     | Known | (35)               |
| 17 | M98LH | 7B     | 2 | 2.03e-03 | 357   | Known | (3, 35, 37, 69)    |
| 17 | M98LH | LIP    | 2 | 1.57e-03 | 276   | Known | (35)               |
| 17 | M98LH | VIP    | 2 | 5.69e-06 | 1     | Known | (35)               |
| 17 | M98LH | AIP    | 2 | 2.44e-03 | 430   | Known | (35)               |
| 17 | M98LH | PERI   | 2 | 8.07e-04 | 142   | NFP   | NA                 |
| 17 | M98LH | TEav   | 2 | 1.42e-04 | 25    | NFP   | NA                 |
| 17 | M98LH | TEa/ma | 2 | 6.82e-05 | 12    | NFP   | NA                 |
| 17 | M98LH | ENTO   | 2 | 1.44e-03 | 253   | NFP   | NA                 |
| 17 | M98LH | POLE   | 2 | 4.83e-04 | 85    | NFP   | NA                 |
| 17 | M98LH | MB     | 2 | 9.10e-05 | 16    | NFP   | NA                 |
| 17 | M98LH | LB     | 2 | 1.71e-05 | 3     | NFP   | NA                 |
| 17 | M98LH | INSULA | 2 | 3.00e-02 | 5272  | Known | (35, 51)           |
| 17 | M98LH | Gu     | 2 | 7.76e-03 | 1365  | NFP   | NA                 |
| 17 | M98LH | SII    | 2 | 3.80e-01 | 66797 | Known | (3, 35, 51, 69-70) |
| 17 | M98LH | 1      | 2 | 9.26e-03 | 1628  | Known | (3, 35, 51, 69-70) |
| 17 | M98LH | 3      | 2 | 2.40e-01 | 42204 | Known | (3, 35, 51, 69-70) |
| 17 | M98LH | 24b    | 2 | 5.69e-05 | 10    | Known | (51)               |
| 17 | M98LH | 24c    | 2 | 2.39e-04 | 42    | NFP   | NA                 |
| 17 | M98LH | 24d    | 2 | 7.96e-05 | 14    | Known | (51)               |
| 17 | M98LH | 31     | 2 | 2.84e-05 | 5     | NFP   | NA                 |
| 17 | M98LH | F1     | 2 | 4.32e-04 | 76    | Known | (3, 35, 51, 69-70) |
| 17 | M98LH | F3     | 2 | 5.74e-04 | 101   | Known | (3, 51, 69)        |
| 17 | M98LH | F4     | 2 | 1.11e-01 | 19484 | Known | (35)               |
| 17 | M98LH | F5     | 2 | 1.42e-01 | 25018 | Known | (35, 51, 55)       |
| 17 | M98LH | ProM   | 2 | 4.24e-02 | 7453  | Known | (35)               |
| 17 | M98LH | 46d    | 2 | 1.14e-05 | 2     | NFP   | NA                 |
| 17 | M98LH | 9/46v  | 2 | 1.04e-02 | 1837  | Known | (35)               |
| 17 | M98LH | 44     | 2 | 5.69e-04 | 100   | Known | (35)               |
| 17 | M98LH | OPRO   | 2 | 7.63e-03 | 1342  | NFP   | NA                 |
| 17 | M98LH | OPAI   | 2 | 2.10e-04 | 37    | NFP   | NA                 |
| 17 | M98LH | 12     | 2 | 6.17e-03 | 1086  | NFP   | NA                 |
| 17 | M98LH | 13     | 2 | 1.76e-04 | 31    | NFP   | NA                 |
| 17 | M98LH | PIRI   | 2 | 2.27e-05 | 4     | NFP   | NA                 |
| 18 | M70LH | 7op    | 5 | 1.02e-01 | 3235  | Known | (35, 71)           |
| 18 | M70LH | 7A     | 5 | 1.51e-01 | 4797  | Known | (3, 62, 71-73)     |
| 18 | M70LH | 7B     | 5 | 1.14e-02 | 363   | Known | (3, 69, 72-73)     |
| 18 | M70LH | LIP    | 5 | 2.95e-03 | 94    | Known | (24)               |
| 18 | M70LH | VIP    | 5 | 1.68e-02 | 536   | Known | (73)               |
| 18 | M70LH | MIP    | 5 | 1.63e-03 | 52    | Known | (71-73)            |
| 18 | M70LH | AIP    | 5 | 1.00e-03 | 32    | Known | (73)               |
| 18 | M70LH | 7m     | 5 | 1.82e-03 | 58    | Known | (64, 71-73)        |
| 18 | M70LH | STPi   | 5 | 2.01e-03 | 64    | NFP   | NA                 |
| 18 | M70LH | TPt    | 5 | 6.21e-03 | 198   | NFP   | NA                 |
| 18 | M70LH | MST    | 5 | 3.14e-04 | 10    | Known | (73)               |

|    |       |        |    |          |       |       |                        |
|----|-------|--------|----|----------|-------|-------|------------------------|
| 18 | M70LH | PERI   | 5  | 1.26e-04 | 4     | NFP   | NA                     |
| 18 | M70LH | TEa/ma | 5  | 2.51e-04 | 8     | NFP   | NA                     |
| 18 | M70LH | ENTO   | 5  | 3.77e-04 | 12    | NFP   | NA                     |
| 18 | M70LH | POLE   | 5  | 2.51e-04 | 8     | NFP   | NA                     |
| 18 | M70LH | MB     | 5  | 3.77e-04 | 12    | NFP   | NA                     |
| 18 | M70LH | INSULA | 5  | 9.23e-03 | 294   | Known | (3, 71)                |
| 18 | M70LH | 1      | 5  | 2.51e-03 | 80    | Known | (3, 69, 71)            |
| 18 | M70LH | 2      | 5  | 3.63e-02 | 1158  | Known | (3, 69, 71)            |
| 18 | M70LH | 3      | 5  | 3.21e-02 | 1022  | Known | (69, 71)               |
| 18 | M70LH | 23     | 5  | 8.86e-02 | 2822  | Known | (71-73)                |
| 18 | M70LH | 24a    | 5  | 6.28e-05 | 2     | NFP   | NA                     |
| 18 | M70LH | 24b    | 5  | 1.26e-02 | 400   | Known | (71)                   |
| 18 | M70LH | 24d    | 5  | 6.03e-03 | 192   | Known | (71)                   |
| 18 | M70LH | 29/30  | 5  | 2.95e-03 | 94    | Known | (43)                   |
| 18 | M70LH | 31     | 5  | 2.01e-03 | 64    | Known | (71-72)                |
| 18 | M70LH | F1     | 5  | 3.37e-01 | 10733 | Known | (3, 71)                |
| 18 | M70LH | F2     | 5  | 1.18e-01 | 3746  | Known | (3, 71-73)             |
| 18 | M70LH | F7     | 5  | 3.14e-04 | 10    | Known | (3, 71)                |
| 18 | M70LH | F3     | 5  | 4.46e-02 | 1421  | Known | (3, 71-73)             |
| 18 | M70LH | F6     | 5  | 3.52e-03 | 112   | Known | (3, 73)                |
| 18 | M70LH | F5     | 5  | 6.84e-03 | 218   | Known | (3, 71)                |
| 18 | M70LH | 46d    | 5  | 1.88e-04 | 6     | Known | (73)                   |
| 18 | M70LH | 12     | 5  | 1.26e-04 | 4     | NFP   | NA                     |
| 19 | M68LH | V2     | 7B | 3.98e-05 | 3     | NFP   | NA                     |
| 19 | M68LH | 7op    | 7B | 1.52e-01 | 11436 | Known | (18, 35, 60, 74-75)    |
| 19 | M68LH | 7A     | 7B | 3.97e-01 | 29968 | Known | (51, 60, 62, 74)       |
| 19 | M68LH | LIP    | 7B | 5.78e-02 | 4358  | Known | (18, 60, 74-75)        |
| 19 | M68LH | VIP    | 7B | 6.06e-02 | 4568  | Known | (18, 51, 60, 74-75)    |
| 19 | M68LH | MIP    | 7B | 7.14e-02 | 5386  | Known | (18, 51, 60, 74)       |
| 19 | M68LH | AIP    | 7B | 2.68e-02 | 2022  | Known | (18, 51, 60, 74-75)    |
| 19 | M68LH | V6A    | 7B | 1.38e-03 | 104   | Known | (60)                   |
| 19 | M68LH | 5      | 7B | 2.18e-02 | 1644  | Known | (3, 18, 51, 60, 74-75) |
| 19 | M68LH | 7m     | 7B | 1.86e-02 | 1405  | Known | (18, 51)               |
| 19 | M68LH | STPr   | 7B | 1.59e-04 | 12    | Known | (60, 74)               |
| 19 | M68LH | STPi   | 7B | 7.95e-05 | 6     | Known | (18, 60, 74-75)        |
| 19 | M68LH | STPc   | 7B | 9.89e-03 | 746   | Known | (18, 60, 74)           |
| 19 | M68LH | TPt    | 7B | 1.28e-02 | 966   | Known | (60)                   |
| 19 | M68LH | PGa    | 7B | 5.44e-04 | 41    | NFP   | NA                     |
| 19 | M68LH | MST    | 7B | 1.30e-02 | 978   | Known | (18, 60)               |
| 19 | M68LH | MT     | 7B | 1.70e-03 | 128   | Known | (60)                   |
| 19 | M68LH | PERI   | 7B | 7.95e-05 | 6     | NFP   | NA                     |
| 19 | M68LH | TEpv   | 7B | 5.30e-05 | 4     | NFP   | NA                     |
| 19 | M68LH | TEa/ma | 7B | 3.05e-04 | 23    | Known | (18, 60, 74)           |
| 19 | M68LH | TH/TF  | 7B | 1.59e-04 | 12    | NFP   | NA                     |
| 19 | M68LH | MB     | 7B | 5.04e-04 | 38    | Known | (51)                   |



|    |         |         |      |          |        |       |                        |
|----|---------|---------|------|----------|--------|-------|------------------------|
| 19 | M68LH   | LB      | 7B   | 1.44e-03 | 109    | NFP   | NA                     |
| 19 | M68LH   | PBc     | 7B   | 5.30e-05 | 4      | NFP   | NA                     |
| 19 | M68LH   | INSULA  | 7B   | 1.46e-02 | 1099   | Known | (18, 60, 74-75)        |
| 19 | M68LH   | SII     | 7B   | 5.32e-02 | 4011   | Known | (3, 18, 51, 60, 74-75) |
| 19 | M68LH   | 2       | 7B   | 3.08e-03 | 232    | Known | (3, 18, 60, 74-75)     |
| 19 | M68LH   | 23      | 7B   | 5.46e-03 | 412    | Known | (18, 51, 60, 75)       |
| 19 | M68LH   | 24b     | 7B   | 1.91e-03 | 144    | Known | (51, 60, 74)           |
| 19 | M68LH   | 24c     | 7B   | 3.98e-05 | 3      | Known | (18, 60)               |
| 19 | M68LH   | 24d     | 7B   | 1.67e-03 | 126    | Known | (60)                   |
| 19 | M68LH   | F1      | 7B   | 9.41e-04 | 71     | Known | (3, 60, 74)            |
| 19 | M68LH   | F2      | 7B   | 2.93e-03 | 221    | Known | (3, 51, 60, 67, 74)    |
| 19 | M68LH   | F3      | 7B   | 1.17e-03 | 88     | Known | (3, 18, 51, 60, 74)    |
| 19 | M68LH   | F4      | 7B   | 1.19e-02 | 899    | Known | (3, 18, 60, 74)        |
| 19 | M68LH   | F5      | 7B   | 3.66e-02 | 2763   | Known | (3, 18, 60, 67, 74)    |
| 19 | M68LH   | ProM    | 7B   | 6.63e-04 | 50     | Known | (18, 60, 74)           |
| 19 | M68LH   | 46v     | 7B   | 6.76e-04 | 51     | Known | (60, 67)               |
| 19 | M68LH   | 9/46d   | 7B   | 2.52e-04 | 19     | Known | (60, 67, 74)           |
| 19 | M68LH   | 9/46v   | 7B   | 1.27e-02 | 958    | Known | (47, 60, 67, 74)       |
| 19 | M68LH   | 8m      | 7B   | 1.86e-04 | 14     | Known | (22, 60, 67)           |
| 19 | M68LH   | 45B     | 7B   | 3.45e-04 | 26     | Known | (60, 67, 74)           |
| 19 | M68LH   | 44      | 7B   | 2.72e-03 | 205    | Known | (51, 60, 67, 74)       |
| 19 | M68LH   | 12      | 7B   | 1.01e-03 | 76     | Known | (60, 67, 74)           |
| 20 | BB289LH | V2      | STPr | 5.28e-06 | 4      | NFP   | NA                     |
| 20 | BB289LH | V4      | STPr | 2.64e-06 | 2      | NFP   | NA                     |
| 20 | BB289LH | Pro.St. | STPr | 9.64e-05 | 73     | NFP   | NA                     |
| 20 | BB289LH | 7A      | STPr | 1.88e-04 | 142    | Known | (76-78)                |
| 20 | BB289LH | LIP     | STPr | 1.20e-04 | 91     | NFP   | NA                     |
| 20 | BB289LH | DP      | STPr | 3.70e-05 | 28     | NFP   | NA                     |
| 20 | BB289LH | STPi    | STPr | 2.33e-01 | 176360 | Known | (3, 78-79)             |
| 20 | BB289LH | STPc    | STPr | 2.93e-02 | 22189  | Known | (3, 78-79)             |
| 20 | BB289LH | TPt     | STPr | 1.32e-05 | 10     | Known | (78)                   |
| 20 | BB289LH | PGa     | STPr | 3.33e-02 | 25236  | Known | (78-79)                |
| 20 | BB289LH | IPa     | STPr | 2.09e-02 | 15848  | Known | (78-79)                |
| 20 | BB289LH | FST     | STPr | 2.26e-03 | 1714   | Known | (78)                   |
| 20 | BB289LH | MST     | STPr | 1.83e-02 | 13860  | Known | (78-79)                |
| 20 | BB289LH | MT      | STPr | 1.32e-05 | 10     | Known | (78-79)                |
| 20 | BB289LH | TEO     | STPr | 5.28e-06 | 4      | NFP   | NA                     |
| 20 | BB289LH | TEOm    | STPr | 2.06e-04 | 156    | NFP   | NA                     |
| 20 | BB289LH | PERI    | STPr | 9.93e-03 | 7516   | Known | (25, 66, 78)           |
| 20 | BB289LH | TEad    | STPr | 6.44e-04 | 488    | Known | (32)                   |
| 20 | BB289LH | TEav    | STPr | 1.37e-02 | 10376  | NFP   | NA                     |
| 20 | BB289LH | TEpd    | STPr | 9.27e-04 | 702    | NFP   | NA                     |
| 20 | BB289LH | TEpv    | STPr | 1.61e-03 | 1218   | Known | (78)                   |
| 20 | BB289LH | TEa/ma  | STPr | 4.48e-02 | 33936  | Known | (78)                   |
| 20 | BB289LH | TEa/mp  | STPr | 3.94e-03 | 2982   | NFP   | NA                     |

|    |         |            |      |          |        |       |                 |
|----|---------|------------|------|----------|--------|-------|-----------------|
| 20 | BB289LH | ENTO       | STPr | 3.86e-03 | 2920   | Known | (66)            |
| 20 | BB289LH | TH/TF      | STPr | 1.50e-02 | 11343  | Known | (3, 25, 66, 78) |
| 20 | BB289LH | SUB        | STPr | 9.83e-04 | 744    | NFP   | NA              |
| 20 | BB289LH | POLE       | STPr | 2.22e-01 | 168340 | Known | (66, 78, 80)    |
| 20 | BB289LH | CORE       | STPr | 9.61e-04 | 728    | NFP   | NA              |
| 20 | BB289LH | MB         | STPr | 1.63e-02 | 12348  | Known | (78)            |
| 20 | BB289LH | LB         | STPr | 7.07e-03 | 5354   | Known | (78)            |
| 20 | BB289LH | PBr        | STPr | 1.94e-01 | 147032 | Known | (78)            |
| 20 | BB289LH | PBe        | STPr | 8.54e-03 | 6464   | Known | (76)            |
| 20 | BB289LH | Parainsula | STPr | 5.27e-03 | 3994   | Known | (78)            |
| 20 | BB289LH | INSULA     | STPr | 9.51e-04 | 720    | NFP   | NA              |
| 20 | BB289LH | Gu         | STPr | 5.28e-06 | 4      | NFP   | NA              |
| 20 | BB289LH | 23         | STPr | 5.48e-04 | 415    | Known | (42, 45, 78)    |
| 20 | BB289LH | 24a        | STPr | 8.45e-04 | 640    | NFP   | NA              |
| 20 | BB289LH | 24b        | STPr | 1.29e-03 | 978    | NFP   | NA              |
| 20 | BB289LH | 24c        | STPr | 2.64e-04 | 200    | NFP   | NA              |
| 20 | BB289LH | 29/30      | STPr | 1.91e-04 | 145    | Known | (64, 78)        |
| 20 | BB289LH | 32         | STPr | 1.56e-03 | 1184   | Known | (39, 81)        |
| 20 | BB289LH | F1         | STPr | 1.06e-05 | 8      | NFP   | NA              |
| 20 | BB289LH | F2         | STPr | 1.58e-05 | 12     | NFP   | NA              |
| 20 | BB289LH | F7         | STPr | 5.02e-05 | 38     | NFP   | NA              |
| 20 | BB289LH | F4         | STPr | 5.28e-06 | 4      | NFP   | NA              |
| 20 | BB289LH | 10         | STPr | 3.23e-02 | 24421  | Known | (38-39, 81)     |
| 20 | BB289LH | 9          | STPr | 1.66e-03 | 1255   | Known | (39)            |
| 20 | BB289LH | 46d        | STPr | 9.75e-03 | 7382   | Known | (3)             |
| 20 | BB289LH | 46v        | STPr | 8.70e-03 | 6590   | Known | (3)             |
| 20 | BB289LH | 9/46d      | STPr | 9.91e-05 | 75     | Known | (3)             |
| 20 | BB289LH | 9/46v      | STPr | 5.22e-04 | 395    | Known | (3)             |
| 20 | BB289LH | 8B         | STPr | 5.81e-04 | 440    | NFP   | NA              |
| 20 | BB289LH | 8l         | STPr | 4.75e-05 | 36     | NFP   | NA              |
| 20 | BB289LH | 8m         | STPr | 3.43e-04 | 260    | NFP   | NA              |
| 20 | BB289LH | 8r         | STPr | 5.81e-05 | 44     | NFP   | NA              |
| 20 | BB289LH | 45B        | STPr | 7.82e-04 | 592    | Known | (39)            |
| 20 | BB289LH | 45A        | STPr | 2.11e-03 | 1600   | Known | (39)            |
| 20 | BB289LH | 44         | STPr | 1.11e-04 | 84     | NFP   | NA              |
| 20 | BB289LH | OPRO       | STPr | 6.40e-03 | 4844   | NFP   | NA              |
| 20 | BB289LH | OPAI       | STPr | 2.98e-04 | 226    | NFP   | NA              |
| 20 | BB289LH | 11         | STPr | 4.53e-03 | 3428   | Known | (38-39)         |
| 20 | BB289LH | 14         | STPr | 1.26e-02 | 9577   | Known | (39)            |
| 20 | BB289LH | 25         | STPr | 6.88e-03 | 5212   | Known | (38-39)         |
| 20 | BB289LH | 12         | STPr | 1.70e-02 | 12885  | Known | (38-39)         |
| 20 | BB289LH | 13         | STPr | 1.61e-03 | 1220   | Known | (38-39)         |
| 20 | BB289LH | PIRI       | STPr | 7.40e-05 | 56     | NFP   | NA              |
| 21 | BB289LH | V4t        | STPi | 3.22e-05 | 3      | NFP   | NA              |
| 21 | BB289LH | Pro.St.    | STPi | 7.52e-05 | 7      | Known | (78)            |

|    |         |            |      |          |       |       |                 |
|----|---------|------------|------|----------|-------|-------|-----------------|
| 21 | BB289LH | LIP        | STPi | 4.30e-05 | 4     | Known | (78)            |
| 21 | BB289LH | STPr       | STPi | 2.21e-02 | 2054  | Known | (78-79)         |
| 21 | BB289LH | STPc       | STPi | 2.39e-01 | 22266 | Known | (19, 78-79)     |
| 21 | BB289LH | TPt        | STPi | 8.60e-05 | 8     | Known | (78)            |
| 21 | BB289LH | PGa        | STPi | 4.30e-03 | 400   | Known | (78-79)         |
| 21 | BB289LH | IPa        | STPi | 1.16e-03 | 108   | NFP   | NA              |
| 21 | BB289LH | MST        | STPi | 7.11e-02 | 6616  | Known | (20, 78-79)     |
| 21 | BB289LH | MT         | STPi | 4.30e-05 | 4     | Known | (78-79)         |
| 21 | BB289LH | PERI       | STPi | 8.60e-05 | 8     | Known | (25, 66, 78)    |
| 21 | BB289LH | TEav       | STPi | 1.72e-04 | 16    | Known | (78)            |
| 21 | BB289LH | TEpd       | STPi | 1.50e-04 | 14    | NFP   | NA              |
| 21 | BB289LH | TEa/ma     | STPi | 8.60e-05 | 8     | NFP   | NA              |
| 21 | BB289LH | TEa/mp     | STPi | 4.08e-04 | 38    | NFP   | NA              |
| 21 | BB289LH | TH/TF      | STPi | 6.45e-04 | 60    | Known | (25, 66, 78)    |
| 21 | BB289LH | POLE       | STPi | 1.30e-01 | 12098 | Known | (66, 78, 80)    |
| 21 | BB289LH | CORE       | STPi | 1.90e-02 | 1768  | Known | (78)            |
| 21 | BB289LH | MB         | STPi | 1.16e-02 | 1084  | Known | (78)            |
| 21 | BB289LH | LB         | STPi | 7.28e-02 | 6776  | Known | (78)            |
| 21 | BB289LH | PBr        | STPi | 3.15e-01 | 29306 | Known | (78)            |
| 21 | BB289LH | PBc        | STPi | 5.44e-02 | 5062  | Known | (76, 78)        |
| 21 | BB289LH | Parainsula | STPi | 8.81e-04 | 82    | Known | (78)            |
| 21 | BB289LH | INSULA     | STPi | 6.23e-04 | 58    | NFP   | NA              |
| 21 | BB289LH | Gu         | STPi | 4.30e-05 | 4     | NFP   | NA              |
| 21 | BB289LH | 23         | STPi | 4.62e-04 | 43    | Known | (42, 45, 78)    |
| 21 | BB289LH | 24c        | STPi | 1.40e-04 | 13    | Known | (35, 39)        |
| 21 | BB289LH | 24d        | STPi | 4.30e-05 | 4     | NFP   | NA              |
| 21 | BB289LH | 29/30      | STPi | 4.30e-05 | 4     | Known | (42-43, 64, 78) |
| 21 | BB289LH | 32         | STPi | 3.44e-04 | 32    | Known | (39)            |
| 21 | BB289LH | F7         | STPi | 8.60e-05 | 8     | NFP   | NA              |
| 21 | BB289LH | F6         | STPi | 8.60e-05 | 8     | NFP   | NA              |
| 21 | BB289LH | 10         | STPi | 2.40e-02 | 2233  | Known | (38-39)         |
| 21 | BB289LH | 9          | STPi | 4.73e-04 | 44    | Known | (39)            |
| 21 | BB289LH | 46d        | STPi | 3.62e-03 | 337   | Known | (39)            |
| 21 | BB289LH | 46v        | STPi | 2.47e-03 | 230   | Known | (39)            |
| 21 | BB289LH | 9/46d      | STPi | 2.04e-04 | 19    | Known | (39)            |
| 21 | BB289LH | 8B         | STPi | 2.15e-04 | 20    | NFP   | NA              |
| 21 | BB289LH | 8m         | STPi | 4.30e-05 | 4     | Known | (47)            |
| 21 | BB289LH | 45A        | STPi | 3.87e-04 | 36    | NFP   | NA              |
| 21 | BB289LH | OPRO       | STPi | 4.30e-04 | 40    | NFP   | NA              |
| 21 | BB289LH | 11         | STPi | 3.22e-04 | 30    | NFP   | NA              |
| 21 | BB289LH | 14         | STPi | 1.36e-02 | 1264  | Known | (39)            |
| 21 | BB289LH | 25         | STPi | 2.71e-03 | 252   | Known | (39)            |
| 21 | BB289LH | 12         | STPi | 6.07e-03 | 565   | Known | (38)            |
| 21 | BB289LH | 13         | STPi | 2.15e-04 | 20    | Known | (38)            |
| 22 | M90RH   | V2         | STPc | 3.88e-04 | 112   | Known | (78)            |

|    |       |            |      |          |        |       |              |
|----|-------|------------|------|----------|--------|-------|--------------|
| 22 | M90RH | V3A        | STPc | 2.77e-05 | 8      | NFP   | NA           |
| 22 | M90RH | V4         | STPc | 1.36e-03 | 392    | Known | (78)         |
| 22 | M90RH | Pro.St.    | STPc | 1.94e-04 | 56     | Known | (78)         |
| 22 | M90RH | 7op        | STPc | 8.03e-04 | 232    | Known | (35, 78)     |
| 22 | M90RH | 7A         | STPc | 1.41e-03 | 408    | Known | (62, 76-78)  |
| 22 | M90RH | 7B         | STPc | 2.21e-04 | 64     | Known | (78)         |
| 22 | M90RH | LIP        | STPc | 2.79e-02 | 8072   | Known | (24, 78)     |
| 22 | M90RH | VIP        | STPc | 5.54e-05 | 16     | NFP   | NA           |
| 22 | M90RH | PIP        | STPc | 4.79e-03 | 1384   | Known | (78)         |
| 22 | M90RH | DP         | STPc | 1.94e-04 | 56     | NFP   | NA           |
| 22 | M90RH | V6A        | STPc | 1.38e-05 | 4      | NFP   | NA           |
| 22 | M90RH | 5          | STPc | 2.77e-05 | 8      | Known | (62)         |
| 22 | M90RH | 7m         | STPc | 4.15e-05 | 12     | Known | (64, 78)     |
| 22 | M90RH | STPr       | STPc | 1.47e-02 | 4240   | Known | (3, 78-79)   |
| 22 | M90RH | STPi       | STPc | 4.19e-01 | 121034 | Known | (3, 78-79)   |
| 22 | M90RH | TPt        | STPc | 4.48e-02 | 12956  | Known | (78)         |
| 22 | M90RH | PGa        | STPc | 1.17e-02 | 3382   | Known | (78-79)      |
| 22 | M90RH | IPa        | STPc | 6.04e-03 | 1744   | Known | (78)         |
| 22 | M90RH | FST        | STPc | 6.09e-03 | 1760   | Known | (3)          |
| 22 | M90RH | MST        | STPc | 1.81e-01 | 52360  | Known | (3, 20, 78)  |
| 22 | M90RH | MT         | STPc | 7.20e-04 | 208    | Known | (79)         |
| 22 | M90RH | TEO        | STPc | 1.66e-04 | 48     | NFP   | NA           |
| 22 | M90RH | TEOm       | STPc | 3.05e-04 | 88     | NFP   | NA           |
| 22 | M90RH | PERI       | STPc | 6.51e-04 | 188    | Known | (25)         |
| 22 | M90RH | TEad       | STPc | 7.47e-04 | 216    | NFP   | NA           |
| 22 | M90RH | TEav       | STPc | 3.88e-04 | 112    | Known | (78)         |
| 22 | M90RH | TEpd       | STPc | 7.89e-04 | 228    | NFP   | NA           |
| 22 | M90RH | TEpv       | STPc | 1.40e-03 | 404    | NFP   | NA           |
| 22 | M90RH | TEa/ma     | STPc | 5.12e-04 | 148    | NFP   | NA           |
| 22 | M90RH | TEa/mp     | STPc | 3.74e-04 | 108    | NFP   | NA           |
| 22 | M90RH | ENTO       | STPc | 5.81e-04 | 168    | NFP   | NA           |
| 22 | M90RH | TH/TF      | STPc | 9.14e-03 | 2640   | Known | (3, 25, 78)  |
| 22 | M90RH | SUB        | STPc | 3.53e-04 | 102    | NFP   | NA           |
| 22 | M90RH | POLE       | STPc | 3.77e-03 | 1088   | Known | (79)         |
| 22 | M90RH | CORE       | STPc | 1.30e-02 | 3768   | NFP   | NA           |
| 22 | M90RH | MB         | STPc | 2.38e-02 | 6870   | Known | (78)         |
| 22 | M90RH | LB         | STPc | 5.58e-02 | 16124  | NFP   | NA           |
| 22 | M90RH | PBr        | STPc | 1.99e-02 | 5736   | Known | (78)         |
| 22 | M90RH | PBc        | STPc | 9.00e-02 | 26006  | Known | (76, 78)     |
| 22 | M90RH | Parainsula | STPc | 2.15e-04 | 62     | NFP   | NA           |
| 22 | M90RH | INSULA     | STPc | 1.96e-02 | 5678   | Known | (78)         |
| 22 | M90RH | 2          | STPc | 6.92e-05 | 20     | NFP   | NA           |
| 22 | M90RH | 23         | STPc | 3.09e-03 | 892    | Known | (42, 45, 78) |
| 22 | M90RH | 24b        | STPc | 4.57e-04 | 132    | NFP   | NA           |
| 22 | M90RH | 24c        | STPc | 1.38e-05 | 4      | NFP   | NA           |

|    |        |            |      |          |        |       |                        |
|----|--------|------------|------|----------|--------|-------|------------------------|
| 22 | M90RH  | 29/30      | STPc | 3.32e-04 | 96     | Known | (64)                   |
| 22 | M90RH  | 31         | STPc | 1.74e-03 | 504    | Known | (78)                   |
| 22 | M90RH  | F7         | STPc | 7.47e-04 | 216    | NFP   | NA                     |
| 22 | M90RH  | F6         | STPc | 1.38e-05 | 4      | NFP   | NA                     |
| 22 | M90RH  | F5         | STPc | 1.01e-03 | 292    | NFP   | NA                     |
| 22 | M90RH  | 10         | STPc | 1.43e-03 | 412    | NFP   | NA                     |
| 22 | M90RH  | 9          | STPc | 2.77e-05 | 8      | NFP   | NA                     |
| 22 | M90RH  | 46d        | STPc | 6.87e-03 | 1984   | Known | (3, 39)                |
| 22 | M90RH  | 46v        | STPc | 2.99e-03 | 864    | Known | (3, 39)                |
| 22 | M90RH  | 9/46d      | STPc | 2.24e-03 | 648    | Known | (39)                   |
| 22 | M90RH  | 8B         | STPc | 8.03e-04 | 232    | Known | (39)                   |
| 22 | M90RH  | 8l         | STPc | 4.84e-04 | 140    | Known | (3, 39)                |
| 22 | M90RH  | 8m         | STPc | 6.88e-03 | 1988   | Known | (3, 22, 39, 47)        |
| 22 | M90RH  | 8r         | STPc | 6.78e-04 | 196    | Known | (3, 39)                |
| 22 | M90RH  | 45B        | STPc | 7.47e-04 | 216    | Known | (3)                    |
| 22 | M90RH  | 45A        | STPc | 1.38e-05 | 4      | Known | (39)                   |
| 22 | M90RH  | 12         | STPc | 4.08e-03 | 1180   | Known | (39)                   |
| 22 | M90RH  | 13         | STPc | 2.22e-03 | 642    | NFP   | NA                     |
| 23 | M108LH | V2         | PBr  | 1.12e-05 | 4      | NFP   | NA                     |
| 23 | M108LH | V4         | PBr  | 2.24e-05 | 8      | NFP   | NA                     |
| 23 | M108LH | Pro.St.    | PBr  | 6.21e-03 | 2219   | NFP   | NA                     |
| 23 | M108LH | 7A         | PBr  | 2.24e-05 | 8      | NFP   | NA                     |
| 23 | M108LH | LIP        | PBr  | 8.39e-06 | 3      | NFP   | NA                     |
| 23 | M108LH | DP         | PBr  | 5.59e-05 | 20     | NFP   | NA                     |
| 23 | M108LH | 7m         | PBr  | 2.13e-04 | 76     | NFP   | NA                     |
| 23 | M108LH | STPr       | PBr  | 6.96e-02 | 24873  | Known | (65, 80, 82-83)        |
| 23 | M108LH | STPi       | PBr  | 2.89e-01 | 103294 | Known | (19, 65, 80, 82-83)    |
| 23 | M108LH | STPc       | PBr  | 6.18e-02 | 22105  | Known | (19, 65, 79-80, 82-83) |
| 23 | M108LH | TPt        | PBr  | 7.38e-04 | 264    | Known | (82)                   |
| 23 | M108LH | PGa        | PBr  | 2.42e-03 | 866    | Known | (65, 83)               |
| 23 | M108LH | IPa        | PBr  | 6.43e-05 | 23     | Known | (83)                   |
| 23 | M108LH | FST        | PBr  | 1.01e-04 | 36     | Known | (83)                   |
| 23 | M108LH | MST        | PBr  | 1.09e-04 | 39     | NFP   | NA                     |
| 23 | M108LH | PERI       | PBr  | 1.18e-03 | 423    | Known | (25)                   |
| 23 | M108LH | ENTO       | PBr  | 7.84e-03 | 2803   | NFP   | NA                     |
| 23 | M108LH | TH/TF      | PBr  | 2.49e-02 | 8918   | Known | (25)                   |
| 23 | M108LH | SUB        | PBr  | 2.80e-05 | 10     | NFP   | NA                     |
| 23 | M108LH | POLE       | PBr  | 1.40e-01 | 49969  | Known | (38, 80, 82-83)        |
| 23 | M108LH | CORE       | PBr  | 8.21e-02 | 29350  | Known | (82-83)                |
| 23 | M108LH | MB         | PBr  | 9.18e-02 | 32822  | Known | (80, 82-83)            |
| 23 | M108LH | LB         | PBr  | 4.88e-02 | 17456  | Known | (80, 82-83)            |
| 23 | M108LH | PBc        | PBr  | 9.70e-02 | 34695  | Known | (80, 82-83)            |
| 23 | M108LH | Parainsula | PBr  | 7.58e-03 | 2709   | Known | (83)                   |
| 23 | M108LH | INSULA     | PBr  | 1.31e-03 | 467    | Known | (80, 82-83)            |
| 23 | M108LH | 23         | PBr  | 1.26e-02 | 4490   | Known | (42, 84)               |

|    |        |         |      |          |       |       |                  |
|----|--------|---------|------|----------|-------|-------|------------------|
| 23 | M108LH | 24a     | PBr  | 1.23e-03 | 440   | NFP   | NA               |
| 23 | M108LH | 24b     | PBr  | 1.03e-03 | 367   | Known | (38)             |
| 23 | M108LH | 24c     | PBr  | 1.09e-04 | 39    | Known | (38, 85)         |
| 23 | M108LH | 24d     | PBr  | 2.24e-05 | 8     | NFP   | NA               |
| 23 | M108LH | 29/30   | PBr  | 7.86e-03 | 2812  | NFP   | NA               |
| 23 | M108LH | 31      | PBr  | 1.79e-03 | 639   | NFP   | NA               |
| 23 | M108LH | 32      | PBr  | 2.60e-03 | 931   | Known | (38, 45, 81, 85) |
| 23 | M108LH | F7      | PBr  | 1.31e-04 | 47    | Known | (38)             |
| 23 | M108LH | F6      | PBr  | 2.24e-05 | 8     | NFP   | NA               |
| 23 | M108LH | ProM    | PBr  | 8.39e-06 | 3     | NFP   | NA               |
| 23 | M108LH | 10      | PBr  | 8.73e-03 | 3121  | Known | (38, 40, 81, 85) |
| 23 | M108LH | 9       | PBr  | 1.23e-03 | 440   | Known | (38, 45, 85)     |
| 23 | M108LH | 46d     | PBr  | 4.12e-03 | 1474  | Known | (38, 40, 85)     |
| 23 | M108LH | 46v     | PBr  | 8.53e-04 | 305   | Known | (85)             |
| 23 | M108LH | 9/46d   | PBr  | 4.07e-03 | 1456  | Known | (38, 40, 85)     |
| 23 | M108LH | 8B      | PBr  | 8.98e-04 | 321   | NFP   | NA               |
| 23 | M108LH | 8l      | PBr  | 2.80e-06 | 1     | NFP   | NA               |
| 23 | M108LH | 8m      | PBr  | 4.36e-04 | 156   | Known | (38, 40)         |
| 23 | M108LH | 8r      | PBr  | 5.59e-06 | 2     | NFP   | NA               |
| 23 | M108LH | 45B     | PBr  | 5.03e-05 | 18    | NFP   | NA               |
| 23 | M108LH | 45A     | PBr  | 3.69e-04 | 132   | Known | (38)             |
| 23 | M108LH | OPRO    | PBr  | 3.83e-03 | 1369  | Known | (38, 85)         |
| 23 | M108LH | OPAI    | PBr  | 2.50e-03 | 893   | Known | (38, 85)         |
| 23 | M108LH | 11      | PBr  | 6.82e-04 | 244   | Known | (81, 85)         |
| 23 | M108LH | 14      | PBr  | 1.34e-04 | 48    | Known | (38, 40, 85)     |
| 23 | M108LH | 25      | PBr  | 1.09e-03 | 389   | Known | (38, 85)         |
| 23 | M108LH | 12      | PBr  | 7.80e-03 | 2788  | Known | (38, 40, 85)     |
| 23 | M108LH | 13      | PBr  | 2.98e-03 | 1067  | Known | (38, 40, 85)     |
| 23 | M108LH | PIRI    | PBr  | 2.85e-04 | 102   | NFP   | NA               |
| 24 | M128LH | V2      | TEpd | 1.75e-04 | 70    | Known | (86)             |
| 24 | M128LH | V3      | TEpd | 1.90e-04 | 76    | NFP   | NA               |
| 24 | M128LH | V3A     | TEpd | 3.51e-04 | 140   | NFP   | NA               |
| 24 | M128LH | V4      | TEpd | 2.74e-02 | 10928 | Known | (3, 27, 86)      |
| 24 | M128LH | V4t     | TEpd | 5.76e-05 | 23    | Known | (27, 86)         |
| 24 | M128LH | Pro.St. | TEpd | 5.01e-05 | 20    | NFP   | NA               |
| 24 | M128LH | 7A      | TEpd | 2.02e-03 | 806   | Known | (3, 29)          |
| 24 | M128LH | LIP     | TEpd | 2.83e-03 | 1128  | Known | (86)             |
| 24 | M128LH | PIP     | TEpd | 1.10e-04 | 44    | NFP   | NA               |
| 24 | M128LH | DP      | TEpd | 8.02e-05 | 32    | NFP   | NA               |
| 24 | M128LH | STPr    | TEpd | 4.29e-04 | 171   | Known | (3)              |
| 24 | M128LH | STPi    | TEpd | 2.51e-05 | 10    | NFP   | NA               |
| 24 | M128LH | STPc    | TEpd | 5.01e-06 | 2     | NFP   | NA               |
| 24 | M128LH | PGa     | TEpd | 4.44e-04 | 177   | Known | (27, 65)         |
| 24 | M128LH | IPa     | TEpd | 6.35e-03 | 2532  | Known | (27, 65)         |
| 24 | M128LH | FST     | TEpd | 1.05e-03 | 417   | Known | (27, 65, 86)     |

|    |        |            |      |          |        |       |                     |
|----|--------|------------|------|----------|--------|-------|---------------------|
| 24 | M128LH | MST        | TEpd | 1.00e-05 | 4      | Known | (86)                |
| 24 | M128LH | MT         | TEpd | 1.50e-05 | 6      | Known | (65, 86)            |
| 24 | M128LH | TEO        | TEpd | 1.38e-01 | 54911  | Known | (3, 27, 86)         |
| 24 | M128LH | TEOm       | TEpd | 1.74e-02 | 6952   | Known | (19, 65, 86-87)     |
| 24 | M128LH | PERI       | TEpd | 3.51e-02 | 13992  | Known | (25, 66)            |
| 24 | M128LH | TEad       | TEpd | 2.69e-01 | 107159 | Known | (32)                |
| 24 | M128LH | TEav       | TEpd | 1.15e-01 | 45866  | Known | (32)                |
| 24 | M128LH | TEpv       | TEpd | 3.90e-02 | 15545  | Known | (86)                |
| 24 | M128LH | TEa/ma     | TEpd | 6.52e-02 | 25999  | Known | (65)                |
| 24 | M128LH | TEa/mp     | TEpd | 2.44e-01 | 97279  | Known | (65, 86)            |
| 24 | M128LH | ENTO       | TEpd | 3.43e-04 | 137    | Known | (66)                |
| 24 | M128LH | TH/TF      | TEpd | 1.62e-02 | 6460   | Known | (3, 25, 66)         |
| 24 | M128LH | POLE       | TEpd | 1.17e-03 | 467    | Known | (66)                |
| 24 | M128LH | CORE       | TEpd | 7.52e-06 | 3      | NFP   | NA                  |
| 24 | M128LH | MB         | TEpd | 5.01e-06 | 2      | NFP   | NA                  |
| 24 | M128LH | LB         | TEpd | 1.50e-05 | 6      | NFP   | NA                  |
| 24 | M128LH | PBr        | TEpd | 6.01e-05 | 24     | NFP   | NA                  |
| 24 | M128LH | Parainsula | TEpd | 5.01e-06 | 2      | NFP   | NA                  |
| 24 | M128LH | INSULA     | TEpd | 7.77e-05 | 31     | NFP   | NA                  |
| 24 | M128LH | SII        | TEpd | 4.94e-04 | 197    | NFP   | NA                  |
| 24 | M128LH | 3          | TEpd | 5.01e-06 | 2      | NFP   | NA                  |
| 24 | M128LH | 23         | TEpd | 7.52e-06 | 3      | NFP   | NA                  |
| 24 | M128LH | 24a        | TEpd | 2.71e-04 | 108    | NFP   | NA                  |
| 24 | M128LH | 24b        | TEpd | 3.51e-05 | 14     | NFP   | NA                  |
| 24 | M128LH | F6         | TEpd | 1.50e-05 | 6      | NFP   | NA                  |
| 24 | M128LH | F5         | TEpd | 7.52e-06 | 3      | NFP   | NA                  |
| 24 | M128LH | 46d        | TEpd | 1.50e-05 | 6      | Known | (3, 33)             |
| 24 | M128LH | 46v        | TEpd | 4.09e-04 | 163    | Known | (26, 38)            |
| 24 | M128LH | 9/46v      | TEpd | 1.42e-03 | 566    | Known | (26, 38, 86)        |
| 24 | M128LH | 8l         | TEpd | 4.59e-03 | 1833   | Known | (33, 38, 86)        |
| 24 | M128LH | 8m         | TEpd | 2.51e-05 | 10     | Known | (3)                 |
| 24 | M128LH | 8r         | TEpd | 1.92e-03 | 766    | Known | (33, 86)            |
| 24 | M128LH | 45B        | TEpd | 6.49e-03 | 2588   | Known | (26, 33, 38, 86)    |
| 24 | M128LH | 45A        | TEpd | 9.42e-04 | 376    | Known | (33, 38, 86)        |
| 24 | M128LH | 44         | TEpd | 2.76e-05 | 11     | Known | (33, 38)            |
| 24 | M128LH | OPRO       | TEpd | 8.02e-05 | 32     | Known | (38)                |
| 24 | M128LH | OPAI       | TEpd | 1.00e-05 | 4      | Known | (38)                |
| 24 | M128LH | 11         | TEpd | 3.51e-05 | 14     | NFP   | NA                  |
| 24 | M128LH | 12         | TEpd | 1.82e-03 | 727    | Known | (3, 26, 33, 38, 86) |
| 24 | M128LH | 13         | TEpd | 3.41e-04 | 136    | Known | (38)                |
| 24 | M128LH | PIRI       | TEpd | 8.02e-05 | 32     | NFP   | NA                  |
| 25 | NICO   | 7op        | 24c  | 3.49e-03 | 252    | Known | (35, 88)            |
| 25 | NICO   | 7A         | 24c  | 7.96e-03 | 575    | Known | (37, 88)            |
| 25 | NICO   | 7B         | 24c  | 4.32e-03 | 312    | Known | (36, 88)            |
| 25 | NICO   | LIP        | 24c  | 2.22e-04 | 16     | NFP   | NA                  |

|    |      |        |     |          |       |       |                  |
|----|------|--------|-----|----------|-------|-------|------------------|
| 25 | NICO | VIP    | 24c | 1.38e-04 | 10    | Known | (88)             |
| 25 | NICO | MIP    | 24c | 8.24e-03 | 595   | NFP   | NA               |
| 25 | NICO | V6     | 24c | 1.38e-04 | 10    | NFP   | NA               |
| 25 | NICO | V6A    | 24c | 8.06e-03 | 582   | NFP   | NA               |
| 25 | NICO | 5      | 24c | 2.56e-02 | 1847  | Known | (88)             |
| 25 | NICO | 7m     | 24c | 1.95e-02 | 1410  | Known | (88-89)          |
| 25 | NICO | STPr   | 24c | 2.77e-05 | 2     | Known | (38, 64, 88)     |
| 25 | NICO | STPi   | 24c | 4.15e-05 | 3     | Known | (88)             |
| 25 | NICO | STPc   | 24c | 1.52e-04 | 11    | Known | (88)             |
| 25 | NICO | IPa    | 24c | 2.77e-05 | 2     | Known | (88)             |
| 25 | NICO | MST    | 24c | 1.66e-04 | 12    | Known | (88)             |
| 25 | NICO | TEpv   | 24c | 2.77e-05 | 2     | NFP   | NA               |
| 25 | NICO | CORE   | 24c | 2.77e-05 | 2     | NFP   | NA               |
| 25 | NICO | LB     | 24c | 2.77e-05 | 2     | NFP   | NA               |
| 25 | NICO | INSULA | 24c | 1.75e-02 | 1263  | Known | (88-89)          |
| 25 | NICO | SII    | 24c | 2.80e-03 | 202   | Known | (88-89)          |
| 25 | NICO | 1      | 24c | 2.77e-05 | 2     | Known | (88)             |
| 25 | NICO | 2      | 24c | 2.24e-03 | 162   | Known | (88)             |
| 25 | NICO | 3      | 24c | 5.26e-04 | 38    | Known | (90)             |
| 25 | NICO | 23     | 24c | 2.40e-02 | 1733  | Known | (45, 88-91)      |
| 25 | NICO | 24a    | 24c | 4.36e-03 | 315   | Known | (88-89, 91-92)   |
| 25 | NICO | 24b    | 24c | 1.18e-01 | 8557  | Known | (88-89, 91-92)   |
| 25 | NICO | 24d    | 24c | 1.02e-01 | 7340  | Known | (88-92)          |
| 25 | NICO | 29/30  | 24c | 4.15e-05 | 3     | Known | (88-89)          |
| 25 | NICO | 31     | 24c | 3.18e-04 | 23    | Known | (88)             |
| 25 | NICO | 32     | 24c | 1.94e-03 | 140   | Known | (45-46, 88-90)   |
| 25 | NICO | F1     | 24c | 1.12e-02 | 807   | Known | (88, 90-91)      |
| 25 | NICO | F2     | 24c | 4.91e-02 | 3547  | Known | (88, 90-92)      |
| 25 | NICO | F7     | 24c | 8.05e-02 | 5812  | Known | (88, 90-92)      |
| 25 | NICO | F3     | 24c | 1.15e-01 | 8309  | Known | (88, 90-92)      |
| 25 | NICO | F6     | 24c | 2.62e-01 | 18928 | Known | (88, 90-92)      |
| 25 | NICO | F4     | 24c | 3.07e-03 | 222   | Known | (90, 92)         |
| 25 | NICO | F5     | 24c | 2.21e-02 | 1598  | Known | (55, 88, 90-92)  |
| 25 | NICO | ProM   | 24c | 2.20e-03 | 159   | Known | (35, 88, 90)     |
| 25 | NICO | 10     | 24c | 1.52e-04 | 11    | Known | (46, 88, 90)     |
| 25 | NICO | 9      | 24c | 1.33e-02 | 964   | Known | (46, 88, 90, 92) |
| 25 | NICO | 46d    | 24c | 4.85e-04 | 35    | Known | (88, 90, 92)     |
| 25 | NICO | 46v    | 24c | 2.31e-03 | 167   | Known | (88, 90, 92)     |
| 25 | NICO | 9/46d  | 24c | 5.11e-03 | 369   | Known | (88, 90-92)      |
| 25 | NICO | 9/46v  | 24c | 7.48e-04 | 54    | Known | (44, 88, 92)     |
| 25 | NICO | 8B     | 24c | 4.29e-02 | 3096  | Known | (47, 88, 90, 92) |
| 25 | NICO | 8l     | 24c | 8.31e-05 | 6     | Known | (92)             |
| 25 | NICO | 8m     | 24c | 2.77e-05 | 2     | Known | (88, 90, 92)     |
| 25 | NICO | 8r     | 24c | 2.77e-05 | 2     | Known | (90, 92)         |
| 25 | NICO | 45B    | 24c | 8.31e-05 | 6     | Known | (92)             |



|    |        |        |     |          |       |       |                                       |
|----|--------|--------|-----|----------|-------|-------|---------------------------------------|
| 25 | NICO   | 44     | 24c | 1.60e-02 | 1158  | Known | (88, 90, 92)                          |
| 25 | NICO   | OPRO   | 24c | 6.37e-04 | 46    | Known | (46, 88-90)                           |
| 25 | NICO   | 11     | 24c | 4.15e-05 | 3     | Known | (46, 88, 90, 92-93)                   |
| 25 | NICO   | 12     | 24c | 2.08e-02 | 1500  | Known | (44, 46, 88, 90, 92)                  |
| 26 | M69LH  | 7op    | F1  | 6.60e-03 | 586   | Known | (94)                                  |
| 26 | M69LH  | 7A     | F1  | 3.60e-04 | 32    | Known | (51, 94-95)                           |
| 26 | M69LH  | 5      | F1  | 1.09e-01 | 9683  | Known | (3, 37, 51, 70, 88, 94-97)            |
| 26 | M69LH  | STPc   | F1  | 9.00e-05 | 8     | Known | (94)                                  |
| 26 | M69LH  | MST    | F1  | 1.91e-04 | 17    | NFP   | NA                                    |
| 26 | M69LH  | MB     | F1  | 3.15e-04 | 28    | Known | (51)                                  |
| 26 | M69LH  | INSULA | F1  | 2.66e-03 | 236   | Known | (51, 88, 94, 96, 98)                  |
| 26 | M69LH  | 1      | F1  | 1.22e-03 | 108   | Known | (51, 70, 88, 94, 97-98)               |
| 26 | M69LH  | 2      | F1  | 1.25e-01 | 11148 | Known | (3, 50-51, 70, 88, 94-99)             |
| 26 | M69LH  | 3      | F1  | 9.93e-03 | 882   | Known | (50-51, 69-70, 88, 94, 96-100)        |
| 26 | M69LH  | 23     | F1  | 3.21e-02 | 2848  | Known | (88, 90, 94, 98)                      |
| 26 | M69LH  | 24b    | F1  | 4.24e-03 | 377   | Known | (50-51, 94, 96, 100)                  |
| 26 | M69LH  | 24c    | F1  | 4.32e-03 | 384   | Known | (51, 90, 94, 96-97, 100-101)          |
| 26 | M69LH  | 24d    | F1  | 2.08e-02 | 1845  | Known | (50-51, 88, 90, 94, 96, 101)          |
| 26 | M69LH  | 29/30  | F1  | 4.50e-05 | 4     | Known | (94)                                  |
| 26 | M69LH  | F2     | F1  | 4.02e-01 | 35723 | Known | (3, 51, 55, 88, 90, 94, 96)           |
| 26 | M69LH  | F7     | F1  | 3.34e-03 | 297   | Known | (3, 51, 88, 94)                       |
| 26 | M69LH  | F3     | F1  | 2.30e-01 | 20431 | Known | (3, 50-51, 90, 94, 96-98, 100-101)    |
| 26 | M69LH  | F6     | F1  | 7.80e-03 | 693   | Known | (51, 94)                              |
| 26 | M69LH  | F4     | F1  | 2.94e-02 | 2615  | Known | (3, 50-51, 90, 94, 96-97, 100)        |
| 26 | M69LH  | F5     | F1  | 9.00e-03 | 800   | Known | (3, 50-51, 55, 90, 94, 97-98, 100)    |
| 26 | M69LH  | ProM   | F1  | 3.60e-04 | 32    | Known | (50, 90, 94, 100)                     |
| 26 | M69LH  | 9      | F1  | 4.50e-05 | 4     | NFP   | NA                                    |
| 26 | M69LH  | 8B     | F1  | 3.60e-04 | 32    | Known | (94)                                  |
| 26 | M69LH  | 8m     | F1  | 4.50e-05 | 4     | Known | (94)                                  |
| 26 | M69LH  | 44     | F1  | 4.05e-04 | 36    | Known | (50-51, 94)                           |
| 27 | M102LH | 7op    | F2  | 1.24e-02 | 1417  | Known | (35, 102-103)                         |
| 27 | M102LH | 7A     | F2  | 8.33e-03 | 951   | Known | (34, 36-37, 52, 104)                  |
| 27 | M102LH | 7B     | F2  | 5.25e-05 | 6     | Known | (34, 52, 73, 102-103)                 |
| 27 | M102LH | LIP    | F2  | 7.01e-05 | 8     | Known | (52, 102, 104)                        |
| 27 | M102LH | VIP    | F2  | 7.88e-05 | 9     | Known | (52, 73, 102-103)                     |
| 27 | M102LH | MIP    | F2  | 2.21e-03 | 252   | Known | (34, 52, 73, 95, 99, 102-103)         |
| 27 | M102LH | AIP    | F2  | 5.25e-05 | 6     | Known | (34, 52, 73, 99)                      |
| 27 | M102LH | 5      | F2  | 1.88e-02 | 2146  | Known | (34, 37, 52, 70, 73, 88, 99, 102-103) |
| 27 | M102LH | 7m     | F2  | 7.47e-03 | 853   | Known | (34, 37, 52, 73, 88, 95, 99, 102-103) |
| 27 | M102LH | STPr   | F2  | 4.38e-05 | 5     | NFP   | NA                                    |
| 27 | M102LH | STPi   | F2  | 4.47e-04 | 51    | Known | (39)                                  |
| 27 | M102LH | STPc   | F2  | 3.77e-04 | 43    | Known | (104)                                 |
| 27 | M102LH | TPt    | F2  | 1.35e-02 | 1546  | Known | (88, 104)                             |
| 27 | M102LH | PGa    | F2  | 1.23e-04 | 14    | NFP   | NA                                    |

|    |        |            |    |          |       |       |                                    |
|----|--------|------------|----|----------|-------|-------|------------------------------------|
| 27 | M102LH | IPa        | F2 | 5.25e-05 | 6     | NFP   | NA                                 |
| 27 | M102LH | MST        | F2 | 4.03e-04 | 46    | Known | (104)                              |
| 27 | M102LH | MT         | F2 | 8.76e-06 | 1     | NFP   | NA                                 |
| 27 | M102LH | PERI       | F2 | 3.50e-05 | 4     | NFP   | NA                                 |
| 27 | M102LH | TEa/ma     | F2 | 5.25e-05 | 6     | NFP   | NA                                 |
| 27 | M102LH | POLE       | F2 | 2.63e-05 | 3     | NFP   | NA                                 |
| 27 | M102LH | MB         | F2 | 3.07e-04 | 35    | NFP   | NA                                 |
| 27 | M102LH | PBr        | F2 | 6.13e-05 | 7     | NFP   | NA                                 |
| 27 | M102LH | Parainsula | F2 | 9.63e-05 | 11    | Known | (88)                               |
| 27 | M102LH | INSULA     | F2 | 6.48e-03 | 740   | Known | (88, 92)                           |
| 27 | M102LH | SII        | F2 | 5.25e-05 | 6     | Known | (52, 88)                           |
| 27 | M102LH | 3          | F2 | 5.80e-03 | 662   | Known | (52, 103)                          |
| 27 | M102LH | 23         | F2 | 8.35e-02 | 9530  | Known | (34, 52, 88, 99, 103, 105)         |
| 27 | M102LH | 24a        | F2 | 3.15e-04 | 36    | Known | (88, 105)                          |
| 27 | M102LH | 24b        | F2 | 2.13e-02 | 2429  | Known | (34, 88, 103, 105)                 |
| 27 | M102LH | 24c        | F2 | 3.12e-02 | 3567  | Known | (34, 73, 88, 102-103, 105)         |
| 27 | M102LH | 24d        | F2 | 1.35e-01 | 15382 | Known | (34, 55, 73, 88, 102-103, 105)     |
| 27 | M102LH | 31         | F2 | 1.05e-04 | 12    | Known | (34, 88)                           |
| 27 | M102LH | F1         | F2 | 1.63e-01 | 18590 | Known | (34, 52, 55, 73, 88, 102-103, 105) |
| 27 | M102LH | F7         | F2 | 2.43e-02 | 2770  | Known | (34, 55, 73, 88, 102-103, 105)     |
| 27 | M102LH | F3         | F2 | 3.40e-01 | 38856 | Known | (34, 55, 73, 88, 102-103, 105)     |
| 27 | M102LH | F6         | F2 | 7.54e-02 | 8612  | Known | (34, 55, 73, 88, 103, 105)         |
| 27 | M102LH | F4         | F2 | 4.23e-03 | 483   | Known | (73, 88, 105)                      |
| 27 | M102LH | F5         | F2 | 4.19e-02 | 4788  | Known | (73, 102-103, 105)                 |
| 27 | M102LH | ProM       | F2 | 7.88e-05 | 9     | NFP   | NA                                 |
| 27 | M102LH | 46v        | F2 | 4.55e-04 | 52    | Known | (105)                              |
| 27 | M102LH | 9/46d      | F2 | 1.66e-04 | 19    | Known | (34, 47, 103, 105)                 |
| 27 | M102LH | 9/46v      | F2 | 2.54e-04 | 29    | Known | (88, 92)                           |
| 27 | M102LH | 8B         | F2 | 1.31e-04 | 15    | Known | (34, 47, 55, 88, 103, 105)         |
| 27 | M102LH | 8l         | F2 | 1.75e-05 | 2     | Known | (73, 102)                          |
| 27 | M102LH | 8m         | F2 | 2.54e-04 | 29    | Known | (44, 47, 73, 88, 102)              |
| 27 | M102LH | 8r         | F2 | 2.63e-05 | 3     | Known | (105)                              |
| 27 | M102LH | 45B        | F2 | 4.38e-05 | 5     | NFP   | NA                                 |
| 27 | M102LH | 44         | F2 | 6.83e-04 | 78    | Known | (73)                               |
| 27 | M102LH | OPRO       | F2 | 2.45e-04 | 28    | NFP   | NA                                 |
| 27 | M102LH | 12         | F2 | 1.23e-04 | 14    | NFP   | NA                                 |
| 27 | M102LH | 13         | F2 | 7.01e-05 | 8     | NFP   | NA                                 |
| 28 | M102LH | V2         | F7 | 9.04e-05 | 8     | NFP   | NA                                 |
| 28 | M102LH | 7op        | F7 | 3.84e-04 | 34    | Known | (35, 88, 106)                      |
| 28 | M102LH | 7A         | F7 | 2.12e-03 | 188   | Known | (36-37, 73, 102)                   |
| 28 | M102LH | 7B         | F7 | 5.65e-05 | 5     | Known | (73, 88, 106)                      |
| 28 | M102LH | LIP        | F7 | 4.41e-04 | 39    | Known | (88, 99, 106)                      |
| 28 | M102LH | VIP        | F7 | 1.13e-05 | 1     | NFP   | NA                                 |
| 28 | M102LH | 5          | F7 | 2.26e-05 | 2     | Known | (37, 73, 102)                      |
| 28 | M102LH | 7m         | F7 | 5.63e-03 | 498   | Known | (37, 73, 88, 99, 102)              |

|    |        |            |    |          |       |       |                               |
|----|--------|------------|----|----------|-------|-------|-------------------------------|
| 28 | M102LH | STPr       | F7 | 6.58e-03 | 582   | Known | (88, 104, 106)                |
| 28 | M102LH | STPi       | F7 | 1.17e-02 | 1033  | Known | (88, 104, 106)                |
| 28 | M102LH | STPc       | F7 | 1.84e-03 | 163   | Known | (39, 88, 99, 102, 104, 106)   |
| 28 | M102LH | TPt        | F7 | 1.74e-03 | 154   | Known | (88, 106)                     |
| 28 | M102LH | PGa        | F7 | 2.86e-03 | 253   | Known | (88, 99, 104, 106)            |
| 28 | M102LH | IPa        | F7 | 2.98e-03 | 264   | Known | (88, 99, 104)                 |
| 28 | M102LH | FST        | F7 | 7.91e-05 | 7     | Known | (99, 104, 106)                |
| 28 | M102LH | MST        | F7 | 6.33e-04 | 56    | Known | (99, 106)                     |
| 28 | M102LH | TEO        | F7 | 4.52e-05 | 4     | NFP   | NA                            |
| 28 | M102LH | PERI       | F7 | 5.65e-05 | 5     | NFP   | NA                            |
| 28 | M102LH | TEav       | F7 | 6.78e-05 | 6     | NFP   | NA                            |
| 28 | M102LH | TEa/ma     | F7 | 9.15e-04 | 81    | Known | (104)                         |
| 28 | M102LH | TEa/mp     | F7 | 2.26e-05 | 2     | Known | (104)                         |
| 28 | M102LH | POLE       | F7 | 5.99e-04 | 53    | Known | (88)                          |
| 28 | M102LH | MB         | F7 | 1.58e-03 | 140   | NFP   | NA                            |
| 28 | M102LH | PBr        | F7 | 2.55e-03 | 226   | NFP   | NA                            |
| 28 | M102LH | PBc        | F7 | 2.26e-05 | 2     | Known | (106)                         |
| 28 | M102LH | Parainsula | F7 | 5.65e-04 | 50    | Known | (88)                          |
| 28 | M102LH | INSULA     | F7 | 2.46e-03 | 218   | Known | (88, 106)                     |
| 28 | M102LH | SII        | F7 | 2.26e-05 | 2     | Known | (88)                          |
| 28 | M102LH | 1          | F7 | 1.13e-05 | 1     | NFP   | NA                            |
| 28 | M102LH | 3          | F7 | 1.13e-04 | 10    | NFP   | NA                            |
| 28 | M102LH | 23         | F7 | 3.04e-02 | 2691  | Known | (42, 73, 88, 99, 106)         |
| 28 | M102LH | 24a        | F7 | 1.08e-02 | 956   | Known | (88, 105-106)                 |
| 28 | M102LH | 24b        | F7 | 6.48e-02 | 5733  | Known | (88, 102, 105-106)            |
| 28 | M102LH | 24c        | F7 | 9.32e-02 | 8249  | Known | (55, 73, 88, 102, 105-106)    |
| 28 | M102LH | 24d        | F7 | 1.78e-02 | 1578  | Known | (88, 102, 105-106)            |
| 28 | M102LH | 31         | F7 | 4.84e-03 | 428   | Known | (88)                          |
| 28 | M102LH | 32         | F7 | 2.49e-04 | 22    | Known | (107)                         |
| 28 | M102LH | F1         | F7 | 2.94e-04 | 26    | Known | (55, 73, 88, 106)             |
| 28 | M102LH | F2         | F7 | 9.72e-02 | 8602  | Known | (55, 73, 88, 102, 105-106)    |
| 28 | M102LH | F3         | F7 | 1.01e-02 | 890   | Known | (55, 88, 102, 105-106)        |
| 28 | M102LH | F6         | F7 | 2.42e-01 | 21432 | Known | (55, 73, 88, 102, 105-106)    |
| 28 | M102LH | F4         | F7 | 2.72e-03 | 241   | Known | (55, 88, 105-106)             |
| 28 | M102LH | F5         | F7 | 2.14e-03 | 189   | Known | (55, 73, 88, 102, 105)        |
| 28 | M102LH | ProM       | F7 | 1.81e-04 | 16    | Known | (88, 106)                     |
| 28 | M102LH | 10         | F7 | 1.49e-03 | 132   | Known | (107)                         |
| 28 | M102LH | 9          | F7 | 1.16e-01 | 10258 | Known | (55, 88, 105-107)             |
| 28 | M102LH | 46d        | F7 | 9.04e-04 | 80    | Known | (73, 88, 102, 105)            |
| 28 | M102LH | 46v        | F7 | 1.48e-02 | 1312  | Known | (105-106)                     |
| 28 | M102LH | 9/46d      | F7 | 2.51e-02 | 2226  | Known | (47, 73, 88, 102, 105-106)    |
| 28 | M102LH | 9/46v      | F7 | 3.83e-03 | 339   | Known | (88, 106)                     |
| 28 | M102LH | 8B         | F7 | 1.03e-01 | 9106  | Known | (47, 73, 88, 102, 105-106)    |
| 28 | M102LH | 8l         | F7 | 3.19e-03 | 282   | Known | (44, 55, 73, 88, 105-106)     |
| 28 | M102LH | 8m         | F7 | 3.86e-02 | 3413  | Known | (44, 47, 55, 73, 88, 105-106) |

|    |        |        |      |          |       |       |                   |
|----|--------|--------|------|----------|-------|-------|-------------------|
| 28 | M102LH | 8r     | F7   | 2.30e-03 | 204   | Known | (105-106)         |
| 28 | M102LH | 45B    | F7   | 6.39e-03 | 566   | Known | (55, 88, 105-106) |
| 28 | M102LH | 45A    | F7   | 3.47e-02 | 3073  | Known | (105-106)         |
| 28 | M102LH | 44     | F7   | 1.03e-02 | 913   | Known | (55, 88, 105-106) |
| 28 | M102LH | OPRO   | F7   | 1.21e-03 | 107   | Known | (88)              |
| 28 | M102LH | 11     | F7   | 2.71e-04 | 24    | NFP   | NA                |
| 28 | M102LH | 14     | F7   | 2.26e-05 | 2     | NFP   | NA                |
| 28 | M102LH | 12     | F7   | 1.24e-02 | 1100  | Known | (88, 105-106)     |
| 28 | M102LH | 13     | F7   | 2.67e-03 | 236   | Known | (88)              |
| 29 | M98LH  | 7op    | ProM | 5.07e-05 | 9     | NFP   | NA                |
| 29 | M98LH  | 7A     | ProM | 1.69e-05 | 3     | NFP   | NA                |
| 29 | M98LH  | 7B     | ProM | 1.06e-03 | 188   | NFP   | NA                |
| 29 | M98LH  | LIP    | ProM | 6.08e-04 | 108   | NFP   | NA                |
| 29 | M98LH  | AIP    | ProM | 4.34e-03 | 770   | Known | (108)             |
| 29 | M98LH  | PGa    | ProM | 2.25e-05 | 4     | NFP   | NA                |
| 29 | M98LH  | PERI   | ProM | 1.25e-03 | 222   | Known | (25, 57)          |
| 29 | M98LH  | TEav   | ProM | 3.83e-04 | 68    | NFP   | NA                |
| 29 | M98LH  | TEa/ma | ProM | 1.15e-03 | 204   | Known | (38)              |
| 29 | M98LH  | ENTO   | ProM | 2.25e-03 | 400   | NFP   | NA                |
| 29 | M98LH  | POLE   | ProM | 2.16e-03 | 383   | Known | (54)              |
| 29 | M98LH  | MB     | ProM | 2.25e-05 | 4     | NFP   | NA                |
| 29 | M98LH  | INSULA | ProM | 2.50e-02 | 4431  | Known | (35)              |
| 29 | M98LH  | Gu     | ProM | 1.61e-01 | 28602 | Known | (35)              |
| 29 | M98LH  | SII    | ProM | 2.47e-01 | 43906 | Known | (35)              |
| 29 | M98LH  | 1      | ProM | 2.25e-05 | 4     | Known | (35)              |
| 29 | M98LH  | 2      | ProM | 2.79e-02 | 4958  | Known | (35)              |
| 29 | M98LH  | 3      | ProM | 1.13e-04 | 20    | Known | (35)              |
| 29 | M98LH  | 24a    | ProM | 2.13e-03 | 378   | NFP   | NA                |
| 29 | M98LH  | 24b    | ProM | 3.94e-05 | 7     | Known | (35)              |
| 29 | M98LH  | 24c    | ProM | 2.51e-03 | 446   | Known | (35)              |
| 29 | M98LH  | 24d    | ProM | 1.18e-04 | 21    | Known | (35)              |
| 29 | M98LH  | F1     | ProM | 6.76e-05 | 12    | NFP   | NA                |
| 29 | M98LH  | F2     | ProM | 1.13e-05 | 2     | Known | (35)              |
| 29 | M98LH  | F3     | ProM | 1.57e-03 | 278   | Known | (35)              |
| 29 | M98LH  | F4     | ProM | 3.26e-03 | 578   | Known | (35)              |
| 29 | M98LH  | F5     | ProM | 3.17e-01 | 56218 | Known | (35, 55)          |
| 29 | M98LH  | 9      | ProM | 2.25e-05 | 4     | NFP   | NA                |
| 29 | M98LH  | 46d    | ProM | 1.13e-05 | 2     | NFP   | NA                |
| 29 | M98LH  | 46v    | ProM | 3.15e-04 | 56    | Known | (35)              |
| 29 | M98LH  | 9/46v  | ProM | 2.01e-02 | 3569  | Known | (35, 44, 47)      |
| 29 | M98LH  | 44     | ProM | 1.13e-02 | 2008  | Known | (35)              |
| 29 | M98LH  | OPRO   | ProM | 2.82e-02 | 5016  | Known | (35)              |
| 29 | M98LH  | OPAI   | ProM | 4.07e-03 | 723   | Known | (48)              |
| 29 | M98LH  | 11     | ProM | 5.63e-05 | 10    | NFP   | NA                |
| 29 | M98LH  | 12     | ProM | 1.33e-01 | 23657 | Known | (35, 44)          |

|    |         |        |      |          |      |       |                             |
|----|---------|--------|------|----------|------|-------|-----------------------------|
| 29 | M98LH   | 13     | ProM | 1.66e-03 | 294  | Known | (35, 38, 48)                |
| 30 | BB272RH | V1     | 8l   | 1.43e-04 | 14   | NFP   | NA                          |
| 30 | BB272RH | V2     | 8l   | 3.49e-03 | 342  | Known | (3, 33, 109)                |
| 30 | BB272RH | V3     | 8l   | 5.42e-03 | 531  | Known | (3, 26, 33, 87, 109)        |
| 30 | BB272RH | V3A    | 8l   | 4.29e-04 | 42   | Known | (3, 33, 87, 109)            |
| 30 | BB272RH | V4     | 8l   | 1.21e-02 | 1186 | Known | (3, 26, 33-34, 87, 109)     |
| 30 | BB272RH | V4t    | 8l   | 3.06e-04 | 30   | Known | (3, 26, 33, 87, 109)        |
| 30 | BB272RH | 7op    | 8l   | 1.12e-04 | 11   | Known | (33)                        |
| 30 | BB272RH | 7A     | 8l   | 1.51e-03 | 148  | Known | (3, 33-34, 87)              |
| 30 | BB272RH | 7B     | 8l   | 3.06e-05 | 3    | Known | (29, 33)                    |
| 30 | BB272RH | LIP    | 8l   | 2.92e-02 | 2859 | Known | (3, 26, 33-34, 87, 109)     |
| 30 | BB272RH | VIP    | 8l   | 1.63e-03 | 160  | Known | (3, 33, 109)                |
| 30 | BB272RH | MIP    | 8l   | 8.17e-05 | 8    | Known | (109)                       |
| 30 | BB272RH | PIP    | 8l   | 3.15e-03 | 308  | Known | (33, 109)                   |
| 30 | BB272RH | AIP    | 8l   | 1.02e-04 | 10   | Known | (87)                        |
| 30 | BB272RH | DP     | 8l   | 5.21e-04 | 51   | Known | (33)                        |
| 30 | BB272RH | V6A    | 8l   | 2.15e-04 | 21   | Known | (3, 33)                     |
| 30 | BB272RH | 5      | 8l   | 6.13e-05 | 6    | Known | (34)                        |
| 30 | BB272RH | 7m     | 8l   | 1.02e-04 | 10   | NFP   | NA                          |
| 30 | BB272RH | STPr   | 8l   | 1.40e-03 | 137  | Known | (34, 87)                    |
| 30 | BB272RH | STPi   | 8l   | 5.75e-03 | 563  | Known | (34, 39, 87, 109)           |
| 30 | BB272RH | STPc   | 8l   | 1.21e-02 | 1189 | Known | (3, 33, 39, 87, 109)        |
| 30 | BB272RH | TPt    | 8l   | 4.29e-04 | 42   | Known | (26, 33, 109)               |
| 30 | BB272RH | PGa    | 8l   | 4.89e-03 | 479  | Known | (26, 33-34, 87, 109)        |
| 30 | BB272RH | IPa    | 8l   | 2.02e-03 | 198  | Known | (26, 33-34, 87)             |
| 30 | BB272RH | FST    | 8l   | 3.31e-03 | 324  | Known | (3, 20, 26, 33-34, 87, 109) |
| 30 | BB272RH | MST    | 8l   | 5.40e-03 | 529  | Known | (3, 33, 87, 109)            |
| 30 | BB272RH | MT     | 8l   | 2.03e-02 | 1986 | Known | (3, 26, 33, 87, 109)        |
| 30 | BB272RH | TEO    | 8l   | 1.47e-03 | 144  | Known | (3, 26, 33-34, 87, 109)     |
| 30 | BB272RH | TEOm   | 8l   | 2.63e-03 | 257  | Known | (26, 33, 87, 109)           |
| 30 | BB272RH | PERI   | 8l   | 1.33e-04 | 13   | Known | (57)                        |
| 30 | BB272RH | TEad   | 8l   | 3.06e-05 | 3    | Known | (34, 87, 109)               |
| 30 | BB272RH | TEav   | 8l   | 1.33e-04 | 13   | NFP   | NA                          |
| 30 | BB272RH | TEpd   | 8l   | 1.43e-04 | 14   | Known | (33-34, 87, 109)            |
| 30 | BB272RH | TEpv   | 8l   | 1.28e-03 | 125  | Known | (26, 87, 109)               |
| 30 | BB272RH | TEa/ma | 8l   | 1.33e-04 | 13   | Known | (26, 34, 38, 87)            |
| 30 | BB272RH | TEa/mp | 8l   | 9.19e-05 | 9    | Known | (26, 33-34, 87)             |
| 30 | BB272RH | ENTO   | 8l   | 2.86e-04 | 28   | NFP   | NA                          |
| 30 | BB272RH | TH/TF  | 8l   | 1.27e-03 | 124  | Known | (33, 57, 109)               |
| 30 | BB272RH | SUB    | 8l   | 2.04e-05 | 2    | NFP   | NA                          |
| 30 | BB272RH | POLE   | 8l   | 5.01e-04 | 49   | NFP   | NA                          |
| 30 | BB272RH | CORE   | 8l   | 6.95e-04 | 68   | NFP   | NA                          |
| 30 | BB272RH | MB     | 8l   | 2.02e-03 | 198  | NFP   | NA                          |
| 30 | BB272RH | LB     | 8l   | 4.49e-04 | 44   | Known | (41)                        |
| 30 | BB272RH | PBr    | 8l   | 9.81e-04 | 96   | NFP   | NA                          |

|    |         |            |       |          |         |       |                       |
|----|---------|------------|-------|----------|---------|-------|-----------------------|
| 30 | BB272RH | PBc        | 8l    | 2.00e-03 | 196     | NFP   | NA                    |
| 30 | BB272RH | Parainsula | 8l    | 3.27e-04 | 32      | NFP   | NA                    |
| 30 | BB272RH | INSULA     | 8l    | 9.21e-03 | 902     | Known | (109)                 |
| 30 | BB272RH | Gu         | 8l    | 1.32e-03 | 129     | NFP   | NA                    |
| 30 | BB272RH | SII        | 8l    | 1.31e-03 | 128     | NFP   | NA                    |
| 30 | BB272RH | 2          | 8l    | 2.35e-04 | 23      | NFP   | NA                    |
| 30 | BB272RH | 3          | 8l    | 2.45e-04 | 24      | NFP   | NA                    |
| 30 | BB272RH | 23         | 8l    | 7.56e-04 | 74      | Known | (33-34, 109)          |
| 30 | BB272RH | 24a        | 8l    | 4.17e-03 | 408     | Known | (34, 87)              |
| 30 | BB272RH | 24b        | 8l    | 2.32e-03 | 227     | Known | (87)                  |
| 30 | BB272RH | 24c        | 8l    | 2.42e-03 | 237     | NFP   | NA                    |
| 30 | BB272RH | 24d        | 8l    | 1.05e-03 | 103     | NFP   | NA                    |
| 30 | BB272RH | 29/30      | 8l    | 2.45e-04 | 24      | NFP   | NA                    |
| 30 | BB272RH | 31         | 8l    | 7.15e-05 | 7       | NFP   | NA                    |
| 30 | BB272RH | 32         | 8l    | 1.02e-04 | 10      | NFP   | NA                    |
| 30 | BB272RH | F1         | 8l    | 1.85e-03 | 181     | Known | (109)                 |
| 30 | BB272RH | F2         | 8l    | 1.90e-02 | 1860    | Known | (34)                  |
| 30 | BB272RH | F7         | 8l    | 2.61e-02 | 2552    | Known | (87, 109)             |
| 30 | BB272RH | F3         | 8l    | 2.25e-04 | 22      | NFP   | NA                    |
| 30 | BB272RH | F6         | 8l    | 2.33e-03 | 228     | Known | (34, 87)              |
| 30 | BB272RH | F4         | 8l    | 5.42e-03 | 531     | Known | (87)                  |
| 30 | BB272RH | F5         | 8l    | 1.27e-02 | 1244    | Known | (55)                  |
| 30 | BB272RH | ProM       | 8l    | 1.75e-03 | 171     | Known | (87)                  |
| 30 | BB272RH | 10         | 8l    | 5.31e-04 | 52      | NFP   | NA                    |
| 30 | BB272RH | 9          | 8l    | 2.57e-03 | 252     | Known | (87)                  |
| 30 | BB272RH | 46d        | 8l    | 3.91e-02 | 3825    | Known | (34, 87, 109)         |
| 30 | BB272RH | 46v        | 8l    | 1.11e-02 | 1090    | Known | (34, 87, 109)         |
| 30 | BB272RH | 9/46d      | 8l    | 1.03e-02 | 1005    | Known | (44, 47, 109)         |
| 30 | BB272RH | 9/46v      | 8l    | 2.49e-02 | 2439    | Known | (34, 44, 47, 87)      |
| 30 | BB272RH | 8B         | 8l    | 2.06e-02 | 2018    | Known | (87, 109)             |
| 30 | BB272RH | 8m         | 8l    | 4.15e-01 | 40660,5 | Known | (34, 44, 47, 87, 109) |
| 30 | BB272RH | 8r         | 8l    | 1.23e-01 | 12083   | Known | (34, 87, 109)         |
| 30 | BB272RH | 45B        | 8l    | 6.82e-02 | 6673    | Known | (34, 109)             |
| 30 | BB272RH | 45A        | 8l    | 1.25e-02 | 1220    | Known | (34, 87, 109)         |
| 30 | BB272RH | 44         | 8l    | 1.93e-02 | 1886    | Known | (34, 87)              |
| 30 | BB272RH | OPRO       | 8l    | 4.41e-03 | 432     | NFP   | NA                    |
| 30 | BB272RH | OPAI       | 8l    | 5.82e-04 | 57      | NFP   | NA                    |
| 30 | BB272RH | 11         | 8l    | 5.41e-04 | 53      | NFP   | NA                    |
| 30 | BB272RH | 14         | 8l    | 6.13e-05 | 6       | NFP   | NA                    |
| 30 | BB272RH | 25         | 8l    | 5.11e-05 | 5       | NFP   | NA                    |
| 30 | BB272RH | 12         | 8l    | 2.12e-02 | 2078    | Known | (34, 87)              |
| 30 | BB272RH | 13         | 8l    | 3.64e-03 | 356     | NFP   | NA                    |
| 30 | BB272RH | PIRI       | 8l    | 9.19e-05 | 9       | NFP   | NA                    |
| 31 | M116RH  | V3         | 9/46v | 1.17e-05 | 4       | Known | (87)                  |
| 31 | M116RH  | 7op        | 9/46v | 4.27e-04 | 146     | Known | (35)                  |

|    |        |            |       |          |      |       |                      |
|----|--------|------------|-------|----------|------|-------|----------------------|
| 31 | M116RH | 7A         | 9/46v | 2.23e-02 | 7614 | Known | (36, 87, 109-110)    |
| 31 | M116RH | 7B         | 9/46v | 1.95e-02 | 6664 | Known | (36-37, 87, 110-112) |
| 31 | M116RH | LIP        | 9/46v | 1.61e-02 | 5516 | Known | (24, 109-111)        |
| 31 | M116RH | VIP        | 9/46v | 3.51e-05 | 12   | NFP   | NA                   |
| 31 | M116RH | AIP        | 9/46v | 2.07e-03 | 706  | Known | (87, 110)            |
| 31 | M116RH | V6A        | 9/46v | 8.19e-05 | 28   | Known | (110)                |
| 31 | M116RH | 5          | 9/46v | 7.02e-05 | 24   | NFP   | NA                   |
| 31 | M116RH | 7m         | 9/46v | 7.78e-04 | 266  | Known | (110)                |
| 31 | M116RH | STPr       | 9/46v | 2.90e-04 | 99   | Known | (87, 109)            |
| 31 | M116RH | STPi       | 9/46v | 7.37e-04 | 252  | Known | (87, 109)            |
| 31 | M116RH | STPc       | 9/46v | 9.83e-04 | 336  | Known | (87, 109)            |
| 31 | M116RH | TPt        | 9/46v | 2.19e-03 | 748  | NFP   | NA                   |
| 31 | M116RH | PGa        | 9/46v | 5.33e-03 | 1823 | Known | (109)                |
| 31 | M116RH | IPa        | 9/46v | 8.97e-03 | 3066 | Known | (87, 109-110)        |
| 31 | M116RH | FST        | 9/46v | 2.34e-05 | 8    | Known | (110)                |
| 31 | M116RH | MST        | 9/46v | 5.73e-04 | 196  | NFP   | NA                   |
| 31 | M116RH | TEOm       | 9/46v | 2.34e-05 | 8    | NFP   | NA                   |
| 31 | M116RH | PERI       | 9/46v | 2.19e-03 | 748  | Known | (66, 109)            |
| 31 | M116RH | TEad       | 9/46v | 2.34e-04 | 80   | NFP   | NA                   |
| 31 | M116RH | TEav       | 9/46v | 4.33e-04 | 148  | Known | (109)                |
| 31 | M116RH | TEpd       | 9/46v | 1.05e-04 | 36   | NFP   | NA                   |
| 31 | M116RH | TEpv       | 9/46v | 7.02e-04 | 240  | Known | (109)                |
| 31 | M116RH | TEa/ma     | 9/46v | 1.14e-02 | 3884 | Known | (38, 87, 109)        |
| 31 | M116RH | TEa/mp     | 9/46v | 2.03e-02 | 6954 | Known | (109)                |
| 31 | M116RH | ENTO       | 9/46v | 2.34e-05 | 8    | NFP   | NA                   |
| 31 | M116RH | TH/TF      | 9/46v | 6.14e-05 | 21   | Known | (57)                 |
| 31 | M116RH | POLE       | 9/46v | 7.26e-04 | 248  | Known | (54, 66)             |
| 31 | M116RH | MB         | 9/46v | 3.51e-05 | 12   | NFP   | NA                   |
| 31 | M116RH | PBr        | 9/46v | 1.17e-05 | 4    | NFP   | NA                   |
| 31 | M116RH | PBc        | 9/46v | 2.05e-05 | 7    | NFP   | NA                   |
| 31 | M116RH | Parainsula | 9/46v | 2.34e-05 | 8    | NFP   | NA                   |
| 31 | M116RH | INSULA     | 9/46v | 1.01e-02 | 3445 | Known | (87, 110-112)        |
| 31 | M116RH | Gu         | 9/46v | 1.52e-04 | 52   | NFP   | NA                   |
| 31 | M116RH | SII        | 9/46v | 2.26e-02 | 7711 | Known | (109-112)            |
| 31 | M116RH | 2          | 9/46v | 1.81e-03 | 618  | Known | (110-111)            |
| 31 | M116RH | 3          | 9/46v | 3.51e-05 | 12   | NFP   | NA                   |
| 31 | M116RH | 23         | 9/46v | 1.18e-02 | 4041 | Known | (109-110)            |
| 31 | M116RH | 24a        | 9/46v | 1.63e-02 | 5584 | Known | (87, 109-111)        |
| 31 | M116RH | 24b        | 9/46v | 2.77e-03 | 948  | Known | (87, 109-110)        |
| 31 | M116RH | 24c        | 9/46v | 6.88e-03 | 2352 | Known | (87, 110-111)        |
| 31 | M116RH | 24d        | 9/46v | 1.14e-03 | 388  | NFP   | NA                   |
| 31 | M116RH | 29/30      | 9/46v | 6.85e-03 | 2342 | NFP   | NA                   |
| 31 | M116RH | 31         | 9/46v | 3.51e-05 | 12   | NFP   | NA                   |
| 31 | M116RH | 32         | 9/46v | 9.07e-05 | 31   | NFP   | NA                   |
| 31 | M116RH | F1         | 9/46v | 5.85e-05 | 20   | NFP   | NA                   |



|    |        |       |       |          |        |       |                   |
|----|--------|-------|-------|----------|--------|-------|-------------------|
| 31 | M116RH | F2    | 9/46v | 5.17e-03 | 1768   | Known | (87, 110)         |
| 31 | M116RH | F7    | 9/46v | 8.75e-03 | 2992   | Known | (109-110)         |
| 31 | M116RH | F3    | 9/46v | 1.24e-03 | 423    | Known | (87, 111)         |
| 31 | M116RH | F6    | 9/46v | 9.18e-03 | 3136   | Known | (87, 110)         |
| 31 | M116RH | F4    | 9/46v | 1.47e-02 | 5016   | Known | (87)              |
| 31 | M116RH | F5    | 9/46v | 1.80e-02 | 6168   | Known | (55, 87, 109-111) |
| 31 | M116RH | ProM  | 9/46v | 9.21e-03 | 3148   | Known | (35, 87, 110-112) |
| 31 | M116RH | 10    | 9/46v | 2.40e-04 | 82     | NFP   | NA                |
| 31 | M116RH | 9     | 9/46v | 5.47e-04 | 187    | NFP   | NA                |
| 31 | M116RH | 46d   | 9/46v | 3.85e-02 | 13150  | Known | (87, 109-110)     |
| 31 | M116RH | 46v   | 9/46v | 3.01e-01 | 102710 | Known | (87, 109-111)     |
| 31 | M116RH | 9/46d | 9/46v | 1.46e-02 | 4994   | Known | (47, 87, 110-111) |
| 31 | M116RH | 8B    | 9/46v | 1.65e-02 | 5628   | Known | (109)             |
| 31 | M116RH | 8l    | 9/46v | 3.08e-03 | 1052   | Known | (44, 47, 109-110) |
| 31 | M116RH | 8m    | 9/46v | 3.47e-02 | 11844  | Known | (44, 47, 109-110) |
| 31 | M116RH | 8r    | 9/46v | 1.93e-03 | 660    | Known | (87, 109-110)     |
| 31 | M116RH | 45B   | 9/46v | 7.63e-03 | 2608   | Known | (109-111)         |
| 31 | M116RH | 45A   | 9/46v | 5.70e-02 | 19496  | Known | (109-111)         |
| 31 | M116RH | 44    | 9/46v | 8.16e-02 | 27884  | Known | (87, 109-112)     |
| 31 | M116RH | OPRO  | 9/46v | 6.66e-03 | 2276   | Known | (110, 112)        |
| 31 | M116RH | OPAI  | 9/46v | 2.93e-04 | 100    | Known | (110)             |
| 31 | M116RH | 11    | 9/46v | 6.02e-02 | 20564  | Known | (48, 110-111)     |
| 31 | M116RH | 14    | 9/46v | 4.68e-04 | 160    | Known | (48)              |
| 31 | M116RH | 12    | 9/46v | 9.71e-02 | 33186  | Known | (44, 87, 109-111) |
| 31 | M116RH | 13    | 9/46v | 1.48e-02 | 5064   | Known | (110-111)         |
| 32 | M116RH | V2    | 46d   | 2.24e-03 | 540    | NFP   | NA                |
| 32 | M116RH | V3    | 46d   | 1.16e-04 | 28     | NFP   | NA                |
| 32 | M116RH | 7op   | 46d   | 1.66e-05 | 4      | NFP   | NA                |
| 32 | M116RH | 7A    | 46d   | 5.15e-04 | 124    | Known | (36-37, 113)      |
| 32 | M116RH | LIP   | 46d   | 3.32e-05 | 8      | Known | (113)             |
| 32 | M116RH | VIP   | 46d   | 1.66e-05 | 4      | NFP   | NA                |
| 32 | M116RH | MIP   | 46d   | 1.66e-05 | 4      | NFP   | NA                |
| 32 | M116RH | DP    | 46d   | 2.57e-04 | 62     | NFP   | NA                |
| 32 | M116RH | V6A   | 46d   | 7.47e-05 | 18     | NFP   | NA                |
| 32 | M116RH | 7m    | 46d   | 7.47e-04 | 180    | Known | (113)             |
| 32 | M116RH | STPr  | 46d   | 6.14e-04 | 148    | Known | (38)              |
| 32 | M116RH | STPi  | 46d   | 1.32e-02 | 3179   | Known | (39)              |
| 32 | M116RH | STPc  | 46d   | 4.44e-03 | 1070   | Known | (39, 113)         |
| 32 | M116RH | PGa   | 46d   | 2.97e-03 | 716    | NFP   | NA                |
| 32 | M116RH | MST   | 46d   | 1.66e-05 | 4      | NFP   | NA                |
| 32 | M116RH | MT    | 46d   | 1.66e-05 | 4      | NFP   | NA                |
| 32 | M116RH | TEO   | 46d   | 1.66e-05 | 4      | NFP   | NA                |
| 32 | M116RH | TEOm  | 46d   | 1.66e-05 | 4      | NFP   | NA                |
| 32 | M116RH | PERI  | 46d   | 3.32e-05 | 8      | NFP   | NA                |
| 32 | M116RH | TEpd  | 46d   | 6.64e-05 | 16     | NFP   | NA                |



|    |        |            |     |          |        |       |               |
|----|--------|------------|-----|----------|--------|-------|---------------|
| 32 | M116RH | TEpv       | 46d | 3.74e-05 | 9      | NFP   | NA            |
| 32 | M116RH | ENTO       | 46d | 1.66e-05 | 4      | NFP   | NA            |
| 32 | M116RH | TH/TF      | 46d | 8.30e-05 | 20     | Known | (25, 57)      |
| 32 | M116RH | POLE       | 46d | 1.66e-05 | 4      | NFP   | NA            |
| 32 | M116RH | PBr        | 46d | 4.65e-04 | 112    | NFP   | NA            |
| 32 | M116RH | PBc        | 46d | 1.83e-04 | 44     | Known | (36)          |
| 32 | M116RH | Parainsula | 46d | 3.32e-05 | 8      | NFP   | NA            |
| 32 | M116RH | INSULA     | 46d | 1.66e-05 | 4      | NFP   | NA            |
| 32 | M116RH | 2          | 46d | 1.66e-05 | 4      | NFP   | NA            |
| 32 | M116RH | 3          | 46d | 2.91e-05 | 7      | NFP   | NA            |
| 32 | M116RH | 23         | 46d | 1.38e-02 | 3321   | Known | (42, 45, 113) |
| 32 | M116RH | 24a        | 46d | 1.83e-04 | 44     | NFP   | NA            |
| 32 | M116RH | 24b        | 46d | 3.32e-05 | 8      | NFP   | NA            |
| 32 | M116RH | 24c        | 46d | 3.04e-03 | 732    | NFP   | NA            |
| 32 | M116RH | 24d        | 46d | 1.66e-05 | 4      | NFP   | NA            |
| 32 | M116RH | 29/30      | 46d | 2.47e-03 | 595    | Known | (42-43)       |
| 32 | M116RH | 31         | 46d | 1.01e-03 | 244    | Known | (113)         |
| 32 | M116RH | 32         | 46d | 1.59e-03 | 384    | Known | (44)          |
| 32 | M116RH | F1         | 46d | 6.64e-05 | 16     | NFP   | NA            |
| 32 | M116RH | F2         | 46d | 1.33e-04 | 32     | NFP   | NA            |
| 32 | M116RH | F7         | 46d | 7.37e-03 | 1776   | Known | (113)         |
| 32 | M116RH | F3         | 46d | 1.66e-05 | 4      | NFP   | NA            |
| 32 | M116RH | F6         | 46d | 3.32e-03 | 800    | NFP   | NA            |
| 32 | M116RH | F4         | 46d | 3.32e-05 | 8      | NFP   | NA            |
| 32 | M116RH | F5         | 46d | 4.98e-05 | 12     | NFP   | NA            |
| 32 | M116RH | 10         | 46d | 7.51e-02 | 18094  | Known | (44, 113)     |
| 32 | M116RH | 9          | 46d | 1.17e-01 | 28219  | Known | (113)         |
| 32 | M116RH | 46v        | 46d | 5.84e-02 | 14071  | Known | (113)         |
| 32 | M116RH | 9/46d      | 46d | 6.04e-01 | 145390 | Known | (47, 113)     |
| 32 | M116RH | 9/46v      | 46d | 1.16e-04 | 28     | Known | (44, 47)      |
| 32 | M116RH | 8B         | 46d | 3.92e-02 | 9436   | Known | (113)         |
| 32 | M116RH | 8l         | 46d | 6.64e-05 | 16     | Known | (113)         |
| 32 | M116RH | 8m         | 46d | 3.16e-02 | 7612   | Known | (44, 47, 113) |
| 32 | M116RH | 8r         | 46d | 4.24e-03 | 1020   | Known | (113)         |
| 32 | M116RH | 45A        | 46d | 1.44e-03 | 348    | Known | (113)         |
| 32 | M116RH | 44         | 46d | 8.30e-05 | 20     | NFP   | NA            |
| 32 | M116RH | OPRO       | 46d | 4.82e-04 | 116    | NFP   | NA            |
| 32 | M116RH | 11         | 46d | 2.63e-03 | 634    | NFP   | NA            |
| 32 | M116RH | 14         | 46d | 2.23e-03 | 536    | Known | (48)          |
| 32 | M116RH | 12         | 46d | 3.54e-03 | 853    | Known | (44)          |
| 32 | M116RH | 13         | 46d | 5.65e-04 | 136    | Known | (48)          |
| 33 | M128LH | V4         | 8B  | 7.73e-06 | 2      | NFP   | NA            |
| 33 | M128LH | 7A         | 8B  | 8.88e-04 | 230    | Known | (34, 37)      |
| 33 | M128LH | LIP        | 8B  | 5.72e-04 | 148    | Known | (34)          |
| 33 | M128LH | DP         | 8B  | 1.04e-04 | 27     | NFP   | NA            |

|    |        |            |    |          |       |       |              |
|----|--------|------------|----|----------|-------|-------|--------------|
| 33 | M128LH | 7m         | 8B | 2.65e-03 | 686   | Known | (34)         |
| 33 | M128LH | STPr       | 8B | 1.91e-02 | 4952  | Known | (34, 38)     |
| 33 | M128LH | STPi       | 8B | 1.44e-02 | 3720  | Known | (34, 39)     |
| 33 | M128LH | STPc       | 8B | 5.41e-05 | 14    | NFP   | NA           |
| 33 | M128LH | PGa        | 8B | 3.97e-03 | 1027  | NFP   | NA           |
| 33 | M128LH | IPa        | 8B | 7.11e-04 | 184   | NFP   | NA           |
| 33 | M128LH | FST        | 8B | 2.20e-04 | 57    | NFP   | NA           |
| 33 | M128LH | PERI       | 8B | 3.48e-05 | 9     | NFP   | NA           |
| 33 | M128LH | TEad       | 8B | 1.55e-05 | 4     | NFP   | NA           |
| 33 | M128LH | TEa/ma     | 8B | 9.27e-05 | 24    | NFP   | NA           |
| 33 | M128LH | TEa/mp     | 8B | 3.09e-05 | 8     | NFP   | NA           |
| 33 | M128LH | ENTO       | 8B | 1.55e-04 | 40    | NFP   | NA           |
| 33 | M128LH | TH/TF      | 8B | 2.97e-04 | 77    | Known | (34, 57)     |
| 33 | M128LH | POLE       | 8B | 8.99e-03 | 2328  | NFP   | NA           |
| 33 | M128LH | CORE       | 8B | 1.55e-05 | 4     | NFP   | NA           |
| 33 | M128LH | MB         | 8B | 3.86e-05 | 10    | NFP   | NA           |
| 33 | M128LH | LB         | 8B | 2.70e-05 | 7     | Known | (41)         |
| 33 | M128LH | PBr        | 8B | 3.52e-04 | 91    | NFP   | NA           |
| 33 | M128LH | Parainsula | 8B | 6.18e-05 | 16    | NFP   | NA           |
| 33 | M128LH | INSULA     | 8B | 1.00e-04 | 26    | NFP   | NA           |
| 33 | M128LH | SII        | 8B | 7.73e-06 | 2     | NFP   | NA           |
| 33 | M128LH | 23         | 8B | 6.53e-03 | 1691  | Known | (34, 42, 45) |
| 33 | M128LH | 24a        | 8B | 2.54e-03 | 657   | Known | (34)         |
| 33 | M128LH | 24b        | 8B | 8.14e-03 | 2107  | NFP   | NA           |
| 33 | M128LH | 24c        | 8B | 9.37e-02 | 24248 | NFP   | NA           |
| 33 | M128LH | 24d        | 8B | 1.39e-04 | 36    | NFP   | NA           |
| 33 | M128LH | 29/30      | 8B | 5.37e-04 | 139   | Known | (34, 42)     |
| 33 | M128LH | 31         | 8B | 7.07e-04 | 183   | Known | (34)         |
| 33 | M128LH | 32         | 8B | 3.40e-02 | 8796  | Known | (34, 45)     |
| 33 | M128LH | F1         | 8B | 7.73e-06 | 2     | NFP   | NA           |
| 33 | M128LH | F2         | 8B | 8.50e-05 | 22    | Known | (34, 55)     |
| 33 | M128LH | F7         | 8B | 1.51e-01 | 39132 | Known | (34)         |
| 33 | M128LH | F6         | 8B | 6.55e-02 | 16946 | Known | (34)         |
| 33 | M128LH | F4         | 8B | 3.09e-05 | 8     | NFP   | NA           |
| 33 | M128LH | F5         | 8B | 7.73e-06 | 2     | NFP   | NA           |
| 33 | M128LH | 10         | 8B | 1.32e-01 | 34149 | Known | (34)         |
| 33 | M128LH | 9          | 8B | 1.76e-01 | 45672 | Known | (34)         |
| 33 | M128LH | 46d        | 8B | 3.99e-02 | 10340 | Known | (34)         |
| 33 | M128LH | 46v        | 8B | 3.92e-02 | 10136 | Known | (34)         |
| 33 | M128LH | 9/46d      | 8B | 8.70e-02 | 22512 | Known | (34, 47)     |
| 33 | M128LH | 9/46v      | 8B | 1.47e-04 | 38    | NFP   | NA           |
| 33 | M128LH | 8l         | 8B | 9.35e-04 | 242   | Known | (44, 47)     |
| 33 | M128LH | 8m         | 8B | 4.91e-02 | 12704 | Known | (34, 44, 47) |
| 33 | M128LH | 8r         | 8B | 5.83e-04 | 151   | Known | (34)         |
| 33 | M128LH | 45B        | 8B | 4.79e-04 | 124   | Known | (34)         |

|    |        |            |    |          |      |       |                       |
|----|--------|------------|----|----------|------|-------|-----------------------|
| 33 | M128LH | 45A        | 8B | 2.78e-04 | 72   | Known | (34)                  |
| 33 | M128LH | 44         | 8B | 5.41e-05 | 14   | NFP   | NA                    |
| 33 | M128LH | OPRO       | 8B | 5.41e-03 | 1400 | NFP   | NA                    |
| 33 | M128LH | OPAI       | 8B | 2.63e-04 | 68   | NFP   | NA                    |
| 33 | M128LH | 11         | 8B | 1.27e-02 | 3288 | NFP   | NA                    |
| 33 | M128LH | 14         | 8B | 5.54e-03 | 1435 | Known | (34)                  |
| 33 | M128LH | 25         | 8B | 1.55e-04 | 40   | NFP   | NA                    |
| 33 | M128LH | 12         | 8B | 2.24e-02 | 5808 | Known | (34)                  |
| 33 | M128LH | 13         | 8B | 1.12e-02 | 2908 | Known | (34)                  |
| 33 | M128LH | PIRI       | 8B | 4.02e-04 | 104  | NFP   | NA                    |
| 34 | M131LH | V2         | 10 | 1.02e-05 | 2    | Known | (114-115)             |
| 34 | M131LH | Pro.St.    | 10 | 1.12e-04 | 22   | Known | (114-115)             |
| 34 | M131LH | 7op        | 10 | 4.08e-05 | 8    | NFP   | NA                    |
| 34 | M131LH | 7A         | 10 | 6.53e-04 | 128  | NFP   | NA                    |
| 34 | M131LH | LIP        | 10 | 1.02e-05 | 2    | NFP   | NA                    |
| 34 | M131LH | MIP        | 10 | 1.02e-05 | 2    | NFP   | NA                    |
| 34 | M131LH | PIP        | 10 | 8.17e-05 | 16   | NFP   | NA                    |
| 34 | M131LH | DP         | 10 | 4.39e-04 | 86   | NFP   | NA                    |
| 34 | M131LH | STPr       | 10 | 2.98e-02 | 5828 | Known | (38, 115)             |
| 34 | M131LH | STPi       | 10 | 4.14e-02 | 8100 | Known | (38, 114-115)         |
| 34 | M131LH | STPc       | 10 | 9.03e-03 | 1768 | Known | (38, 115)             |
| 34 | M131LH | PGa        | 10 | 1.99e-03 | 389  | NFP   | NA                    |
| 34 | M131LH | IPa        | 10 | 1.63e-04 | 32   | NFP   | NA                    |
| 34 | M131LH | FST        | 10 | 1.63e-04 | 32   | NFP   | NA                    |
| 34 | M131LH | PERI       | 10 | 1.12e-04 | 22   | Known | (57, 114-115)         |
| 34 | M131LH | TEav       | 10 | 4.08e-05 | 8    | Known | (114)                 |
| 34 | M131LH | TEpd       | 10 | 1.02e-05 | 2    | NFP   | NA                    |
| 34 | M131LH | TEpv       | 10 | 1.02e-05 | 2    | NFP   | NA                    |
| 34 | M131LH | TEa/ma     | 10 | 2.55e-05 | 5    | Known | (114-115)             |
| 34 | M131LH | TEa/mp     | 10 | 5.10e-06 | 1    | NFP   | NA                    |
| 34 | M131LH | ENTO       | 10 | 4.59e-04 | 90   | Known | (114-115)             |
| 34 | M131LH | TH/TF      | 10 | 9.55e-04 | 187  | Known | (25, 38, 57, 114-115) |
| 34 | M131LH | SUB        | 10 | 3.06e-05 | 6    | NFP   | NA                    |
| 34 | M131LH | POLE       | 10 | 3.62e-02 | 7094 | Known | (38, 54, 114-116)     |
| 34 | M131LH | CORE       | 10 | 3.47e-04 | 68   | Known | (115)                 |
| 34 | M131LH | MB         | 10 | 1.61e-03 | 315  | Known | (115)                 |
| 34 | M131LH | LB         | 10 | 1.17e-03 | 229  | Known | (41, 115-116)         |
| 34 | M131LH | PBr        | 10 | 2.93e-02 | 5736 | Known | (38, 115-116)         |
| 34 | M131LH | PBc        | 10 | 9.41e-03 | 1844 | Known | (36, 38, 115-116)     |
| 34 | M131LH | Parainsula | 10 | 9.04e-04 | 177  | Known | (115)                 |
| 34 | M131LH | INSULA     | 10 | 4.19e-04 | 82   | Known | (114-115)             |
| 34 | M131LH | 23         | 10 | 5.51e-03 | 1080 | Known | (42, 114-115)         |
| 34 | M131LH | 24a        | 10 | 1.63e-04 | 32   | Known | (114-115)             |
| 34 | M131LH | 24b        | 10 | 8.58e-04 | 168  | Known | (48, 114-115)         |
| 34 | M131LH | 24c        | 10 | 1.62e-03 | 317  | Known | (48, 114-115)         |

|    |        |         |    |          |        |       |                        |
|----|--------|---------|----|----------|--------|-------|------------------------|
| 34 | M131LH | 24d     | 10 | 4.90e-04 | 96     | NFP   | NA                     |
| 34 | M131LH | 29/30   | 10 | 1.20e-03 | 236    | Known | (42, 114-115)          |
| 34 | M131LH | 31      | 10 | 5.51e-04 | 108    | Known | (64, 114)              |
| 34 | M131LH | 32      | 10 | 1.35e-02 | 2638   | Known | (46, 48, 114-115, 117) |
| 34 | M131LH | F2      | 10 | 1.28e-04 | 25     | NFP   | NA                     |
| 34 | M131LH | F7      | 10 | 1.20e-03 | 236    | NFP   | NA                     |
| 34 | M131LH | F6      | 10 | 1.02e-05 | 2      | NFP   | NA                     |
| 34 | M131LH | F4      | 10 | 1.53e-05 | 3      | NFP   | NA                     |
| 34 | M131LH | 9       | 10 | 1.10e-01 | 21478  | Known | (46, 48, 114-115)      |
| 34 | M131LH | 46d     | 10 | 2.21e-01 | 43373  | Known | (48, 114-115)          |
| 34 | M131LH | 46v     | 10 | 1.55e-01 | 30350  | Known | (48, 114-115)          |
| 34 | M131LH | 9/46d   | 10 | 1.28e-04 | 25     | Known | (48, 114-115)          |
| 34 | M131LH | 8B      | 10 | 8.50e-03 | 1665   | Known | (114-115)              |
| 34 | M131LH | 8l      | 10 | 1.57e-03 | 308    | Known | (114-115)              |
| 34 | M131LH | 8m      | 10 | 1.51e-02 | 2960   | Known | (47, 114-115)          |
| 34 | M131LH | 8r      | 10 | 8.17e-05 | 16     | NFP   | NA                     |
| 34 | M131LH | 45B     | 10 | 1.17e-03 | 230    | Known | (115)                  |
| 34 | M131LH | 45A     | 10 | 3.52e-03 | 690    | Known | (48, 115)              |
| 34 | M131LH | 44      | 10 | 1.02e-05 | 2      | Known | (115)                  |
| 34 | M131LH | OPRO    | 10 | 1.47e-02 | 2880   | Known | (46, 48, 114)          |
| 34 | M131LH | OPAI    | 10 | 8.17e-05 | 16     | Known | (46, 48)               |
| 34 | M131LH | 11      | 10 | 1.36e-02 | 2671   | Known | (46, 48, 114-115)      |
| 34 | M131LH | 14      | 10 | 1.45e-01 | 28468  | Known | (46, 48, 114-115)      |
| 34 | M131LH | 25      | 10 | 2.38e-02 | 4660   | Known | (46, 48, 114-115)      |
| 34 | M131LH | 12      | 10 | 6.63e-02 | 12983  | Known | (44, 46, 48, 114-115)  |
| 34 | M131LH | 13      | 10 | 3.01e-02 | 5888   | Known | (46, 48, 114-115)      |
| 35 | M133LH | V1      | MT | 1.90e-02 | 12757  | Known | (3, 13-14, 74)         |
| 35 | M133LH | V2      | MT | 1.19e-01 | 80233  | Known | (3-4, 13-14, 74, 118)  |
| 35 | M133LH | V3      | MT | 5.10e-02 | 34282  | Known | (9, 13, 74)            |
| 35 | M133LH | V3A     | MT | 3.35e-02 | 22510  | Known | (3, 74)                |
| 35 | M133LH | V4      | MT | 3.81e-01 | 255836 | Known | (3, 11, 13, 74)        |
| 35 | M133LH | V4t     | MT | 7.71e-02 | 51790  | Known | (3, 74)                |
| 35 | M133LH | Pro.St. | MT | 8.93e-06 | 6      | NFP   | NA                     |
| 35 | M133LH | 7A      | MT | 4.53e-04 | 304    | Known | (17, 76)               |
| 35 | M133LH | LIP     | MT | 2.29e-02 | 15358  | Known | (3, 17, 24, 74)        |
| 35 | M133LH | VIP     | MT | 1.49e-03 | 1004   | Known | (3, 13, 17, 74)        |
| 35 | M133LH | MIP     | MT | 1.19e-05 | 8      | Known | (74)                   |
| 35 | M133LH | PIP     | MT | 9.32e-03 | 6261   | Known | (3, 74)                |
| 35 | M133LH | DP      | MT | 1.46e-02 | 9836   | Known | (74)                   |
| 35 | M133LH | V6A     | MT | 2.98e-06 | 2      | Known | (3)                    |
| 35 | M133LH | STPr    | MT | 2.43e-04 | 163    | NFP   | NA                     |
| 35 | M133LH | STPi    | MT | 2.17e-04 | 146    | NFP   | NA                     |
| 35 | M133LH | STPc    | MT | 1.78e-03 | 1196   | Known | (74)                   |
| 35 | M133LH | TPt     | MT | 2.68e-05 | 18     | NFP   | NA                     |
| 35 | M133LH | PGa     | MT | 6.07e-03 | 4074   | NFP   | NA                     |

|    |        |        |    |          |       |       |                 |
|----|--------|--------|----|----------|-------|-------|-----------------|
| 35 | M133LH | IPa    | MT | 1.33e-03 | 895   | Known | (74)            |
| 35 | M133LH | FST    | MT | 6.19e-02 | 41544 | Known | (3, 20, 74)     |
| 35 | M133LH | MST    | MT | 5.74e-03 | 3857  | Known | (3, 13, 20, 74) |
| 35 | M133LH | TEO    | MT | 3.82e-02 | 25656 | Known | (21)            |
| 35 | M133LH | TEOm   | MT | 8.84e-02 | 59404 | Known | (19)            |
| 35 | M133LH | PERI   | MT | 8.87e-04 | 596   | NFP   | NA              |
| 35 | M133LH | TEad   | MT | 1.06e-03 | 712   | NFP   | NA              |
| 35 | M133LH | TEav   | MT | 1.16e-03 | 778   | NFP   | NA              |
| 35 | M133LH | TEpd   | MT | 1.36e-02 | 9102  | NFP   | NA              |
| 35 | M133LH | TEpv   | MT | 1.89e-02 | 12698 | NFP   | NA              |
| 35 | M133LH | TEa/ma | MT | 2.27e-03 | 1522  | NFP   | NA              |
| 35 | M133LH | TEa/mp | MT | 1.51e-02 | 10112 | Known | (79)            |
| 35 | M133LH | TH/TF  | MT | 9.41e-03 | 6322  | NFP   | NA              |
| 35 | M133LH | SUB    | MT | 2.98e-06 | 2     | NFP   | NA              |
| 35 | M133LH | POLE   | MT | 2.38e-05 | 16    | NFP   | NA              |
| 35 | M133LH | MB     | MT | 8.04e-05 | 54    | NFP   | NA              |
| 35 | M133LH | LB     | MT | 2.98e-06 | 2     | NFP   | NA              |
| 35 | M133LH | PBr    | MT | 1.79e-05 | 12    | NFP   | NA              |
| 35 | M133LH | INSULA | MT | 4.47e-05 | 30    | NFP   | NA              |
| 35 | M133LH | SII    | MT | 2.98e-06 | 2     | NFP   | NA              |
| 35 | M133LH | 1      | MT | 2.98e-06 | 2     | NFP   | NA              |
| 35 | M133LH | 2      | MT | 2.38e-05 | 16    | NFP   | NA              |
| 35 | M133LH | 23     | MT | 1.13e-04 | 76    | NFP   | NA              |
| 35 | M133LH | 24a    | MT | 1.04e-05 | 7     | NFP   | NA              |
| 35 | M133LH | 24b    | MT | 4.47e-06 | 3     | NFP   | NA              |
| 35 | M133LH | 29/30  | MT | 1.79e-05 | 12    | NFP   | NA              |
| 35 | M133LH | 32     | MT | 2.98e-06 | 2     | NFP   | NA              |
| 35 | M133LH | F1     | MT | 2.98e-06 | 2     | NFP   | NA              |
| 35 | M133LH | F2     | MT | 5.96e-06 | 4     | NFP   | NA              |
| 35 | M133LH | F4     | MT | 2.08e-05 | 14    | NFP   | NA              |
| 35 | M133LH | F5     | MT | 2.98e-06 | 2     | NFP   | NA              |
| 35 | M133LH | ProM   | MT | 2.98e-06 | 2     | NFP   | NA              |
| 35 | M133LH | 9/46d  | MT | 5.96e-06 | 4     | NFP   | NA              |
| 35 | M133LH | 9/46v  | MT | 3.87e-05 | 26    | NFP   | NA              |
| 35 | M133LH | 8l     | MT | 2.28e-03 | 1528  | Known | (22, 47)        |
| 35 | M133LH | 8m     | MT | 6.28e-04 | 422   | Known | (47)            |
| 35 | M133LH | 8r     | MT | 8.04e-05 | 54    | NFP   | NA              |
| 35 | M133LH | 45B    | MT | 5.00e-04 | 336   | NFP   | NA              |
| 35 | M133LH | 45A    | MT | 2.98e-06 | 2     | NFP   | NA              |
| 35 | M133LH | OPRO   | MT | 2.98e-06 | 2     | NFP   | NA              |
| 36 | M136LH | V1     | 7m | 2.68e-05 | 9     | NFP   | NA              |
| 36 | M136LH | V2     | 7m | 1.45e-03 | 487   | Known | (64)            |
| 36 | M136LH | V3     | 7m | 1.79e-05 | 6     | Known | (18)            |
| 36 | M136LH | V3A    | 7m | 1.73e-04 | 58    | NFP   | NA              |
| 36 | M136LH | V4     | 7m | 3.66e-04 | 123   | NFP   | NA              |

|    |        |         |    |          |        |       |                     |
|----|--------|---------|----|----------|--------|-------|---------------------|
| 36 | M136LH | Pro.St. | 7m | 1.61e-04 | 54     | NFP   | NA                  |
| 36 | M136LH | 7op     | 7m | 5.42e-04 | 182    | Known | (35, 64, 119)       |
| 36 | M136LH | 7A      | 7m | 7.85e-02 | 26357  | Known | (18, 62, 64, 119)   |
| 36 | M136LH | 7B      | 7m | 5.96e-06 | 2      | Known | (119)               |
| 36 | M136LH | LIP     | 7m | 3.11e-02 | 10434  | Known | (18, 119)           |
| 36 | M136LH | VIP     | 7m | 8.38e-03 | 2815   | Known | (18, 64, 119)       |
| 36 | M136LH | MIP     | 7m | 2.74e-02 | 9189   | Known | (119)               |
| 36 | M136LH | PIP     | 7m | 4.77e-03 | 1601   | Known | (18)                |
| 36 | M136LH | AIP     | 7m | 3.13e-04 | 105    | NFP   | NA                  |
| 36 | M136LH | DP      | 7m | 1.34e-02 | 4510   | Known | (18)                |
| 36 | M136LH | V6      | 7m | 2.32e-03 | 780    | Known | (18, 64)            |
| 36 | M136LH | V6A     | 7m | 4.34e-01 | 145681 | Known | (18, 64, 119)       |
| 36 | M136LH | 5       | 7m | 7.11e-03 | 2388   | Known | (18, 62, 64, 119)   |
| 36 | M136LH | STPr    | 7m | 5.96e-05 | 20     | Known | (65)                |
| 36 | M136LH | STPi    | 7m | 8.93e-05 | 30     | Known | (18, 65, 119)       |
| 36 | M136LH | STPc    | 7m | 1.17e-02 | 3921   | Known | (18-19, 64-65, 119) |
| 36 | M136LH | TPt     | 7m | 3.70e-03 | 1242   | Known | (119)               |
| 36 | M136LH | PGa     | 7m | 6.25e-04 | 210    | NFP   | NA                  |
| 36 | M136LH | IPa     | 7m | 1.37e-04 | 46     | NFP   | NA                  |
| 36 | M136LH | FST     | 7m | 5.36e-05 | 18     | NFP   | NA                  |
| 36 | M136LH | MST     | 7m | 7.99e-02 | 26839  | Known | (18, 64, 119)       |
| 36 | M136LH | MT      | 7m | 9.14e-04 | 307    | Known | (18, 119)           |
| 36 | M136LH | PERI    | 7m | 1.79e-04 | 60     | Known | (119)               |
| 36 | M136LH | TEpd    | 7m | 5.96e-06 | 2      | NFP   | NA                  |
| 36 | M136LH | TEpv    | 7m | 5.81e-04 | 195    | NFP   | NA                  |
| 36 | M136LH | TEa/mp  | 7m | 1.79e-05 | 6      | NFP   | NA                  |
| 36 | M136LH | ENTO    | 7m | 4.17e-05 | 14     | Known | (119)               |
| 36 | M136LH | TH/TF   | 7m | 5.84e-04 | 196    | Known | (18)                |
| 36 | M136LH | MB      | 7m | 3.10e-04 | 104    | Known | (119)               |
| 36 | M136LH | LB      | 7m | 3.33e-04 | 112    | NFP   | NA                  |
| 36 | M136LH | PBr     | 7m | 5.96e-06 | 2      | NFP   | NA                  |
| 36 | M136LH | PBc     | 7m | 9.71e-04 | 326    | NFP   | NA                  |
| 36 | M136LH | INSULA  | 7m | 1.55e-04 | 52     | Known | (18, 119)           |
| 36 | M136LH | 1       | 7m | 1.55e-04 | 52     | Known | (119)               |
| 36 | M136LH | 2       | 7m | 1.19e-05 | 4      | Known | (64, 119)           |
| 36 | M136LH | 3       | 7m | 2.98e-05 | 10     | Known | (119)               |
| 36 | M136LH | 23      | 7m | 9.12e-02 | 30620  | Known | (18, 64, 119)       |
| 36 | M136LH | 24a     | 7m | 1.10e-03 | 368    | Known | (119)               |
| 36 | M136LH | 24b     | 7m | 1.01e-02 | 3407   | Known | (119)               |
| 36 | M136LH | 24c     | 7m | 1.65e-03 | 554    | Known | (64, 67, 119)       |
| 36 | M136LH | 24d     | 7m | 9.13e-03 | 3067   | Known | (119)               |
| 36 | M136LH | 29/30   | 7m | 5.65e-03 | 1899   | Known | (18, 43, 119)       |
| 36 | M136LH | 31      | 7m | 2.68e-02 | 8990   | Known | (18, 64, 119)       |
| 36 | M136LH | 32      | 7m | 3.57e-05 | 12     | Known | (67, 119)           |
| 36 | M136LH | F1      | 7m | 3.07e-04 | 103    | Known | (64, 119)           |

|    |        |         |    |          |       |       |                       |
|----|--------|---------|----|----------|-------|-------|-----------------------|
| 36 | M136LH | F2      | 7m | 3.17e-02 | 10644 | Known | (67, 119)             |
| 36 | M136LH | F7      | 7m | 1.34e-02 | 4505  | Known | (67, 119)             |
| 36 | M136LH | F3      | 7m | 1.67e-03 | 562   | Known | (67, 119)             |
| 36 | M136LH | F6      | 7m | 1.90e-03 | 638   | Known | (67)                  |
| 36 | M136LH | F5      | 7m | 2.98e-05 | 10    | Known | (67, 119)             |
| 36 | M136LH | 9       | 7m | 4.82e-04 | 162   | Known | (43, 67)              |
| 36 | M136LH | 46d     | 7m | 4.29e-03 | 1442  | Known | (64, 67, 119)         |
| 36 | M136LH | 46v     | 7m | 5.78e-03 | 1941  | Known | (67)                  |
| 36 | M136LH | 9/46d   | 7m | 2.16e-02 | 7248  | Known | (47, 64, 67, 119)     |
| 36 | M136LH | 9/46v   | 7m | 1.24e-03 | 416   | Known | (67)                  |
| 36 | M136LH | 8B      | 7m | 3.84e-02 | 12896 | Known | (47, 67, 119)         |
| 36 | M136LH | 8l      | 7m | 5.78e-04 | 194   | NFP   | NA                    |
| 36 | M136LH | 8m      | 7m | 1.86e-02 | 6238  | Known | (22, 47, 64, 67, 119) |
| 36 | M136LH | 8r      | 7m | 3.68e-03 | 1236  | Known | (64, 67, 119)         |
| 36 | M136LH | 45B     | 7m | 1.13e-04 | 38    | Known | (119)                 |
| 36 | M136LH | 44      | 7m | 1.67e-04 | 56    | NFP   | NA                    |
| 36 | M136LH | 11      | 7m | 2.98e-05 | 10    | NFP   | NA                    |
| 36 | M136LH | 14      | 7m | 2.08e-05 | 7     | NFP   | NA                    |
| 36 | M136LH | 25      | 7m | 2.38e-05 | 8     | NFP   | NA                    |
| 36 | M136LH | 12      | 7m | 4.17e-05 | 14    | NFP   | NA                    |
| 36 | M136LH | 13      | 7m | 2.38e-05 | 8     | NFP   | NA                    |
| 37 | M136LH | V2      | 10 | 1.87e-05 | 6     | Known | (114-115)             |
| 37 | M136LH | Pro.St. | 10 | 6.32e-03 | 2026  | Known | (114-115)             |
| 37 | M136LH | 7A      | 10 | 3.12e-06 | 1     | NFP   | NA                    |
| 37 | M136LH | DP      | 10 | 3.12e-06 | 1     | NFP   | NA                    |
| 37 | M136LH | STPr    | 10 | 3.79e-02 | 12168 | Known | (38, 115)             |
| 37 | M136LH | STPi    | 10 | 1.01e-02 | 3234  | Known | (38, 114-115)         |
| 37 | M136LH | STPc    | 10 | 7.39e-03 | 2372  | Known | (38, 115)             |
| 37 | M136LH | PGa     | 10 | 2.67e-03 | 858   | NFP   | NA                    |
| 37 | M136LH | IPa     | 10 | 2.81e-04 | 90    | NFP   | NA                    |
| 37 | M136LH | FST     | 10 | 4.99e-05 | 16    | NFP   | NA                    |
| 37 | M136LH | PERI    | 10 | 9.29e-04 | 298   | Known | (57, 114-115)         |
| 37 | M136LH | TEad    | 10 | 2.49e-05 | 8     | NFP   | NA                    |
| 37 | M136LH | TEav    | 10 | 1.12e-04 | 36    | Known | (114)                 |
| 37 | M136LH | TEpd    | 10 | 1.25e-05 | 4     | NFP   | NA                    |
| 37 | M136LH | TEpv    | 10 | 6.23e-06 | 2     | NFP   | NA                    |
| 37 | M136LH | TEa/ma  | 10 | 3.05e-04 | 98    | Known | (114-115)             |
| 37 | M136LH | ENTO    | 10 | 2.52e-04 | 81    | Known | (114-115)             |
| 37 | M136LH | TH/TF   | 10 | 1.37e-03 | 441   | Known | (25, 38, 57, 114-115) |
| 37 | M136LH | SUB     | 10 | 5.92e-05 | 19    | NFP   | NA                    |
| 37 | M136LH | POLE    | 10 | 1.72e-02 | 5526  | Known | (38, 54, 114-116)     |
| 37 | M136LH | CORE    | 10 | 7.98e-04 | 256   | Known | (115)                 |
| 37 | M136LH | MB      | 10 | 6.42e-04 | 206   | Known | (115)                 |
| 37 | M136LH | LB      | 10 | 2.07e-03 | 665   | Known | (41, 115-116)         |
| 37 | M136LH | PBr     | 10 | 1.97e-02 | 6334  | Known | (38, 115-116)         |

|    |        |            |    |          |       |       |                        |
|----|--------|------------|----|----------|-------|-------|------------------------|
| 37 | M136LH | PBc        | 10 | 5.33e-04 | 171   | Known | (36, 38, 115-116)      |
| 37 | M136LH | Parainsula | 10 | 1.68e-04 | 54    | Known | (115)                  |
| 37 | M136LH | INSULA     | 10 | 1.93e-04 | 62    | Known | (114-115)              |
| 37 | M136LH | 23         | 10 | 1.92e-02 | 6158  | Known | (42, 114-115)          |
| 37 | M136LH | 24a        | 10 | 1.54e-03 | 494   | Known | (114-115)              |
| 37 | M136LH | 24b        | 10 | 4.68e-04 | 150   | Known | (48, 114-115)          |
| 37 | M136LH | 24c        | 10 | 2.09e-03 | 670   | Known | (48, 114-115)          |
| 37 | M136LH | 24d        | 10 | 2.49e-05 | 8     | NFP   | NA                     |
| 37 | M136LH | 29/30      | 10 | 1.10e-03 | 353   | Known | (42, 114-115)          |
| 37 | M136LH | 31         | 10 | 2.43e-03 | 778   | Known | (64, 114)              |
| 37 | M136LH | 32         | 10 | 5.22e-02 | 16745 | Known | (46, 48, 114-115, 117) |
| 37 | M136LH | F1         | 10 | 6.23e-06 | 2     | NFP   | NA                     |
| 37 | M136LH | F2         | 10 | 5.61e-05 | 18    | NFP   | NA                     |
| 37 | M136LH | F7         | 10 | 6.55e-04 | 210   | NFP   | NA                     |
| 37 | M136LH | F6         | 10 | 2.49e-05 | 8     | NFP   | NA                     |
| 37 | M136LH | F4         | 10 | 6.23e-06 | 2     | NFP   | NA                     |
| 37 | M136LH | F5         | 10 | 3.12e-05 | 10    | Known | (48, 114)              |
| 37 | M136LH | 9          | 10 | 9.98e-02 | 32009 | Known | (46, 48, 114-115)      |
| 37 | M136LH | 46d        | 10 | 1.15e-01 | 36892 | Known | (48, 114-115)          |
| 37 | M136LH | 46v        | 10 | 8.05e-02 | 25822 | Known | (48, 114-115)          |
| 37 | M136LH | 9/46d      | 10 | 8.60e-03 | 2758  | Known | (48, 114-115)          |
| 37 | M136LH | 9/46v      | 10 | 2.49e-05 | 8     | Known | (114-115)              |
| 37 | M136LH | 8B         | 10 | 1.53e-02 | 4912  | Known | (114-115)              |
| 37 | M136LH | 8l         | 10 | 7.48e-05 | 24    | Known | (114-115)              |
| 37 | M136LH | 8m         | 10 | 1.84e-03 | 590   | Known | (47, 114-115)          |
| 37 | M136LH | 8r         | 10 | 3.12e-05 | 10    | NFP   | NA                     |
| 37 | M136LH | 45B        | 10 | 1.31e-04 | 42    | Known | (115)                  |
| 37 | M136LH | 45A        | 10 | 6.23e-05 | 20    | Known | (48, 115)              |
| 37 | M136LH | 44         | 10 | 2.49e-05 | 8     | Known | (115)                  |
| 37 | M136LH | OPRO       | 10 | 5.52e-02 | 17696 | Known | (46, 48, 114)          |
| 37 | M136LH | OPAI       | 10 | 1.30e-03 | 418   | Known | (46, 48)               |
| 37 | M136LH | 11         | 10 | 9.10e-02 | 29178 | Known | (46, 48, 114-115)      |
| 37 | M136LH | 14         | 10 | 2.28e-01 | 73291 | Known | (46, 48, 114-115)      |
| 37 | M136LH | 25         | 10 | 2.03e-02 | 6525  | Known | (46, 48, 114-115)      |
| 37 | M136LH | 12         | 10 | 6.07e-02 | 19483 | Known | (44, 46, 48, 114-115)  |
| 37 | M136LH | 13         | 10 | 3.27e-02 | 10484 | Known | (46, 48, 114-115)      |
| 38 | M137LH | Pro.St.    | 10 | 3.47e-04 | 94    | Known | (114-115)              |
| 38 | M137LH | 7A         | 10 | 1.48e-05 | 4     | NFP   | NA                     |
| 38 | M137LH | LIP        | 10 | 7.39e-06 | 2     | NFP   | NA                     |
| 38 | M137LH | DP         | 10 | 7.39e-06 | 2     | NFP   | NA                     |
| 38 | M137LH | STPr       | 10 | 2.41e-02 | 6514  | Known | (38, 115)              |
| 38 | M137LH | STPi       | 10 | 1.77e-02 | 4792  | Known | (38, 114-115)          |
| 38 | M137LH | STPc       | 10 | 1.54e-03 | 416   | Known | (38, 115)              |
| 38 | M137LH | PGa        | 10 | 1.95e-03 | 528   | NFP   | NA                     |
| 38 | M137LH | IPa        | 10 | 2.29e-04 | 62    | NFP   | NA                     |



|    |        |            |    |          |       |       |                        |
|----|--------|------------|----|----------|-------|-------|------------------------|
| 38 | M137LH | FST        | 10 | 2.22e-05 | 6     | NFP   | NA                     |
| 38 | M137LH | PERI       | 10 | 2.22e-04 | 60    | Known | (57, 114-115)          |
| 38 | M137LH | TEav       | 10 | 1.48e-05 | 4     | Known | (114)                  |
| 38 | M137LH | TEpv       | 10 | 1.48e-05 | 4     | NFP   | NA                     |
| 38 | M137LH | TEa/ma     | 10 | 7.39e-06 | 2     | Known | (114-115)              |
| 38 | M137LH | ENTO       | 10 | 3.70e-05 | 10    | Known | (114-115)              |
| 38 | M137LH | TH/TF      | 10 | 2.14e-03 | 580   | Known | (25, 38, 57, 114-115)  |
| 38 | M137LH | SUB        | 10 | 4.43e-05 | 12    | NFP   | NA                     |
| 38 | M137LH | POLE       | 10 | 3.10e-02 | 8384  | Known | (38, 54, 114-116)      |
| 38 | M137LH | CORE       | 10 | 2.44e-04 | 66    | Known | (115)                  |
| 38 | M137LH | MB         | 10 | 1.10e-03 | 297   | Known | (115)                  |
| 38 | M137LH | LB         | 10 | 5.47e-04 | 148   | Known | (41, 115-116)          |
| 38 | M137LH | PBr        | 10 | 4.31e-02 | 11675 | Known | (38, 115-116)          |
| 38 | M137LH | PBc        | 10 | 6.36e-04 | 172   | Known | (36, 38, 115-116)      |
| 38 | M137LH | Parainsula | 10 | 3.62e-04 | 98    | Known | (115)                  |
| 38 | M137LH | INSULA     | 10 | 1.29e-04 | 35    | Known | (114-115)              |
| 38 | M137LH | 23         | 10 | 3.38e-03 | 914   | Known | (42, 114-115)          |
| 38 | M137LH | 24a        | 10 | 5.17e-04 | 140   | Known | (114-115)              |
| 38 | M137LH | 24b        | 10 | 1.41e-03 | 382   | Known | (48, 114-115)          |
| 38 | M137LH | 24c        | 10 | 5.19e-03 | 1404  | Known | (48, 114-115)          |
| 38 | M137LH | 24d        | 10 | 1.11e-05 | 3     | NFP   | NA                     |
| 38 | M137LH | 29/30      | 10 | 1.37e-03 | 372   | Known | (42, 114-115)          |
| 38 | M137LH | 31         | 10 | 1.48e-05 | 4     | Known | (64, 114)              |
| 38 | M137LH | 32         | 10 | 2.12e-02 | 5724  | Known | (46, 48, 114-115, 117) |
| 38 | M137LH | F2         | 10 | 1.48e-05 | 4     | NFP   | NA                     |
| 38 | M137LH | F7         | 10 | 2.95e-03 | 798   | NFP   | NA                     |
| 38 | M137LH | F6         | 10 | 5.91e-05 | 16    | NFP   | NA                     |
| 38 | M137LH | 9          | 10 | 8.18e-02 | 22144 | Known | (46, 48, 114-115)      |
| 38 | M137LH | 46d        | 10 | 1.70e-01 | 46016 | Known | (48, 114-115)          |
| 38 | M137LH | 46v        | 10 | 1.20e-01 | 32352 | Known | (48, 114-115)          |
| 38 | M137LH | 9/46d      | 10 | 3.24e-02 | 8780  | Known | (48, 114-115)          |
| 38 | M137LH | 9/46v      | 10 | 4.43e-05 | 12    | Known | (114-115)              |
| 38 | M137LH | 8B         | 10 | 3.22e-02 | 8708  | Known | (114-115)              |
| 38 | M137LH | 8l         | 10 | 5.17e-05 | 14    | Known | (114-115)              |
| 38 | M137LH | 8m         | 10 | 3.12e-03 | 844   | Known | (47, 114-115)          |
| 38 | M137LH | 8r         | 10 | 5.91e-05 | 16    | NFP   | NA                     |
| 38 | M137LH | 45B        | 10 | 7.17e-04 | 194   | Known | (115)                  |
| 38 | M137LH | 45A        | 10 | 1.03e-02 | 2776  | Known | (48, 115)              |
| 38 | M137LH | OPRO       | 10 | 1.33e-02 | 3612  | Known | (46, 48, 114)          |
| 38 | M137LH | OPAI       | 10 | 2.07e-04 | 56    | Known | (46, 48)               |
| 38 | M137LH | 11         | 10 | 2.75e-03 | 744   | Known | (46, 48, 114-115)      |
| 38 | M137LH | 14         | 10 | 2.67e-01 | 72348 | Known | (46, 48, 114-115)      |
| 38 | M137LH | 25         | 10 | 4.89e-03 | 1324  | Known | (46, 48, 114-115)      |
| 38 | M137LH | 12         | 10 | 6.75e-02 | 18256 | Known | (44, 46, 48, 114-115)  |
| 38 | M137LH | 13         | 10 | 3.21e-02 | 8700  | Known | (46, 48, 114-115)      |

|    |         |            |    |          |       |       |                        |
|----|---------|------------|----|----------|-------|-------|------------------------|
| 39 | BB341LH | Pro.St.    | 10 | 4.67e-04 | 136   | Known | (114-115)              |
| 39 | BB341LH | LIP        | 10 | 3.43e-06 | 1     | NFP   | NA                     |
| 39 | BB341LH | STPr       | 10 | 4.73e-02 | 13788 | Known | (38, 115)              |
| 39 | BB341LH | STPi       | 10 | 1.30e-02 | 3772  | Known | (38, 114-115)          |
| 39 | BB341LH | STPc       | 10 | 6.70e-04 | 195   | Known | (38, 115)              |
| 39 | BB341LH | PGa        | 10 | 1.27e-03 | 370   | NFP   | NA                     |
| 39 | BB341LH | IPa        | 10 | 4.12e-05 | 12    | NFP   | NA                     |
| 39 | BB341LH | FST        | 10 | 2.16e-04 | 63    | NFP   | NA                     |
| 39 | BB341LH | MST        | 10 | 2.06e-05 | 6     | NFP   | NA                     |
| 39 | BB341LH | PERI       | 10 | 1.79e-04 | 52    | Known | (57, 114-115)          |
| 39 | BB341LH | TEad       | 10 | 1.37e-05 | 4     | NFP   | NA                     |
| 39 | BB341LH | TEav       | 10 | 4.81e-05 | 14    | Known | (114)                  |
| 39 | BB341LH | TEpd       | 10 | 1.37e-05 | 4     | NFP   | NA                     |
| 39 | BB341LH | TEpv       | 10 | 2.06e-05 | 6     | NFP   | NA                     |
| 39 | BB341LH | TEa/ma     | 10 | 4.94e-04 | 144   | Known | (114-115)              |
| 39 | BB341LH | TEa/mp     | 10 | 4.12e-05 | 12    | NFP   | NA                     |
| 39 | BB341LH | ENTO       | 10 | 1.37e-04 | 40    | Known | (114-115)              |
| 39 | BB341LH | TH/TF      | 10 | 3.30e-04 | 96    | Known | (25, 38, 57, 114-115)  |
| 39 | BB341LH | SUB        | 10 | 7.55e-05 | 22    | NFP   | NA                     |
| 39 | BB341LH | POLE       | 10 | 3.04e-02 | 8854  | Known | (38, 54, 114-116)      |
| 39 | BB341LH | CORE       | 10 | 3.43e-05 | 10    | Known | (115)                  |
| 39 | BB341LH | MB         | 10 | 2.61e-04 | 76    | Known | (115)                  |
| 39 | BB341LH | LB         | 10 | 4.60e-04 | 134   | Known | (41, 115-116)          |
| 39 | BB341LH | PBr        | 10 | 1.30e-02 | 3790  | Known | (38, 115-116)          |
| 39 | BB341LH | PBc        | 10 | 5.77e-04 | 168   | Known | (36, 38, 115-116)      |
| 39 | BB341LH | Parainsula | 10 | 3.43e-04 | 100   | Known | (115)                  |
| 39 | BB341LH | INSULA     | 10 | 4.74e-04 | 138   | Known | (114-115)              |
| 39 | BB341LH | 23         | 10 | 2.77e-03 | 806   | Known | (42, 114-115)          |
| 39 | BB341LH | 24a        | 10 | 4.33e-04 | 126   | Known | (114-115)              |
| 39 | BB341LH | 24b        | 10 | 4.41e-03 | 1285  | Known | (48, 114-115)          |
| 39 | BB341LH | 24c        | 10 | 1.68e-02 | 4897  | Known | (48, 114-115)          |
| 39 | BB341LH | 24d        | 10 | 1.37e-05 | 4     | NFP   | NA                     |
| 39 | BB341LH | 29/30      | 10 | 1.35e-03 | 393   | Known | (42, 114-115)          |
| 39 | BB341LH | 31         | 10 | 2.06e-04 | 60    | Known | (64, 114)              |
| 39 | BB341LH | 32         | 10 | 8.12e-02 | 23635 | Known | (46, 48, 114-115, 117) |
| 39 | BB341LH | F2         | 10 | 6.18e-05 | 18    | NFP   | NA                     |
| 39 | BB341LH | F7         | 10 | 3.27e-03 | 953   | NFP   | NA                     |
| 39 | BB341LH | F3         | 10 | 6.87e-06 | 2     | NFP   | NA                     |
| 39 | BB341LH | F6         | 10 | 8.93e-05 | 26    | NFP   | NA                     |
| 39 | BB341LH | F4         | 10 | 6.87e-06 | 2     | NFP   | NA                     |
| 39 | BB341LH | F5         | 10 | 1.37e-05 | 4     | Known | (48, 114)              |
| 39 | BB341LH | 9          | 10 | 1.55e-01 | 45054 | Known | (46, 48, 114-115)      |
| 39 | BB341LH | 46d        | 10 | 2.41e-01 | 70086 | Known | (48, 114-115)          |
| 39 | BB341LH | 46v        | 10 | 2.95e-02 | 8588  | Known | (48, 114-115)          |
| 39 | BB341LH | 9/46d      | 10 | 3.76e-03 | 1096  | Known | (48, 114-115)          |

|    |         |       |    |          |       |       |                       |
|----|---------|-------|----|----------|-------|-------|-----------------------|
| 39 | BB341LH | 9/46v | 10 | 2.40e-05 | 7     | Known | (114-115)             |
| 39 | BB341LH | 8B    | 10 | 1.96e-02 | 5712  | Known | (114-115)             |
| 39 | BB341LH | 8l    | 10 | 5.49e-05 | 16    | Known | (114-115)             |
| 39 | BB341LH | 8m    | 10 | 2.80e-03 | 814   | Known | (47, 114-115)         |
| 39 | BB341LH | 8r    | 10 | 1.06e-03 | 308   | NFP   | NA                    |
| 39 | BB341LH | 45B   | 10 | 1.32e-03 | 385   | Known | (115)                 |
| 39 | BB341LH | 45A   | 10 | 3.24e-03 | 945   | Known | (48, 115)             |
| 39 | BB341LH | 44    | 10 | 5.49e-05 | 16    | Known | (115)                 |
| 39 | BB341LH | OPRO  | 10 | 2.79e-02 | 8131  | Known | (46, 48, 114)         |
| 39 | BB341LH | OPAI  | 10 | 4.94e-04 | 144   | Known | (46, 48)              |
| 39 | BB341LH | 11    | 10 | 5.91e-03 | 1721  | Known | (46, 48, 114-115)     |
| 39 | BB341LH | 14    | 10 | 1.97e-01 | 57506 | Known | (46, 48, 114-115)     |
| 39 | BB341LH | 25    | 10 | 1.89e-02 | 5515  | Known | (46, 48, 114-115)     |
| 39 | BB341LH | 12    | 10 | 6.11e-02 | 17781 | Known | (44, 46, 48, 114-115) |
| 39 | BB341LH | 13    | 10 | 1.09e-02 | 3175  | Known | (46, 48, 114-115)     |

Table S7. Stereotaxic coordinates of injection sites in the F99 atlas

| INJECTED AREA | CASE | MONKEY  | SECTION PLANE | NODE NUMBER | FIDUCIAL F99 (X,Y,Z) |       |       |
|---------------|------|---------|---------------|-------------|----------------------|-------|-------|
|               |      |         |               |             |                      |       |       |
| V1            | 1    | M81LH   | HORIZONTAL    | 30856       | 27.6                 | -34.9 | 5.3   |
| V1            | 2    | M85LH   | HORIZONTAL    | 30087       | 27.7                 | -35   | 3.7   |
| V1            | 3    | M85RH   | HORIZONTAL    | 30087       | 27.7                 | -35   | 3.7   |
| V1            | 4    | M88RH   | HORIZONTAL    | 30086       | 27.8                 | -34.7 | 3.1   |
| V1            | 5    | M121RH  | CORONAL       | 29325       | 26.3                 | -36.6 | 5.6   |
| V2            | 6    | M101LH  | CORONAL       | 33931       | 25.8                 | -32   | 9.2   |
| V2            | 7    | M101RH  | CORONAL       | 33163       | 26.9                 | -32.7 | 9     |
| V2            | 8    | M103LH  | CORONAL       | 33164       | 26.4                 | -32.7 | 9.4   |
| V4            | 9    | M121RH  | CORONAL       | 36206       | 29.9                 | -25.2 | 4.6   |
| V4            | 10   | M123LH  | CORONAL       | 37357       | 29.9                 | -25.7 | 4.2   |
| TEO           | 11   | M119LH  | CORONAL       | 28507       | 28.1                 | -25.3 | -4    |
| 9/46d         | 12   | M106LH  | CORONAL       | 62526       | 14.7                 | 14.3  | 16.1  |
| F5            | 13   | M106RH  | CORONAL       | 71691       | 24.8                 | 5.5   | 9.6   |
| 8m            | 14   | BB272LH | CORONAL       | 65890       | 14.4                 | 8.3   | 16.8  |
| 7A            | 15   | BB135LH | HORIZONTAL    | 57021       | 15.8                 | -26.9 | 20.8  |
| DP            | 16   | M89LH   | HORIZONTAL    | 47018       | 15.2                 | -30.1 | 18.4  |
| 2             | 17   | M98LH   | CORONAL       | 73334       | 27.8                 | -6.5  | 11.1  |
| 5             | 18   | M70LH   | HORIZONTAL    | 58987       | 17.4                 | -17.2 | 21.3  |
| 7B            | 19   | M68LH   | SAGITAL       | 69949       | 24.9                 | -16.2 | 15.7  |
| STPr          | 20   | BB289LH | CORONAL       | 52646       | 23.7                 | -2.6  | -8.2  |
| STPi          | 21   | BB289LH | CORONAL       | 60751       | 28.3                 | -10   | -1.7  |
| STPc          | 22   | M90RH   | HORIZONTAL    | 63769       | 23.9                 | -22   | 8.7   |
| PBr           | 23   | M108LH  | CORONAL       | 61894       | 28.8                 | -7.6  | 0.6   |
| Tepd          | 24   | M128LH  | CORONAL       | 34605       | 28.4                 | -13.2 | -11.2 |
| 24c           | 25   | NICORH  | CORONAL       | 48707       | 6.2                  | 12.7  | 14.2  |
| F1            | 26   | M69LH   | HORIZONTAL    | 65528       | 15.3                 | -8.4  | 22.8  |
| F2            | 27   | M102LH  | CORONAL       | 56369       | 4.6                  | 3.2   | 23.7  |
| F7            | 28   | M102LH  | CORONAL       | 57930       | 6.2                  | 15.9  | 19.8  |
| ProM          | 29   | M98LH   | CORONAL       | 69842       | 24.8                 | 8.5   | 1.8   |
| 8l            | 30   | BB272RH | CORONAL       | 66497       | 16.9                 | 7.6   | 16.5  |
| 9/46v         | 31   | M116RH  | CORONAL       | 64296       | 17.9                 | 13.4  | 13.2  |
| 46d           | 32   | M116RH  | CORONAL       | 57944       | 8.5                  | 19.8  | 13.9  |
| 8B            | 33   | M128LH  | CORONAL       | 57165       | 6.3                  | 18.5  | 18.8  |
| 10            | 34   | M131LH  | CORONAL       | 51414       | 3.7                  | 26.9  | 7     |
| MT            | 35   | M133LH  | CORONAL       | 51976       | 21.5                 | -23.8 | 6.2   |
| 7m            | 36   | M136LH  | CORONAL       | 24054       | 1.9                  | -27.1 | 19.2  |
| 10            | 37   | M136LH  | CORONAL       | 51030       | 3.5                  | 26.5  | 6.4   |
| 10            | 38   | M137LH  | CORONAL       | 51414       | 3.7                  | 26.9  | 7     |
| 10            | 39   | BB341LH | CORONAL       | 51414       | 3.7                  | 26.9  | 7     |

### 3) References for tables S1 and S6

1. M. K. Baldwin, P. M. Kaskan, B. Zhang, Y. M. Chino, J. H. Kaas, *The Journal of comparative neurology* 520, 544 (Feb 15, 2012).
2. P. Barone, A. Batardiere, K. Knoblauch, H. Kennedy, *J Neurosci* 20, 3263 (May 1, 2000).
3. D. J. Felleman, D. C. Van Essen, *Cereb Cortex* 1, 1 (Jan-Feb, 1991).
4. R. Gattas, A. P. Sousa, M. Mishkin, L. G. Ungerleider, *Cereb Cortex* 7, 110 (Mar, 1997).
5. D. J. Perkel, J. Bullier, H. Kennedy, *The Journal of comparative neurology* 253, 374 (Nov 15, 1986).
6. K. S. Rockland, D. N. Pandya, *Brain Res* 179, 3 (Dec 21, 1979).
7. K. S. Rockland, G. W. Van Hoesen, *Cereb Cortex* 4, 300 (May-Jun, 1994).
8. K. S. Rockland, A. Virga, *The Journal of comparative neurology* 285, 54 (Jul 1, 1989).
9. D. J. Felleman, A. Burkhalter, D. C. Van Essen, *The Journal of comparative neurology* 379, 21 (Mar 3, 1997).
10. K. S. Rockland, K. S. Saleem, K. Tanaka, *Visual neuroscience* 11, 579 (May-Jun, 1994).
11. L. G. Ungerleider, T. W. Galkin, R. Desimone, R. Gattass, *Cereb Cortex* 18, 477 (Mar, 2008).
12. A. Falchier, S. Clavagnier, P. Barone, H. Kennedy, *J Neurosci* 22, 5749 (Jul 1, 2002).
13. J. H. Maunsell, D. C. van Essen, *J Neurosci* 3, 2563 (Dec, 1983).
14. L. G. Ungerleider, R. Desimone, *The Journal of comparative neurology* 248, 147 (Jun 8, 1986).
15. S. Clavagnier, A. Falchier, H. Kennedy, *Cognitive, affective & behavioral neuroscience* 4, 117 (Jun, 2004).
16. I. Stepniewska, J. H. Kaas, *The Journal of comparative neurology* 371, 129 (Jul 15, 1996).
17. R. Gattass et al., *Philos Trans R Soc Lond B Biol Sci* 360, 709 (Apr 29, 2005).
18. C. Cavada, P. S. Goldman-Rakic, *The Journal of comparative neurology* 287, 393 (Sep 22, 1989).
19. B. Seltzer, D. N. Pandya, *The Journal of comparative neurology* 312, 625 (Oct 22, 1991).
20. D. Boussaoud, L. G. Ungerleider, R. Desimone, *The Journal of comparative neurology* 296, 462 (Jun 15, 1990).
21. C. Distler, D. Boussaoud, R. Desimone, L. G. Ungerleider, *The Journal of comparative neurology* 334, 125 (Aug 1, 1993).
22. G. B. Stanton, C. J. Bruce, M. E. Goldberg, *The Journal of comparative neurology* 353, 291 (Mar 6, 1995).
23. I. Stepniewska, C. E. Collins, J. H. Kaas, *Cereb Cortex* 15, 809 (Jun, 2005).
24. G. J. Blatt, *The Journal of comparative neurology* 299, 421 (1990).
25. P. Lavenex, W. A. Suzuki, D. G. Amaral, *The Journal of comparative neurology* 447, 394 (Jun 10, 2002).
26. J. Bullier, J. D. Schall, A. Morel, *Behav Brain Res* 76, 89 (Apr, 1996).
27. A. Morel, J. Bullier, *Visual neuroscience* 4, 555 (Jun, 1990).
28. M. J. Webster, J. Bachevalier, L. G. Ungerleider, *Cereb Cortex* 4, 470 (Sep-Oct, 1994).
29. R. A. Andersen, C. Asanuma, G. Essick, R. M. Siegel, *The Journal of comparative neurology* 296, 65 (Jun 1, 1990).
30. S. L. Ding, G. Van Hoesen, K. S. Rockland, *The Journal of comparative neurology* 425, 510 (Oct 2, 2000).
31. M. J. Webster, L. G. Ungerleider, J. Bachevalier, *J Neurosci* 11, 1095 (Apr, 1991).
32. K. S. Saleem, W. Suzuki, K. Tanaka, T. Hashikawa, *J Neurosci* 20, 5083 (Jul 1, 2000).
33. J. D. Schall, A. Morel, D. J. King, J. Bullier, *J Neurosci* 15, 4464 (Jun, 1995).
34. M. Petrides, D. N. Pandya, *Eur J Neurosci* 11, 1011 (Mar, 1999).
35. P. B. Cipolloni, D. N. Pandya, *The Journal of comparative neurology* 403, 431 (Jan 25, 1999).
36. M. Petrides, D. N. Pandya, *PLoS Biol* 7, e1000170 (Aug, 2009).
37. M. Petrides, D. N. Pandya, *The Journal of comparative neurology* 228, 105 (Sep 1, 1984).
38. K. S. Saleem, H. Kondo, J. L. Price, *The Journal of comparative neurology* 506, 659 (Feb 1, 2008).
39. B. Seltzer, D. N. Pandya, *The Journal of comparative neurology* 281, 97 (Mar 1, 1989).
40. T. A. Hackett, I. Stepniewska, J. H. Kaas, *Brain Res* 817, 45 (Jan 30, 1999).

41. L. M. Romanski et al., *Nature neuroscience* 2, 1131 (Dec, 1999).
42. Y. Kobayashi, D. G. Amaral, *The Journal of comparative neurology* 502, 810 (Jun 10, 2007).
43. R. Morris, M. Petrides, D. N. Pandya, *Eur J Neurosci* 11, 2506 (Jul, 1999).
44. H. Barbas, D. N. Pandya, *The Journal of comparative neurology* 286, 353 (Aug 15, 1989).
45. D. N. Pandya, G. W. Van Hoesen, M. M. Mesulam, *Exp Brain Res* 42, 319 (1981).
46. H. Barbas, C. C. Hilgetag, S. Saha, C. R. Dermon, J. L. Suski, *BMC Neurosci* 6, 32 (2005).
47. M. Petrides, D. N. Pandya, *The Journal of comparative neurology* 498, 227 (Sep 10, 2006).
48. S. T. Carmichael, J. L. Price, *The Journal of comparative neurology* 371, 179 (Jul 22, 1996).
49. M. Gerbella, A. Belmalih, E. Borra, S. Rozzi, G. Luppino, *Brain Struct Funct* 216, 43 (Dec 5, 2011).
50. M. Matelli, R. Camarda, M. Glickstein, G. Rizzolatti, *The Journal of comparative neurology* 251, 281 (Sep 15, 1986).
51. O. A. Gharbawie, I. Stepniewska, H. Qi, J. H. Kaas, *J Neurosci* 31, 11660 (Aug 10, 2011).
52. J. Tanne-Gariepy, E. M. Rouiller, D. Boussaoud, *Exp Brain Res* 145, 91 (Jul, 2002).
53. G. Luppino, A. Murata, P. Govoni, M. Matelli, *Exp Brain Res* 128, 181 (Sep, 1999).
54. H. Kondo, K. S. Saleem, J. L. Price, *The Journal of comparative neurology* 465, 499 (Oct 27, 2003).
55. H. Barbas, D. N. Pandya, *The Journal of comparative neurology* 256, 211 (Feb 8, 1987).
56. M. F. Huerta, L. A. Krubitzer, J. H. Kaas, *The Journal of comparative neurology* 265, 332 (Nov 15, 1987).
57. H. Kondo, K. S. Saleem, J. L. Price, *The Journal of comparative neurology* 493, 479 (Dec 26, 2005).
58. R. A. Andersen, C. Asanuma, W. M. Cowan, *The Journal of comparative neurology* 232, 443 (Feb 22, 1985).
59. J. W. Neal, R. C. Pearson, T. P. Powell, *Brain Res* 532, 249 (Nov 5, 1990).
60. S. Rozzi et al., *Cereb Cortex* 16, 1389 (Oct, 2006).
61. I. Divac, J. H. Lavail, P. Rakic, K. R. Winston, *Brain Res* 123, 197 (Mar 11, 1977).
62. D. N. Pandya, B. Seltzer, *The Journal of comparative neurology* 204, 196 (Jan 10, 1982).
63. M. G. Maioli, S. Squatrito, B. G. Samolsky-Dekel, E. R. Sanseverino, *Brain Res* 789, 118 (Apr 6, 1998).
64. J. Parvizi, G. W. Van Hoesen, J. Buckwalter, A. Damasio, *Proc Natl Acad Sci U S A* 103, 1563 (Jan 31, 2006).
65. C. L. Barnes, D. N. Pandya, *The Journal of comparative neurology* 318, 222 (Apr 8, 1992).
66. M. Munoz, R. Insausti, *Eur J Neurosci* 22, 1368 (Sep, 2005).
67. C. Cavada, P. S. Goldman-Rakic, *The Journal of comparative neurology* 287, 422 (Sep 22, 1989).
68. C. Galletti et al., *Eur J Neurosci* 13, 1572 (Apr, 2001).
69. T. P. Pons, J. H. Kaas, *The Journal of comparative neurology* 248, 313 (Jun 15, 1986).
70. E. G. Jones, J. D. Coulter, S. H. Hendry, *The Journal of comparative neurology* 181, 291 (Sep 15, 1978).
71. S. Bakola, M. Gamberini, L. Passarelli, P. Fattori, C. Galletti, *Cereb Cortex* 20, 2592 (Nov, 2010).
72. M. Gamberini et al., *The Journal of comparative neurology* 513, 622 (Apr 20, 2009).
73. B. Marconi et al., *Cereb Cortex* 11, 513 (Jun, 2001).
74. J. W. Lewis, D. C. Van Essen, *The Journal of comparative neurology* 428, 112 (Dec 4, 2000).
75. J. W. Neal, R. C. Pearson, T. P. Powell, *Brain Res* 524, 119 (Jul 30, 1990).
76. C. G. Cusick, B. Seltzer, M. Cola, E. Griggs, *The Journal of comparative neurology* 360, 513 (Sep 25, 1995).
77. J. Padberg, B. Seltzer, C. G. Cusick, *The Journal of comparative neurology* 467, 418 (Dec 15, 2003).
78. B. Seltzer, D. N. Pandya, *The Journal of comparative neurology* 343, 445 (May 15, 1994).
79. B. Seltzer, D. N. Pandya, *The Journal of comparative neurology* 290, 451 (Dec 22, 1989).
80. A. M. Galaburda, D. N. Pandya, *The Journal of comparative neurology* 221, 169 (Dec 1, 1983).
81. H. Barbas et al., *Cereb Cortex* 15, 1356 (Sep, 2005).

82. P. B. Cipolloni, D. N. Pandya, *The Journal of comparative neurology* 281, 567 (Mar 22, 1989).
83. T. A. Hackett, I. Stepniewska, J. H. Kaas, *The Journal of comparative neurology* 394, 475 (May 18, 1998).
84. M. Yukie, *Neurosci Res* 22, 179 (May, 1995).
85. M. Medalla, P. Lera, M. Feinberg, H. Barbas, *Cereb Cortex* 17 Suppl 1, i136 (Sep, 2007).
86. E. Borra, N. Ichinohe, T. Sato, M. Tanifuji, K. S. Rockland, *Cereb Cortex* 20, 257 (Feb, 2010).
87. M. Gerbella, A. Belmalih, E. Borra, S. Rozzi, G. Luppino, *Cereb Cortex* 20 141 (Apr 30, 2010).
88. R. J. Morecraft et al., *Brain Res Bull* 87, 457 (Mar 10, 2012).
89. R. J. Morecraft, G. W. Van Hoesen, *Brain Res Bull* 45, 209 (1998).
90. R. J. Morecraft, G. W. Van Hoesen, *The Journal of comparative neurology* 337, 669 (Nov 22, 1993).
91. N. Hatanaka et al., *The Journal of comparative neurology* 462, 121 (Jul 14, 2003).
92. M. Takada et al., *Eur J Neurosci* 19, 3328 (Jun, 2004).
93. J. F. Bates, P. S. Goldman-Rakic, *The Journal of comparative neurology* 336, 211 (Oct 8, 1993).
94. G. R. Leichnetz, *The Journal of comparative neurology* 254, 460 (Dec 22, 1986).
95. P. B. Johnson, S. Ferraina, L. Bianchi, R. Caminiti, *Cereb Cortex* 6, 102 (Mar-Apr, 1996).
96. C. Darian-Smith, I. Darian-Smith, K. Burman, N. Ratcliffe, *The Journal of comparative neurology* 335, 200 (Sep 8, 1993).
97. S. Ghosh, C. Brinkman, R. Porter, *The Journal of comparative neurology* 259, 424 (May 15, 1987).
98. H. Tokuno, M. Takada, A. Nambu, M. Inase, *The Journal of comparative neurology* 389, 34 (Dec 8, 1997).
99. M. Matelli, P. Govoni, C. Galletti, D. F. Kutz, G. Luppino, *The Journal of comparative neurology* 402, 327 (Dec 21, 1998).
100. N. Hatanaka, H. Tokuno, A. Nambu, T. Inoue, M. Takada, *The Journal of comparative neurology* 492, 401 (Nov 28, 2005).
101. G. Luppino, M. Matelli, R. Camarda, G. Rizzolatti, *The Journal of comparative neurology* 338, 114 (Dec 1, 1993).
102. R. Caminiti et al., *Eur J Neurosci* 11, 3339 (Sep, 1999).
103. S. Ghosh, R. Gattera, *Somatosens Mot Res* 12, 359 (1995).
104. G. Luppino, R. Calzavara, S. Rozzi, M. Matelli, *Eur J Neurosci* 14, 1035 (Sep, 2001).
105. G. Luppino, S. Rozzi, R. Calzavara, M. Matelli, *Eur J Neurosci* 17, 559 (Feb, 2003).
106. M. F. Huerta, J. H. Kaas, *The Journal of comparative neurology* 293, 299 (Mar 8, 1990).
107. M. Petrides, D. N. Pandya, *J Neurosci* 27, 11573 (Oct 24, 2007).
108. E. Borra et al., *Cereb Cortex* 18, 1094 (May, 2008).
109. H. Barbas, *The Journal of comparative neurology* 276, 313 (Oct 15, 1988).
110. M. Gerbella, E. Borra, S. Tonelli, S. Rozzi, G. Luppino, *Cereb Cortex*, (Apr 11, 2012).
111. M. Petrides, D. N. Pandya, *Eur J Neurosci* 16, 291 (Jul, 2001).
112. T. M. Preuss, P. S. Goldman-Rakic, *The Journal of comparative neurology* 282, 293 (Apr 8, 1989).
113. H. Barbas, M. M. Mesulam, *Neuroscience* 15, 619 (Jul, 1985).
114. H. Barbas, H. Ghashghaei, S. M. Dombrowski, N. L. Rempel-Clower, *The Journal of comparative neurology* 410, 343 (Aug 2, 1999).
115. C. Cavada, T. Company, J. Tejedor, R. J. Cruz-Rizzolo, F. Reinoso-Suarez, *Cereb Cortex* 10, 220 (Mar, 2000).
116. L. M. Romanski, J. F. Bates, P. S. Goldman-Rakic, *The Journal of comparative neurology* 403, 141 (Jan 11, 1999).
117. M. Medalla, H. Barbas, *J Neurosci* 30, 16068 (Dec 1, 2010).
118. J. C. Anderson, K. A. Martin, *The Journal of comparative neurology* 443, 56 (Jan 28, 2002).
119. R. J. Morecraft, P. B. Cipolloni, K. S. Stilwell-Morecraft, M. T. Gedney, D. N. Pandya, *The Journal of comparative neurology* 469, 37 (Jan 26, 2004).

#### 4) Supplementary figures

Figure S1 - Locations of 39 injection sites represented on the F99 atlas surface

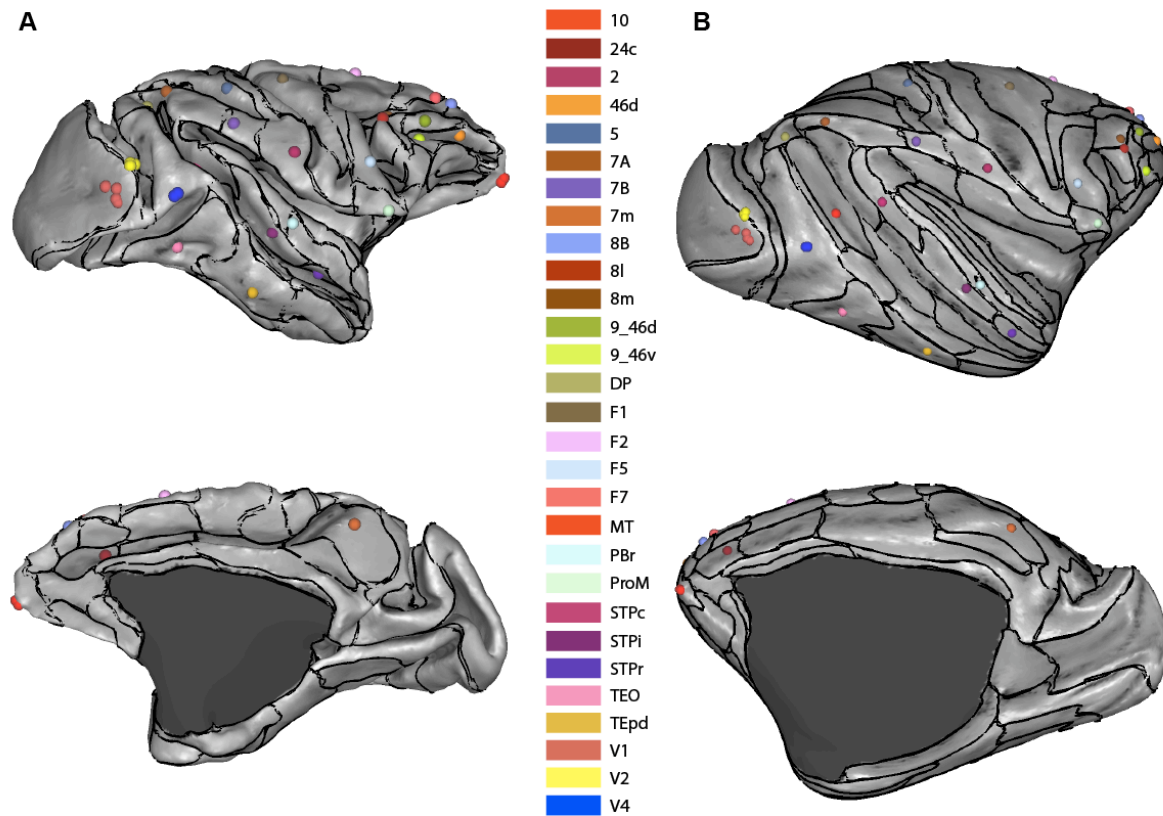

Each injection site center was identified on histological section contours, and its location relative to areal boundaries used to estimate its atlas location (see Methods). **A:** The 39 injection sites are represented on the F99 reference brain on lateral (upper) and medial (lower) views. **B:** Injections sites reported onto the inflated representation of F99. Colour key as in Figure 1. Stereotaxic coordinates on F99 see Table S7.



Figure S2 - Charts of labeled neurons

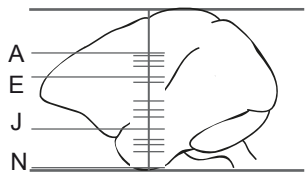

**Case 1: M081LH**

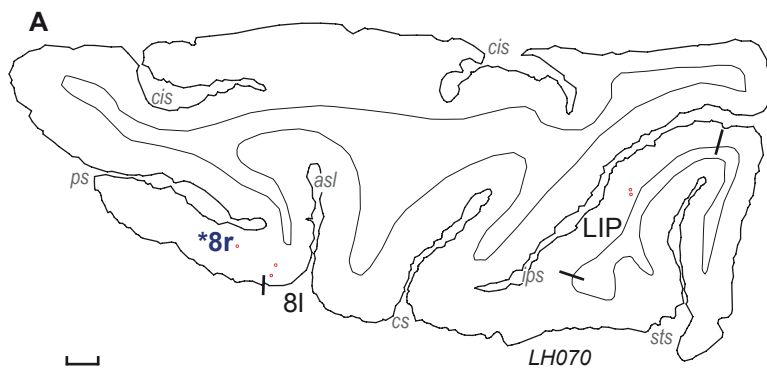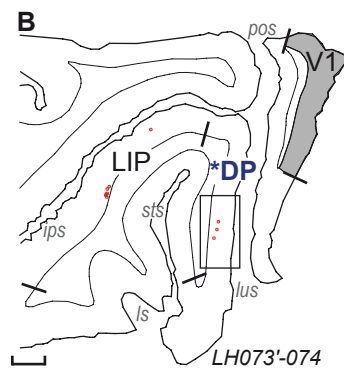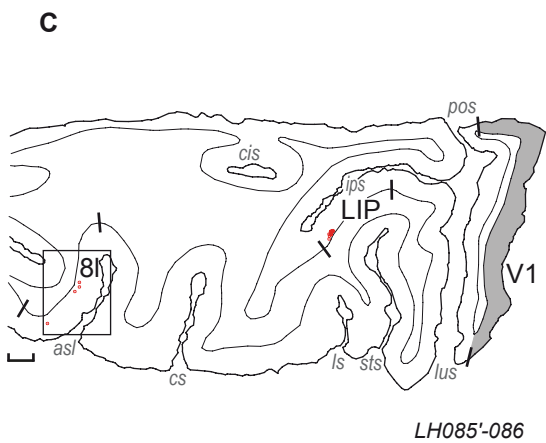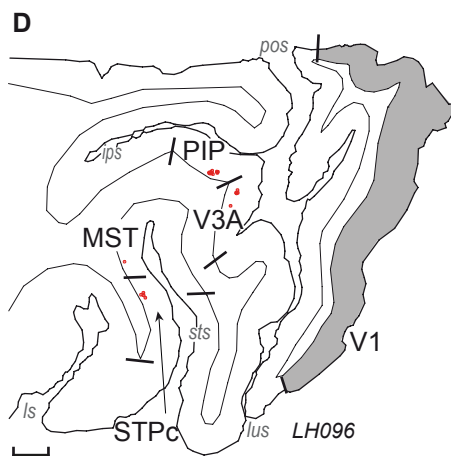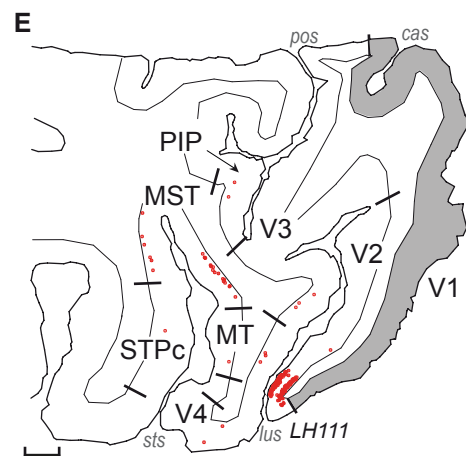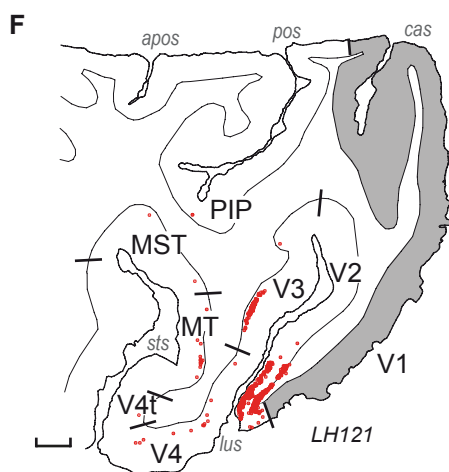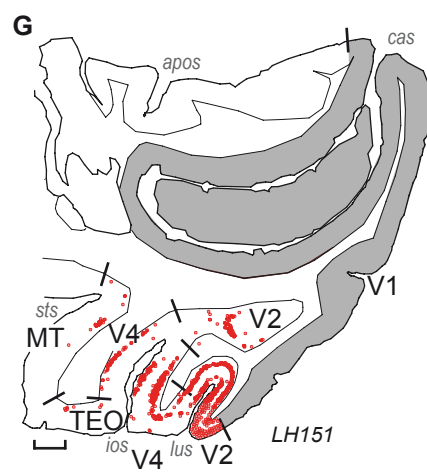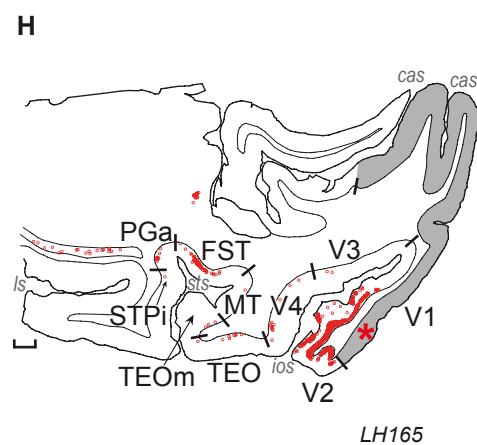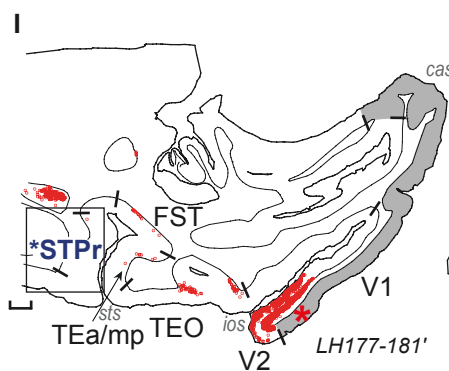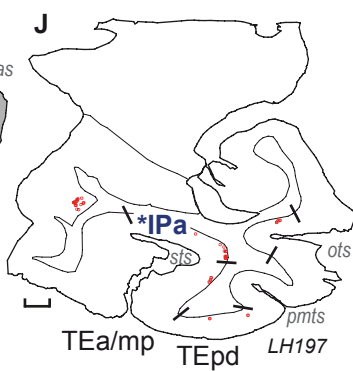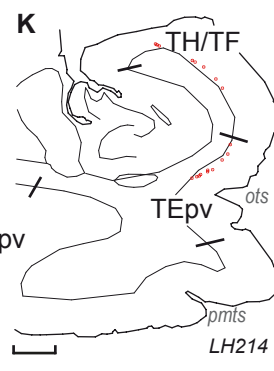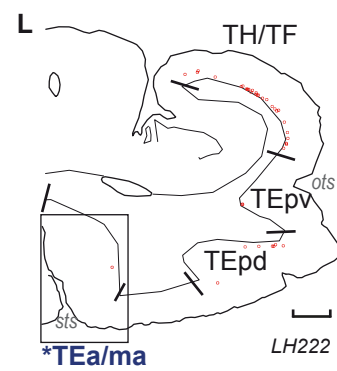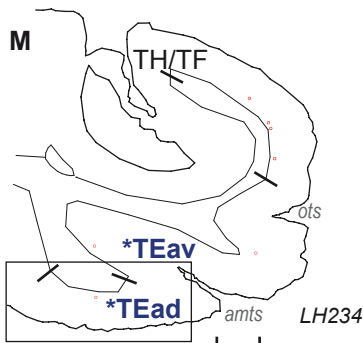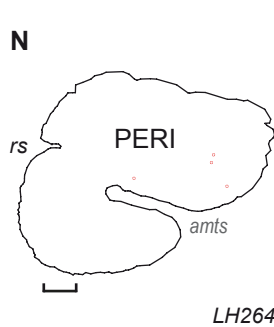

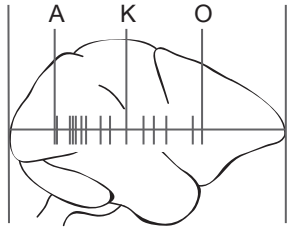

**Case 8: M103LH**

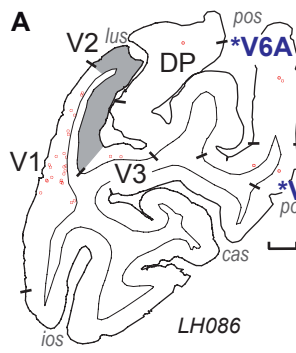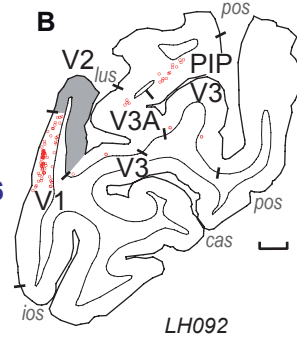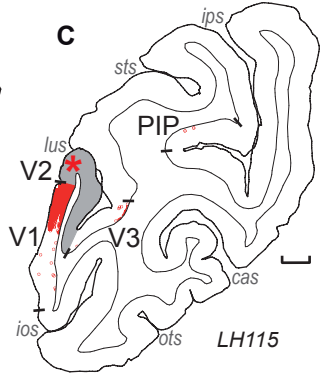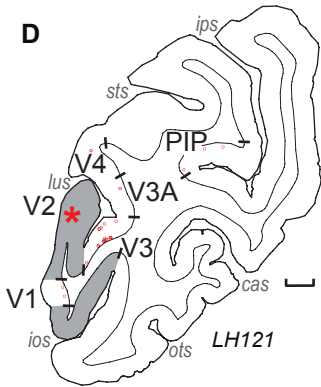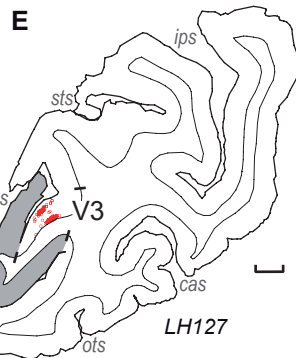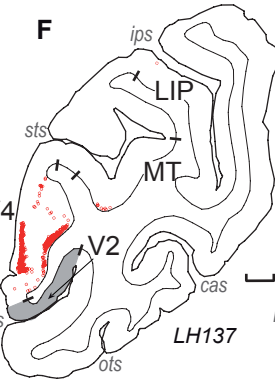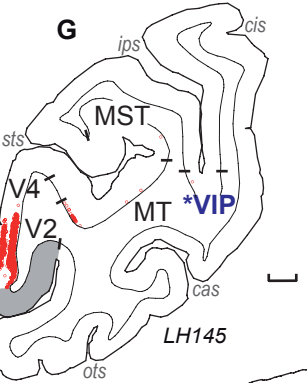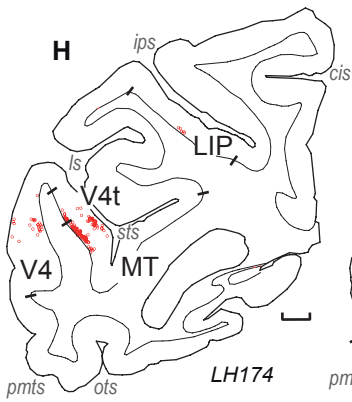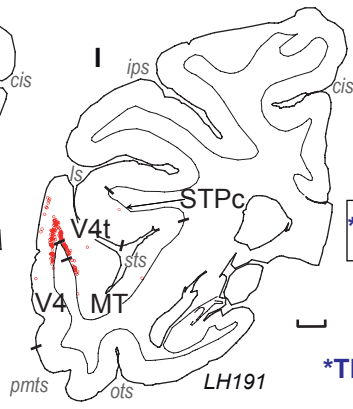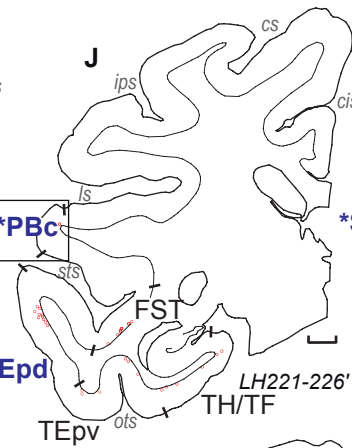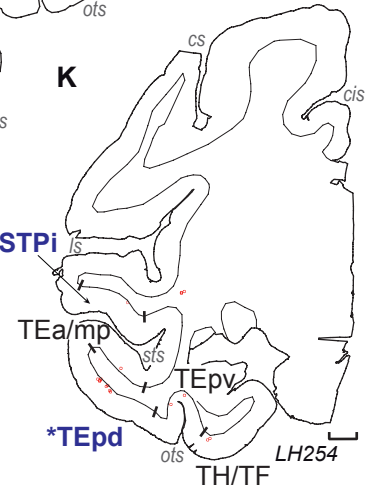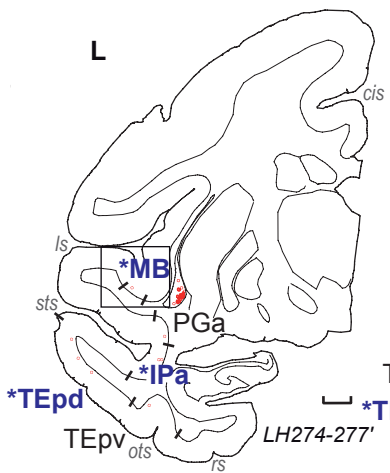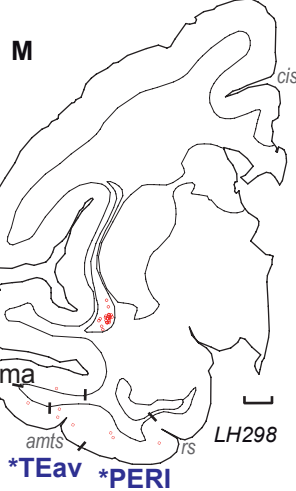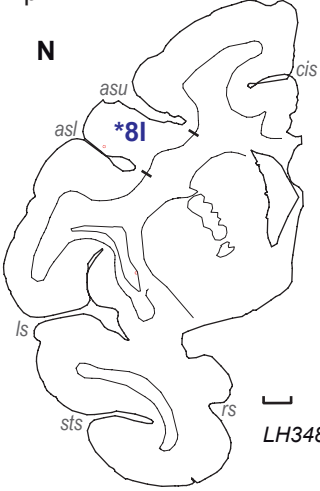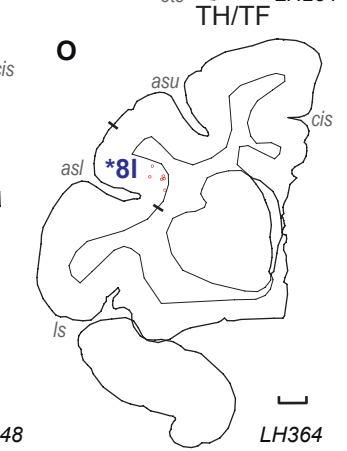

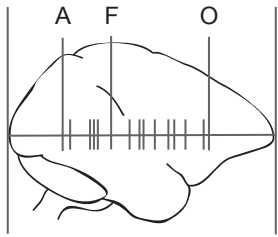

**Case 9: M121RH**

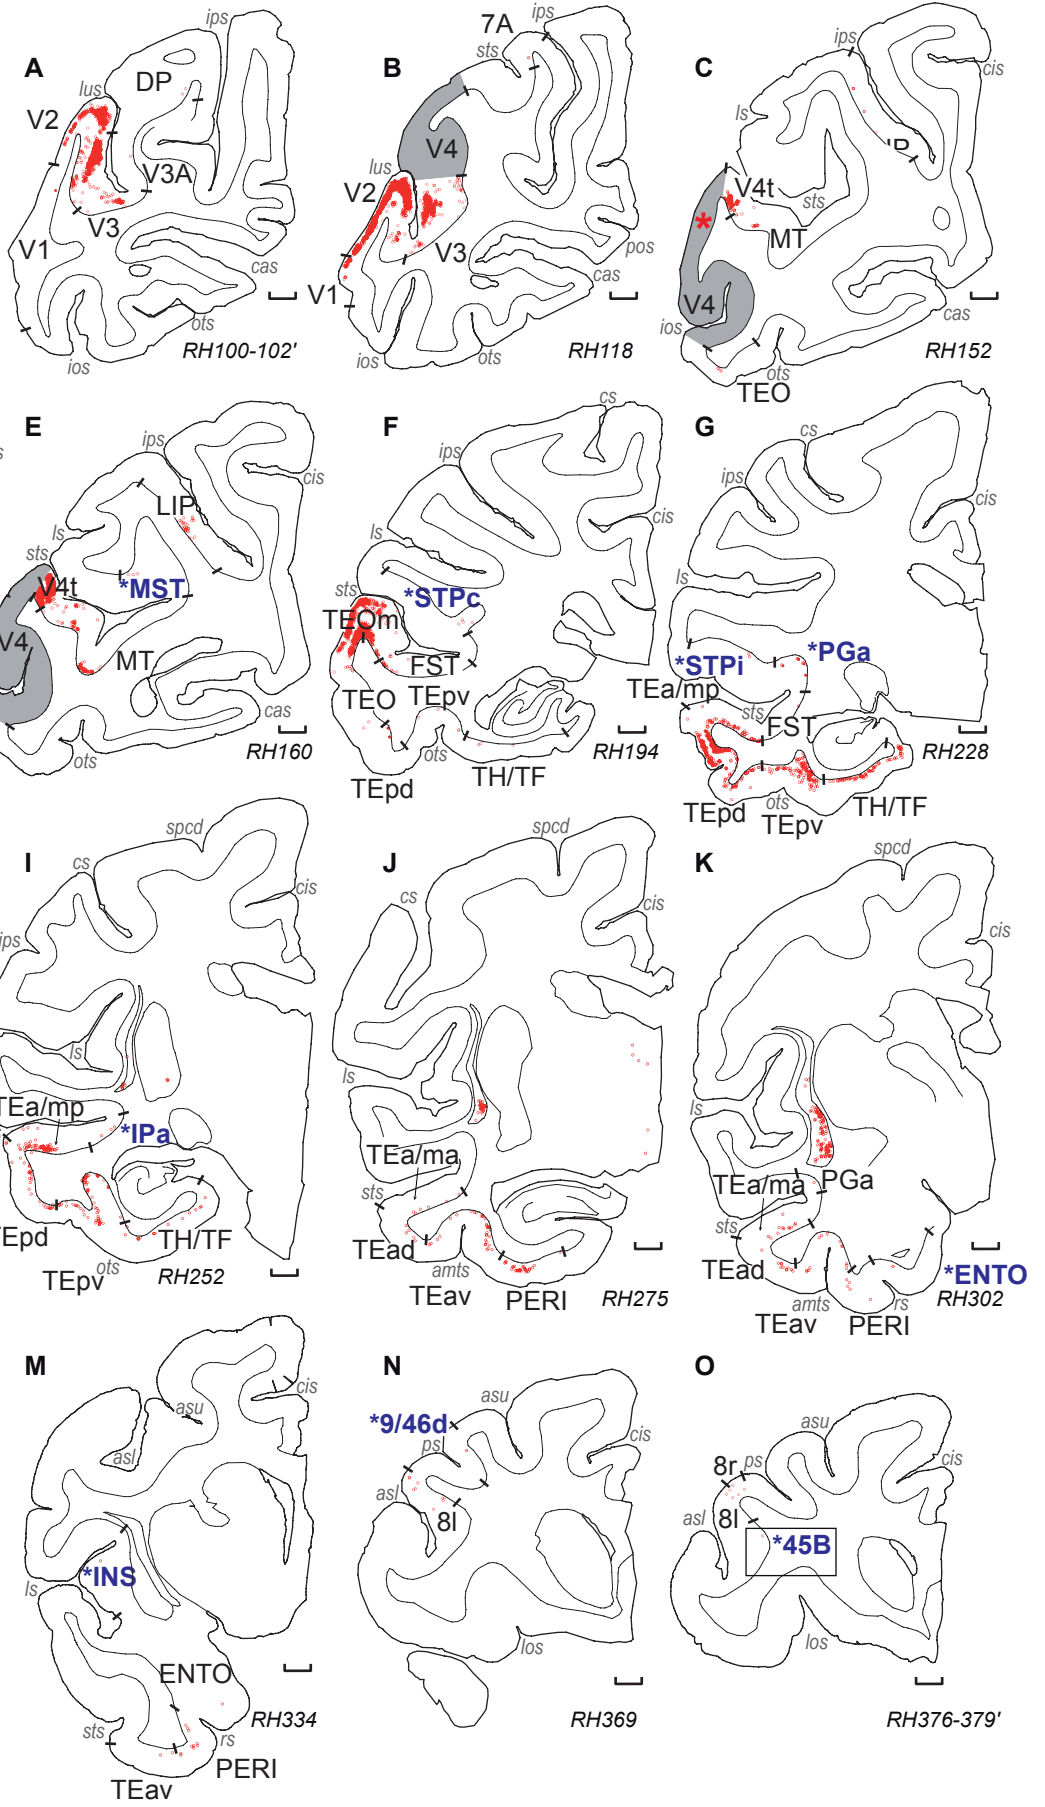

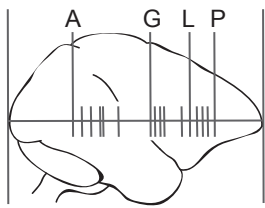

**Case 11: M119LH**

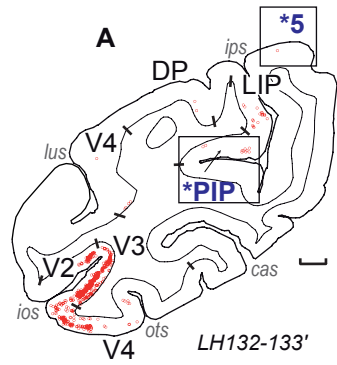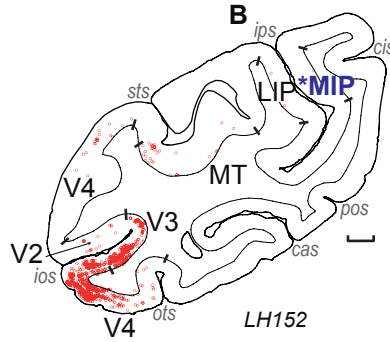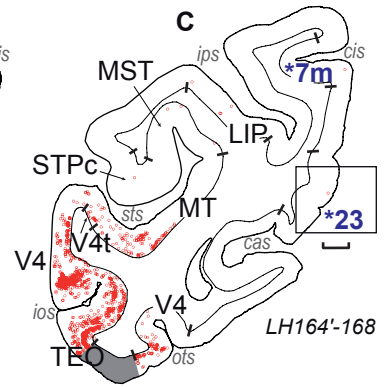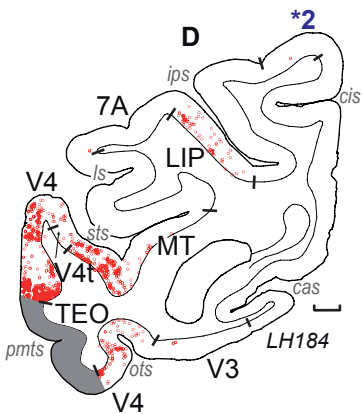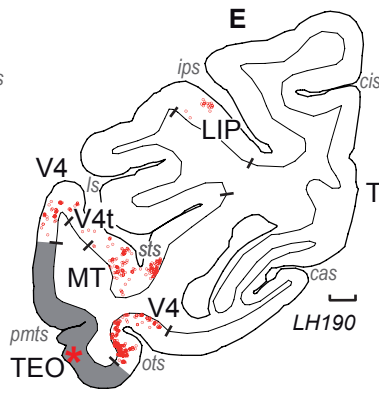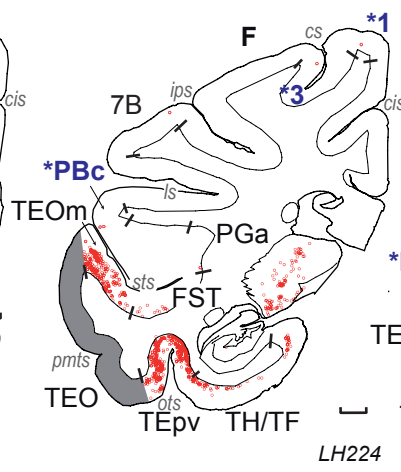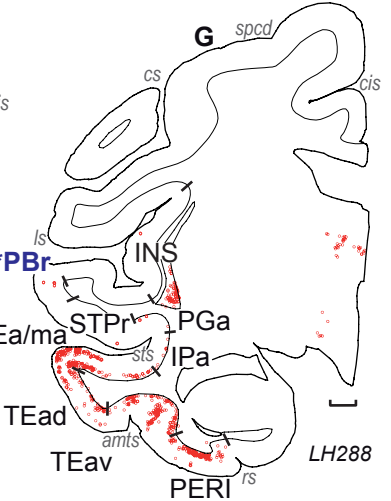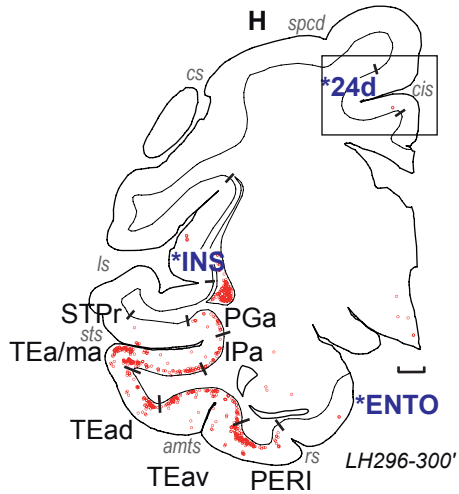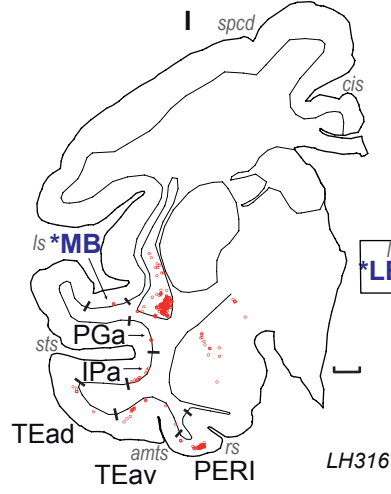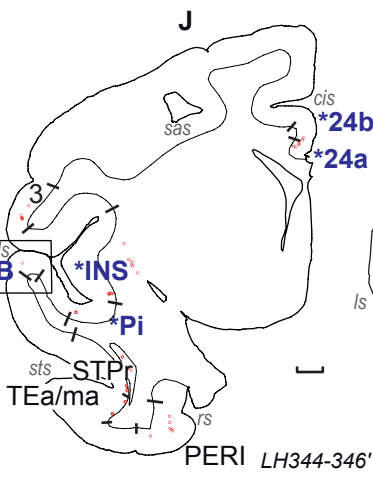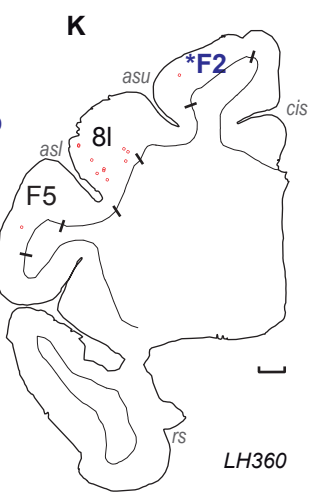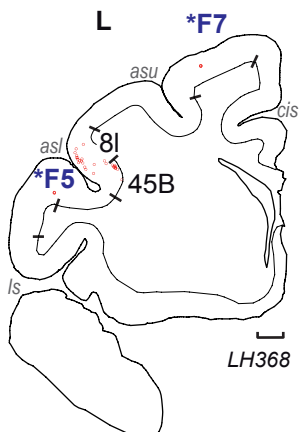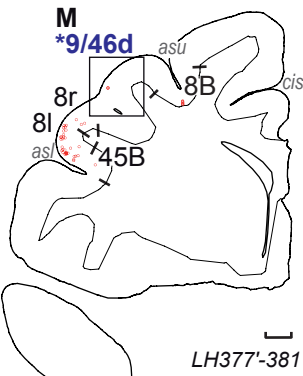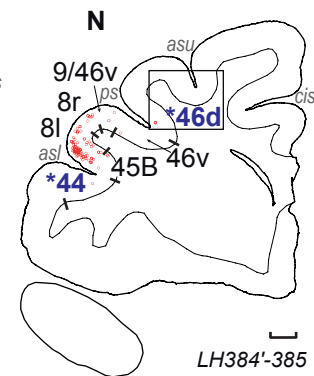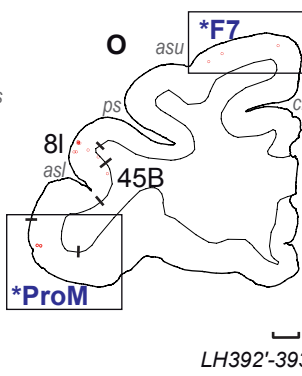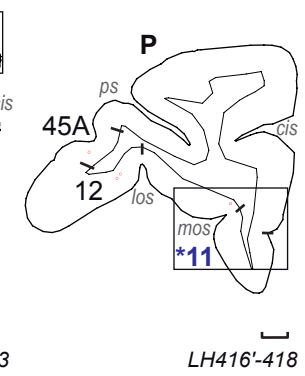



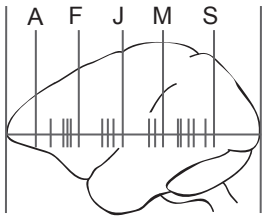

**Case 12: M106LH**

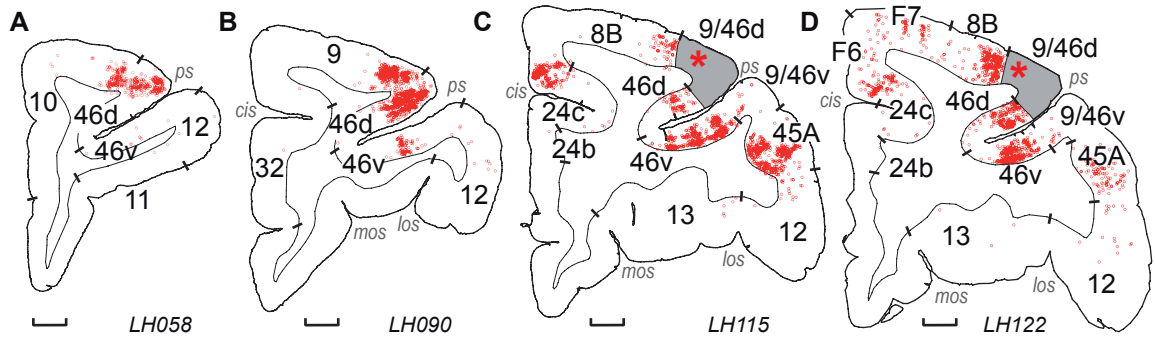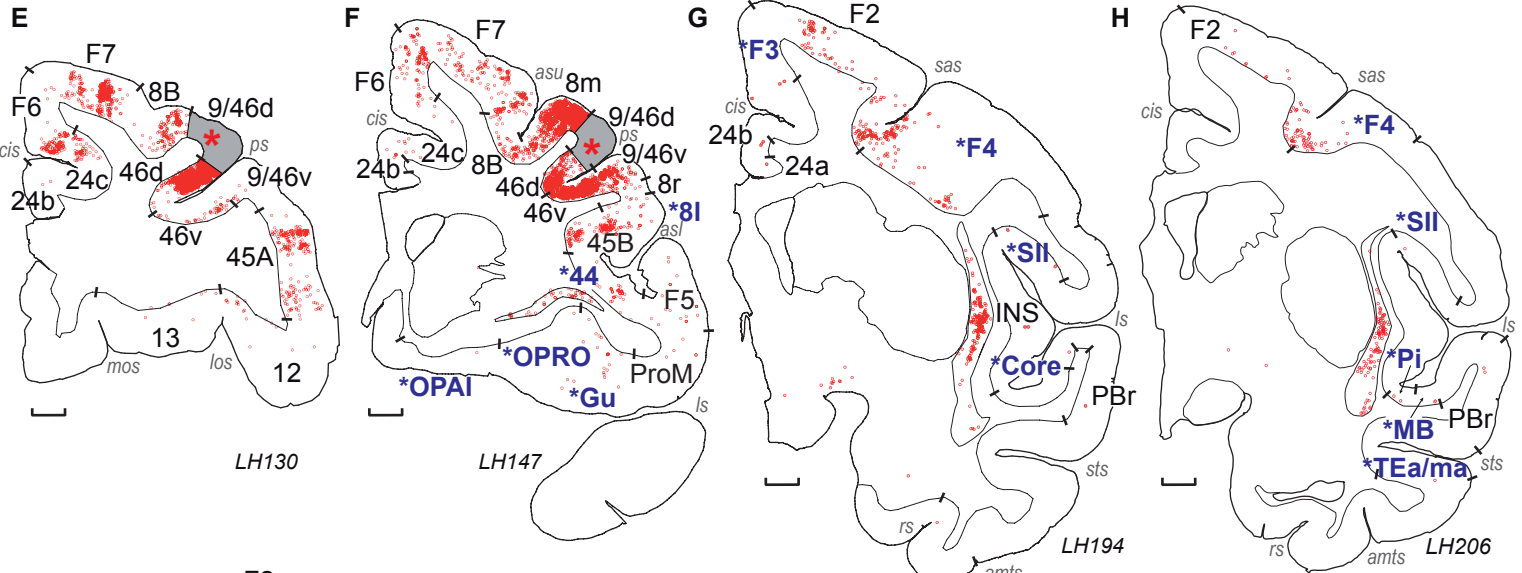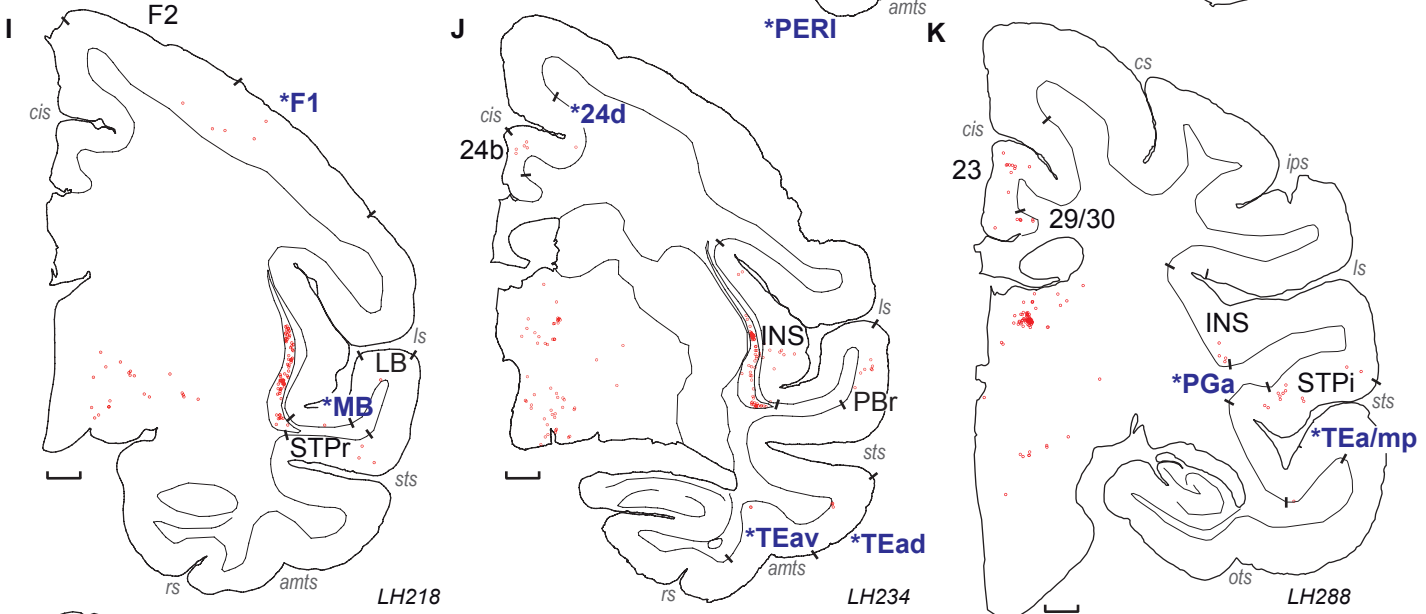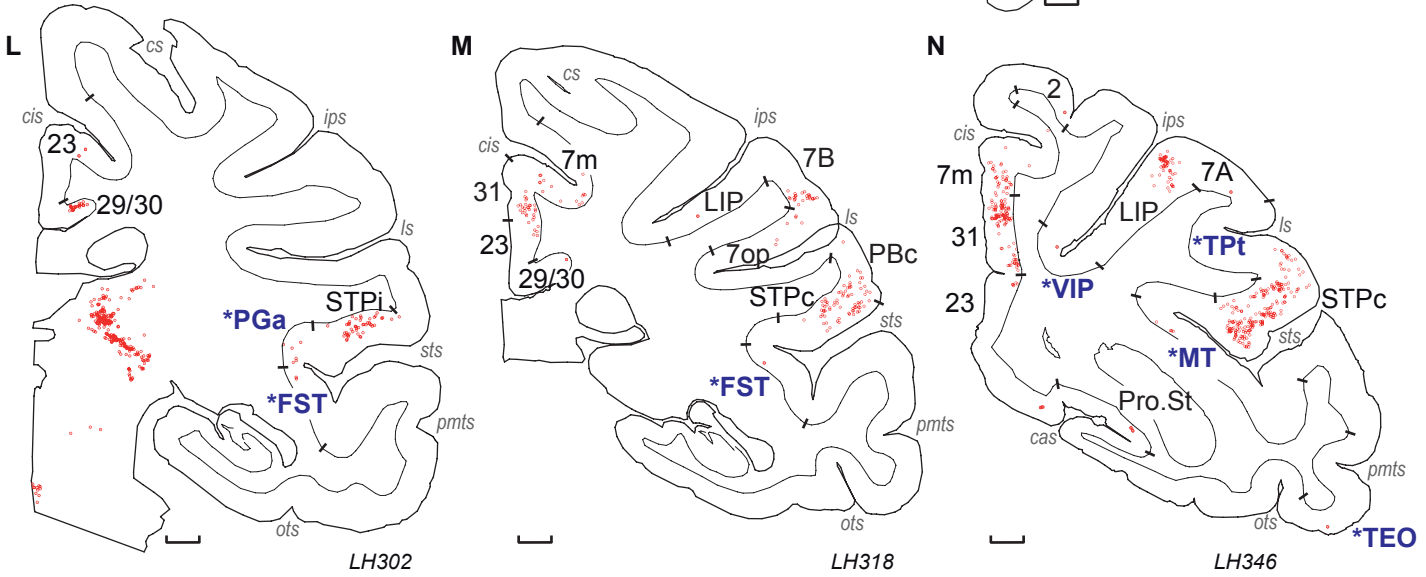

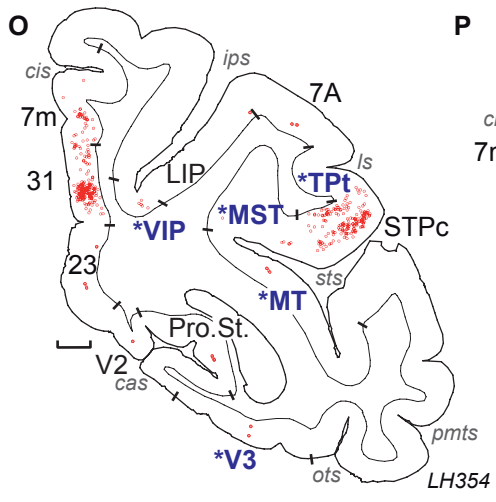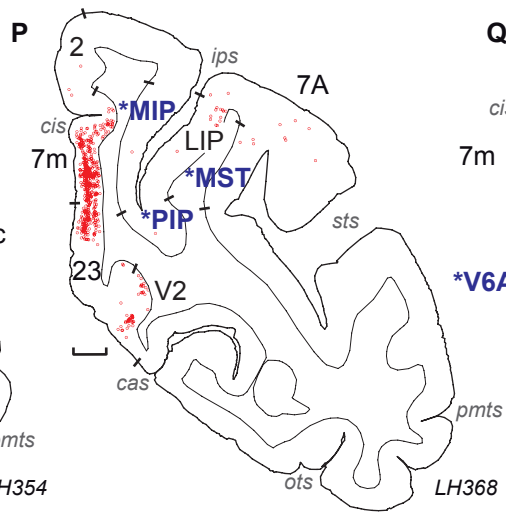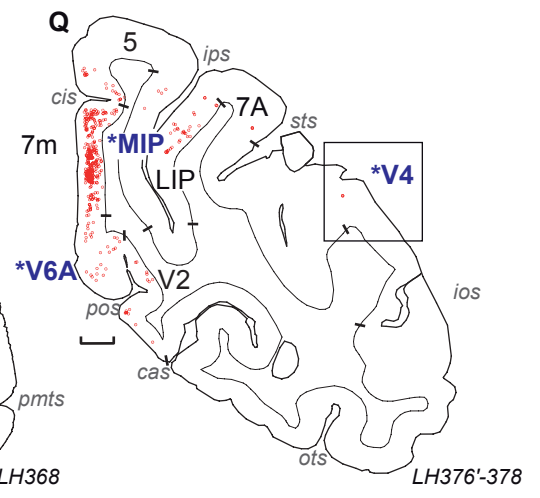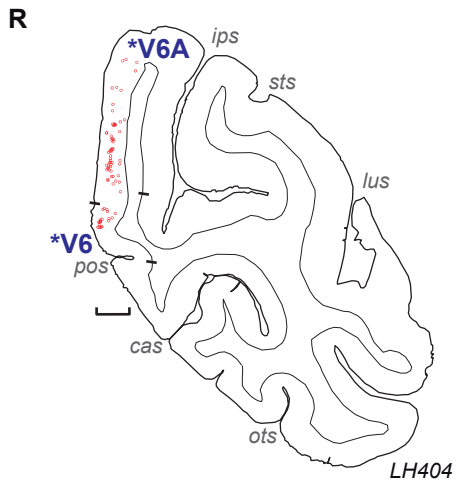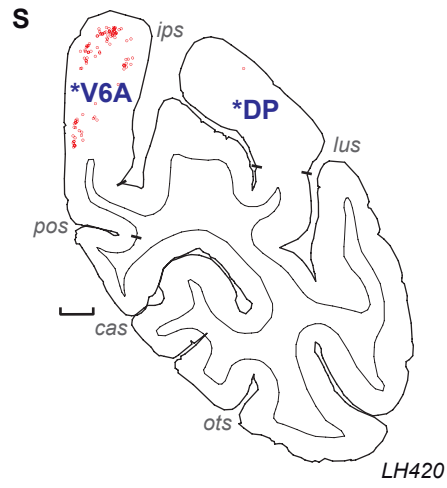

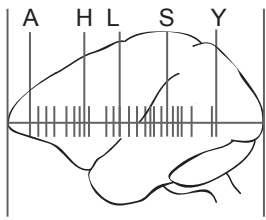

**Case 13: M106RH**

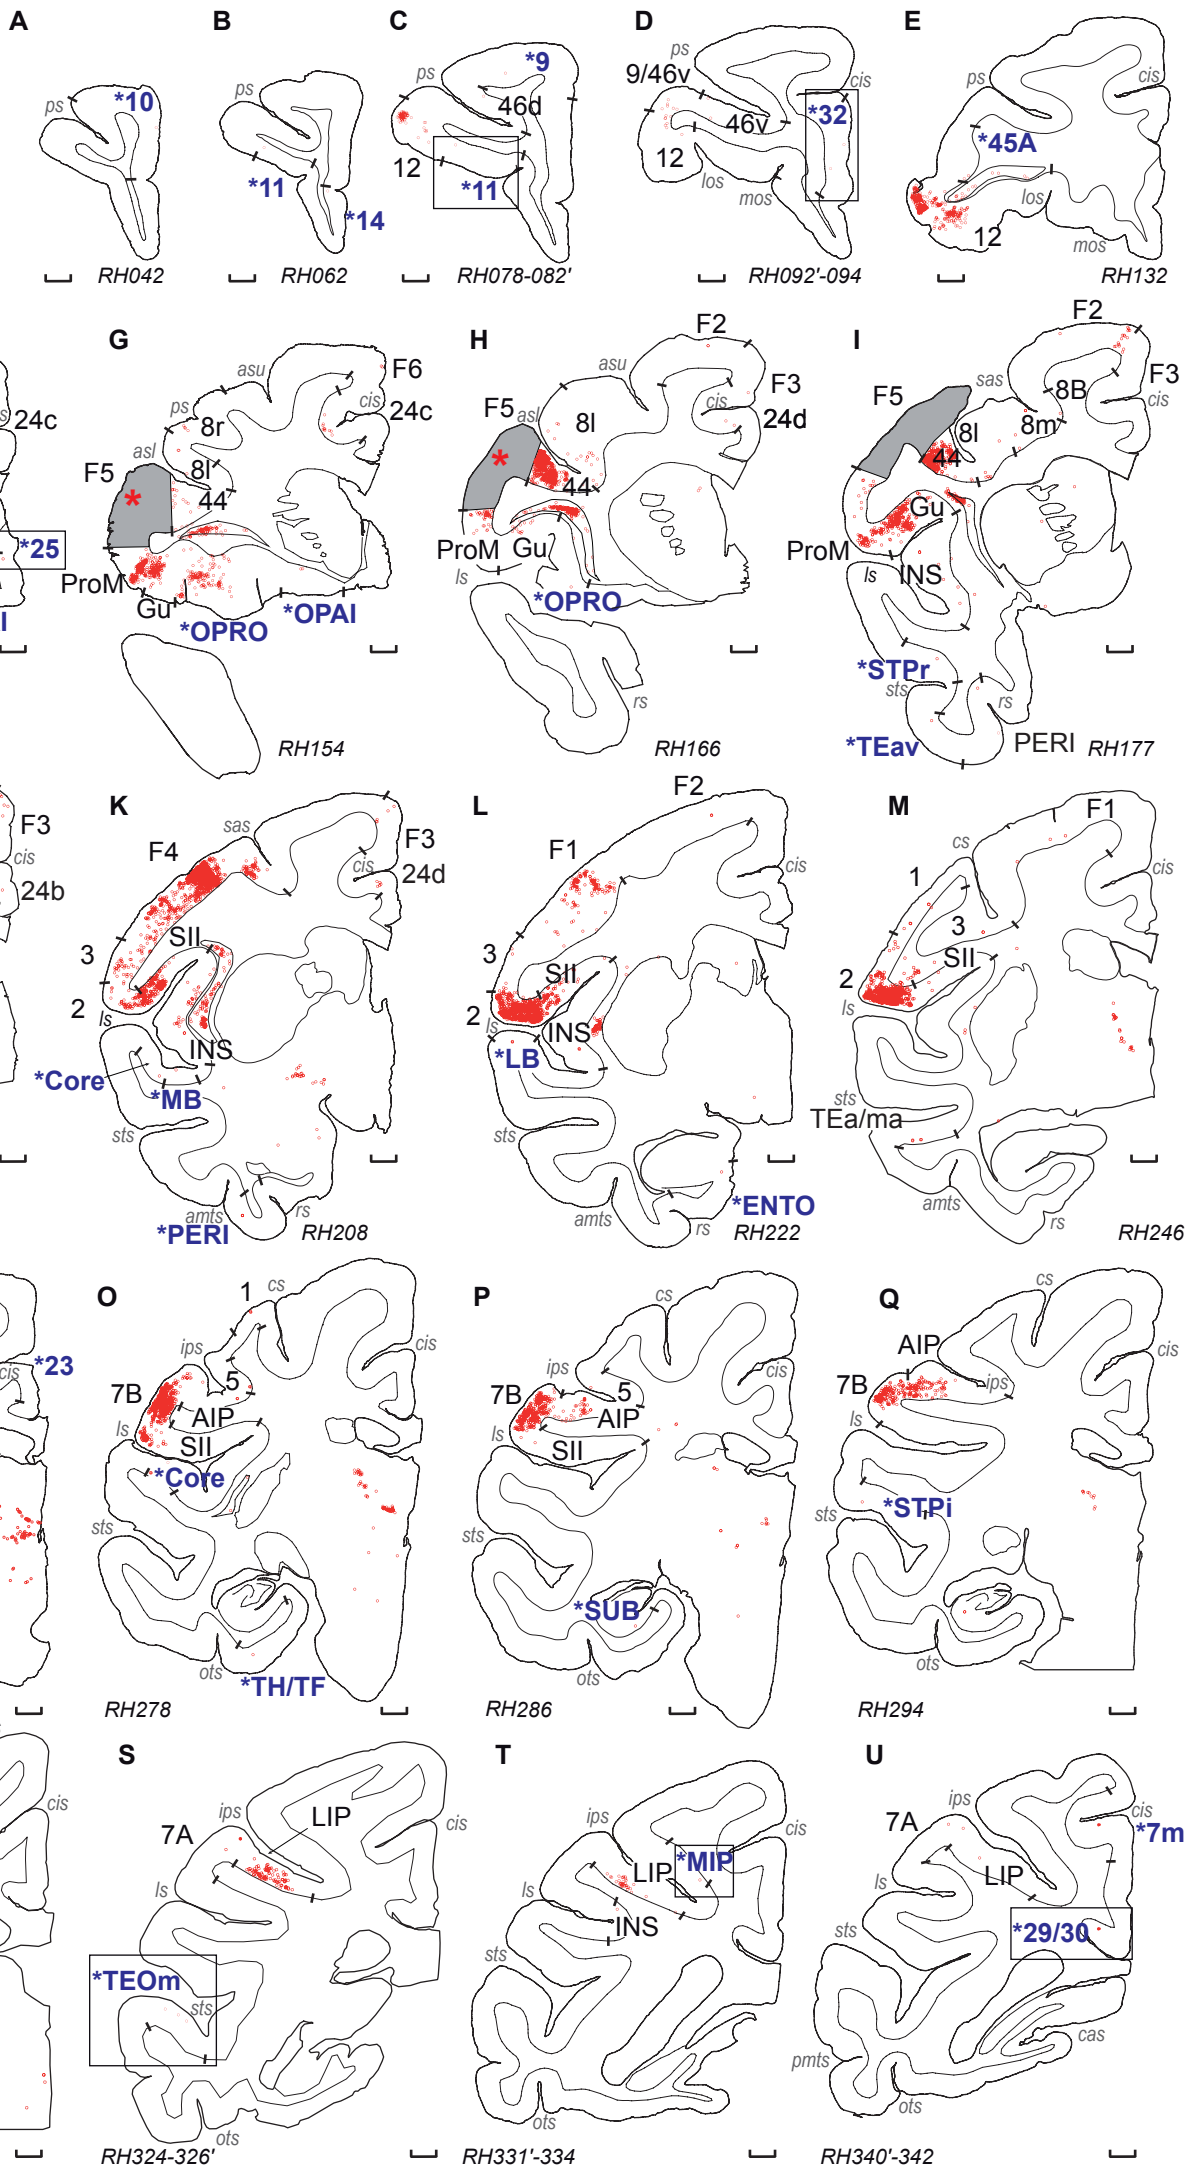



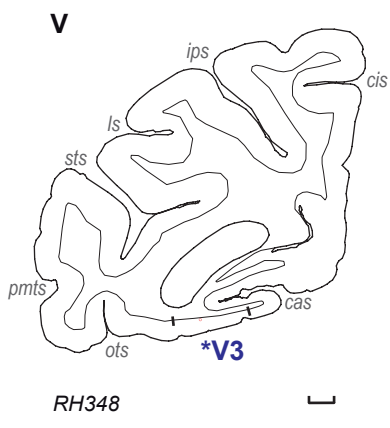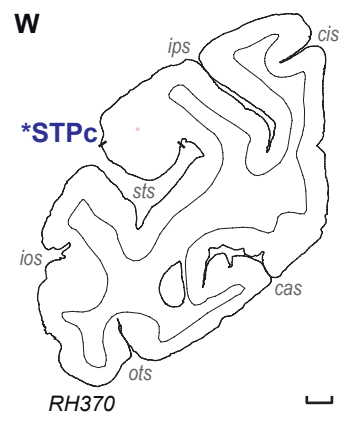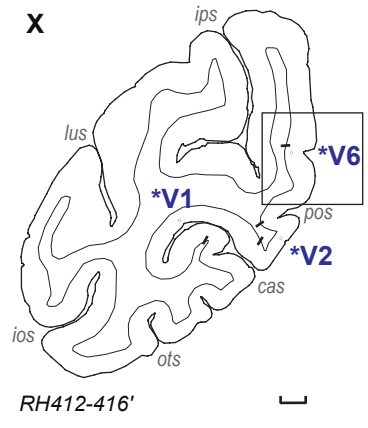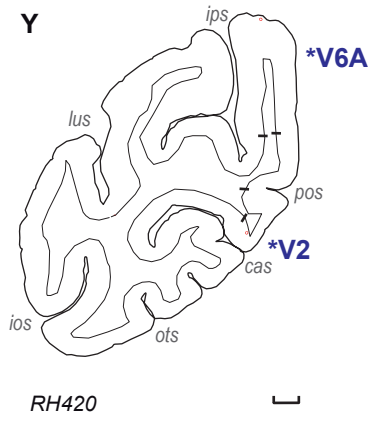



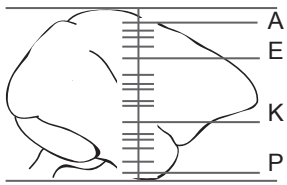

**Case 15: BB135LH**

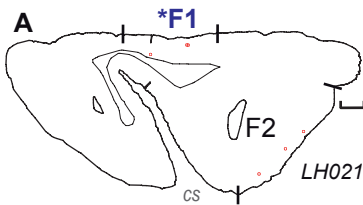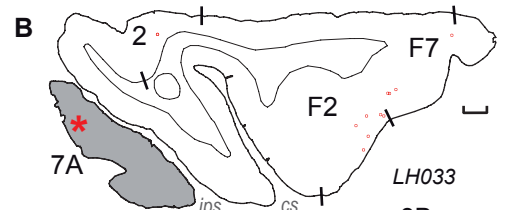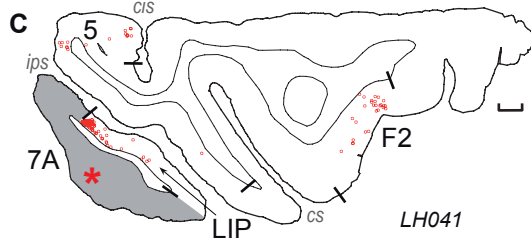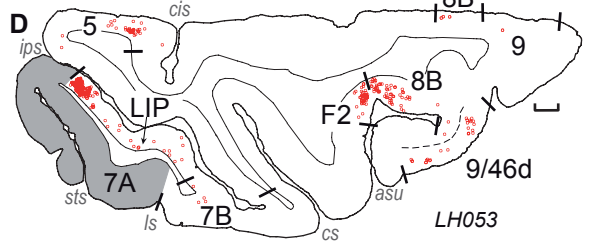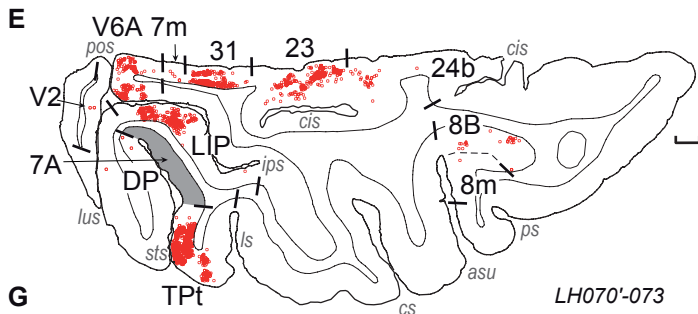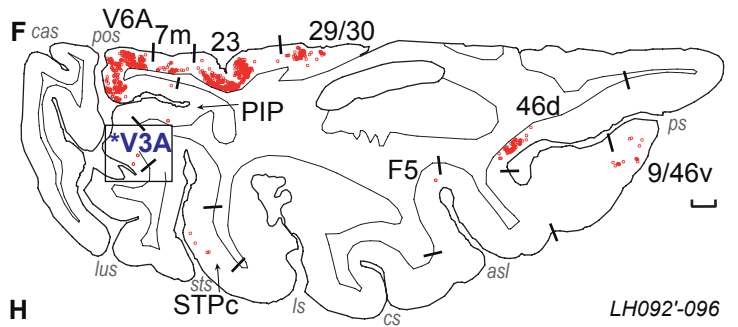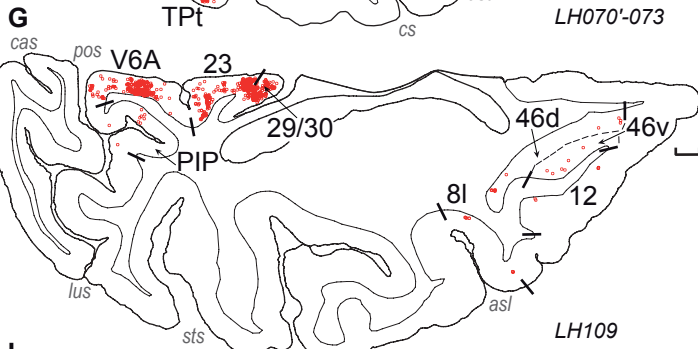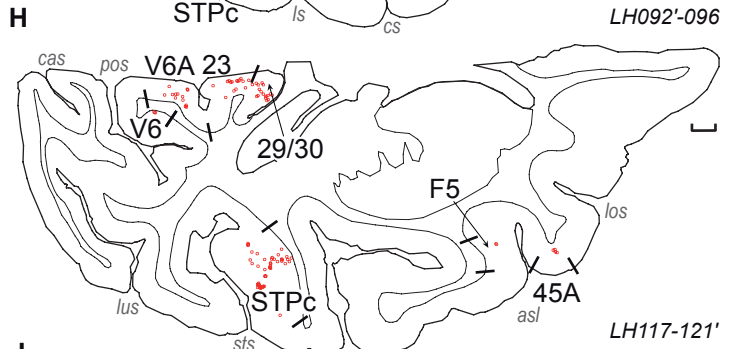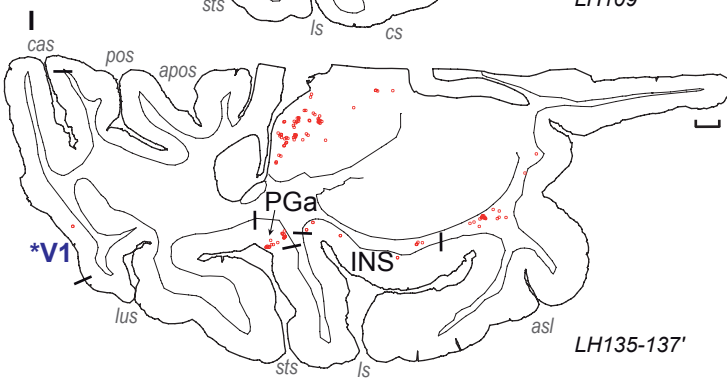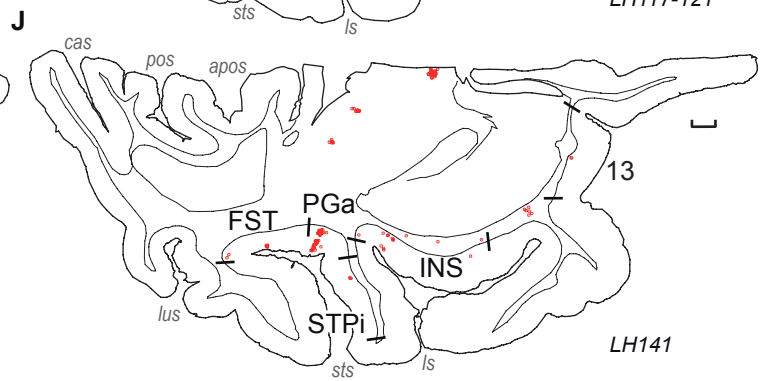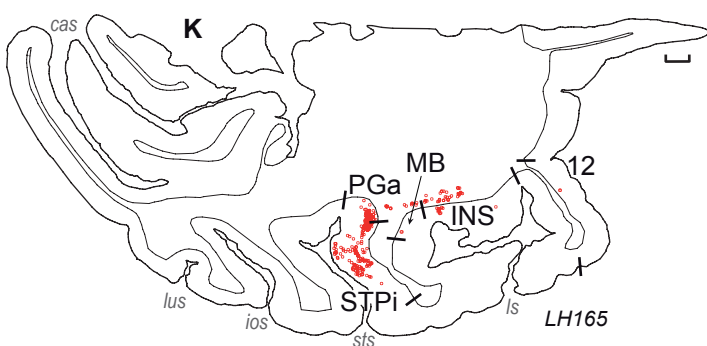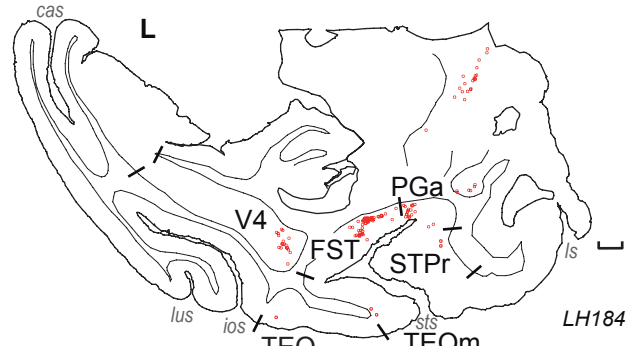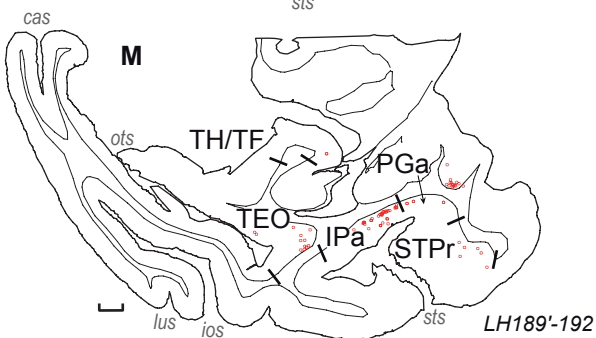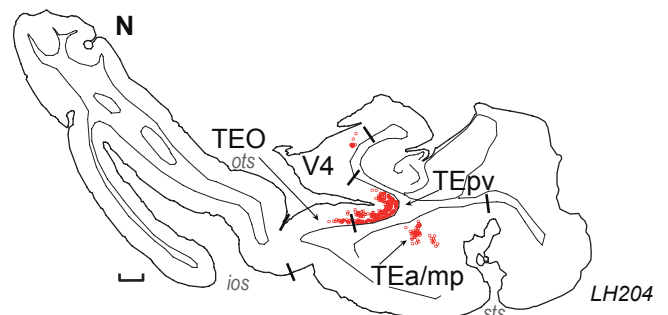

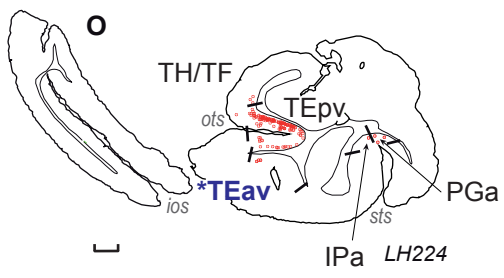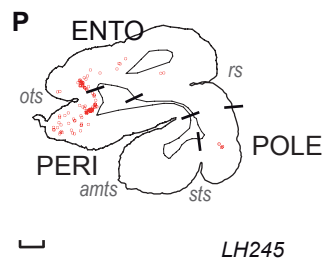

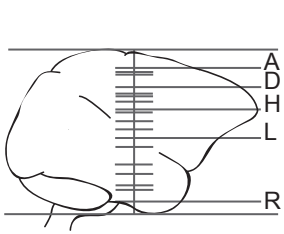

**Case 16: M089LH**

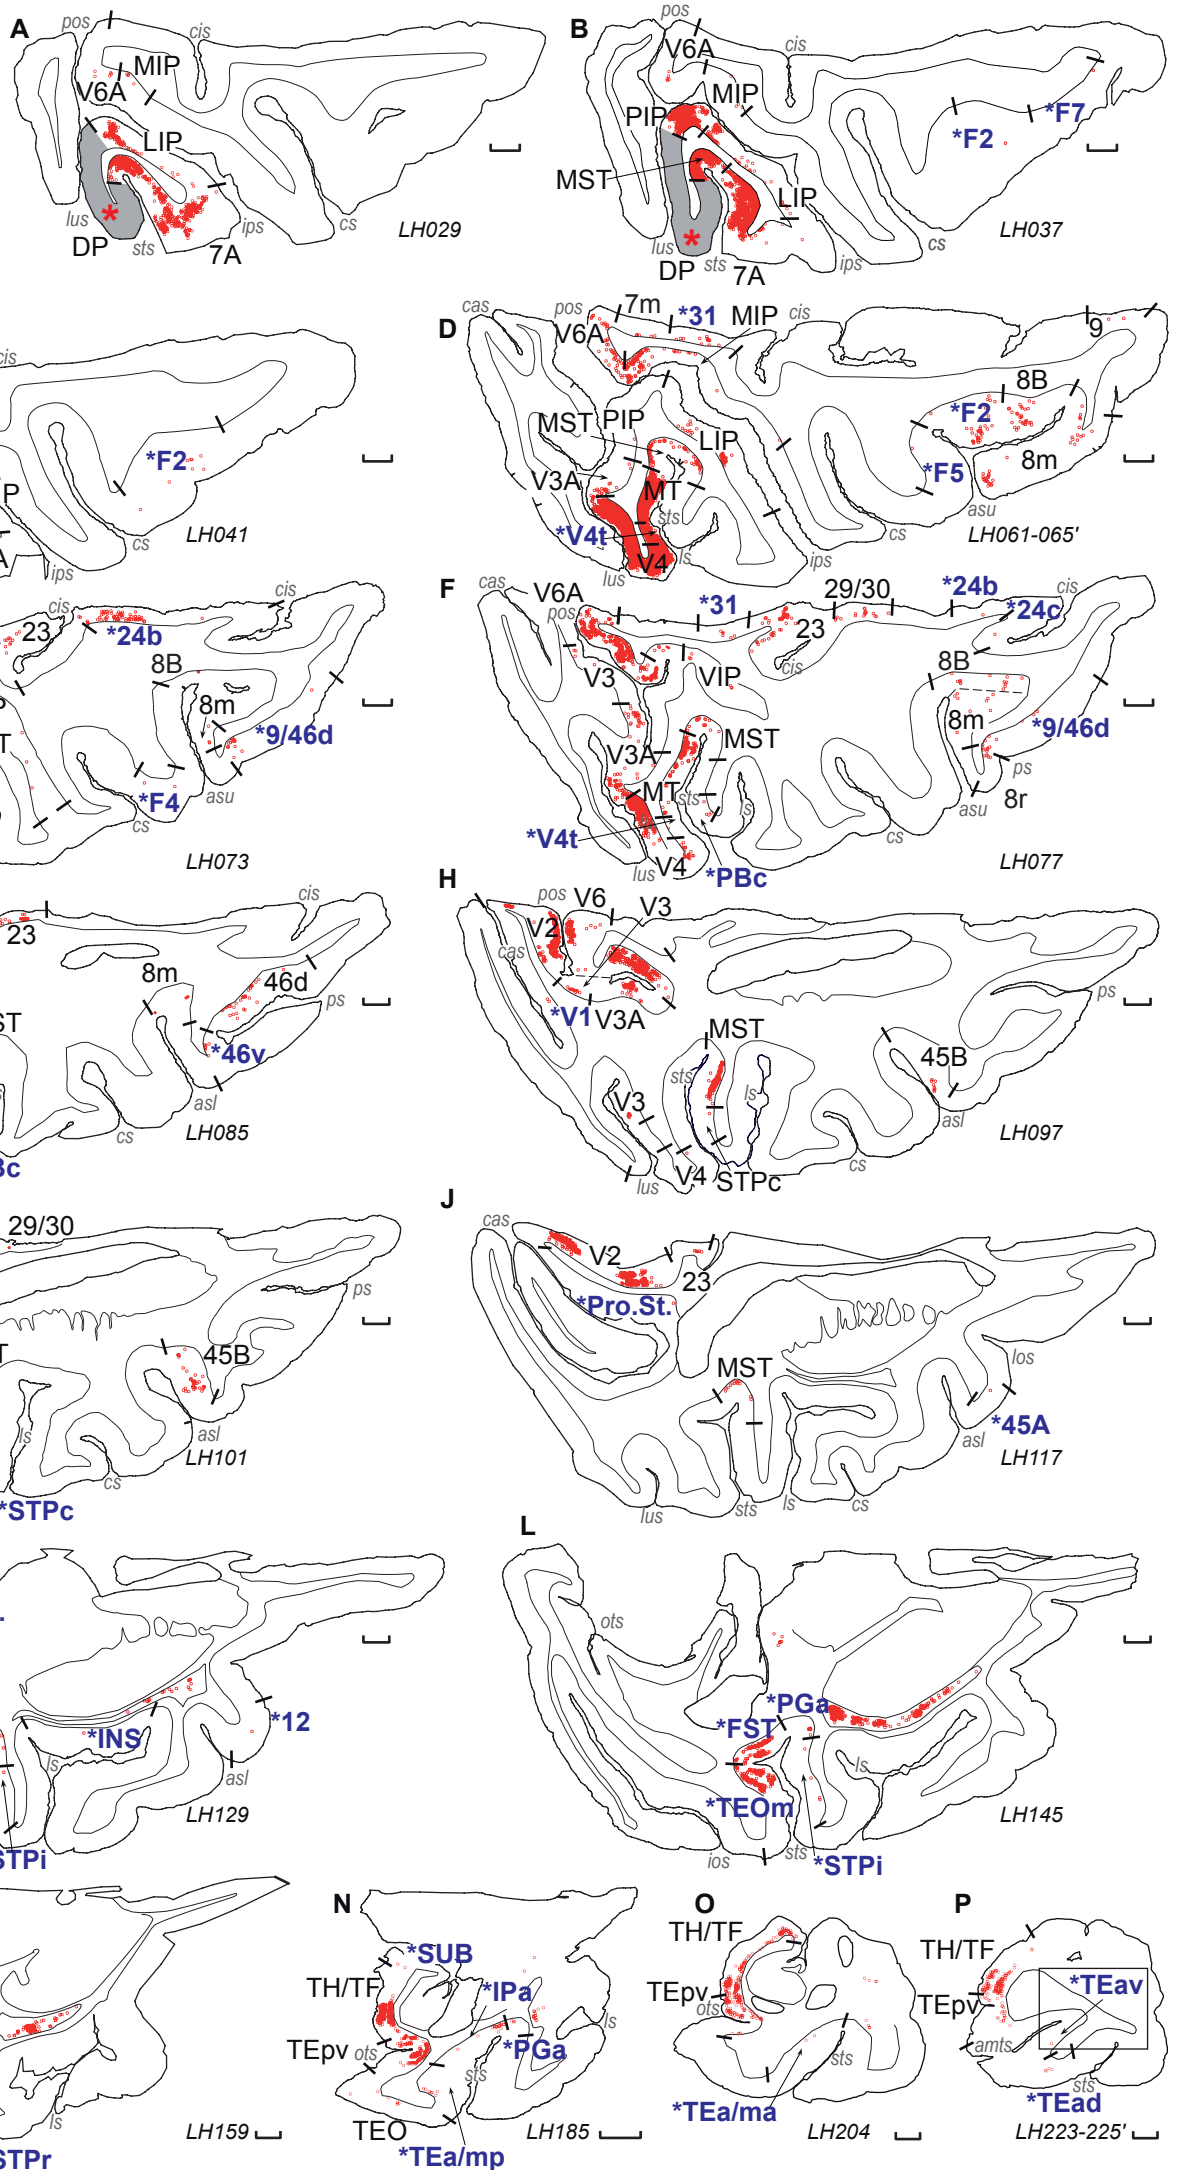

Q

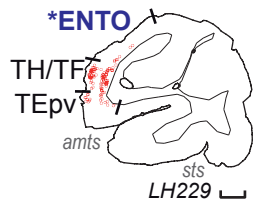

R

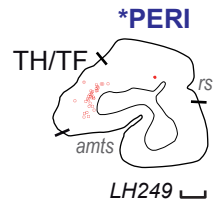



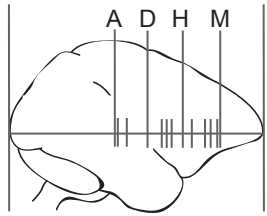

**Case 17: M098LH**

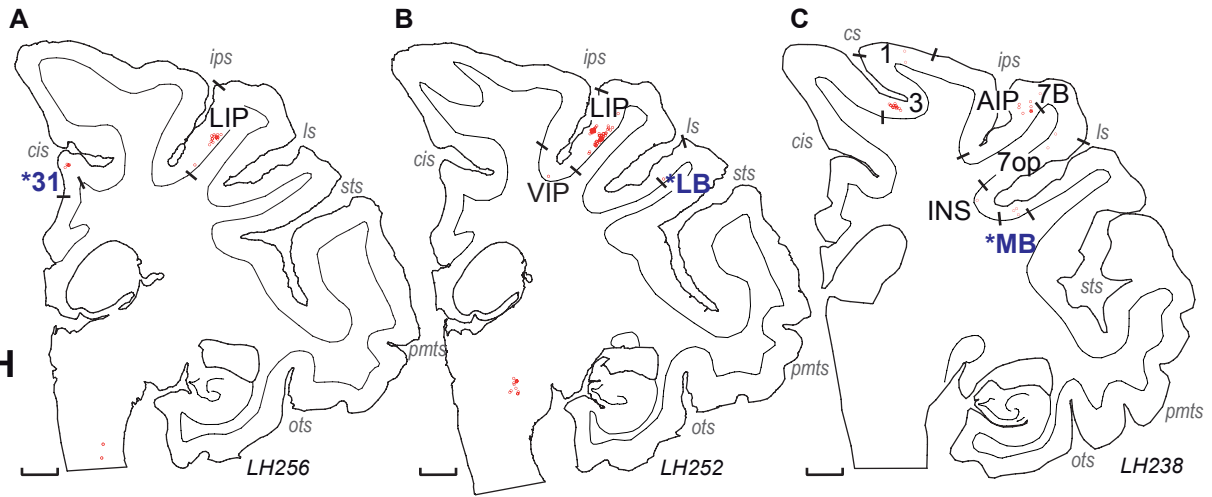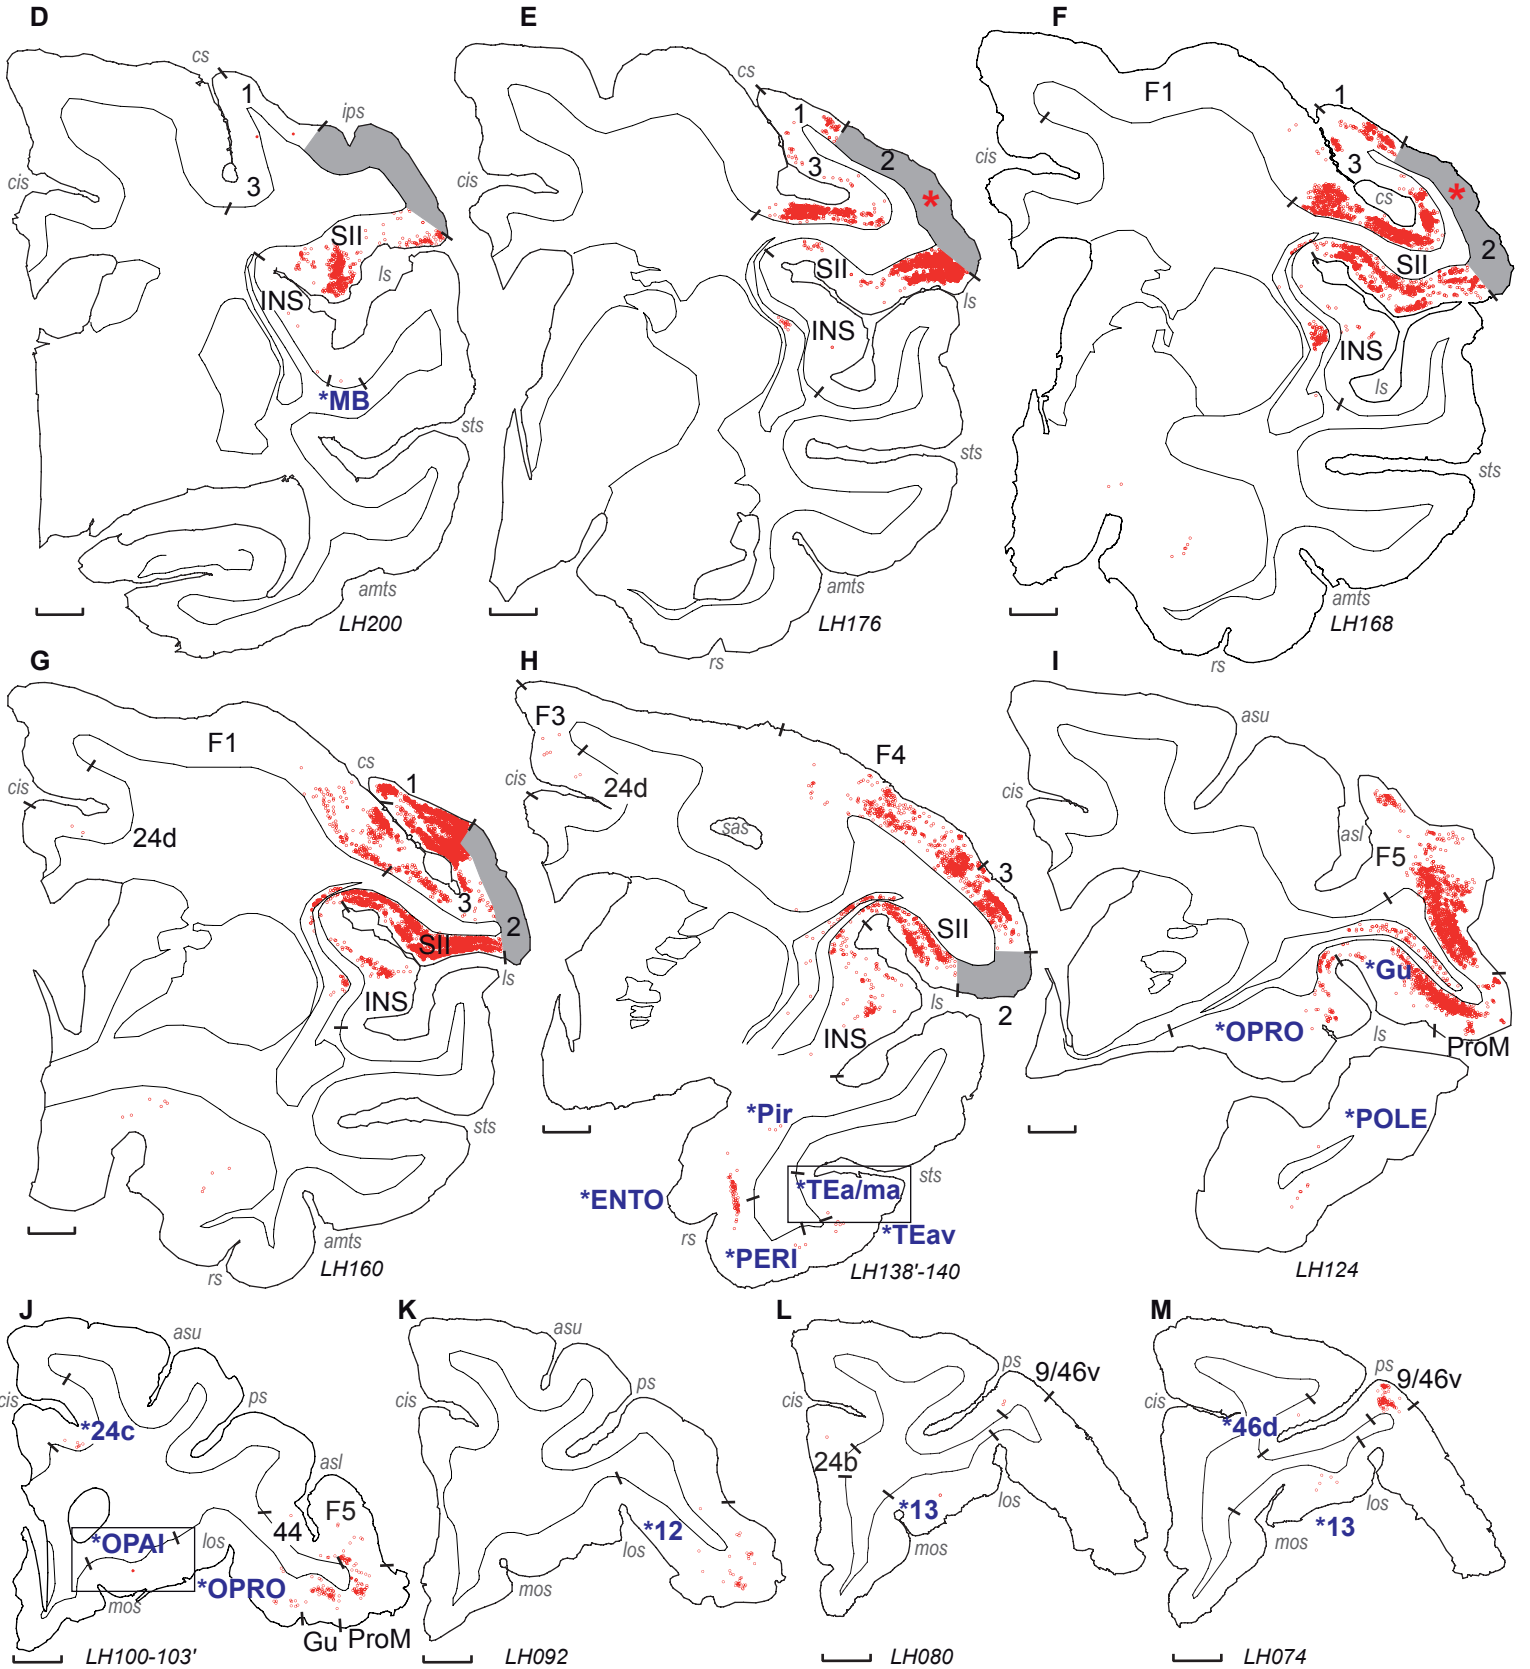

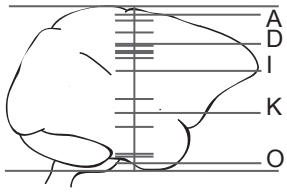

**Case 18: M070LH**

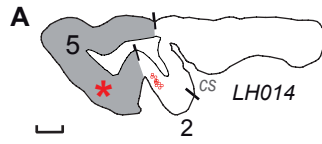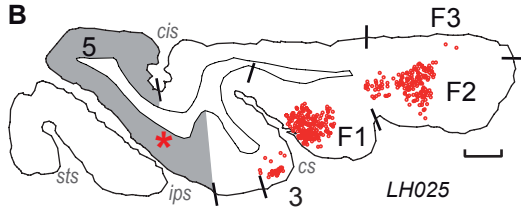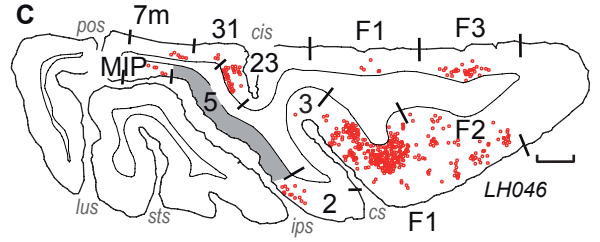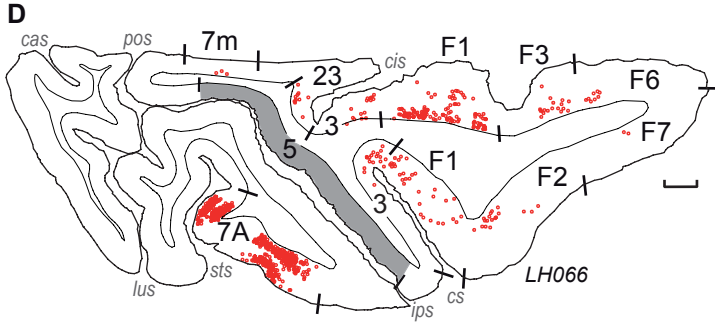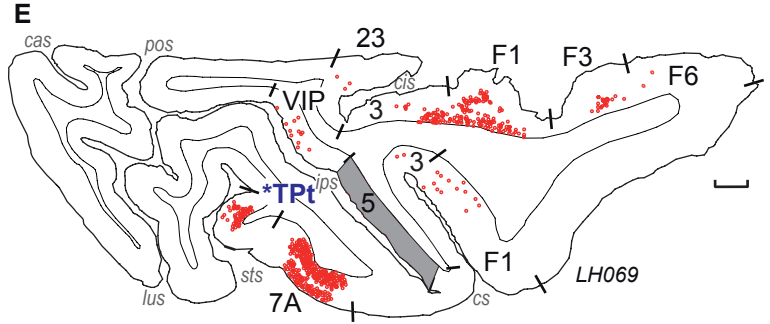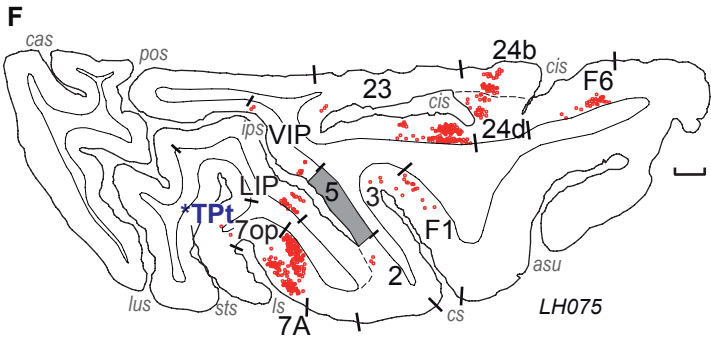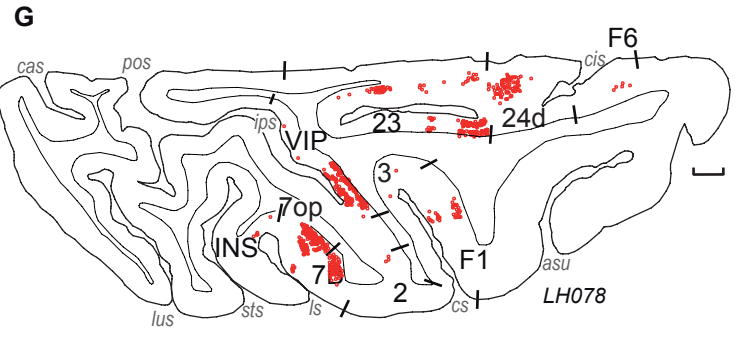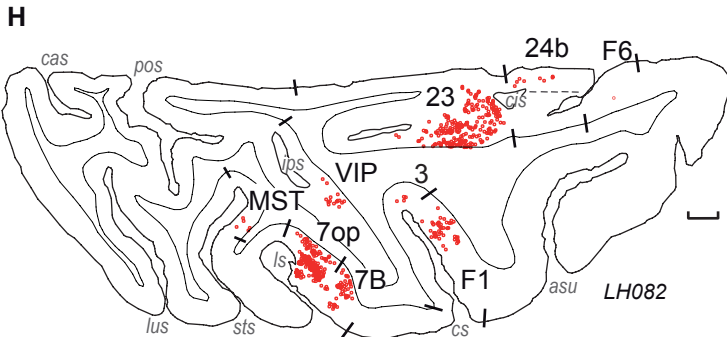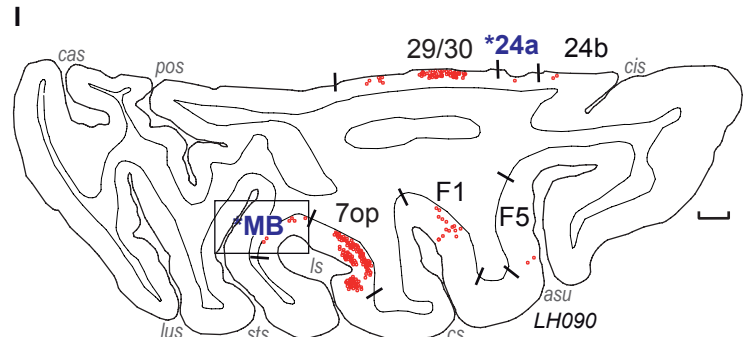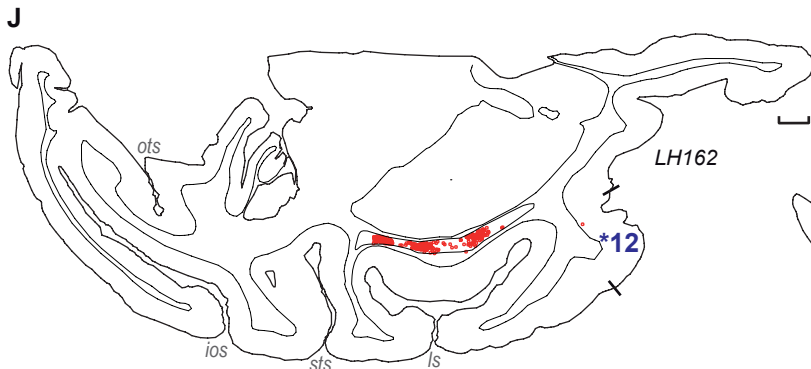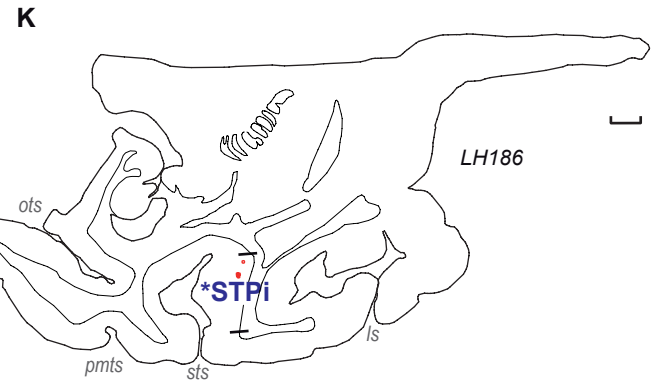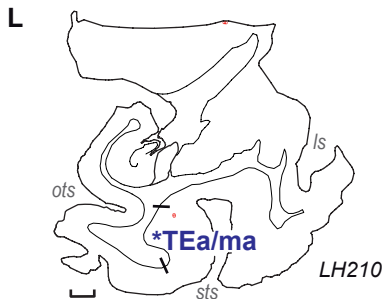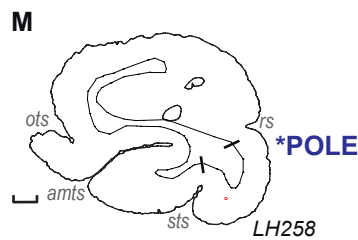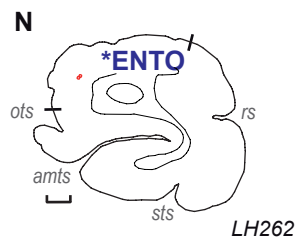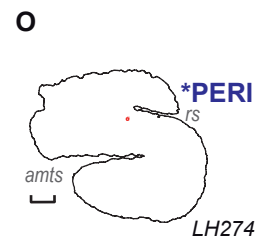



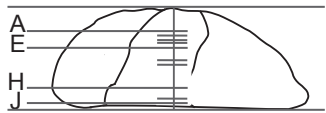

**Case 19: M068LH**

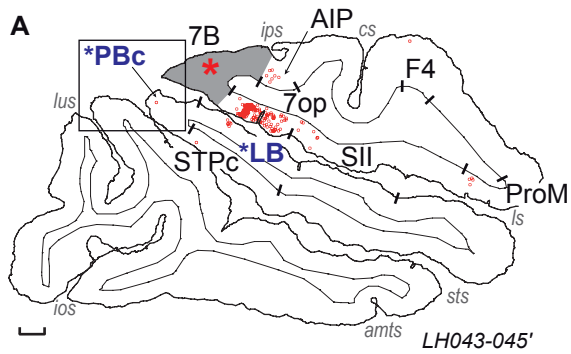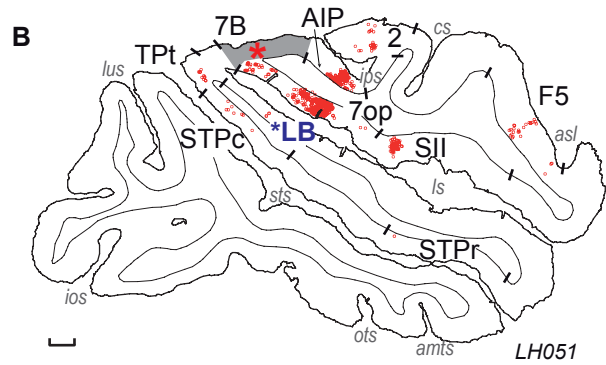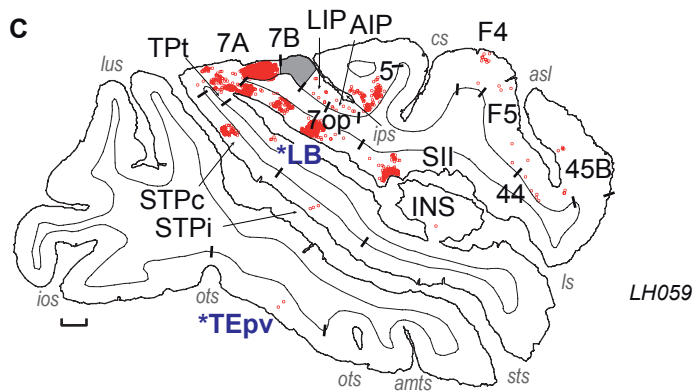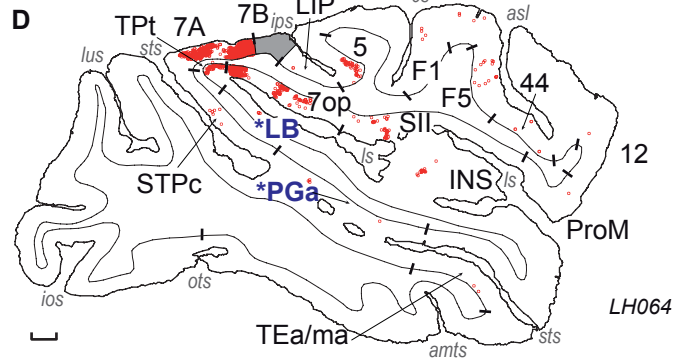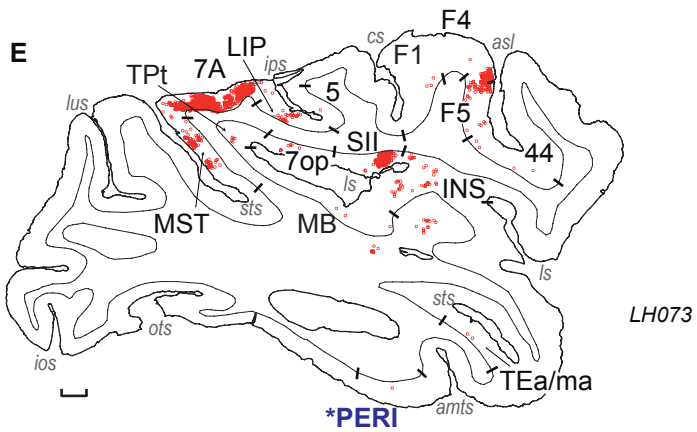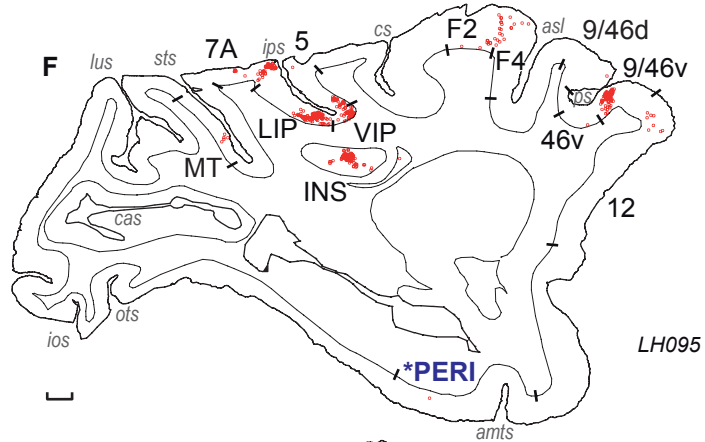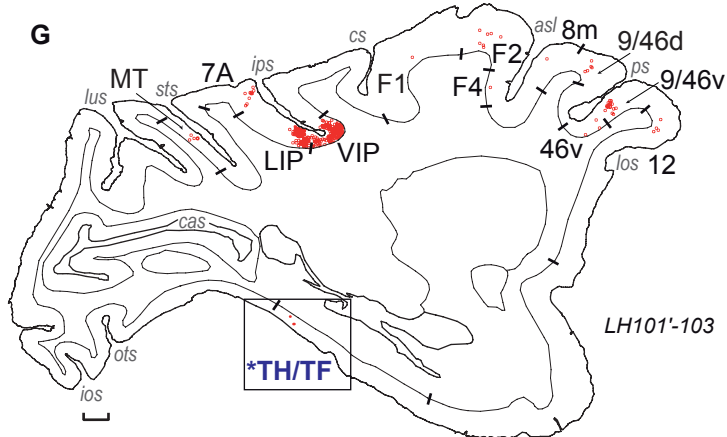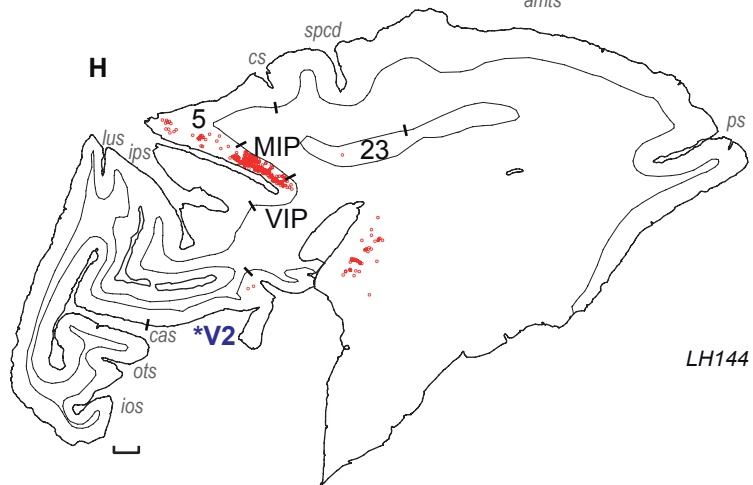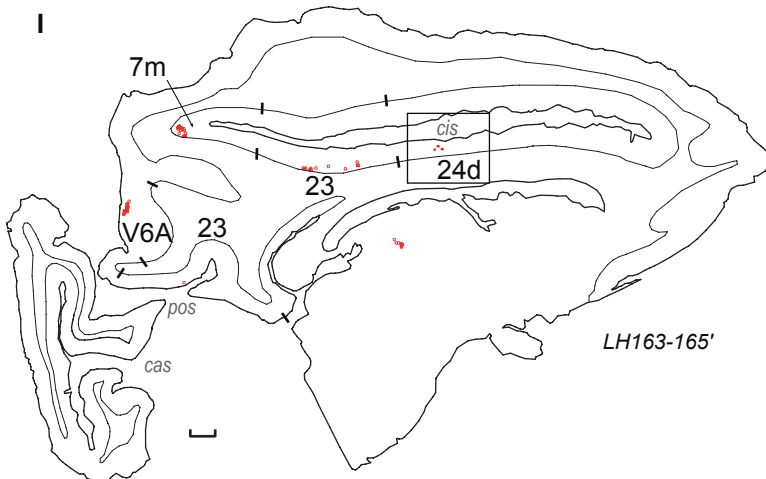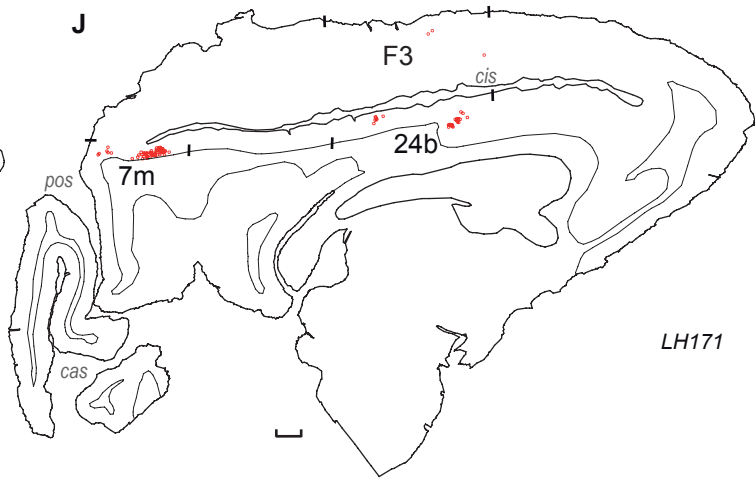

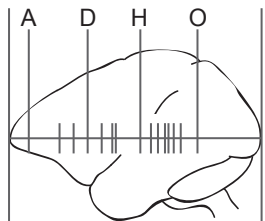

**Case 20: BB289LH**

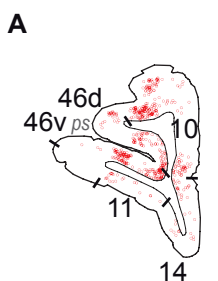

LH045

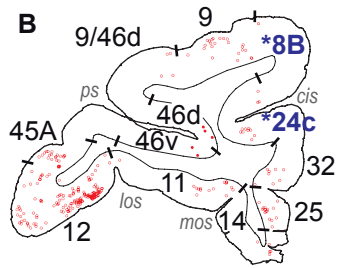

LH115

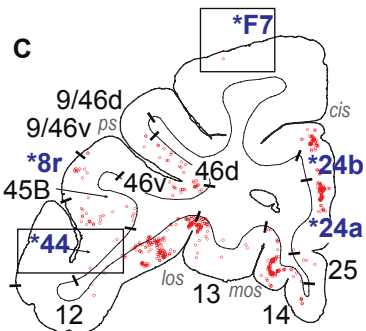

LH147-151'

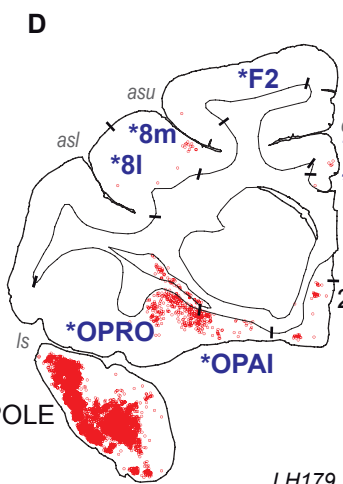

LH179

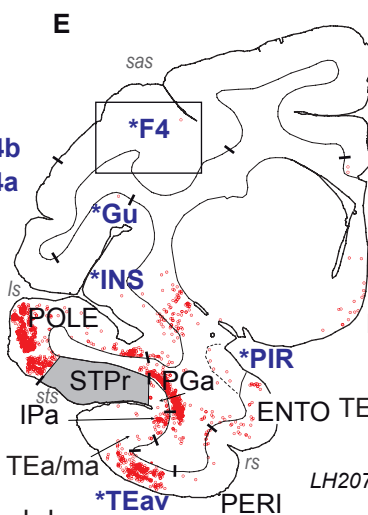

LH207'-211

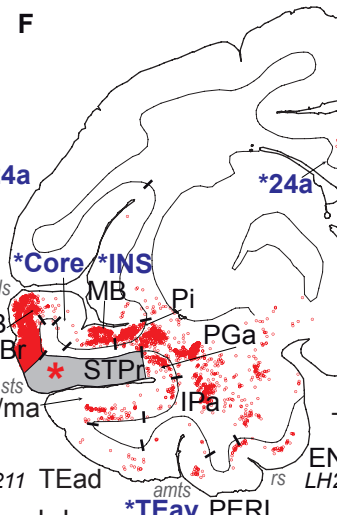

LH235

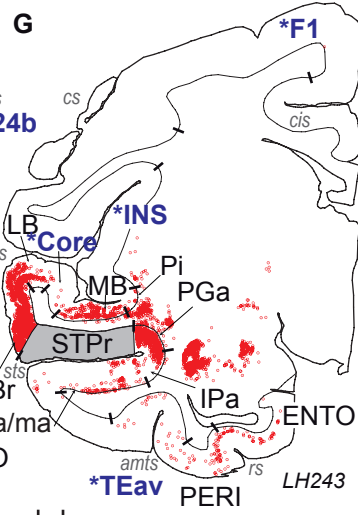

LH243

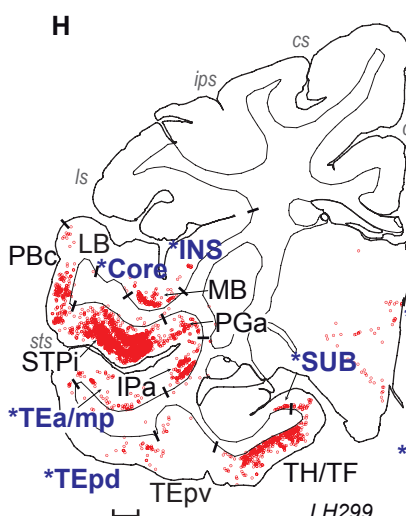

LH299

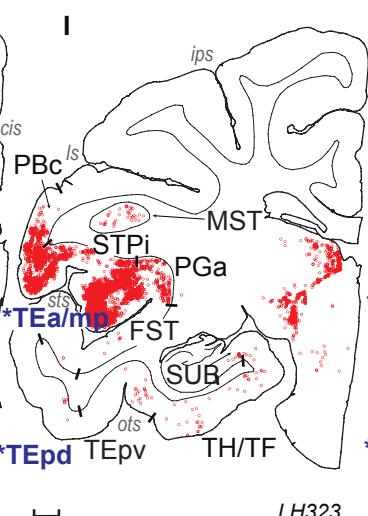

LH323

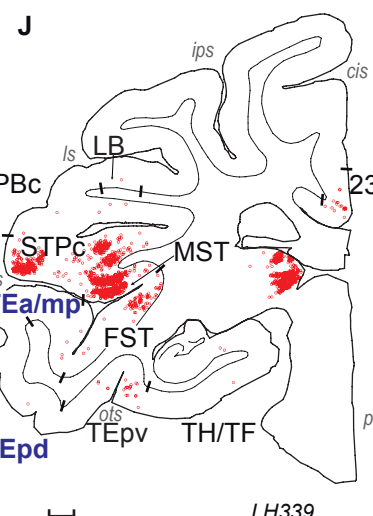

LH339

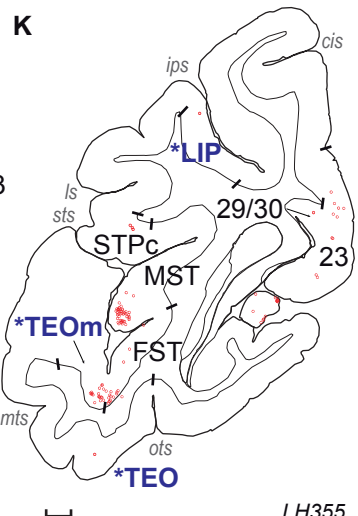

LH355

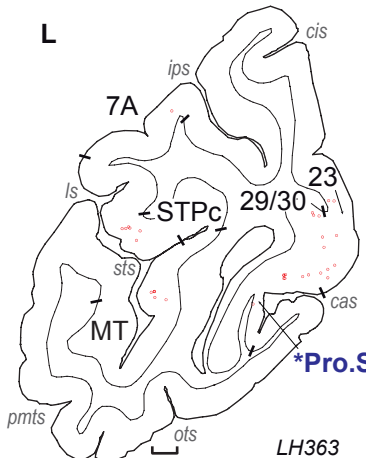

LH363

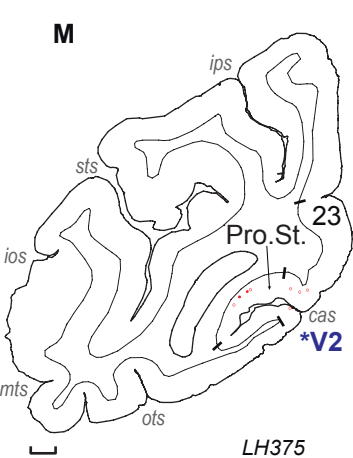

LH375

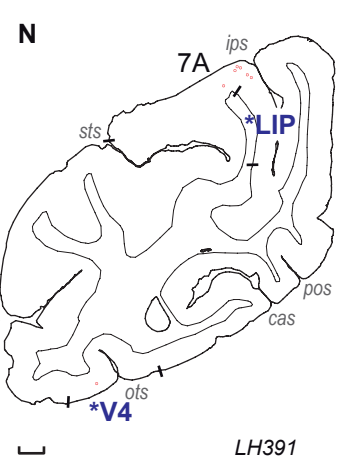

LH391

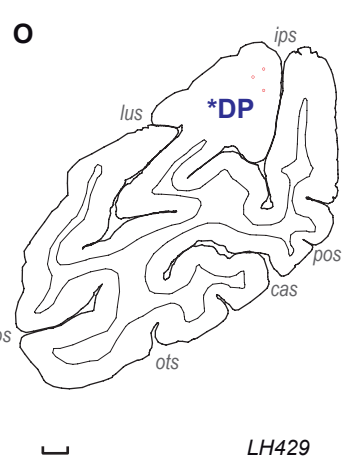

LH429

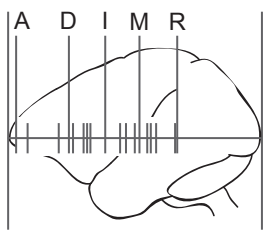

**Case 21: BB289LH**

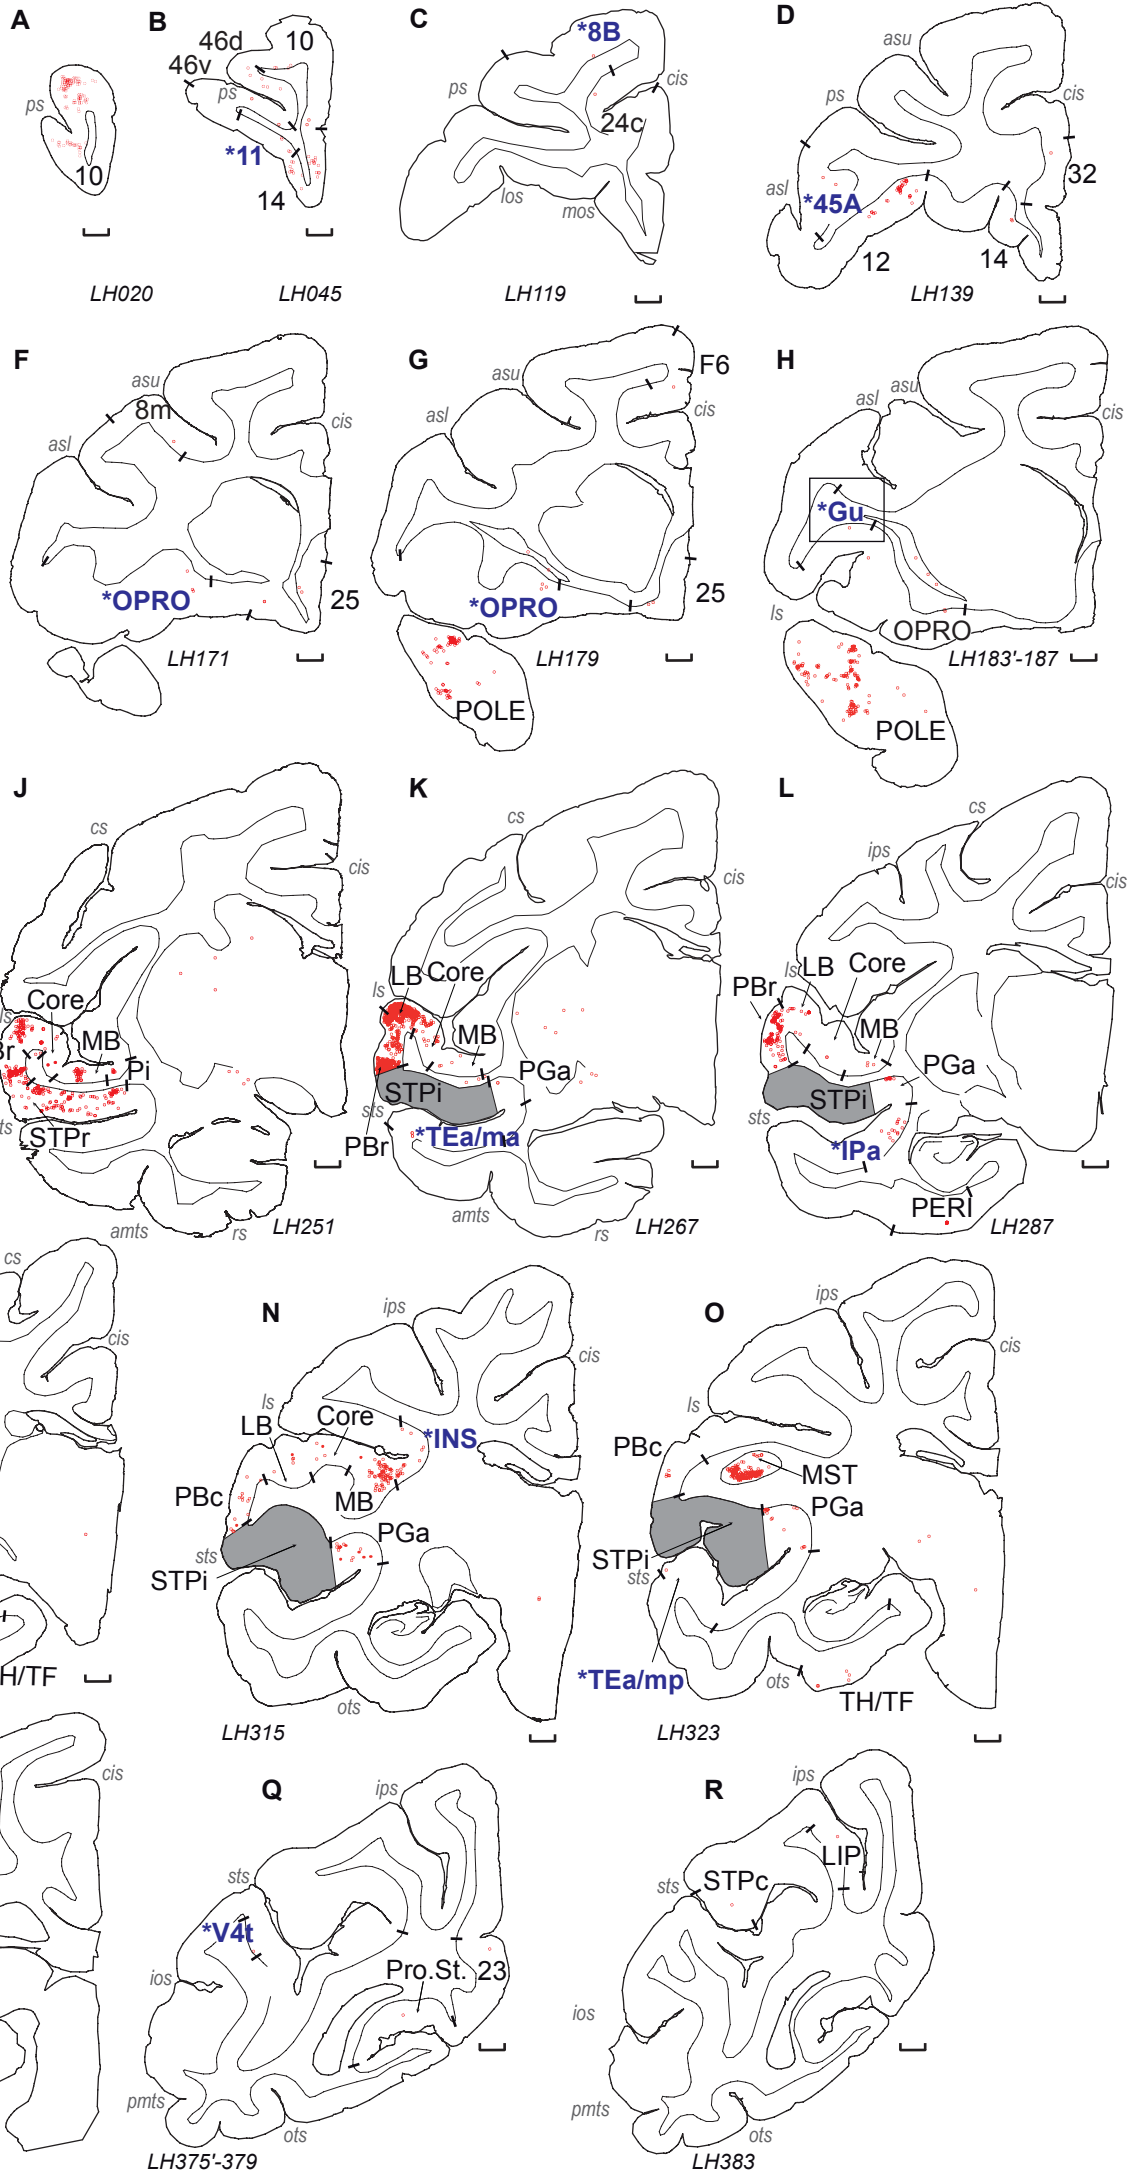



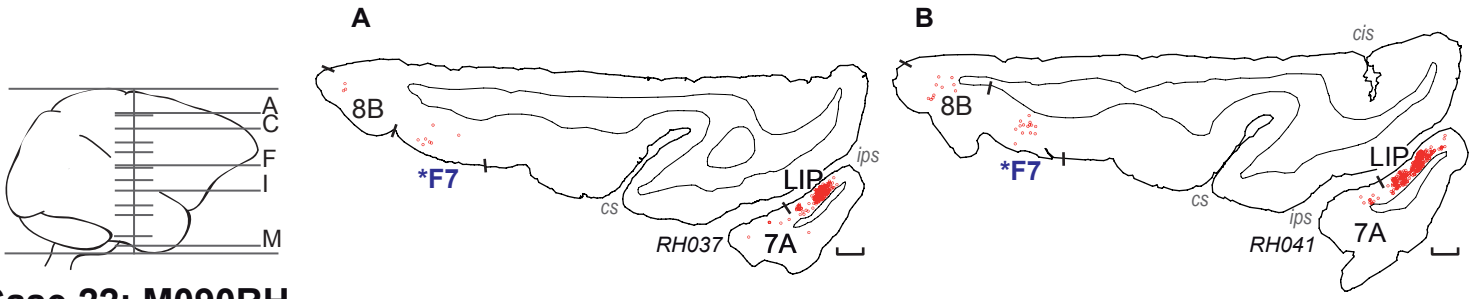

**Case 22: M090RH**

L

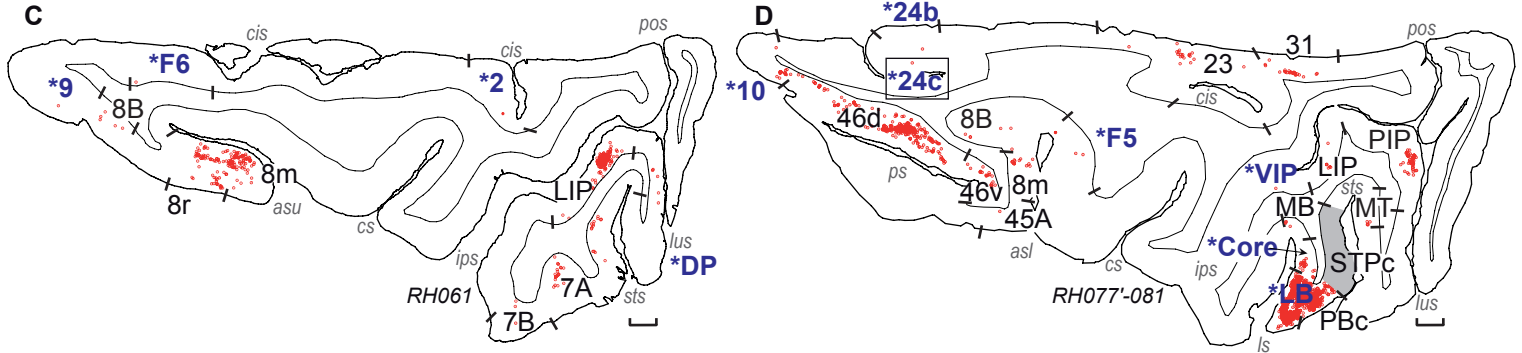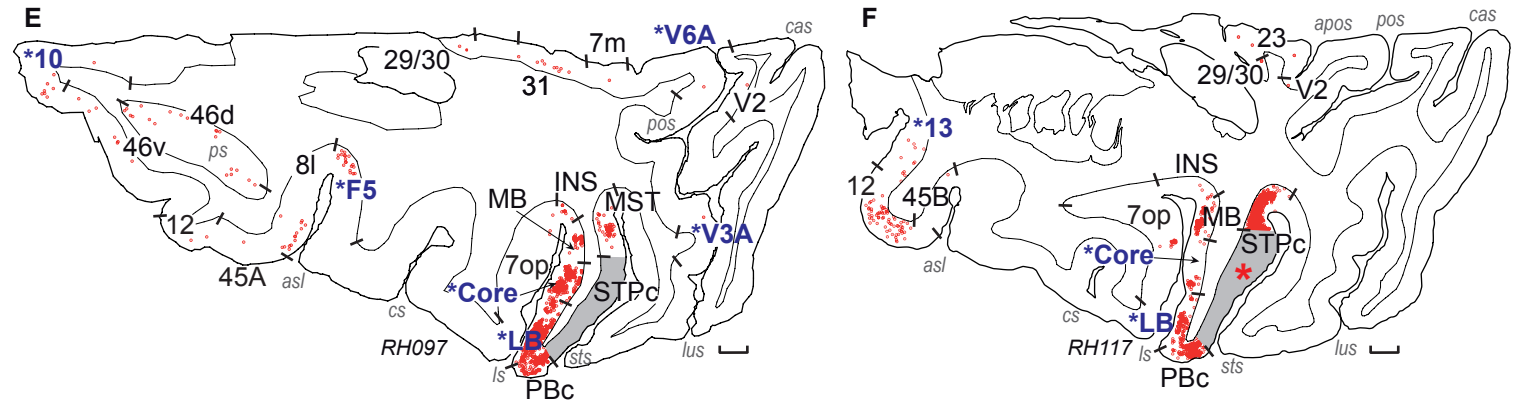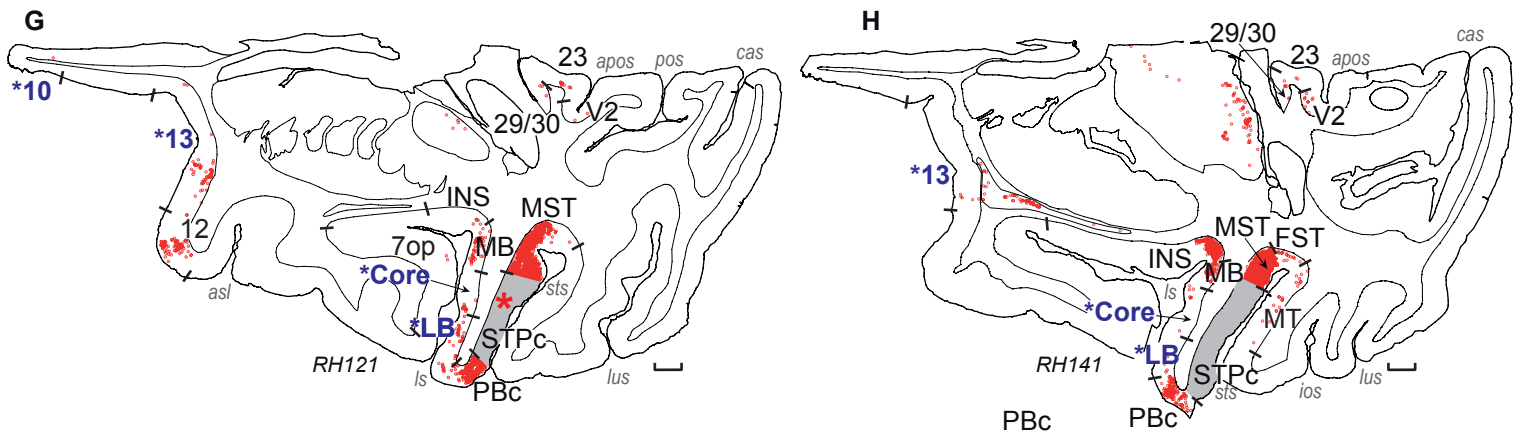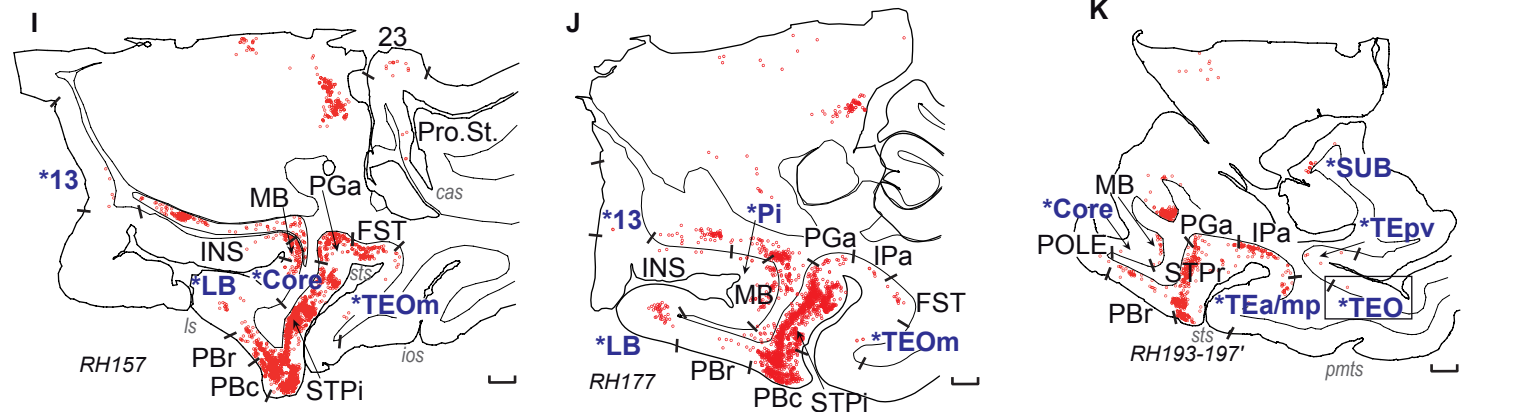

L

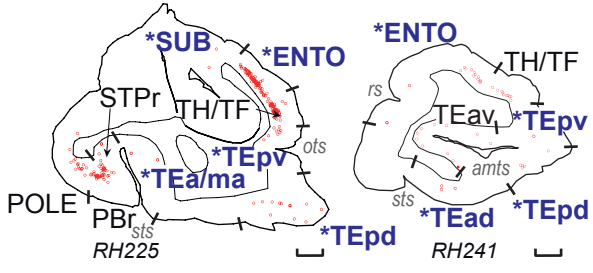

M

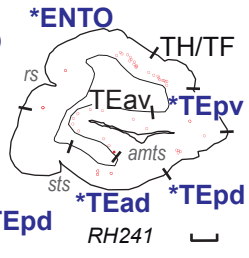

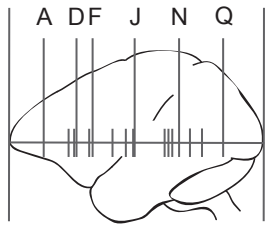

**Case 23: M108LH**

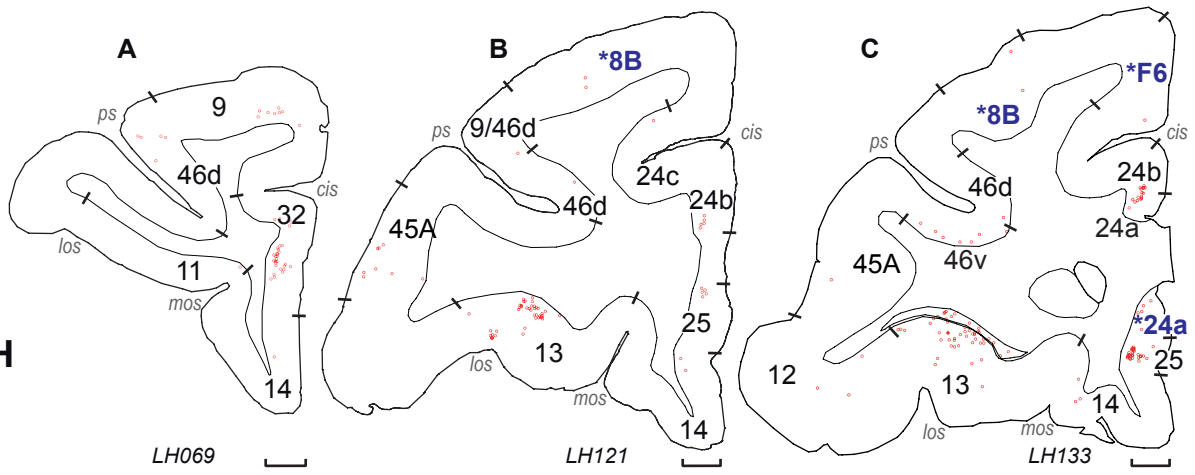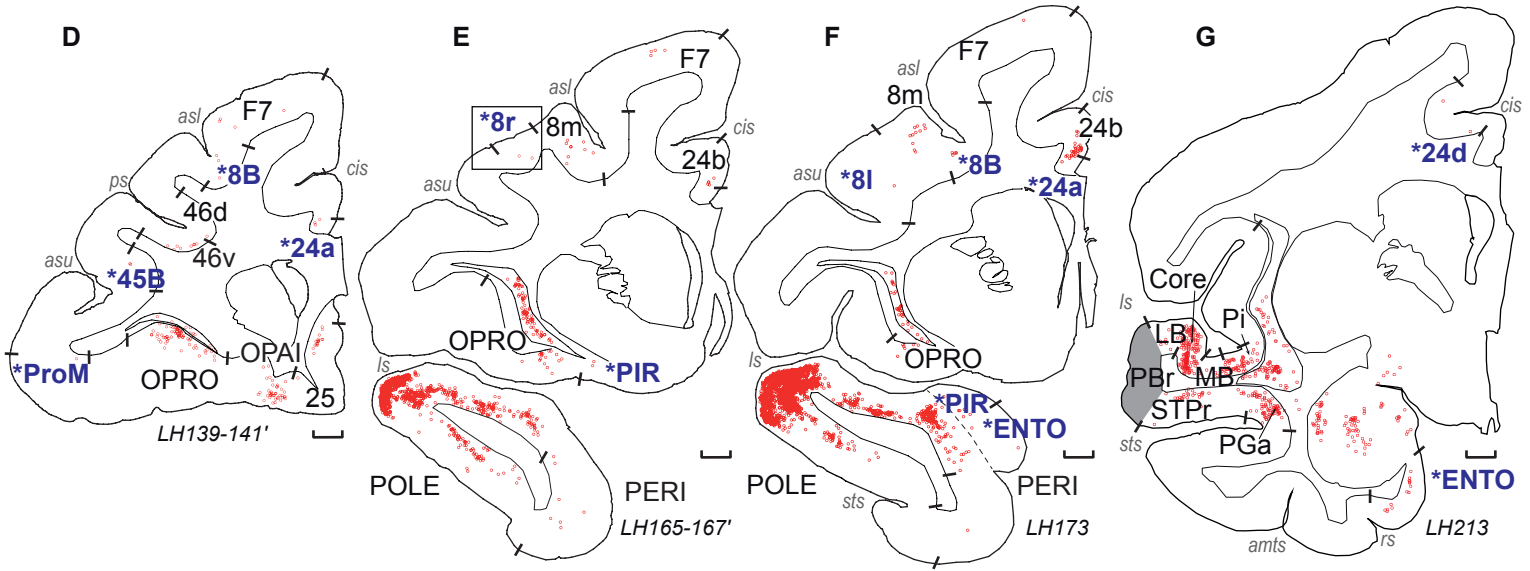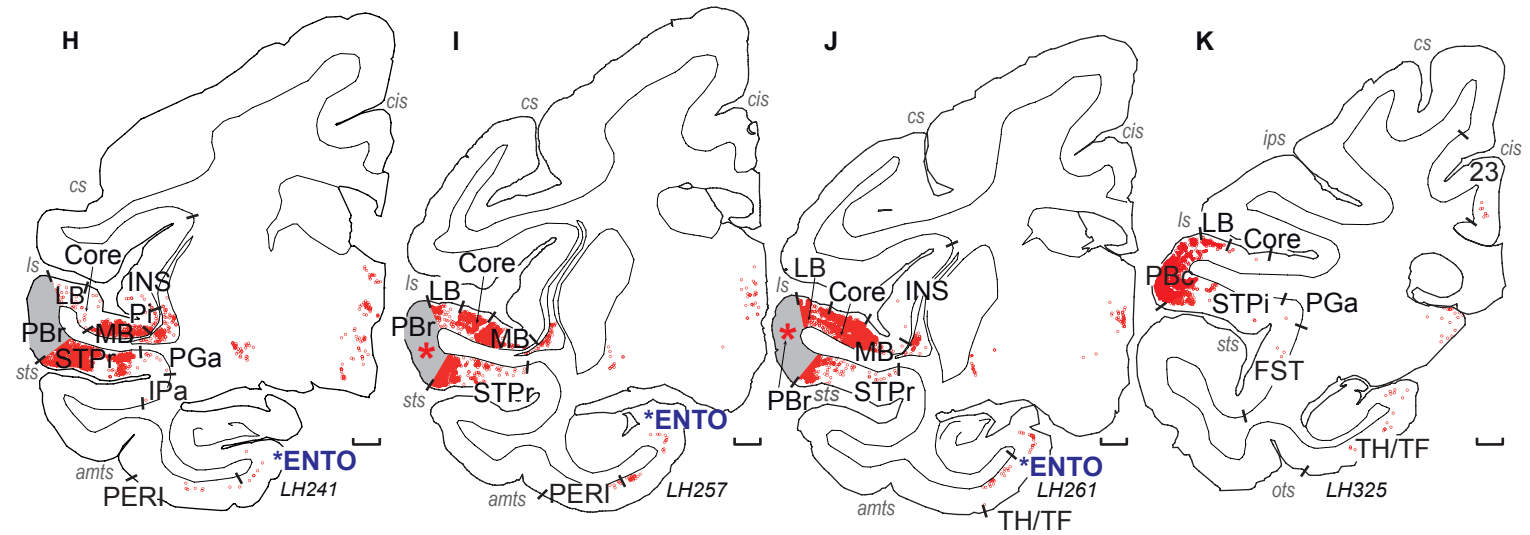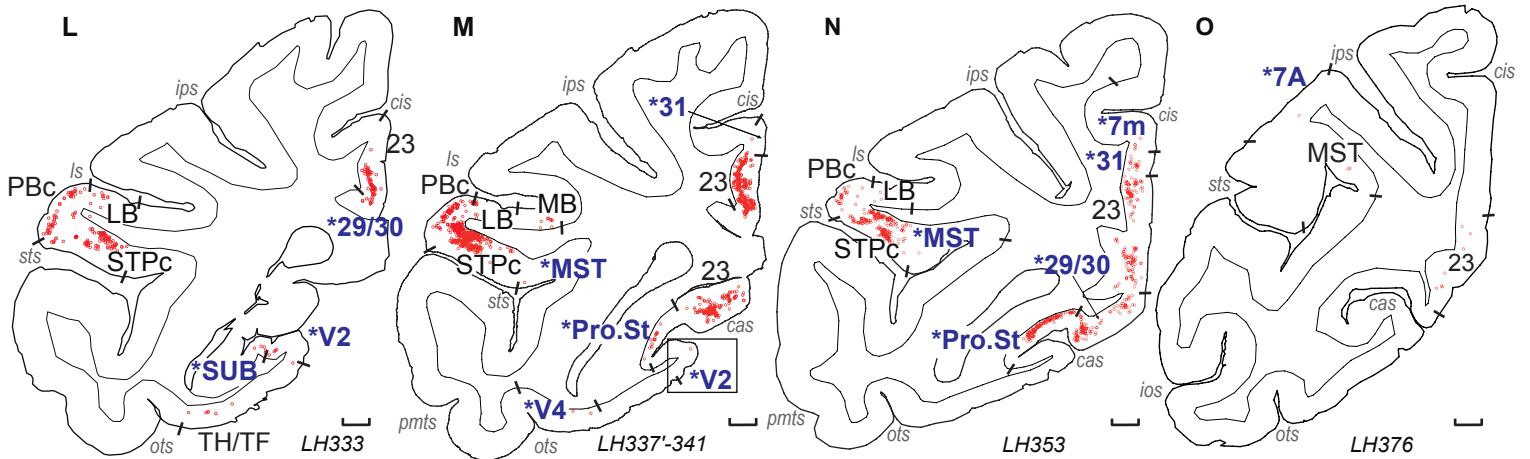

**P**

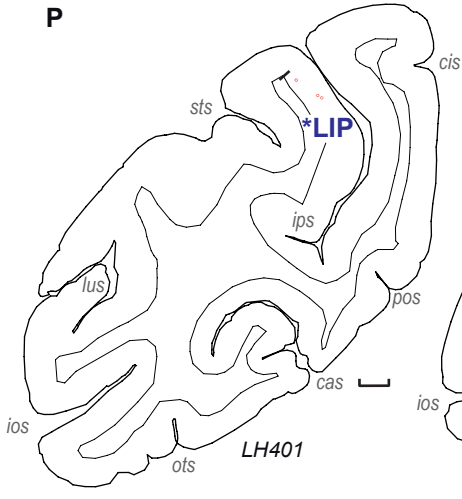

LH401

**Q**

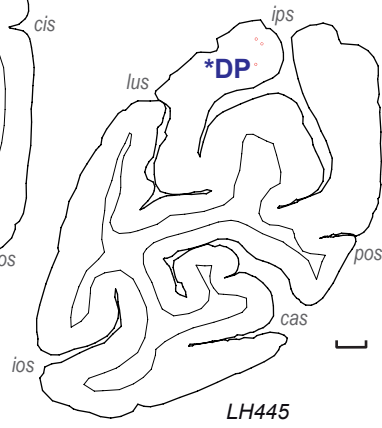

LH445

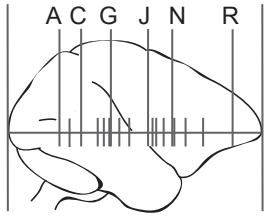

**Case 24: M128LH**

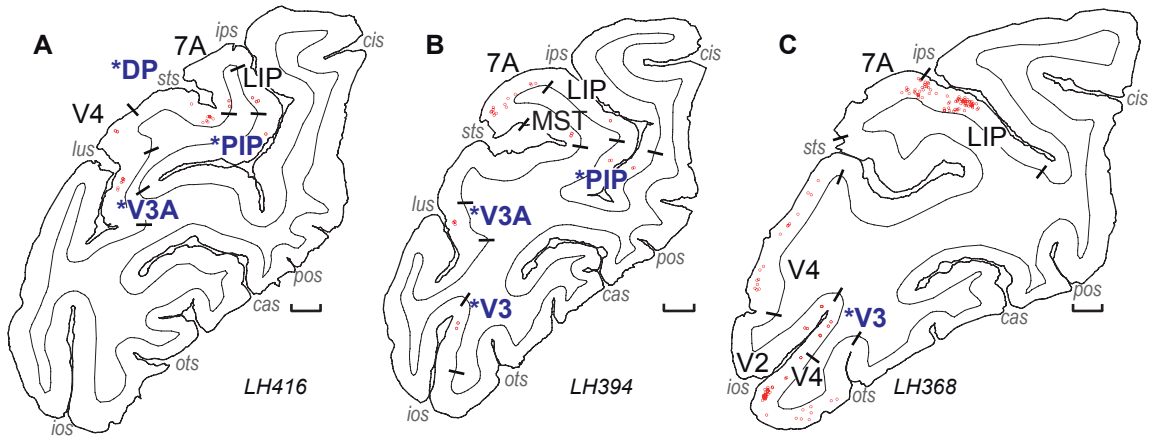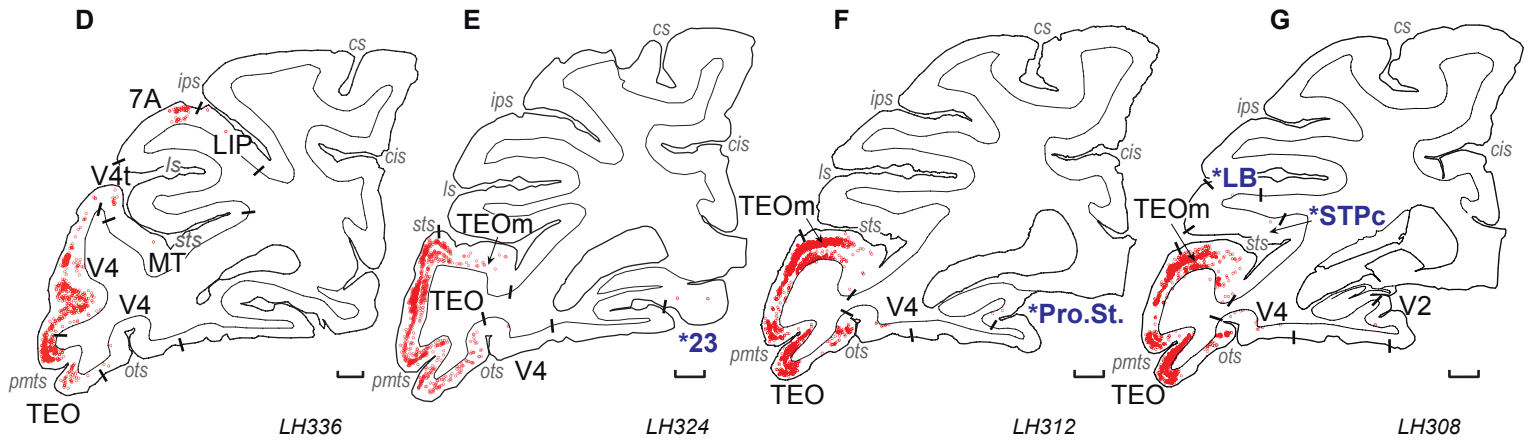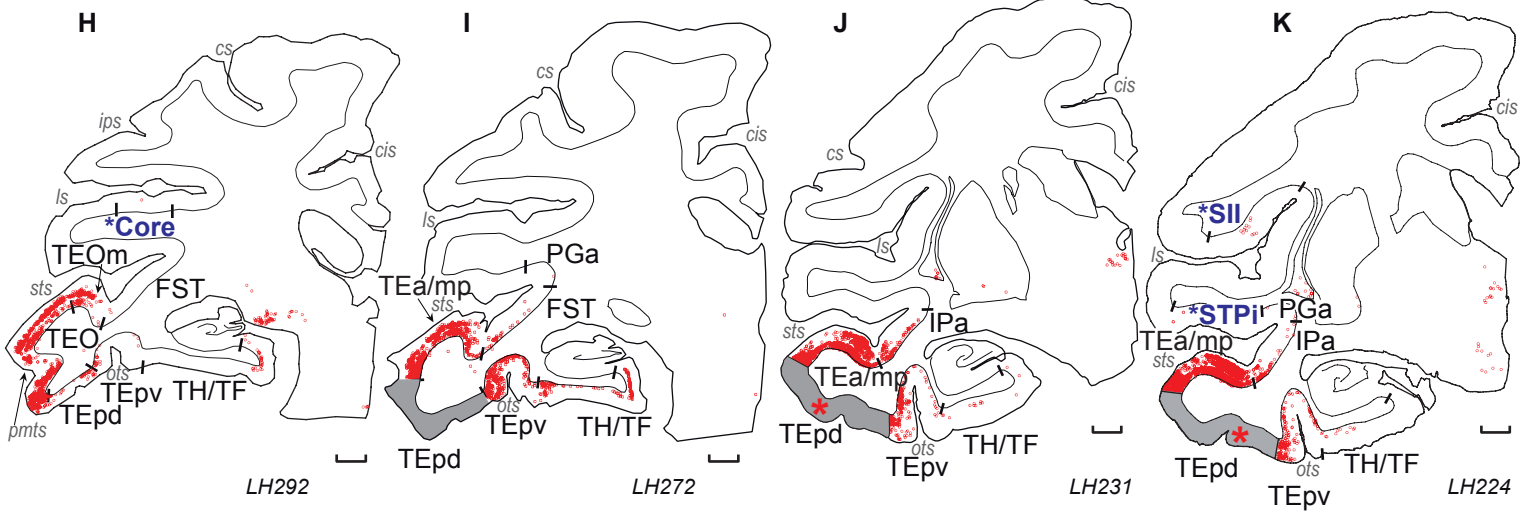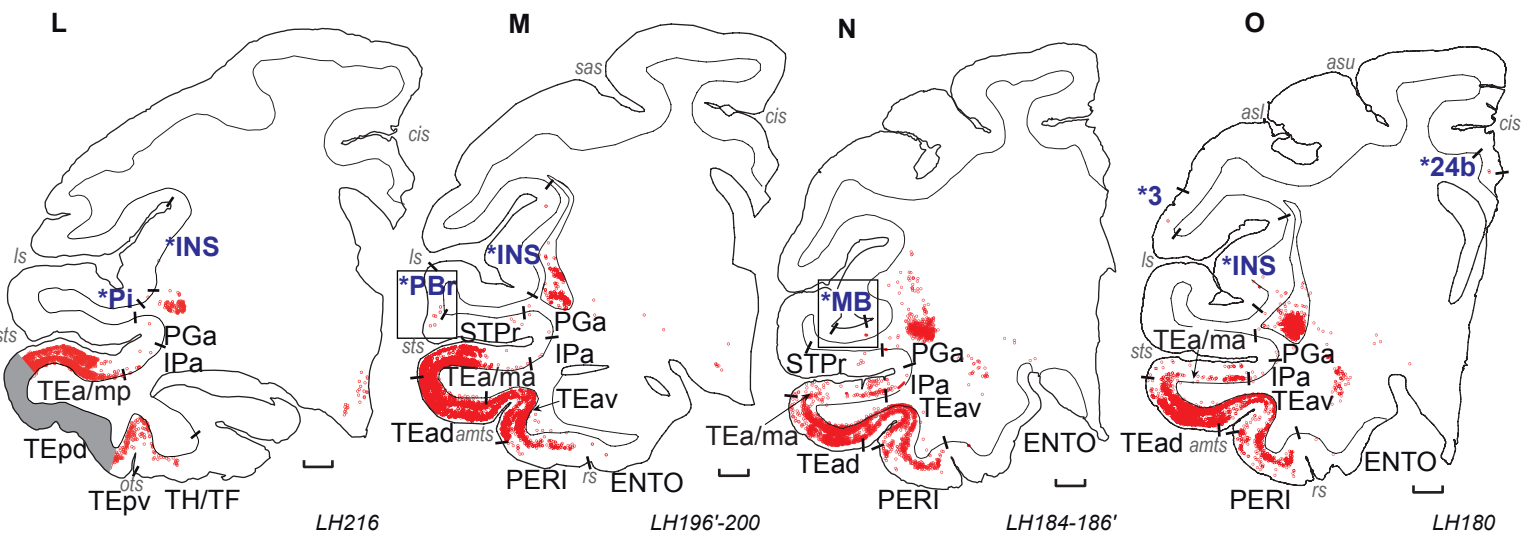



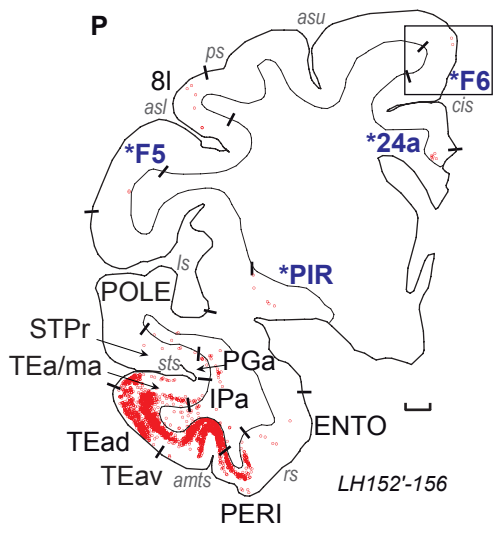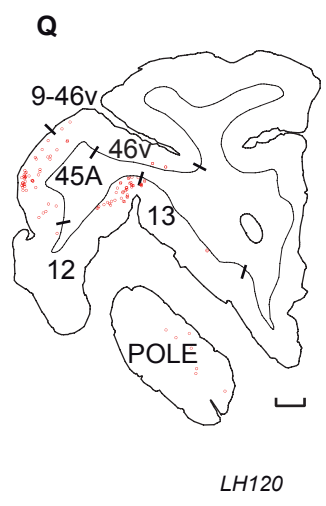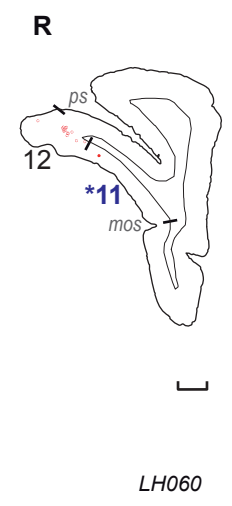

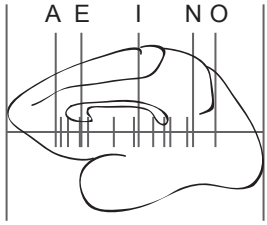

**Case 25: NICO RH**

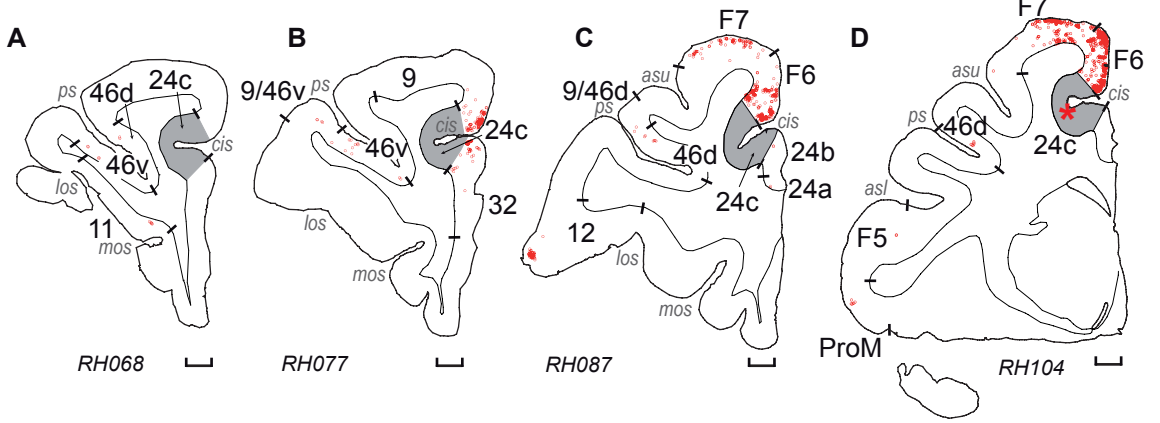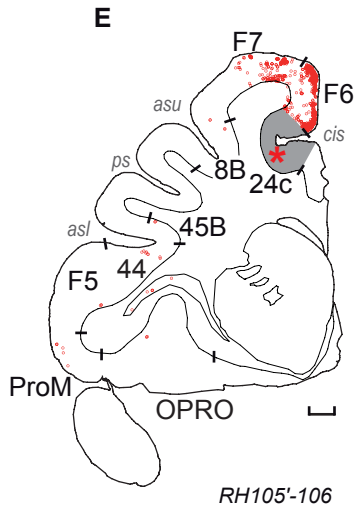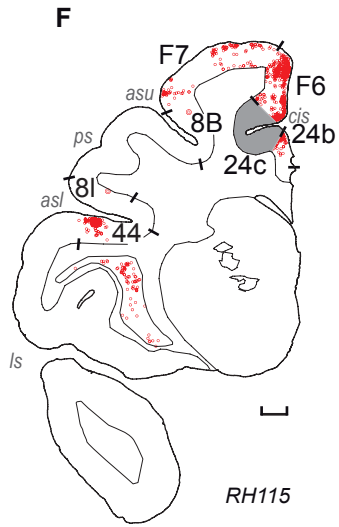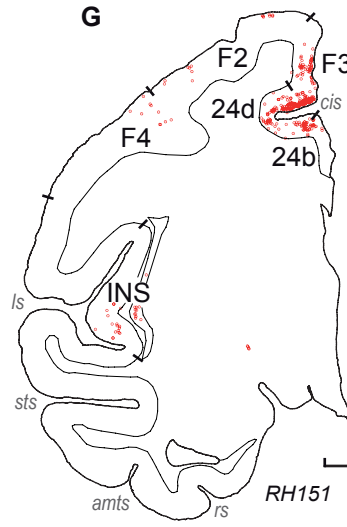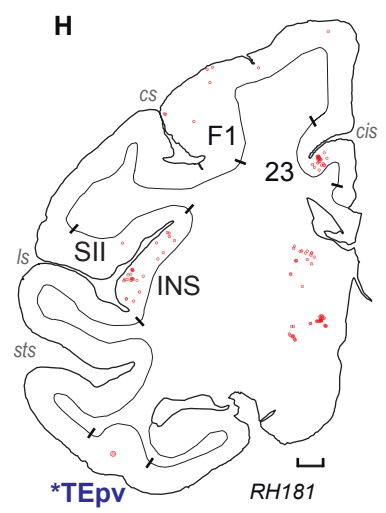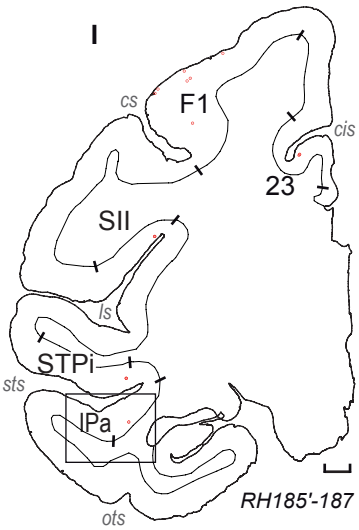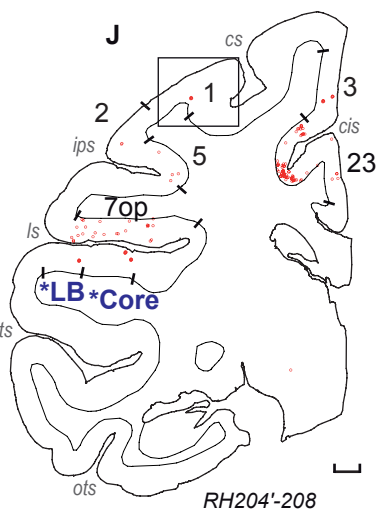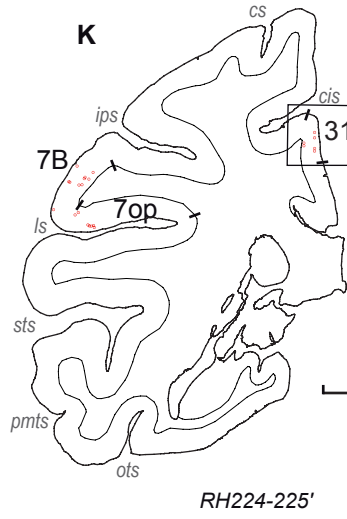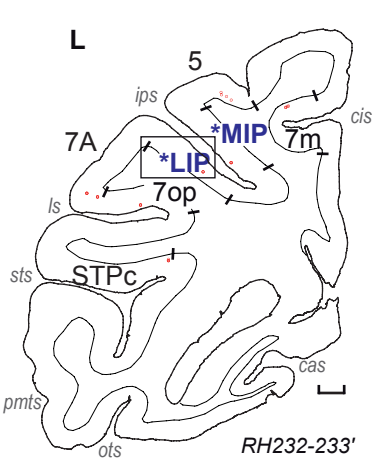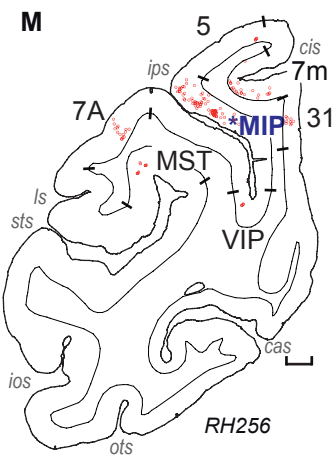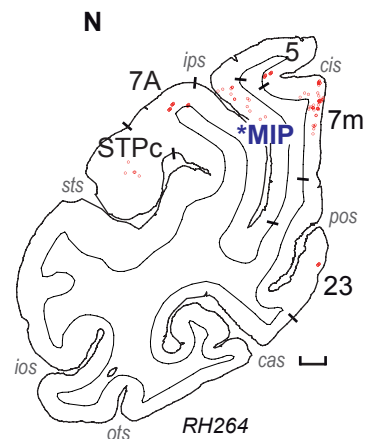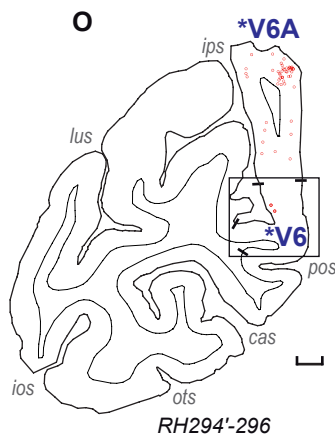

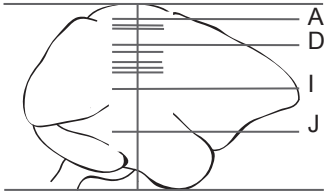

**A**

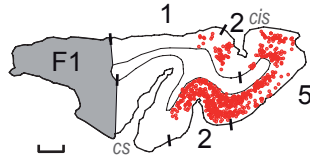

**B**

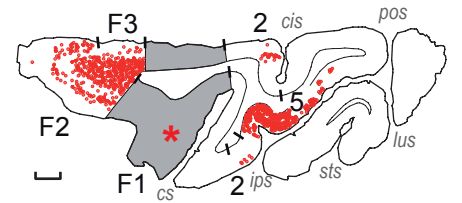

**Case 26: M069LH**

LH023

LH035

**C**

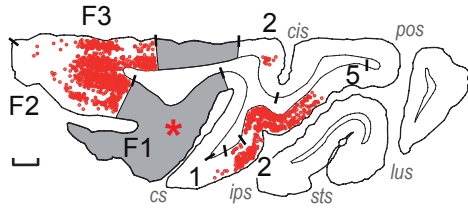

LH039

**D**

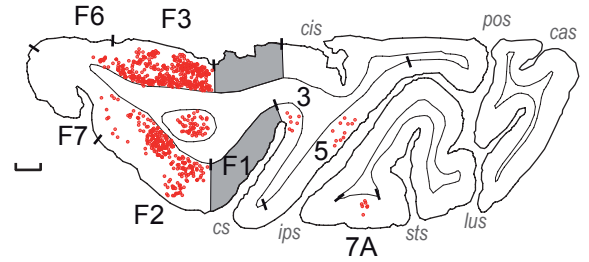

LH067

**E**

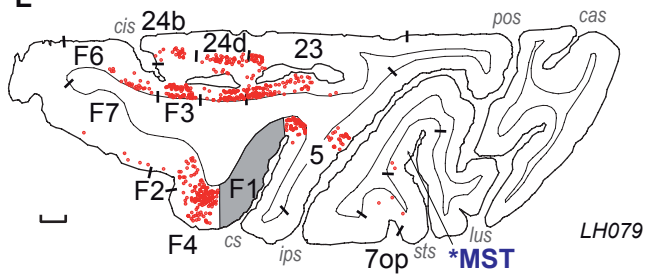

LH079

**F**

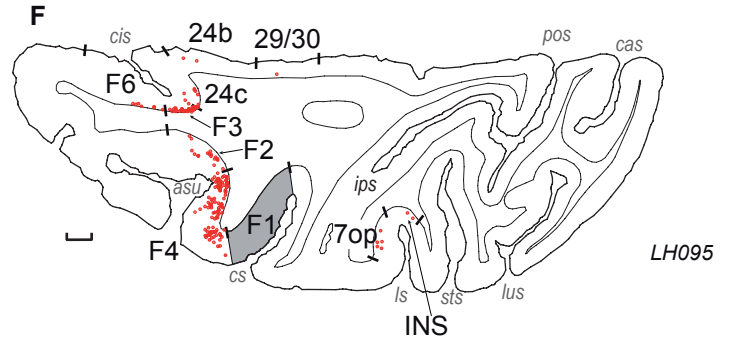

LH095

**G**

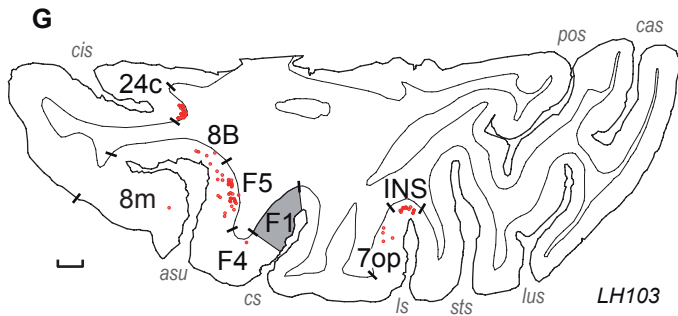

LH103

**H**

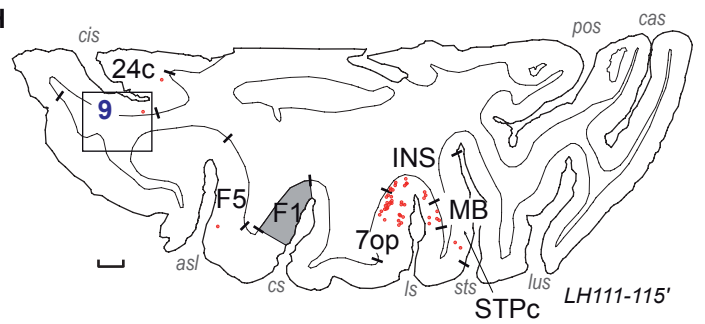

LH111-115'

**I**

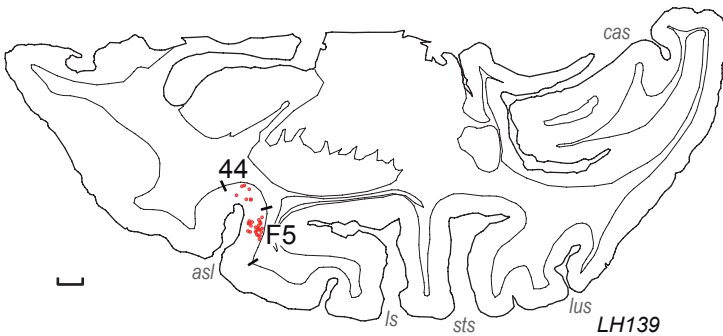

LH139

**J**

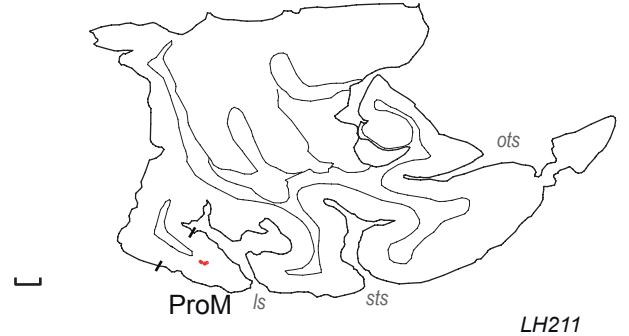

LH211

**Case 28: M102LH**

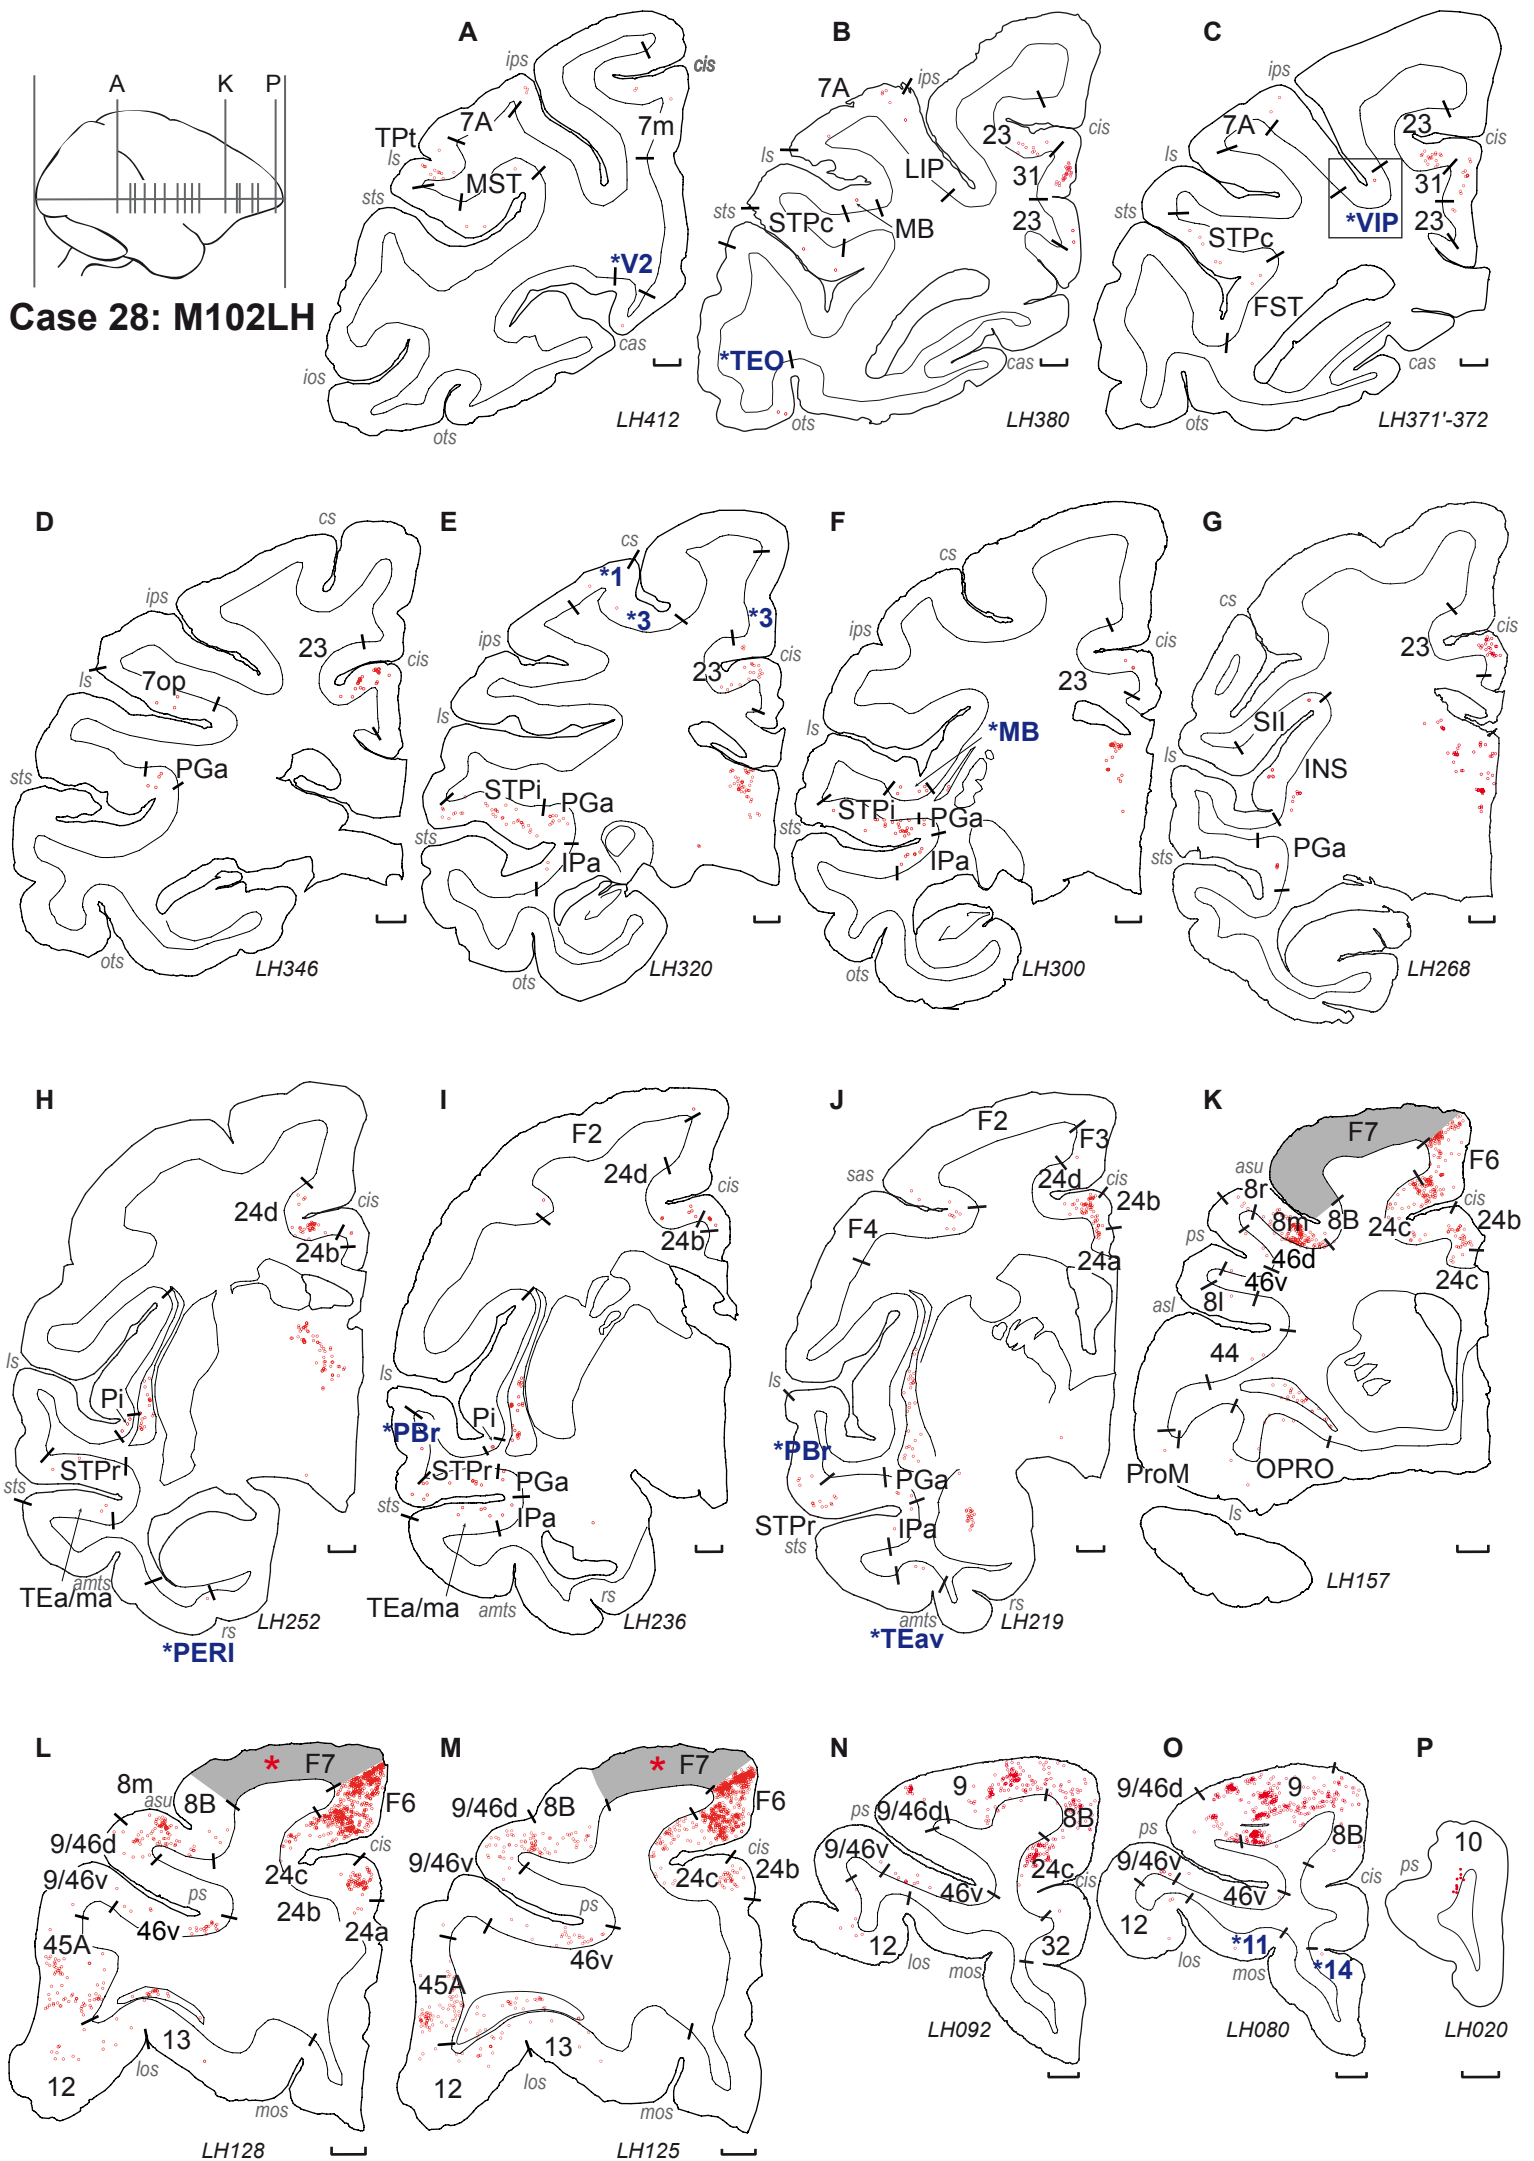

**Case 29: M098LH**

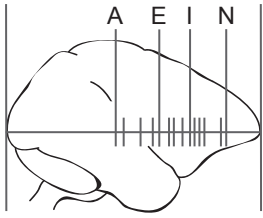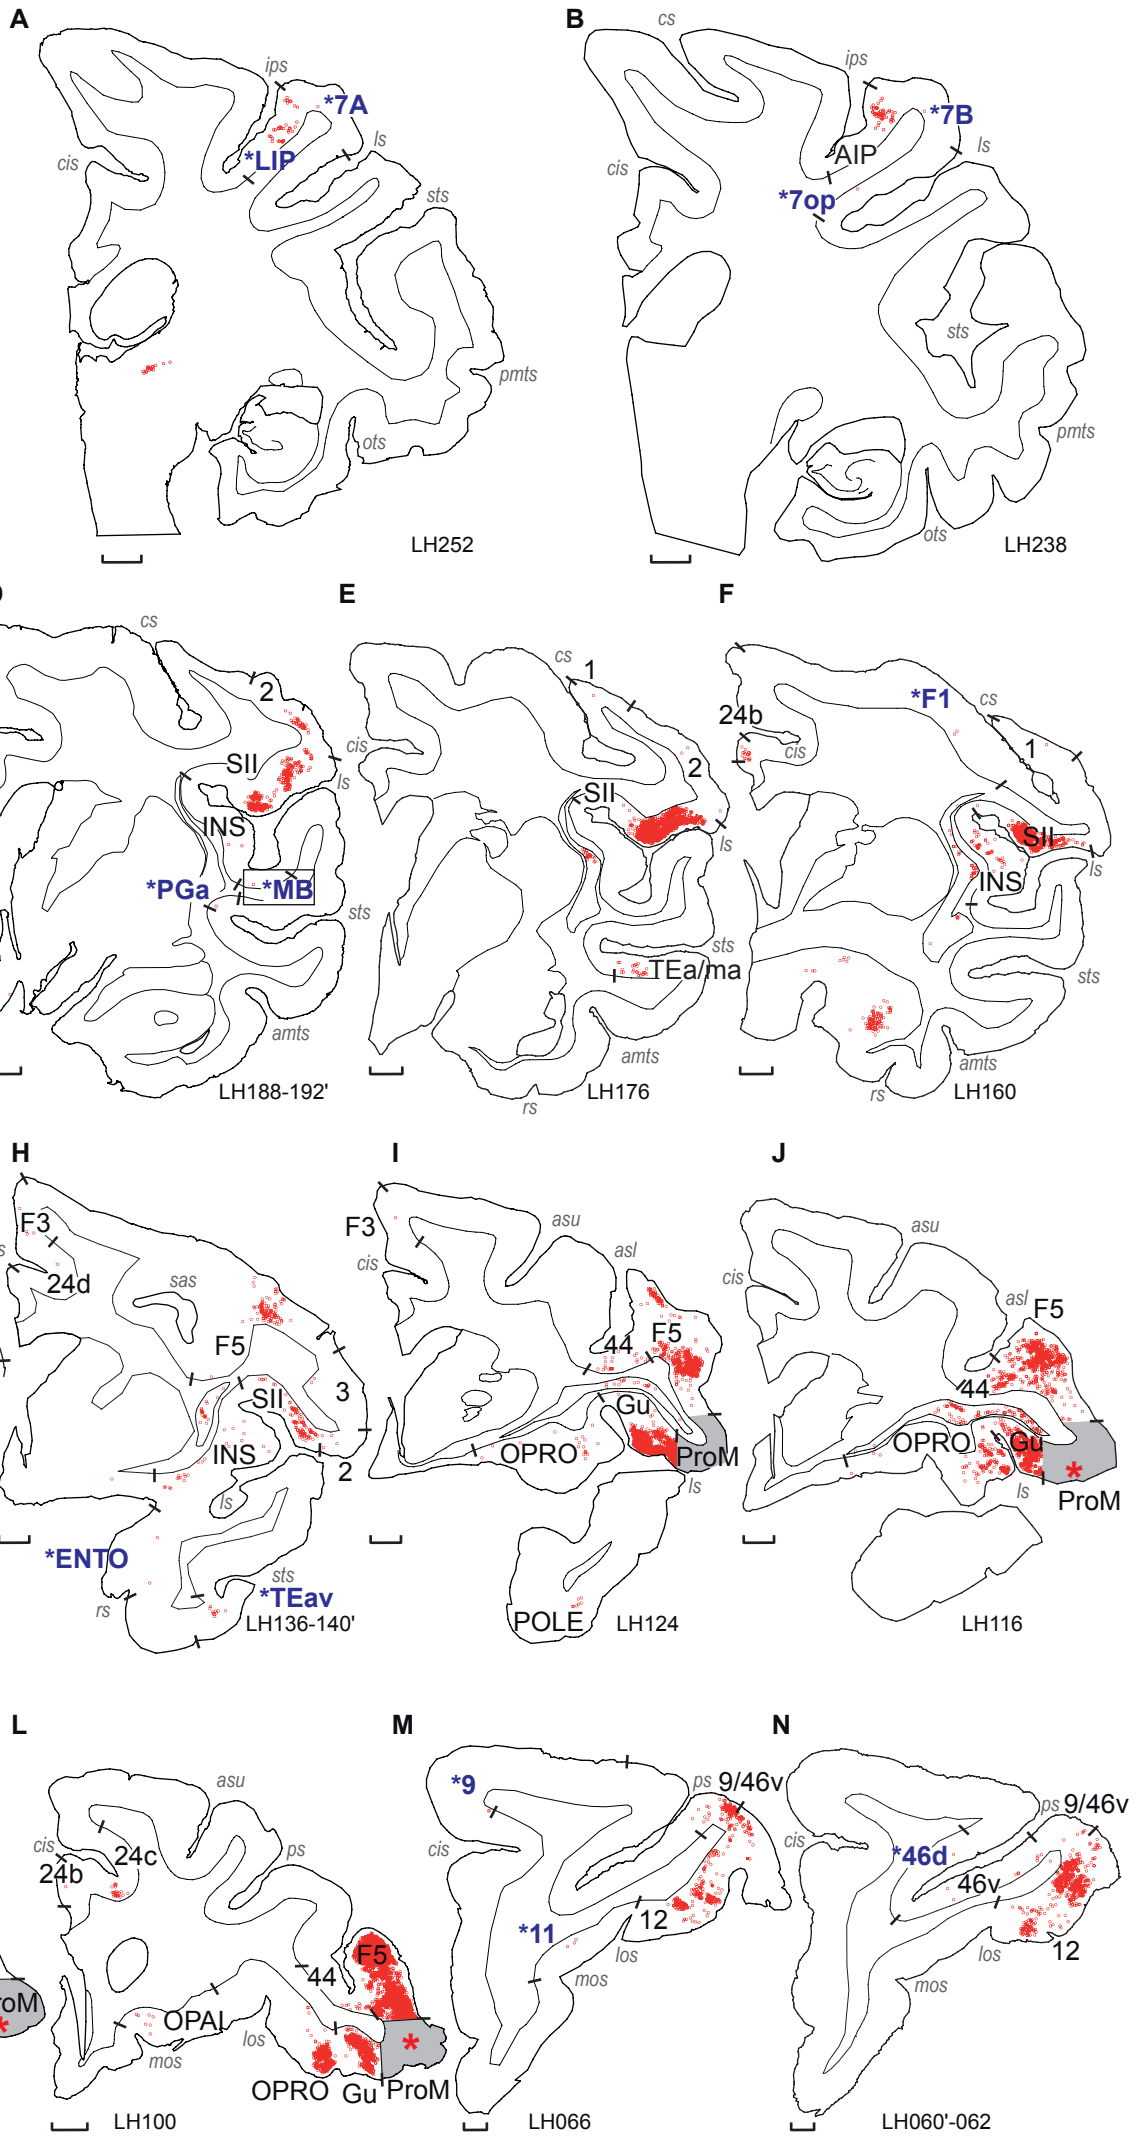





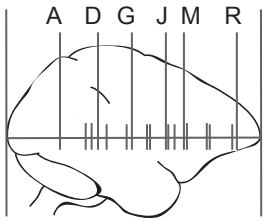

**Case 31: M116RH**

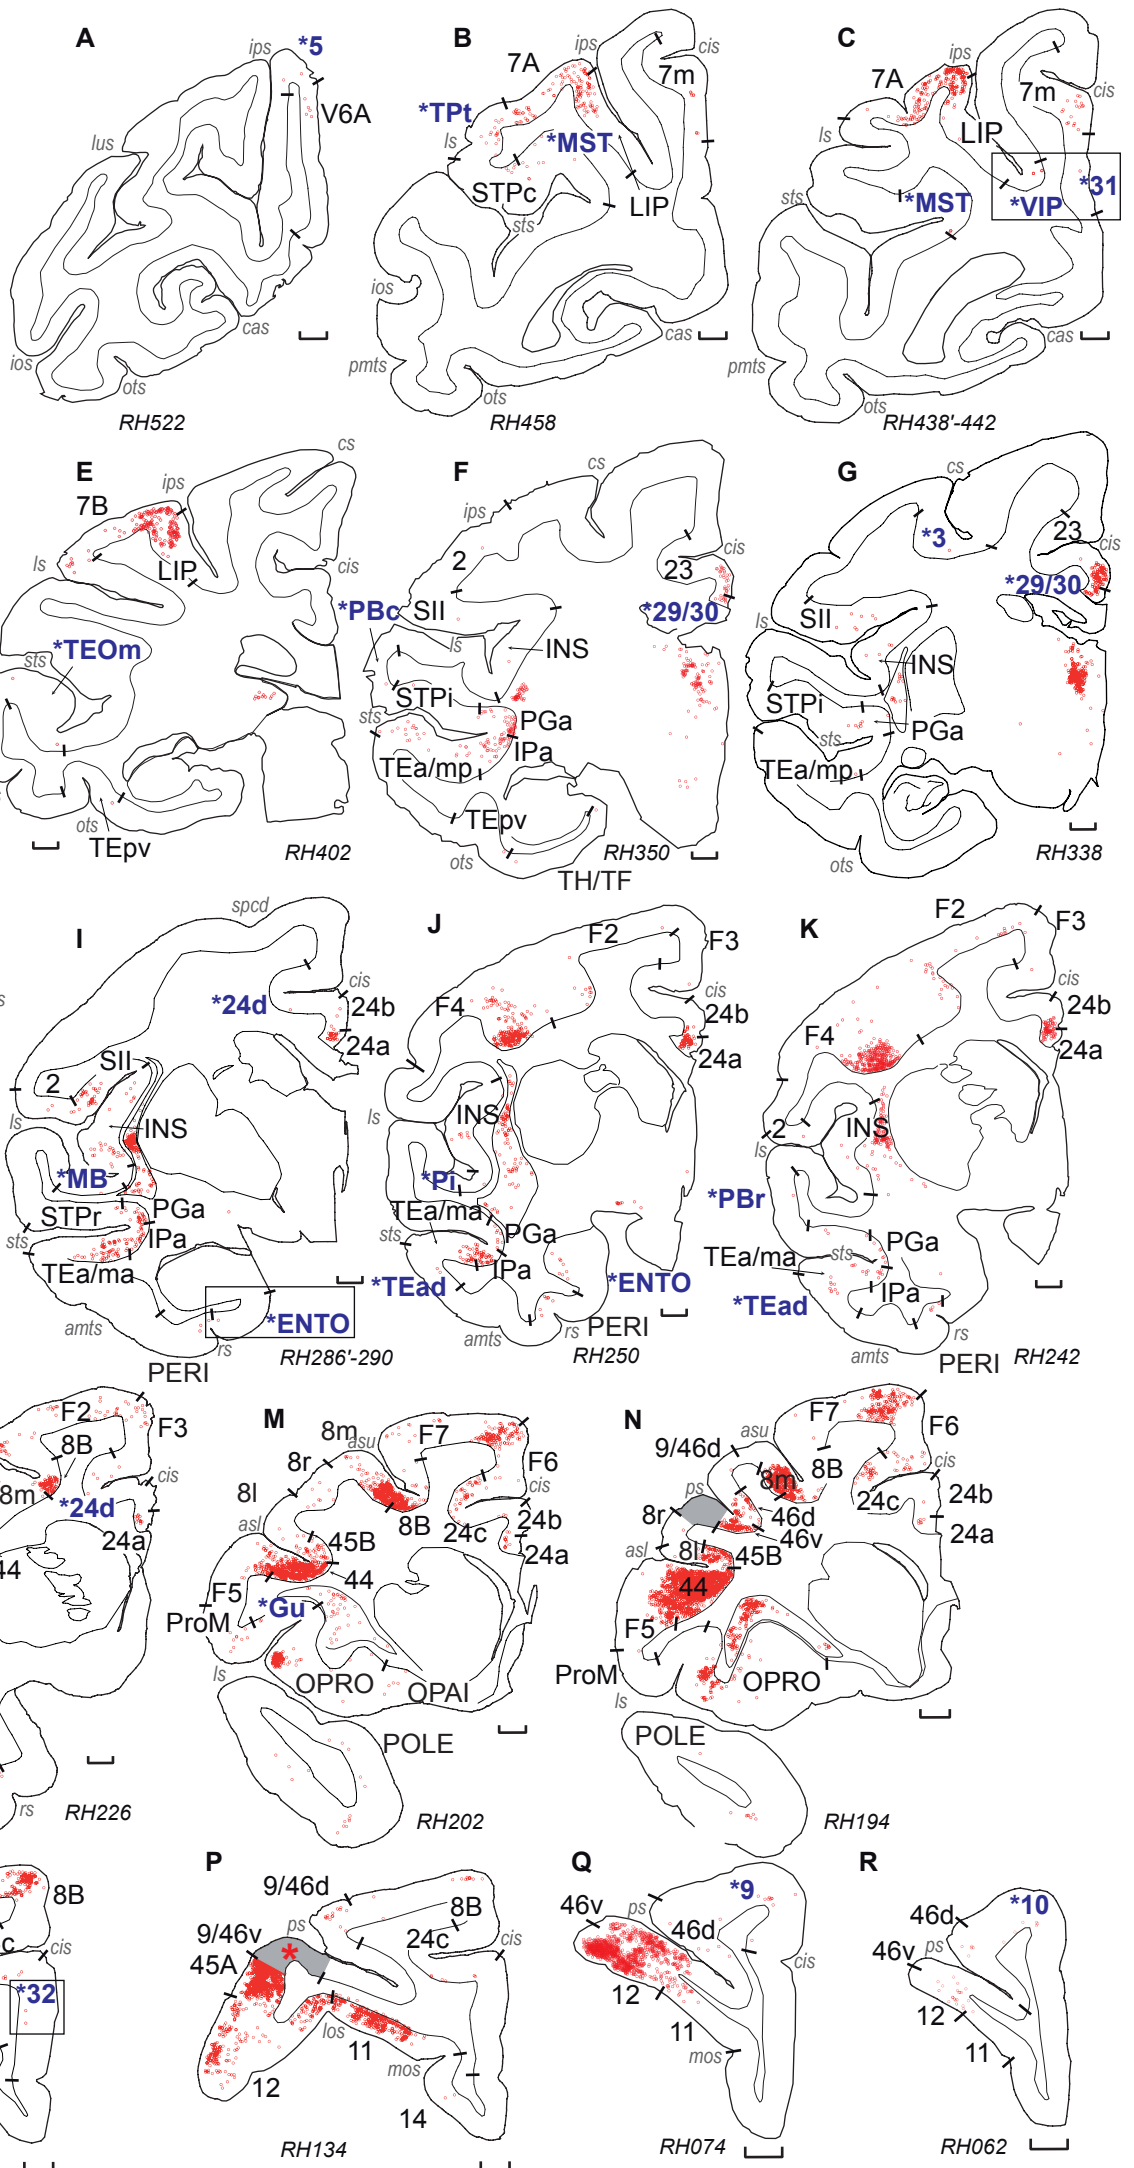

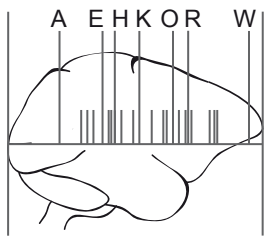

**Case 32: M116RH**

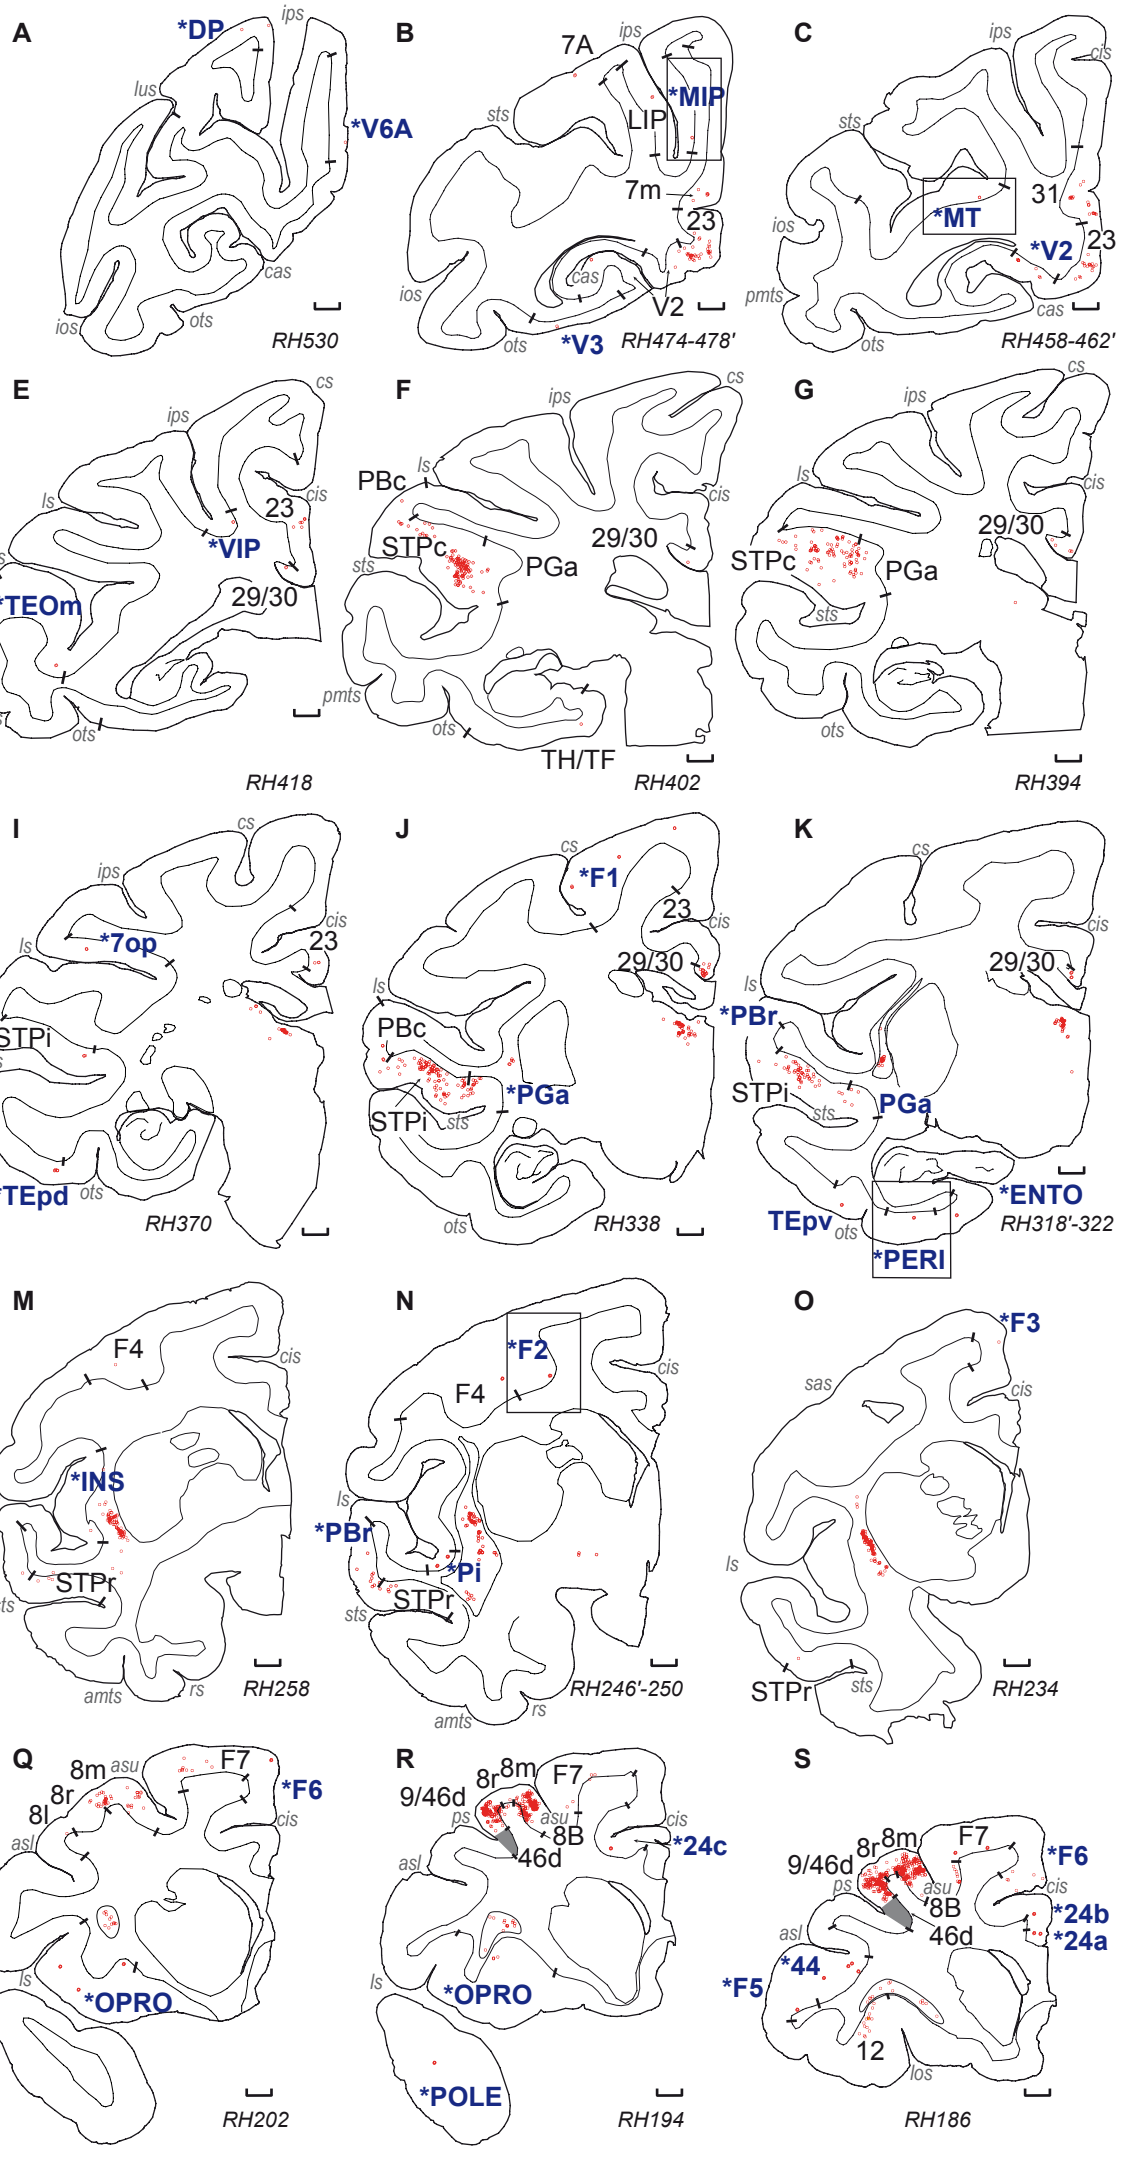



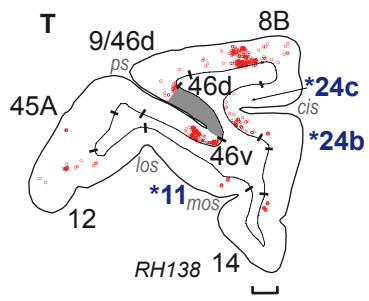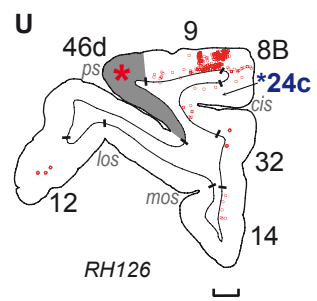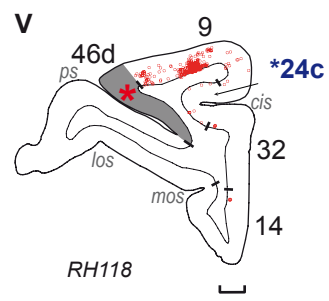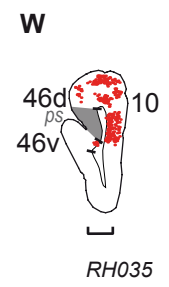

**Case 33: M128LH**

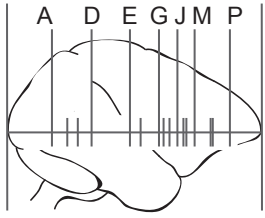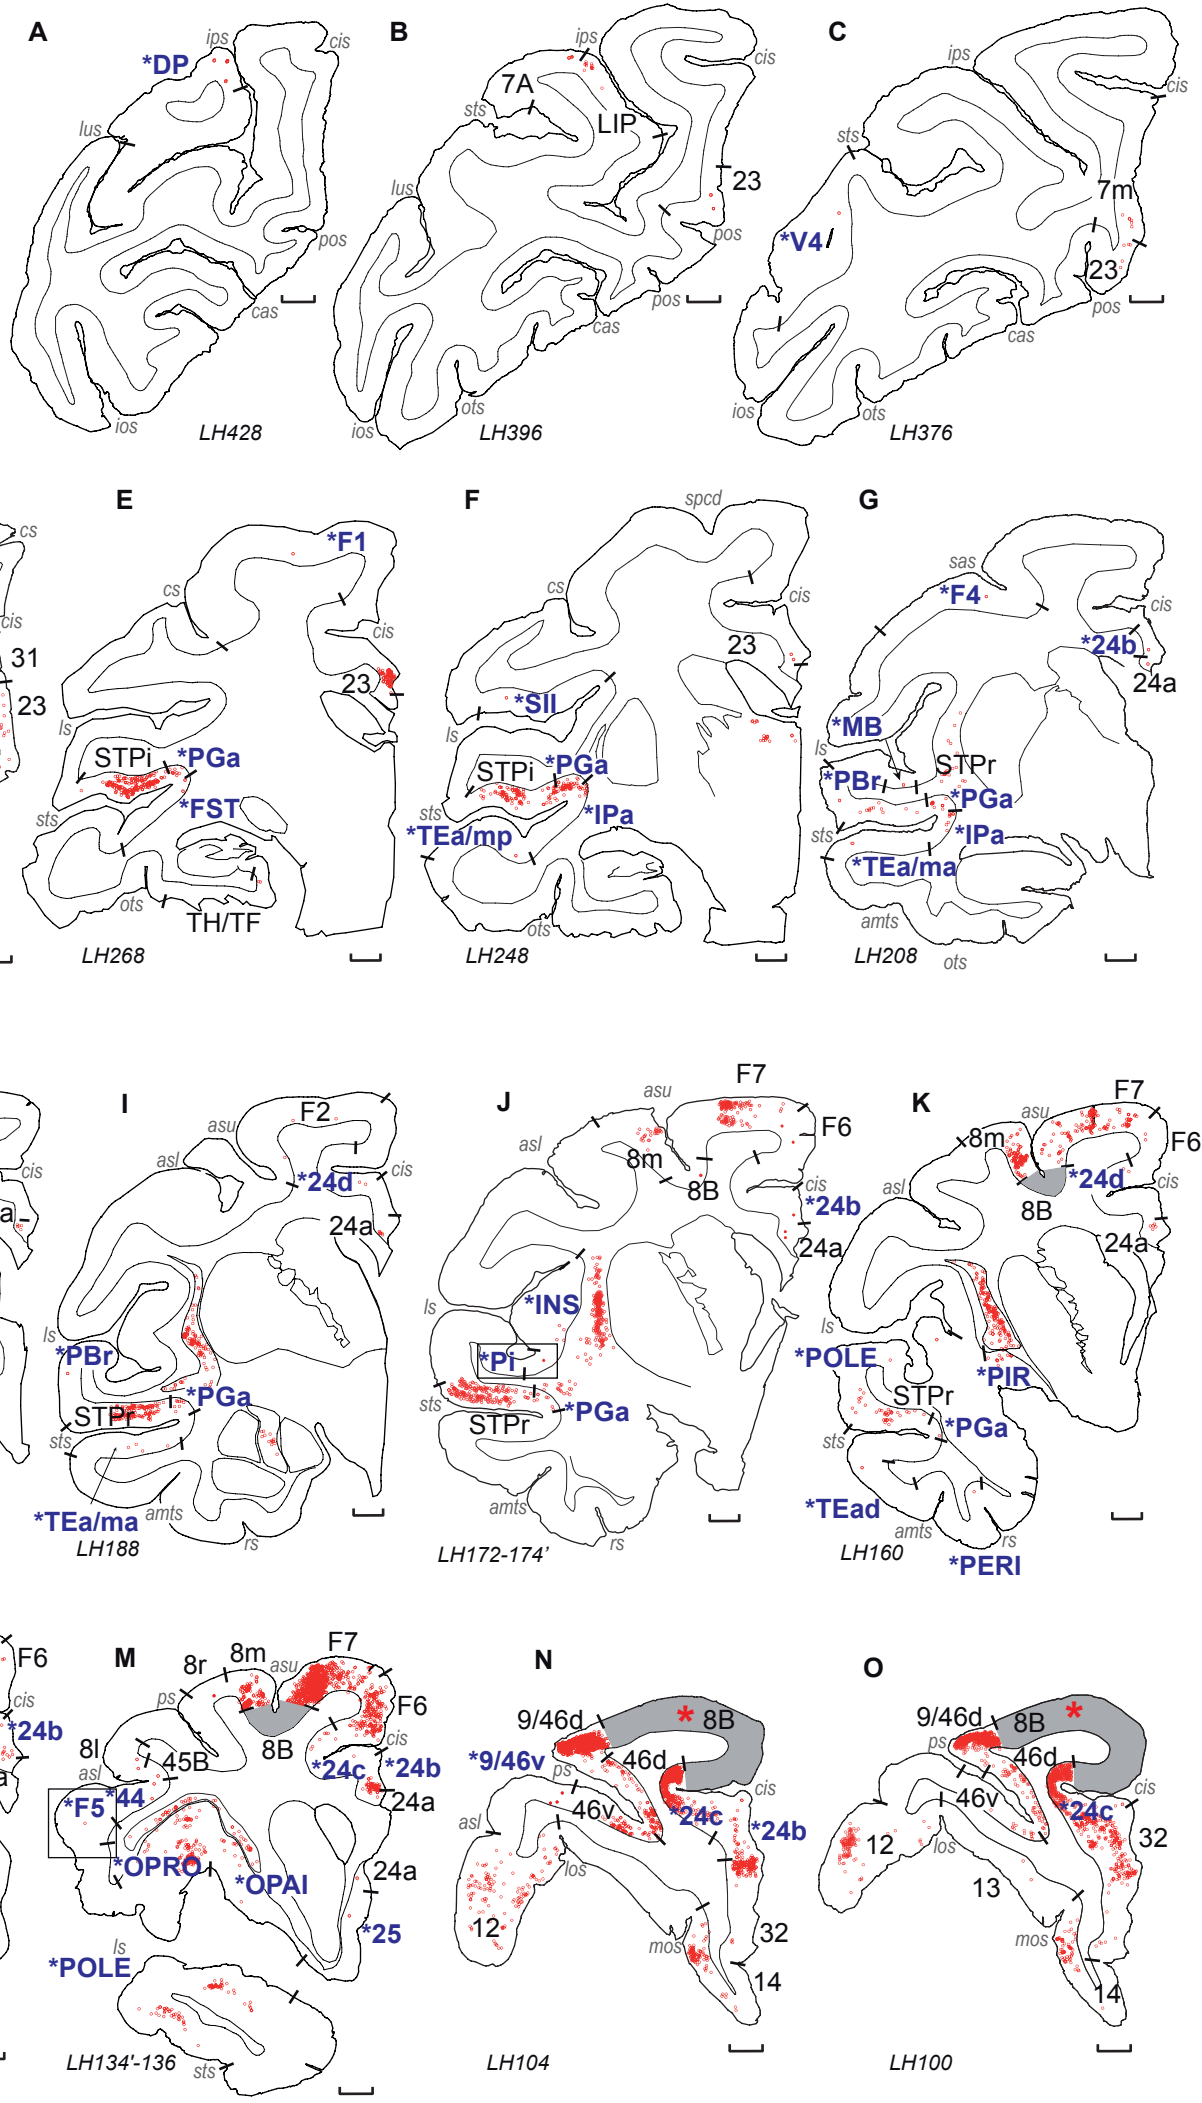

P

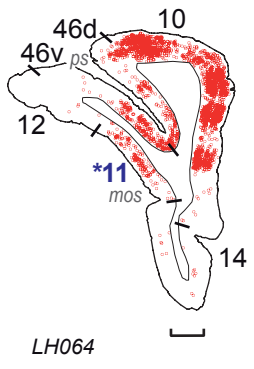

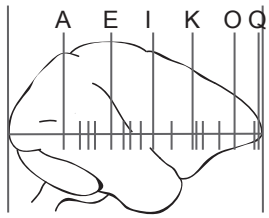

**Case 34 : M131LH**

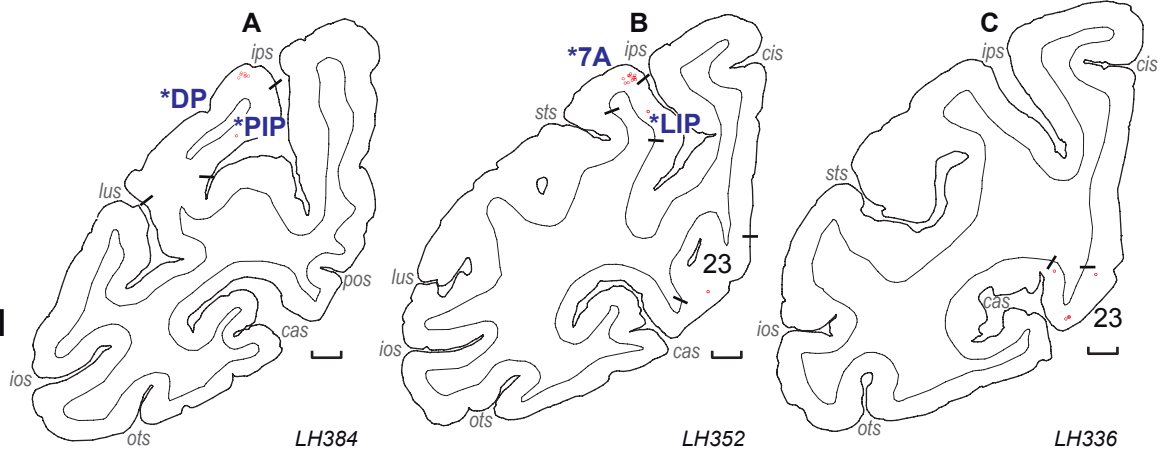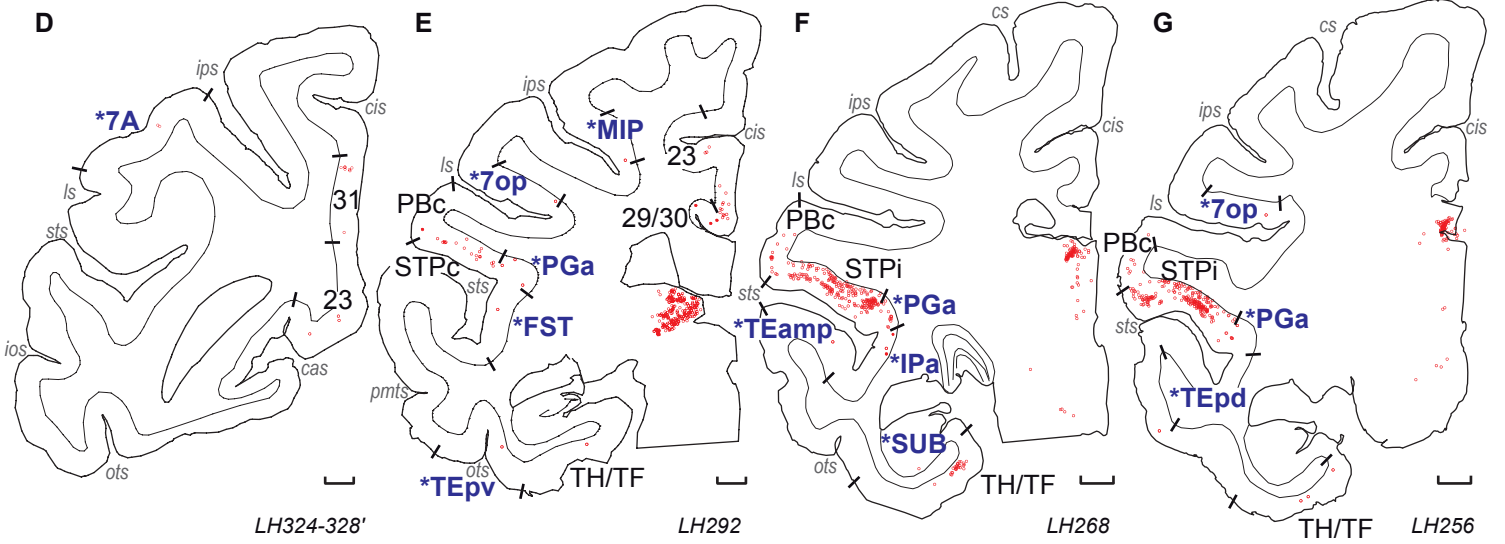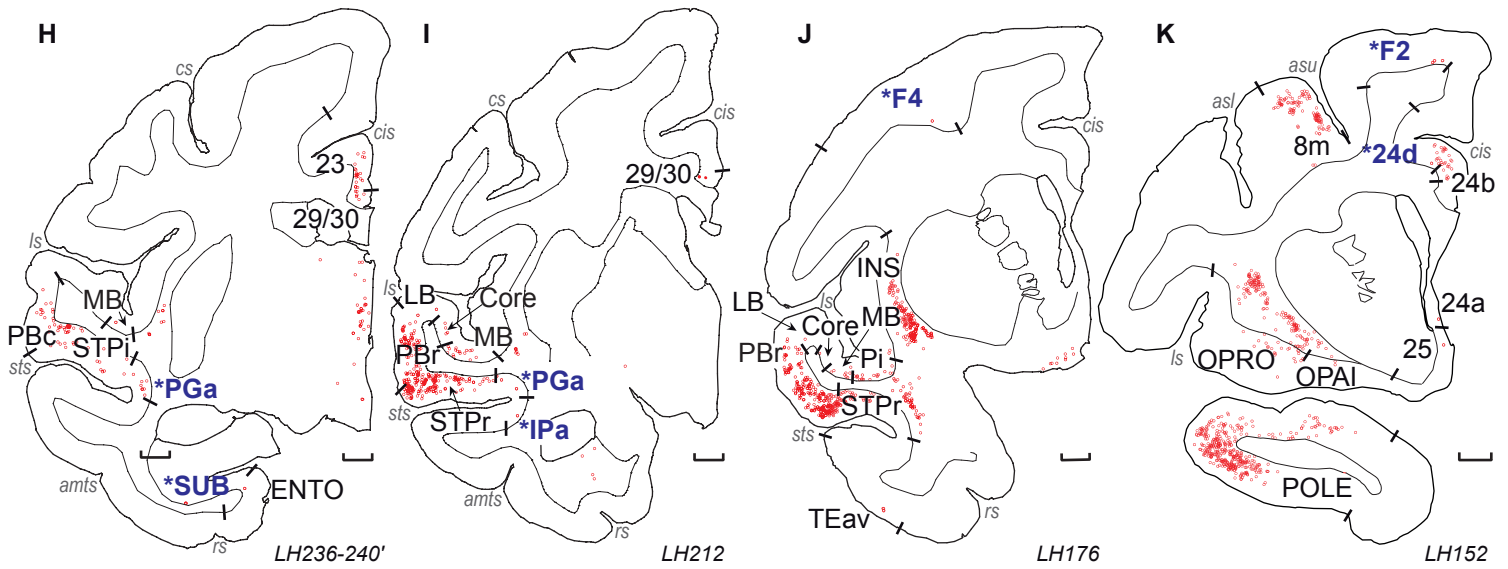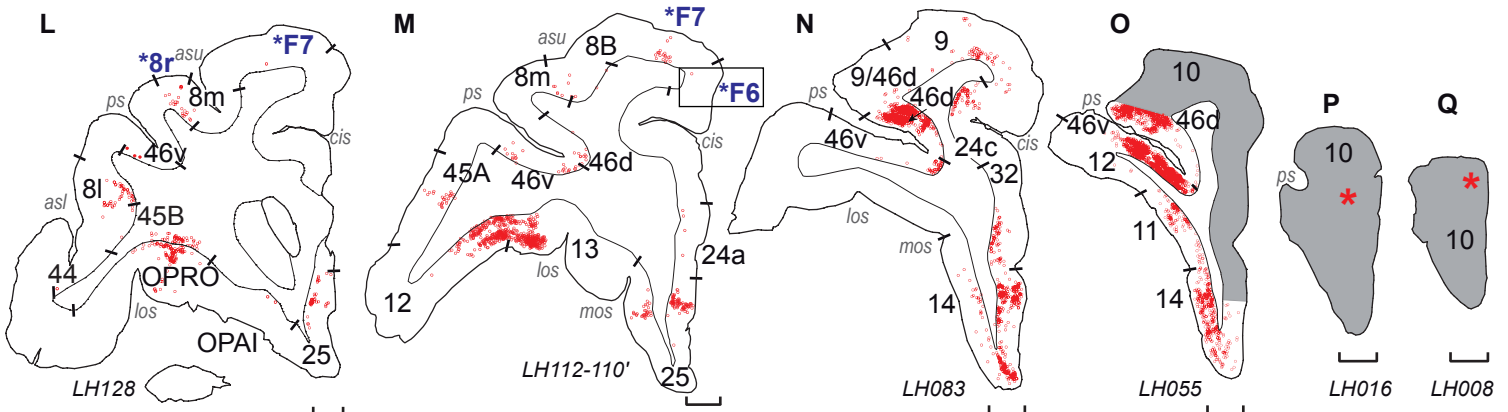

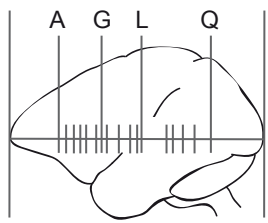

**Case 35 : M133LH**

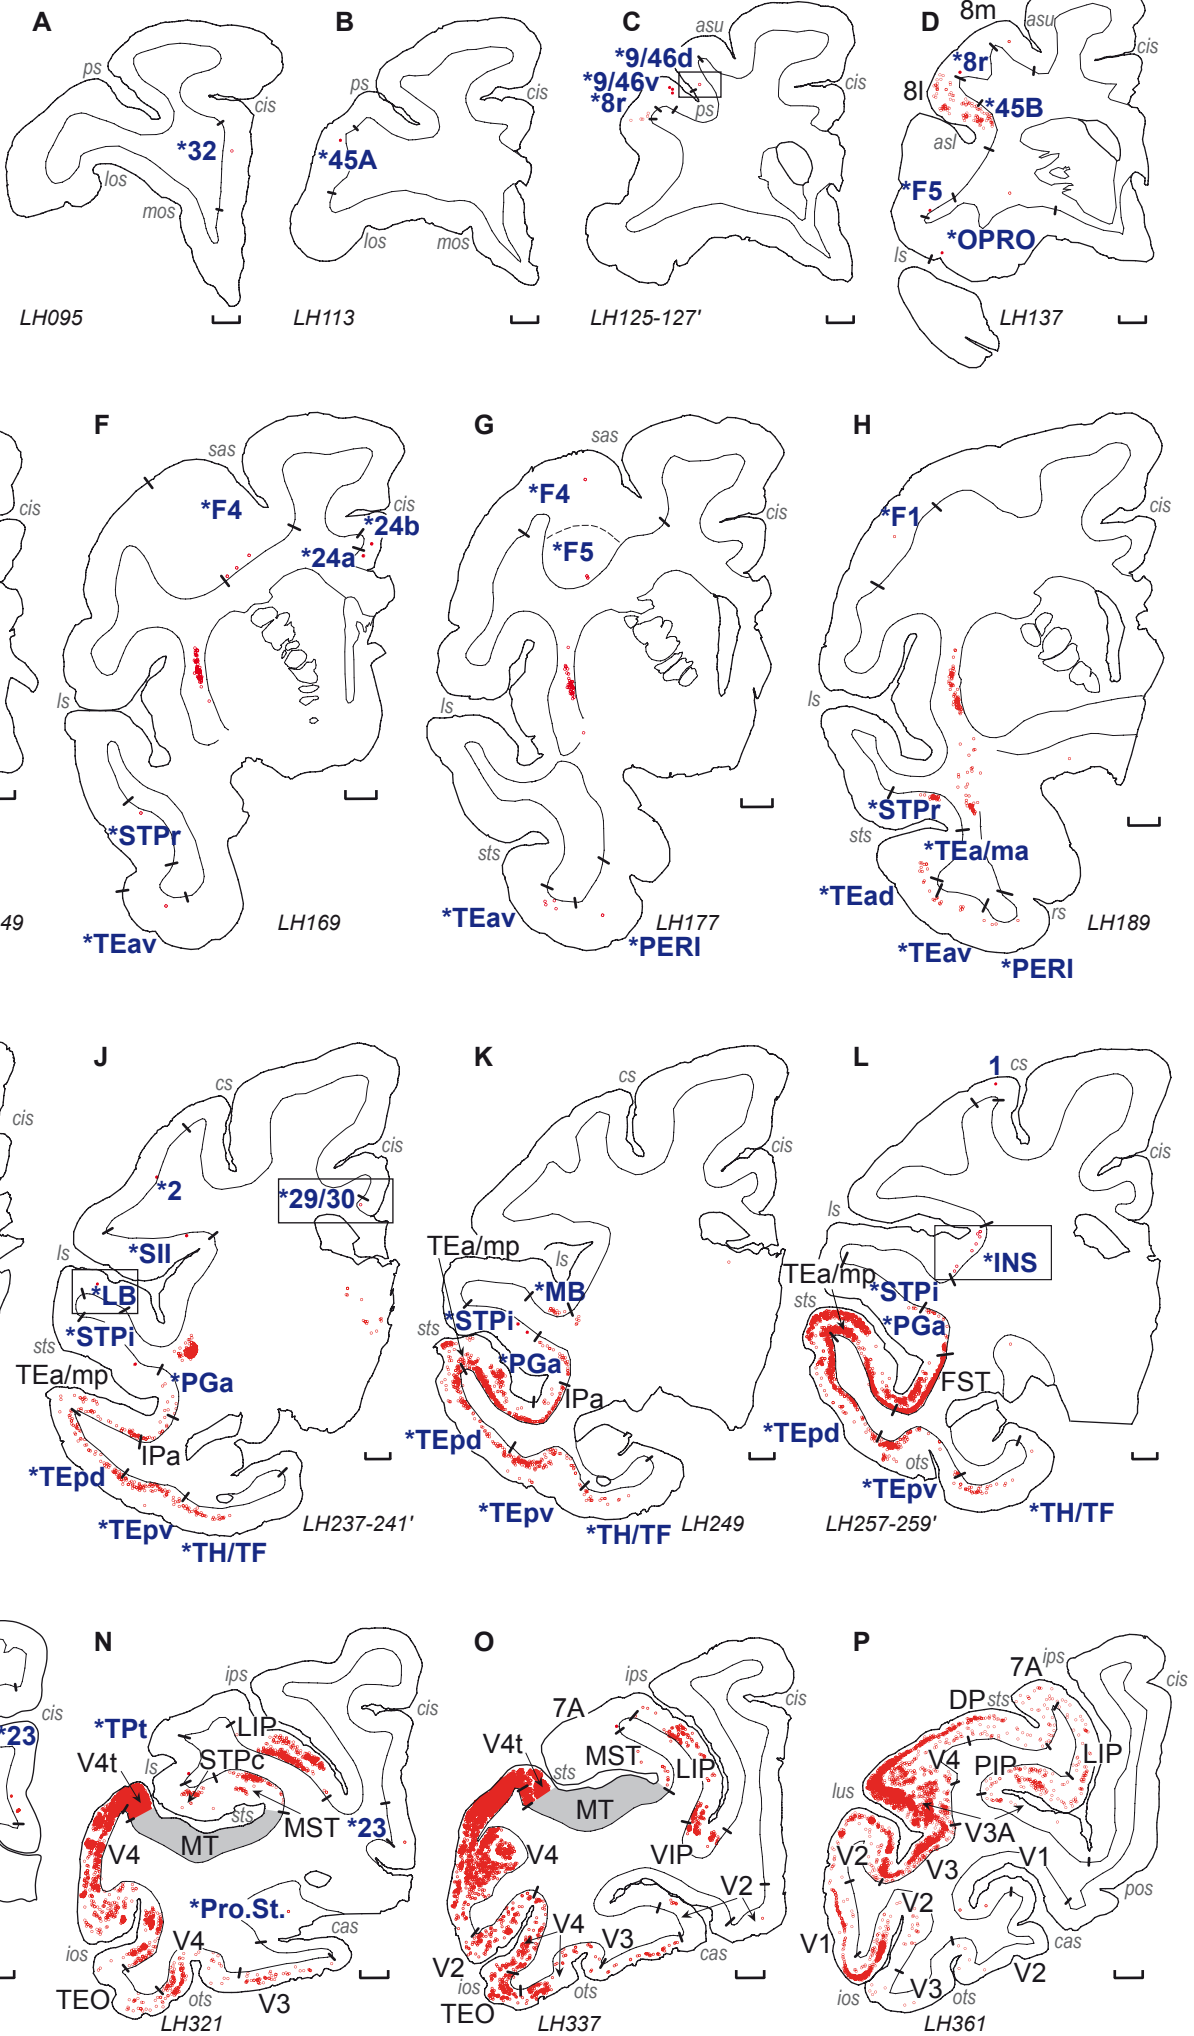

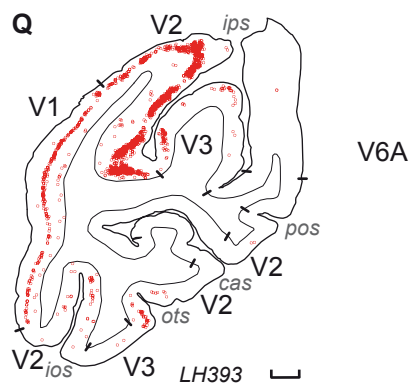



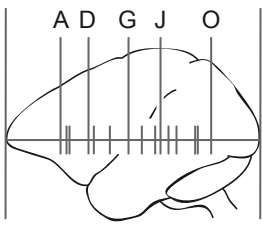

**Case 36 : M136LH**

**A**

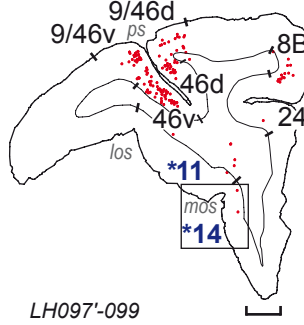

**B**

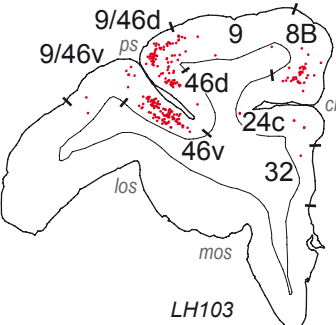

**C**

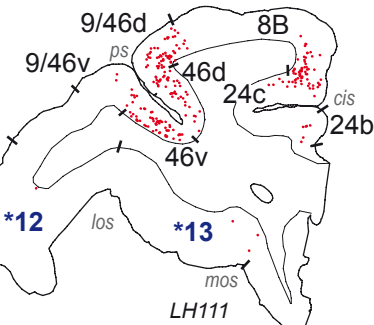

**D**

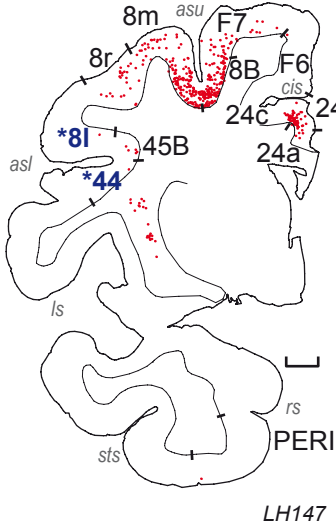

**E**

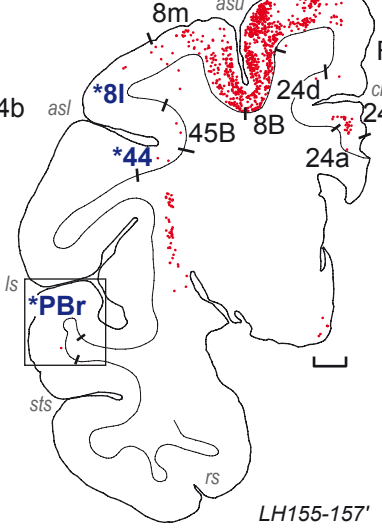

**F**

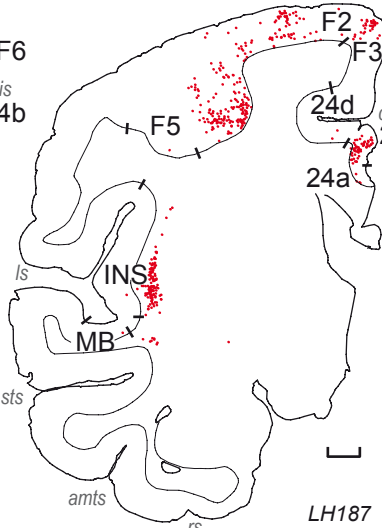

**G**

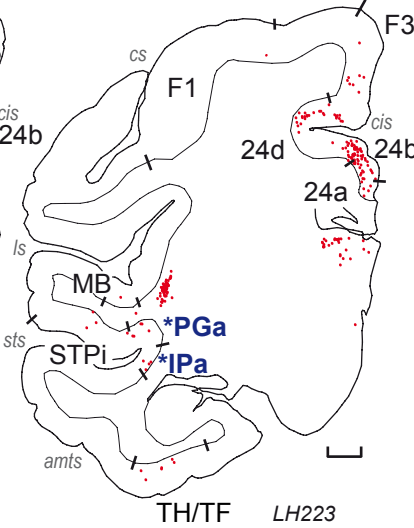

**H**

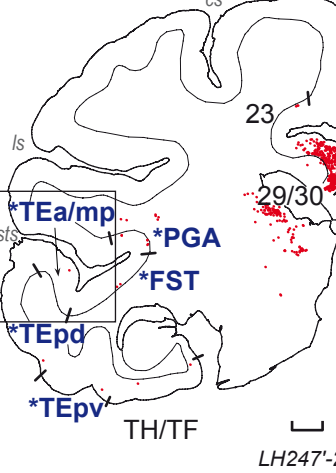

**I**

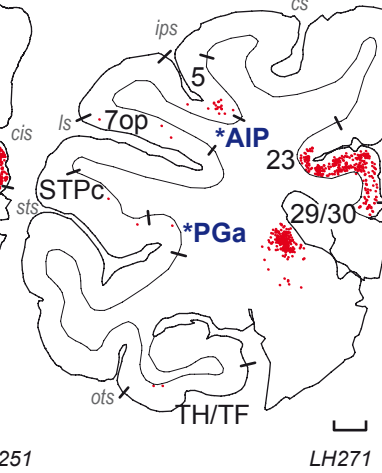

**J**

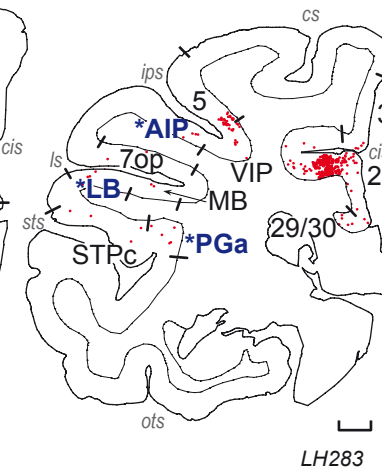

**K**

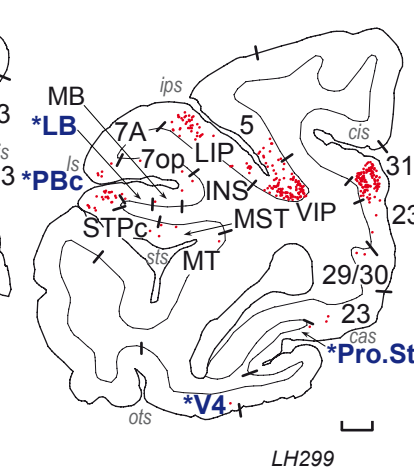

**L**

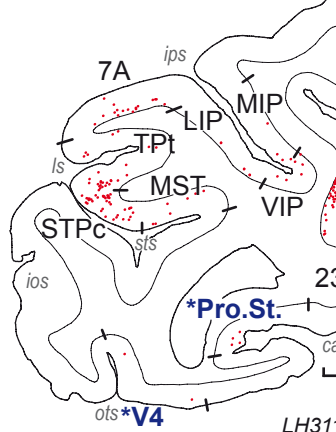

**M**

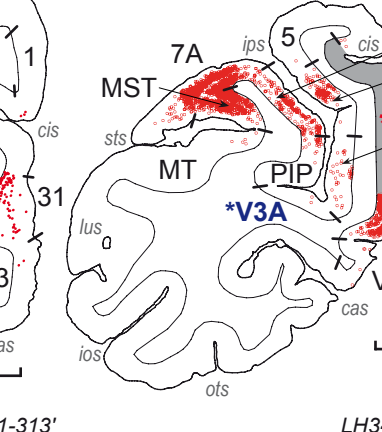

**N**

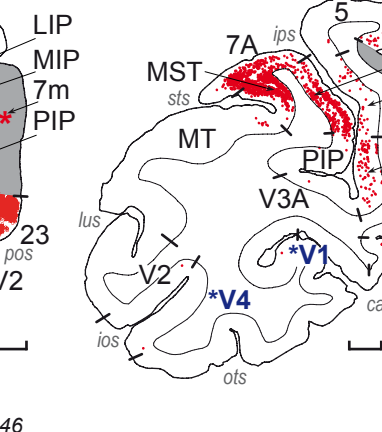

**O**

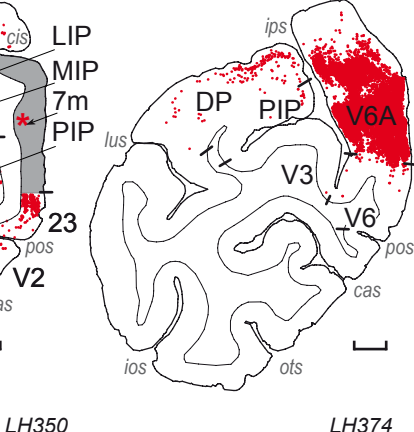



Figure S3 - Relationships of means from multiple injections to the 95 confidence intervals following single injections.

## Area V1

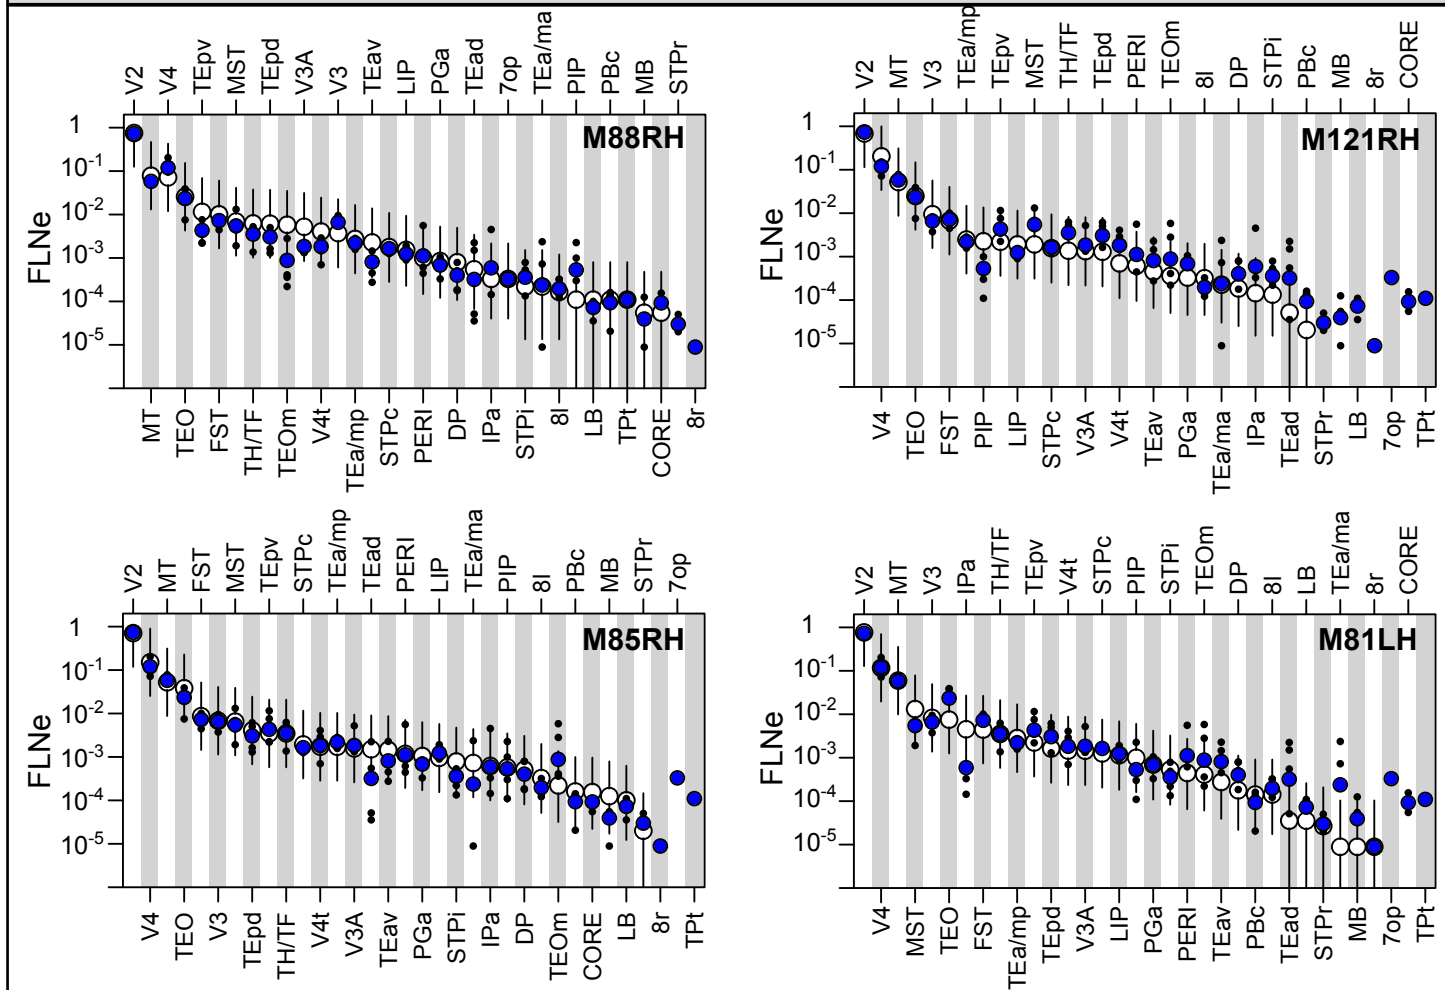

## Area V2

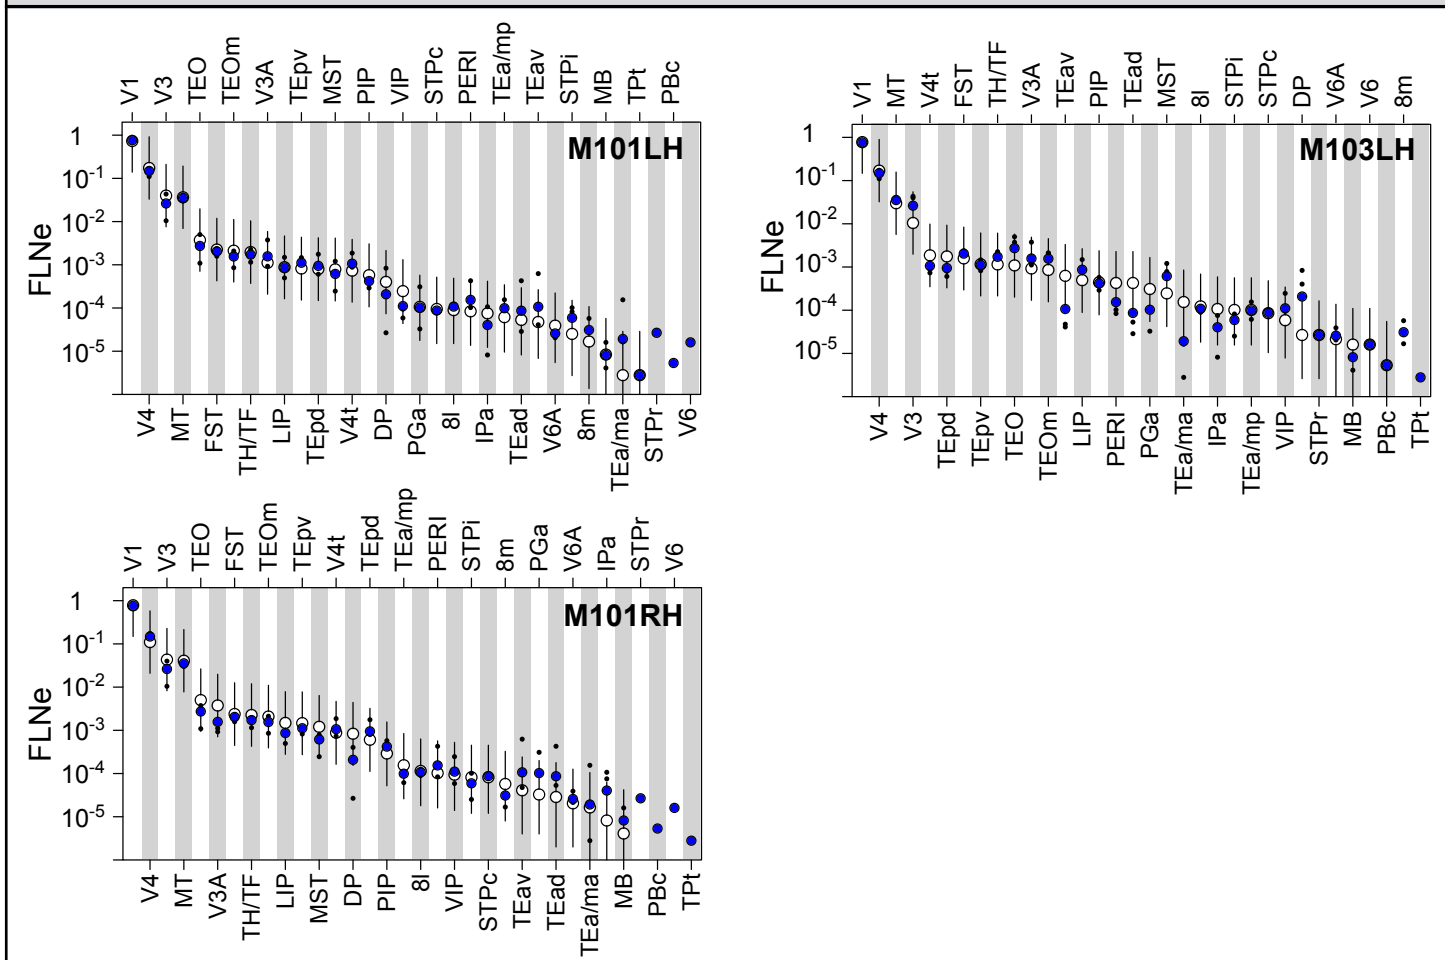

## Area V4

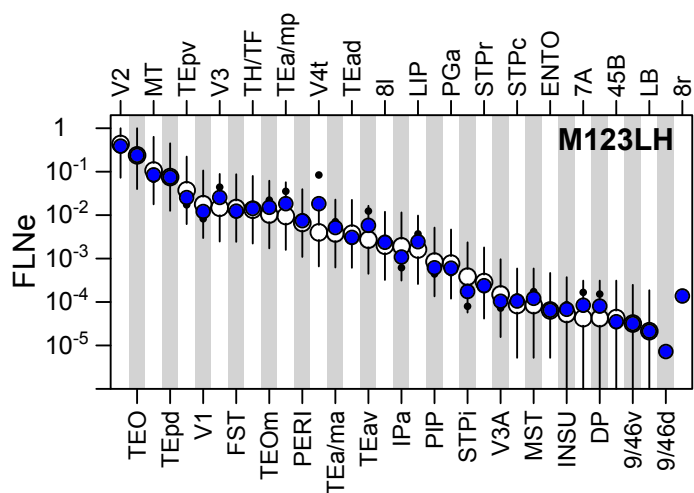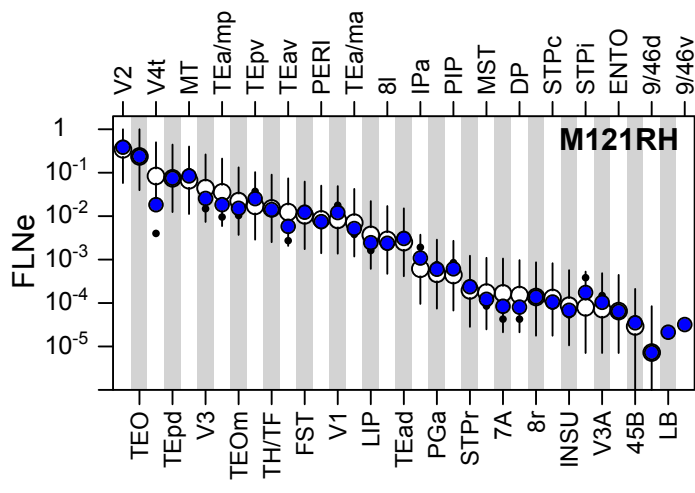

## Area 10

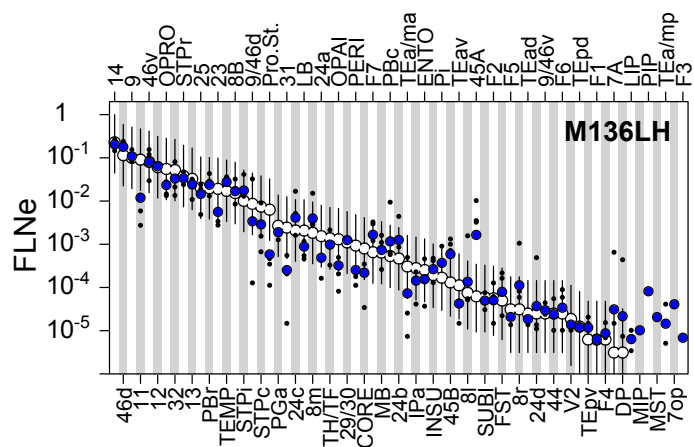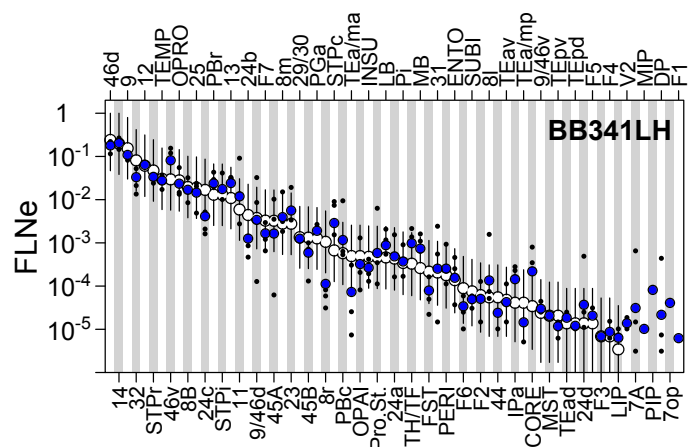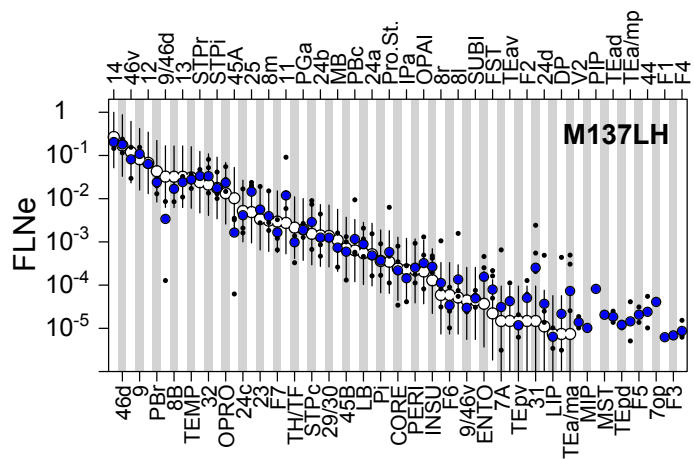

Figure S4 - Connectivity profiles to 23 target area

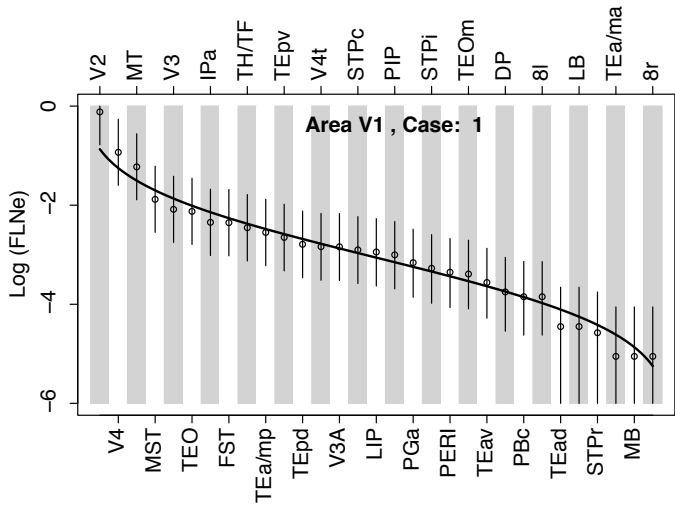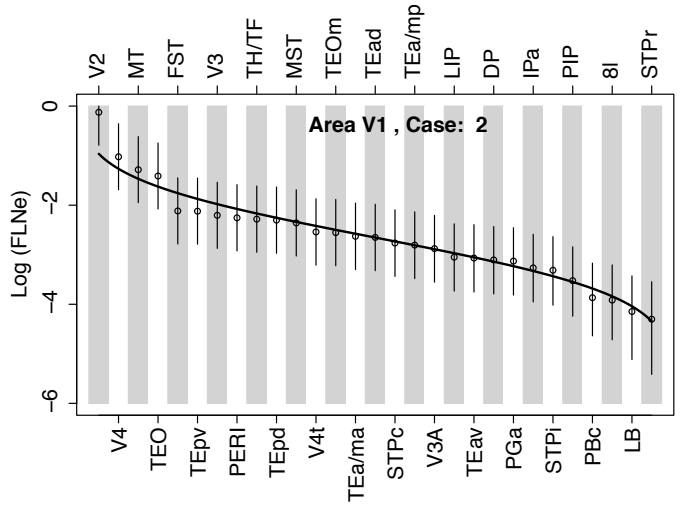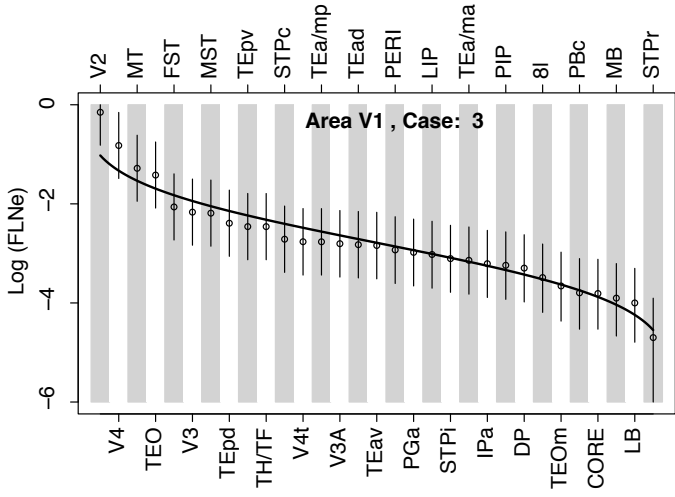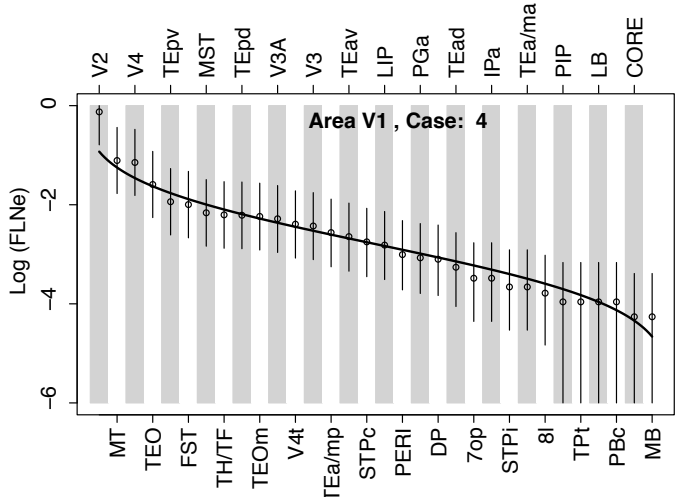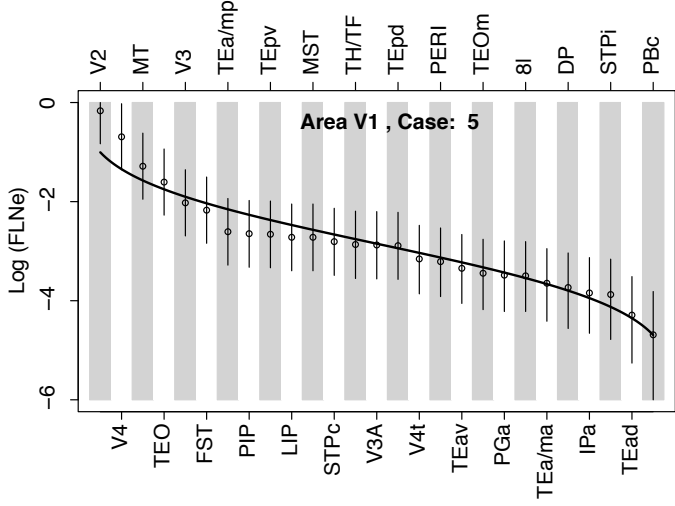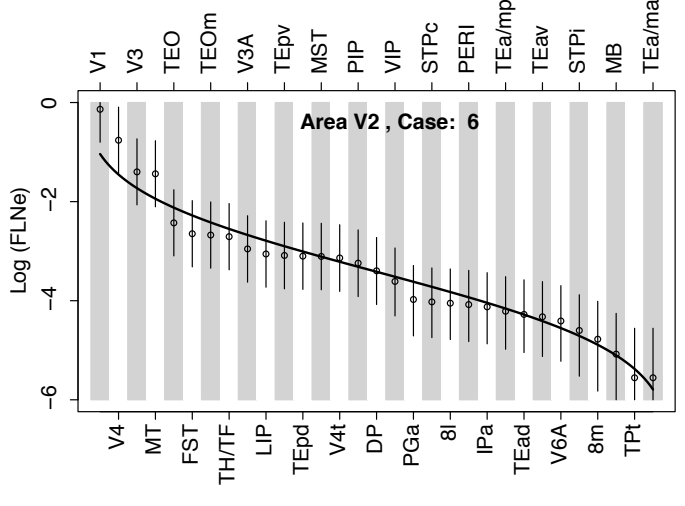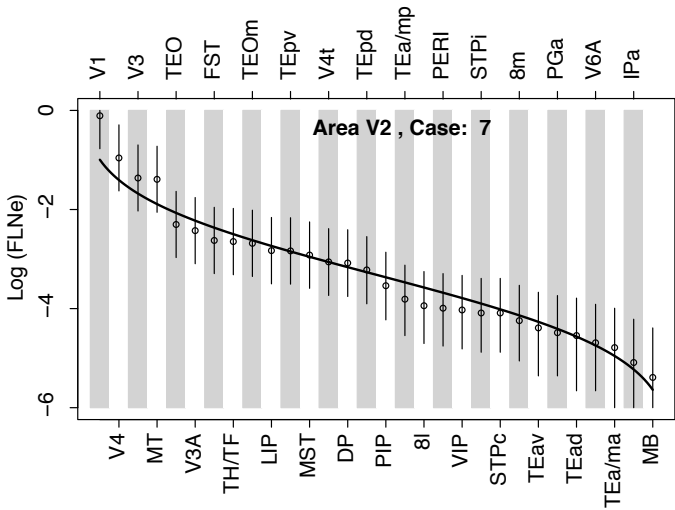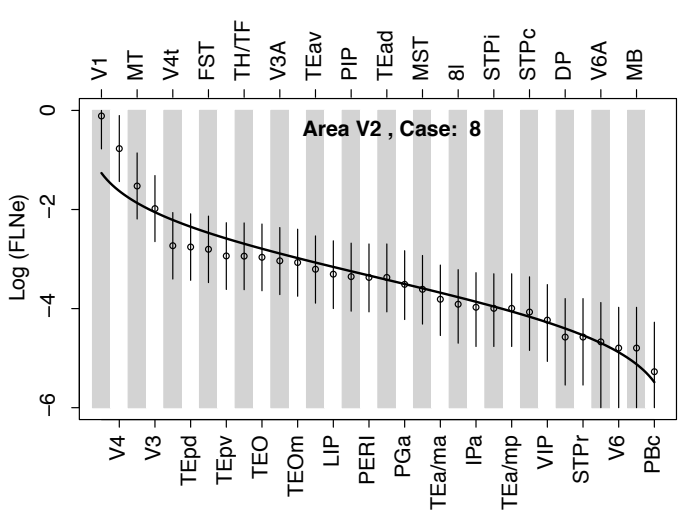



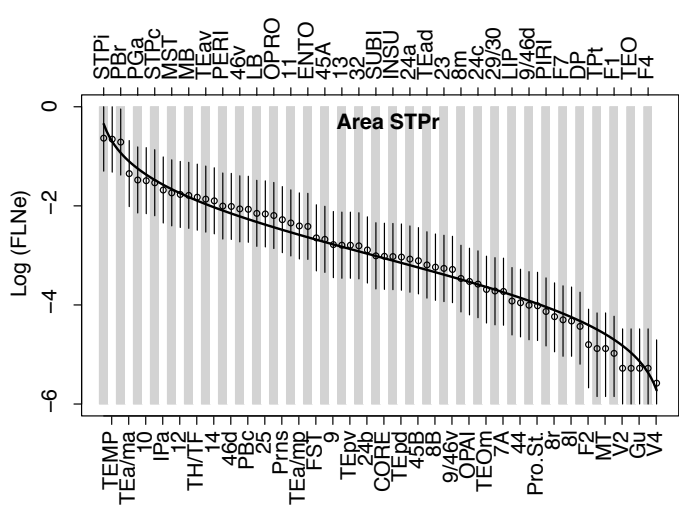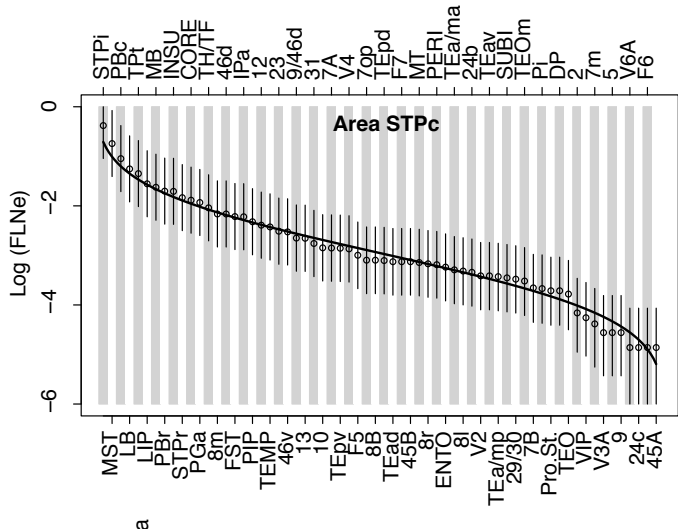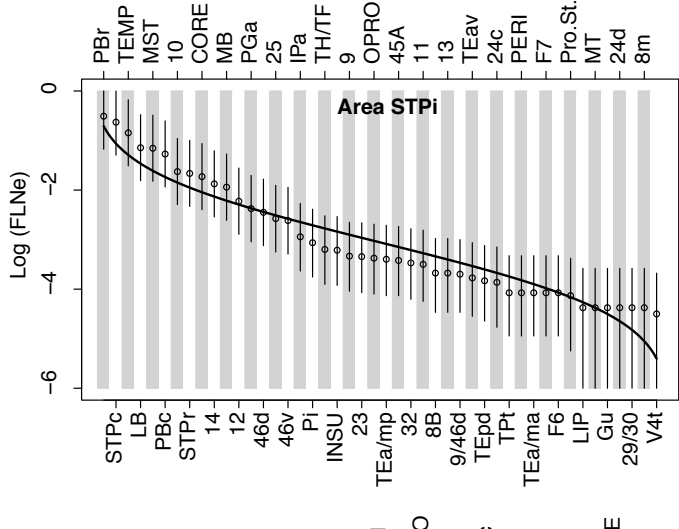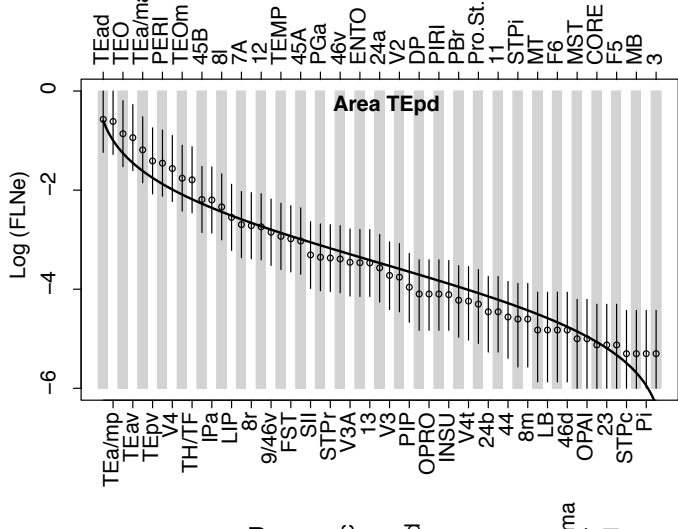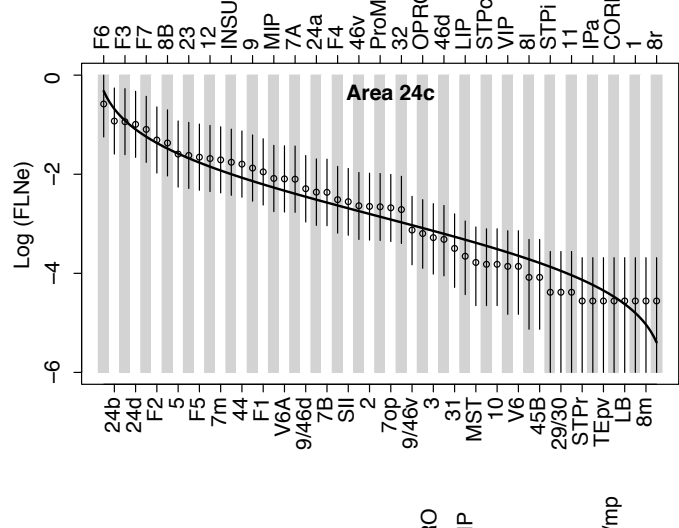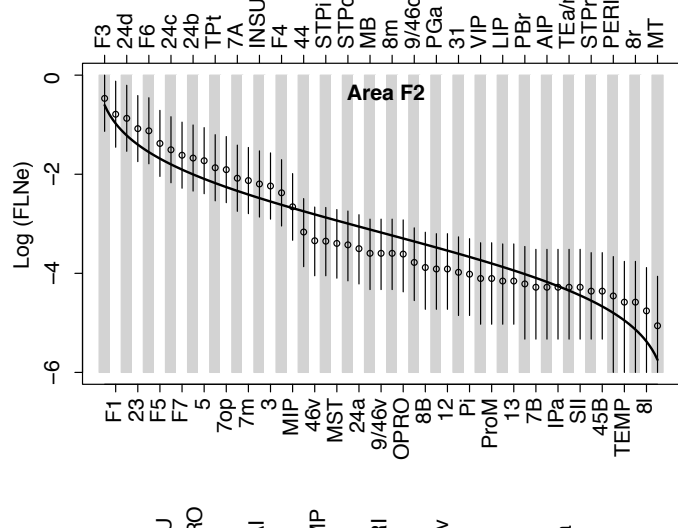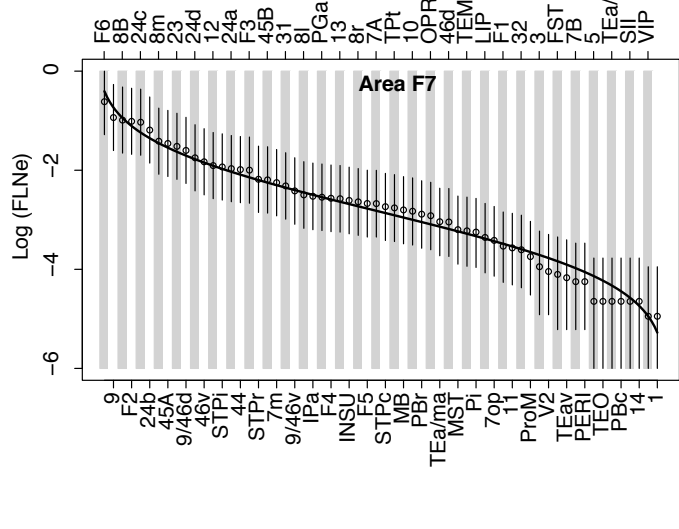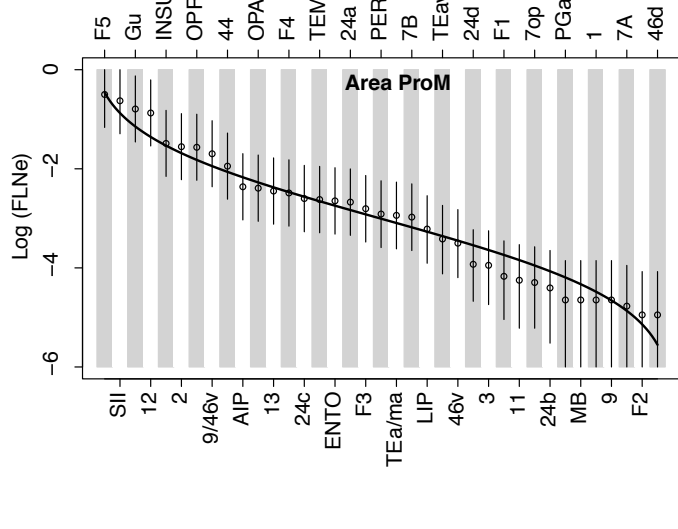



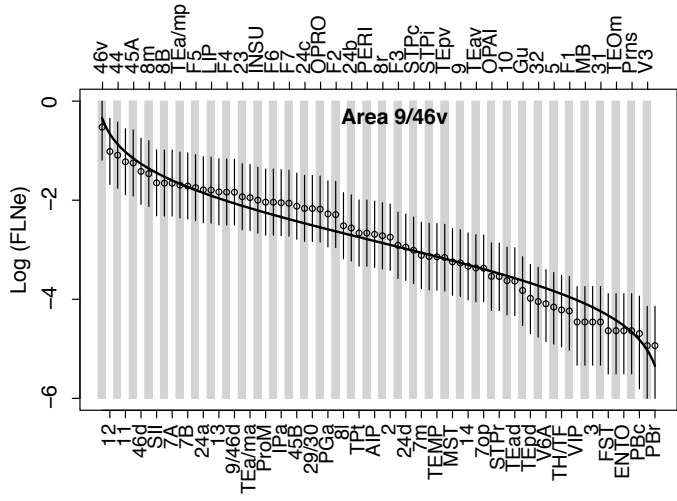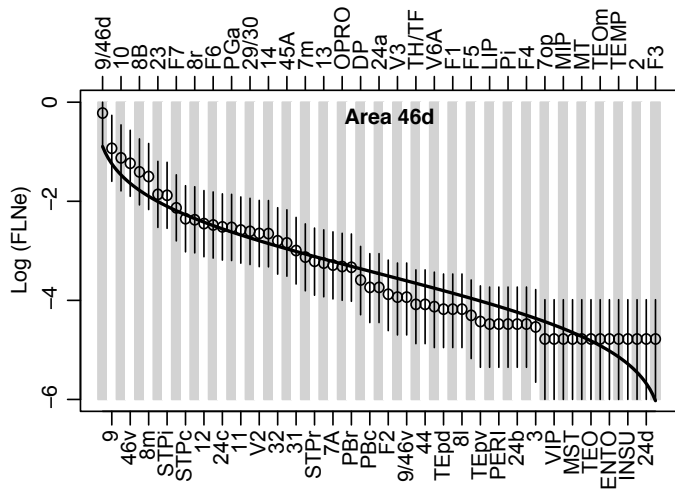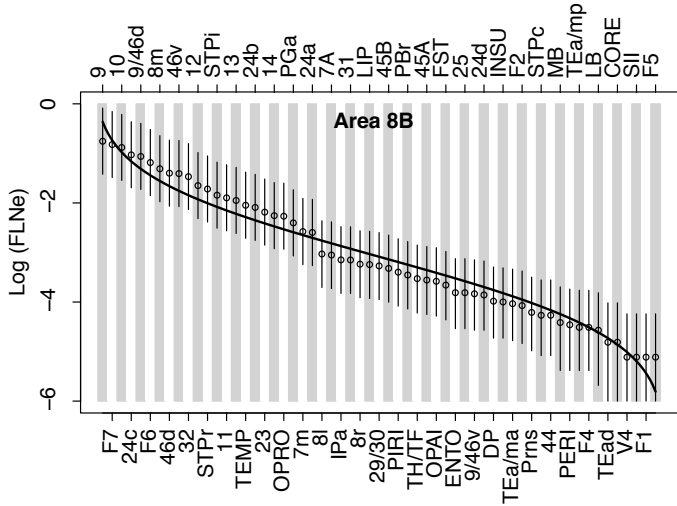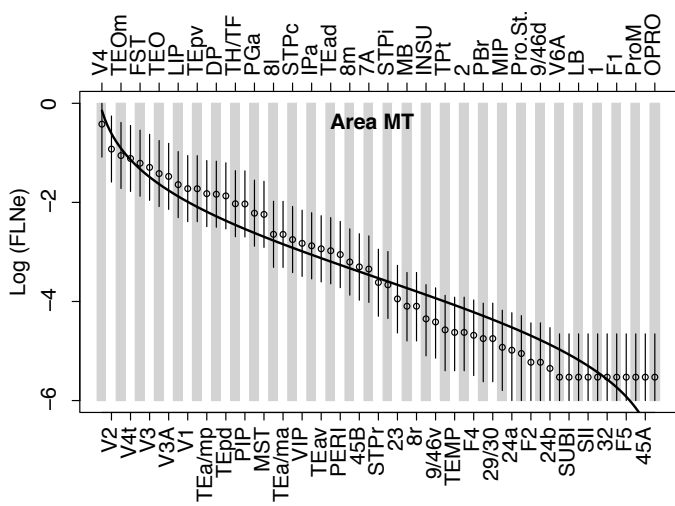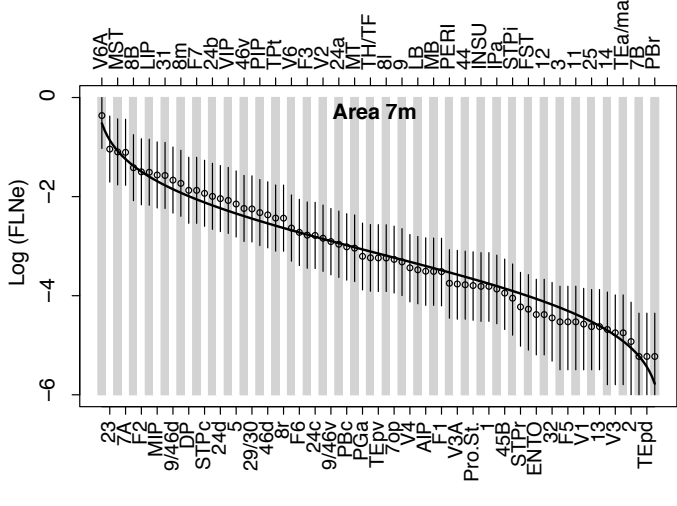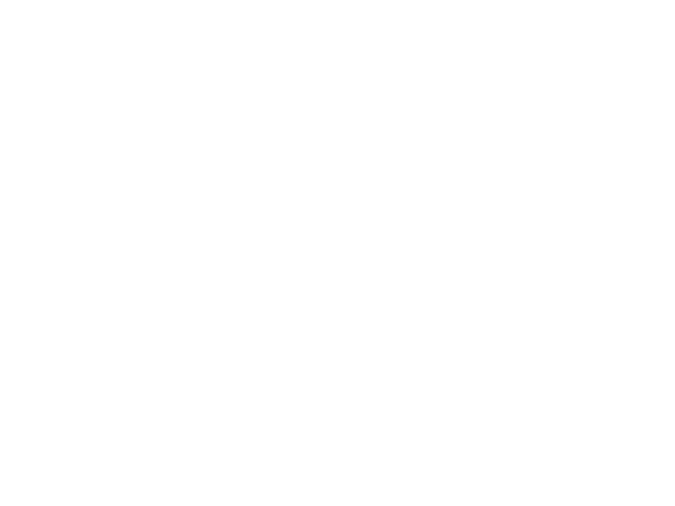

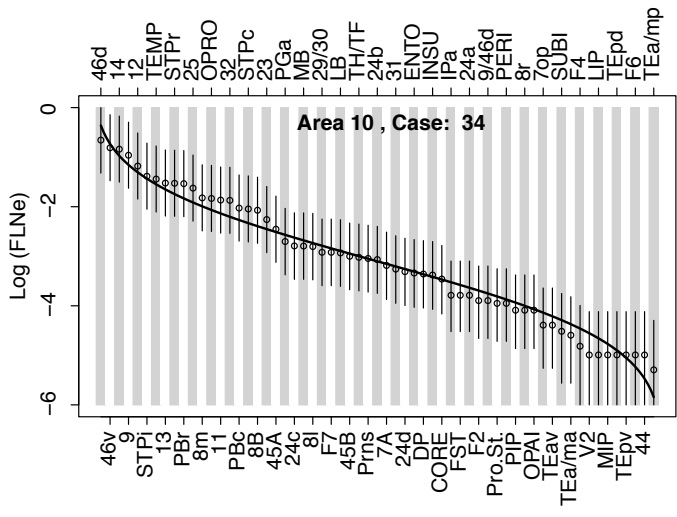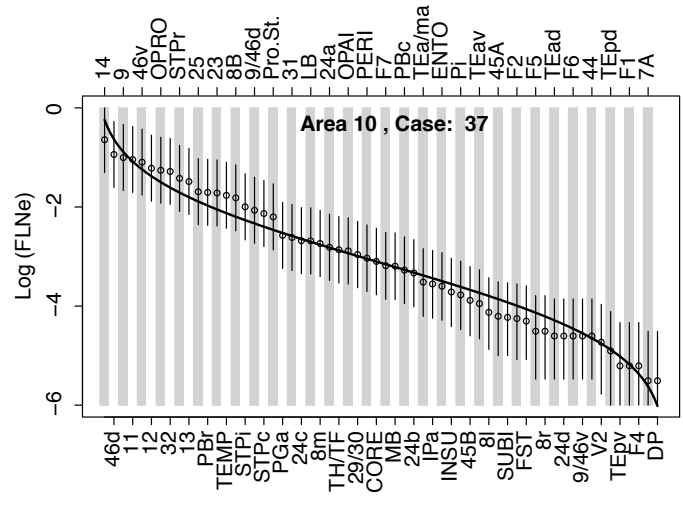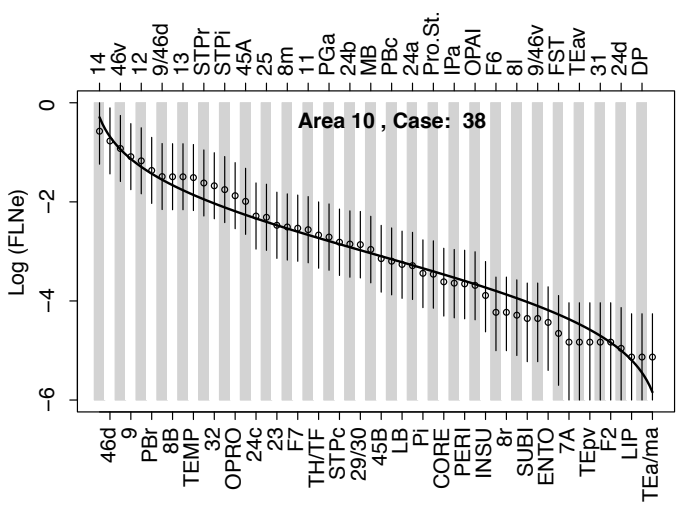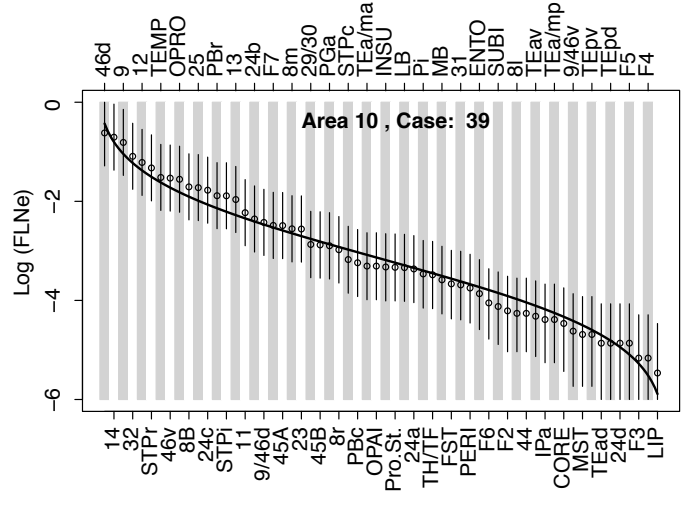

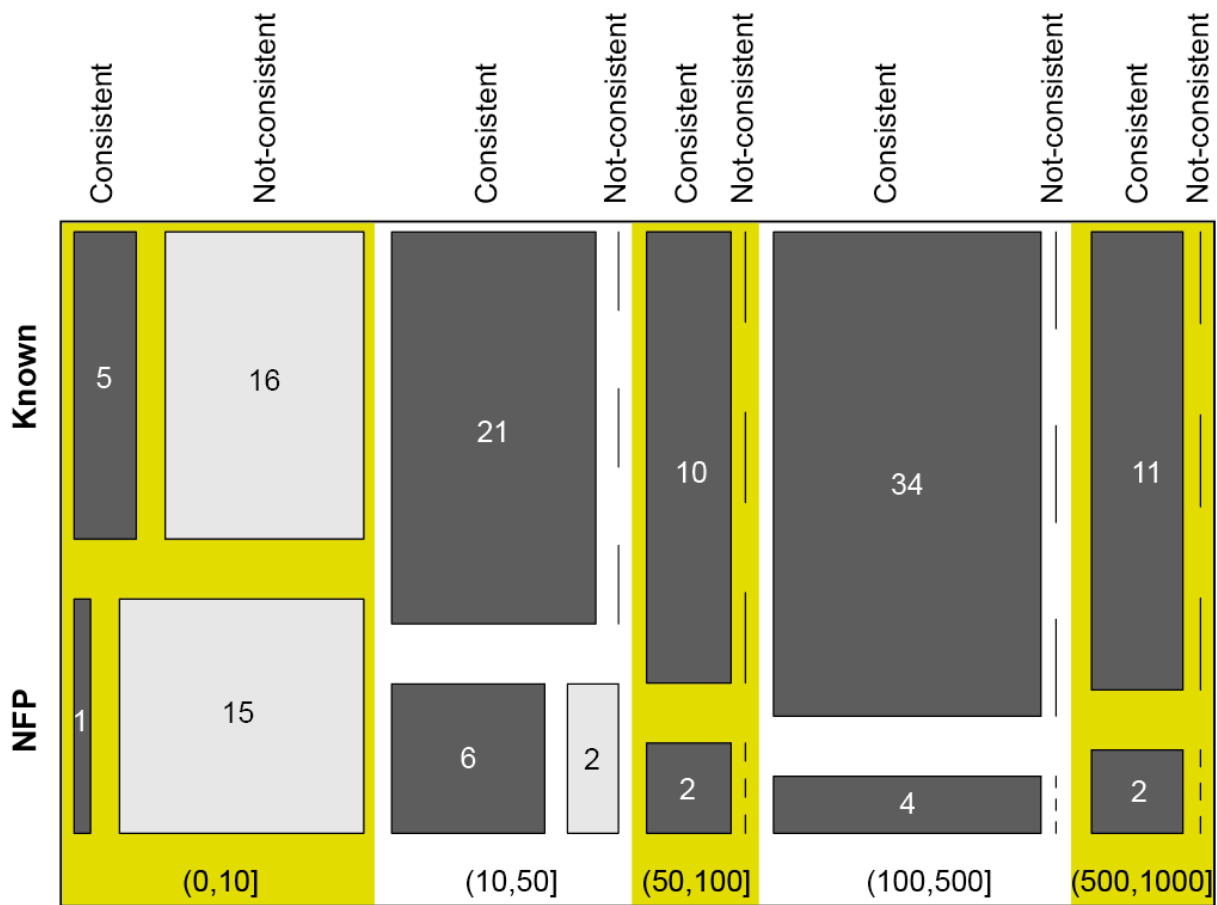

Figure S5 - Comparison of the consistency of newfound projections (NFP) and Known projections.

A mosaic plot (Friendly, 1994) illustrating the relative frequencies of Known and NFP for consistent and non-consistent projections as a function of the mean number of neurons for the injection sites at which multiple injections were performed (V1, V2, V4 and 10). For each range of counts, the blocks are arranged by consistent/Not-consistent (dark grey/light grey) and Known/NFP (upper/lower). The area of each block is proportional to the number areas of the given category. If no area falls within a given category, it is represented as a vertical dashed line. The numbers within indicate the actual number of areas. Globally these figure shows that at equal weights the consistency of NFP and known projections are similar.

Figure S6 - Injection sites in 29 injections

### Case 1: M081LH

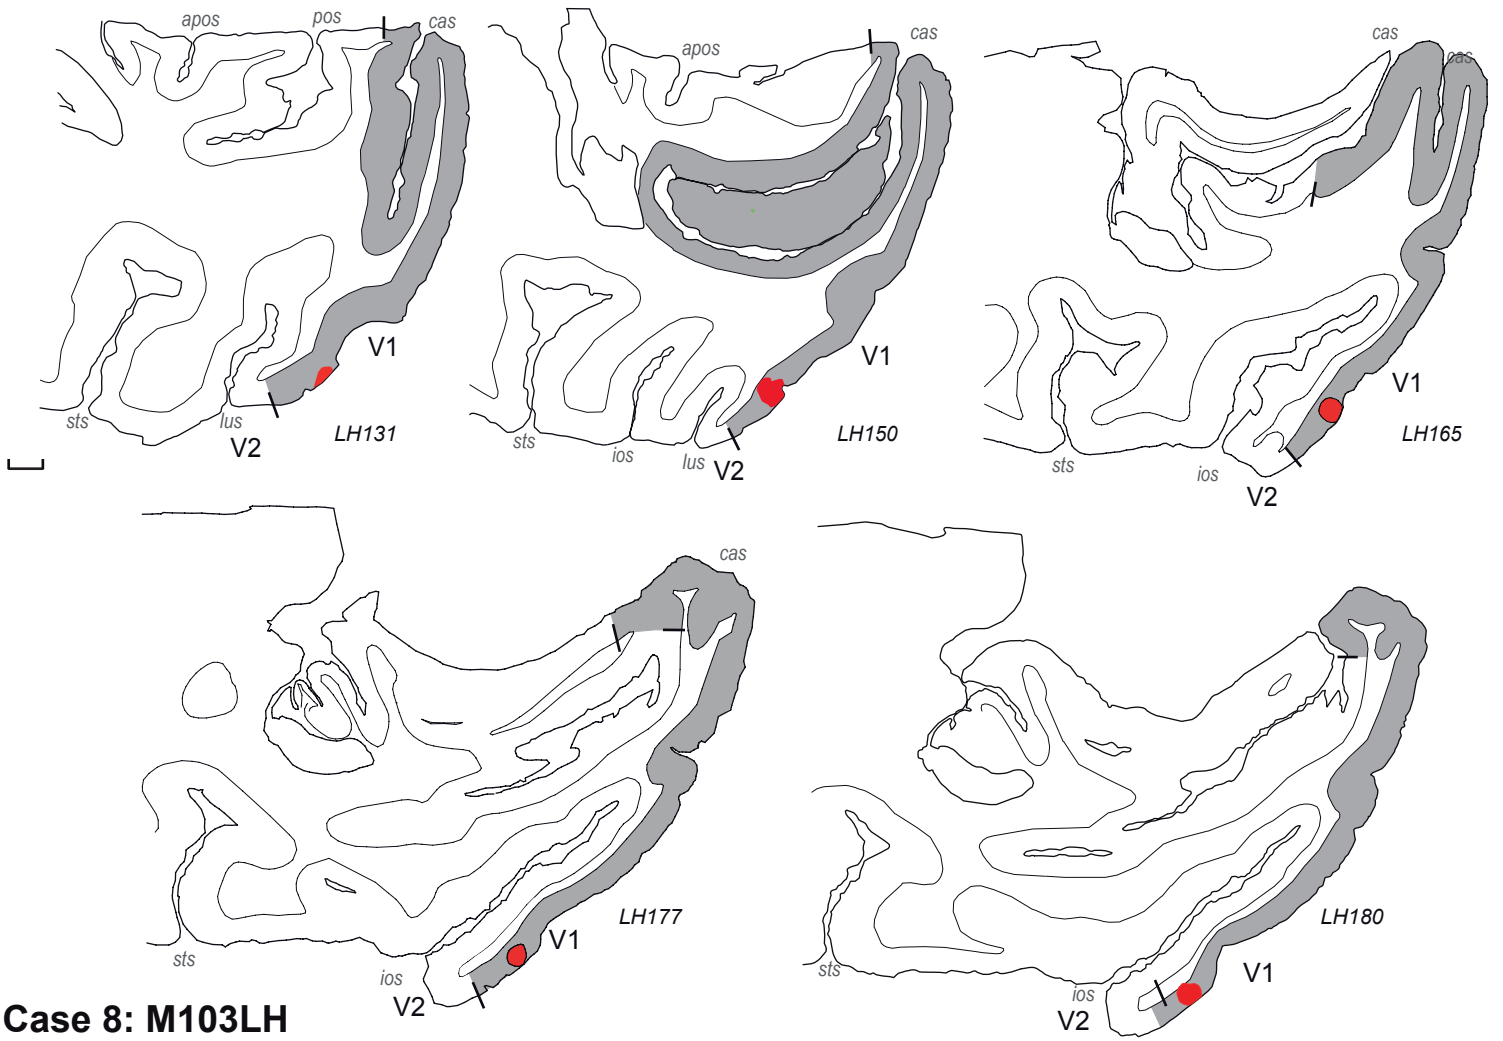

### Case 8: M103LH

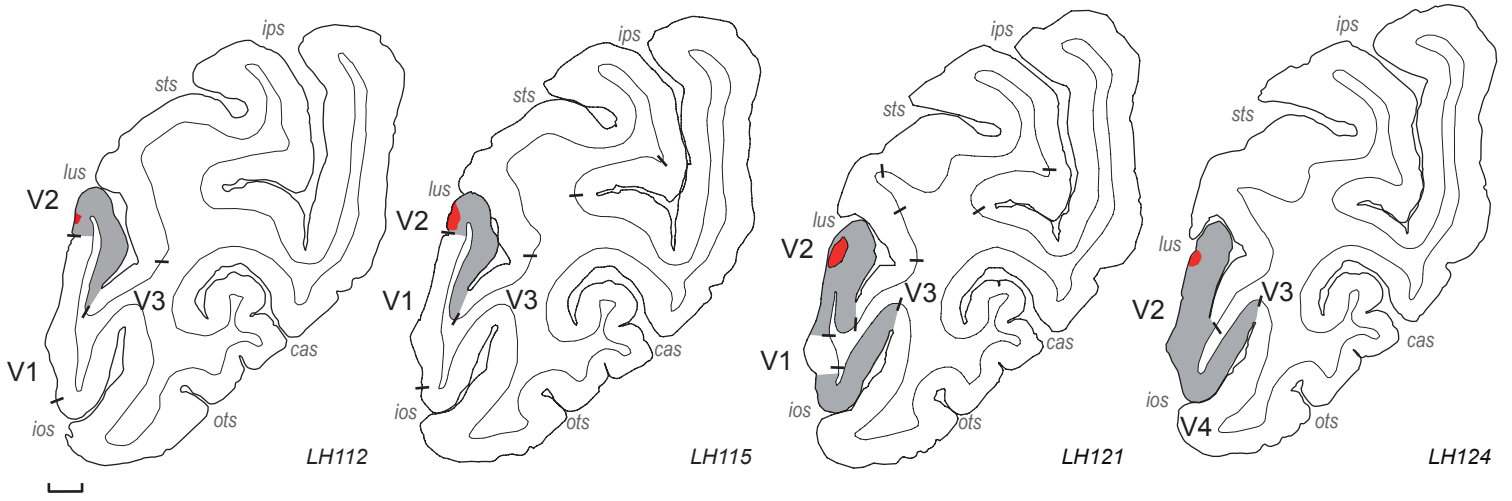

### Case 9: M121RH

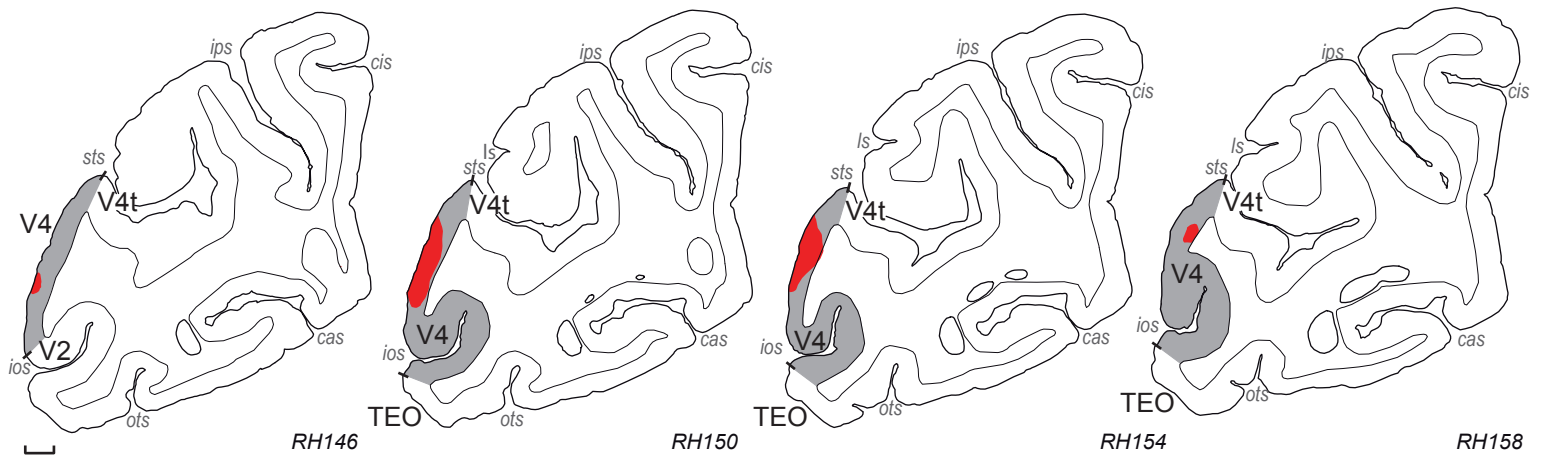

### Case 11: M119LH

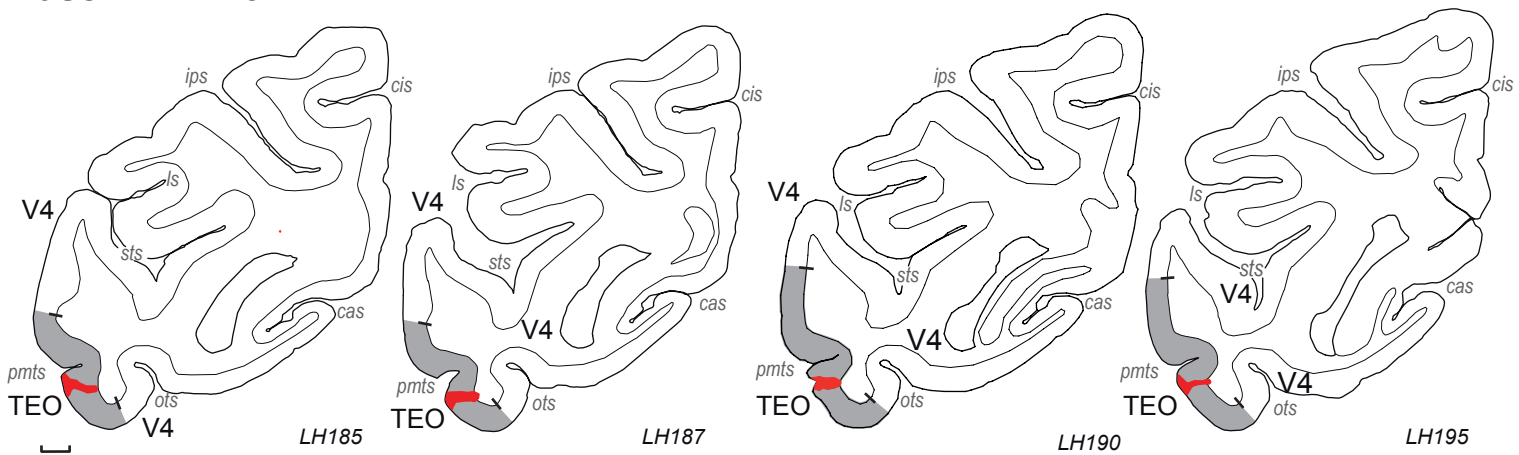

### Case 12: M106LH

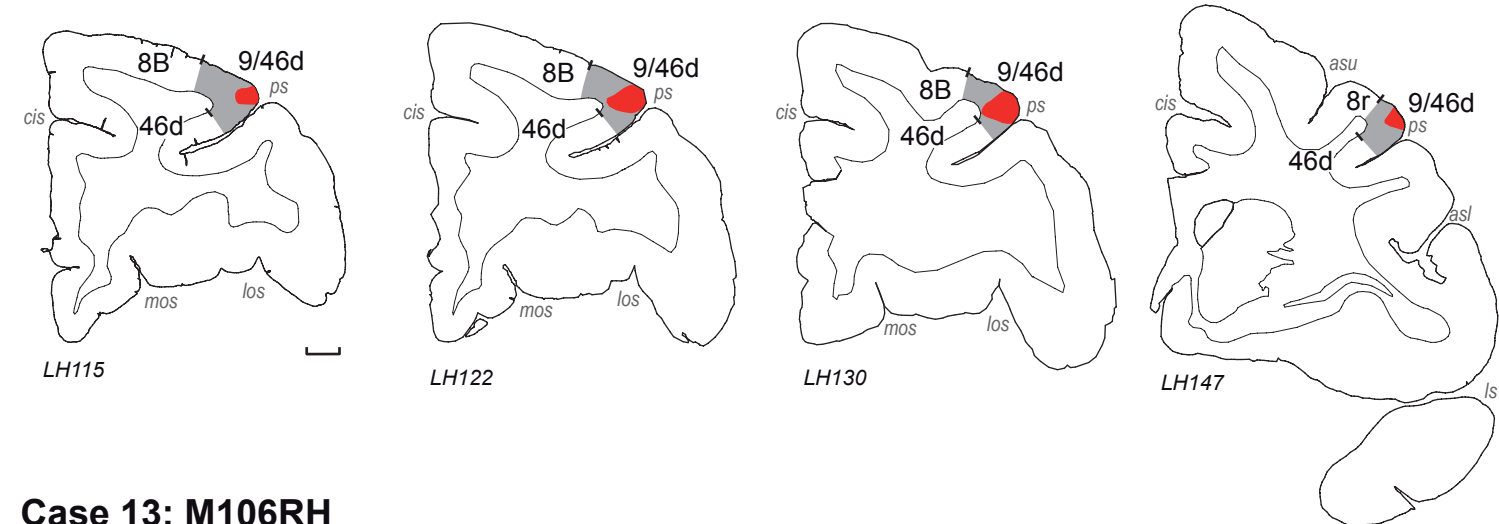

### Case 13: M106RH

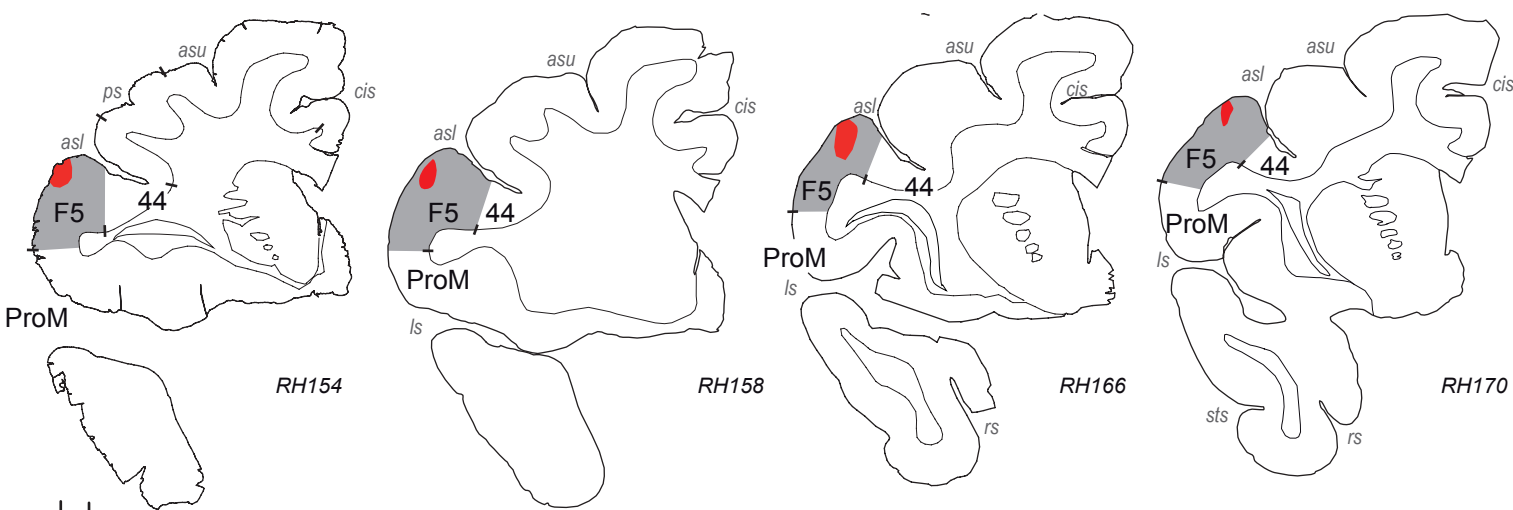

### Case 14: BB272LH

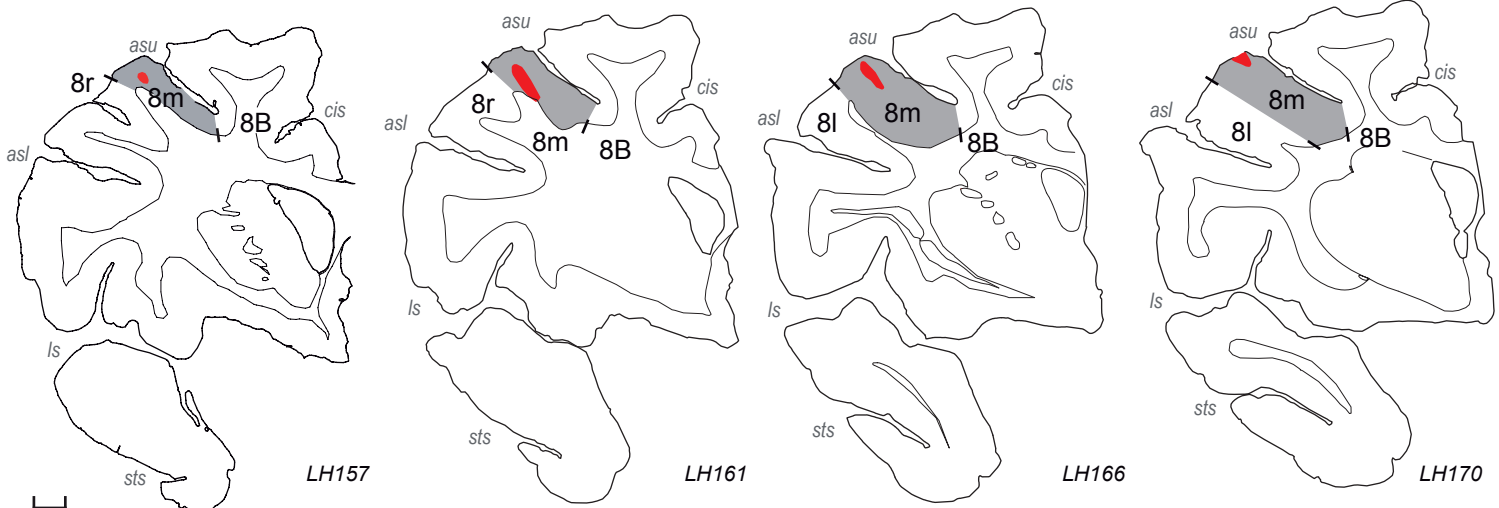

### Case 15: BB135LH

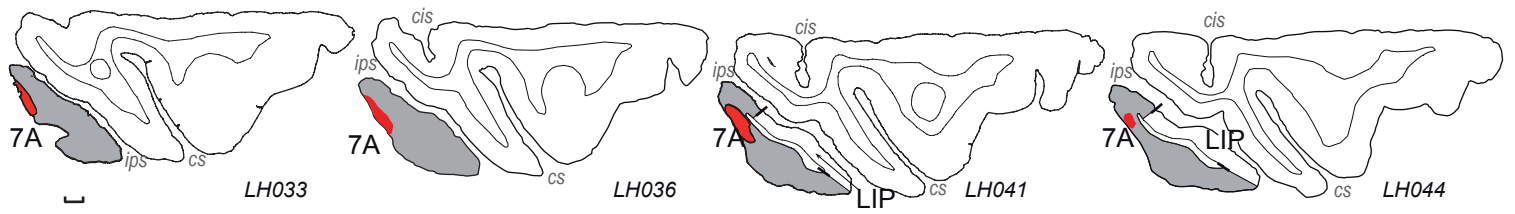

### Case 16: M089LH

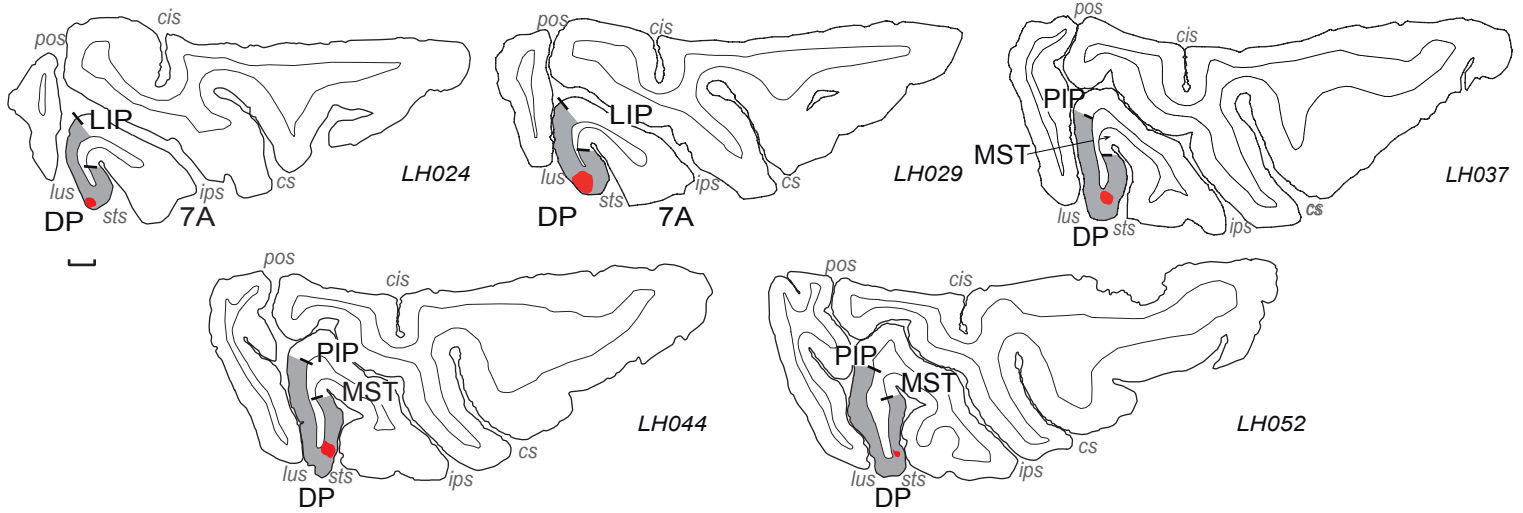

### Case 17: M098LH

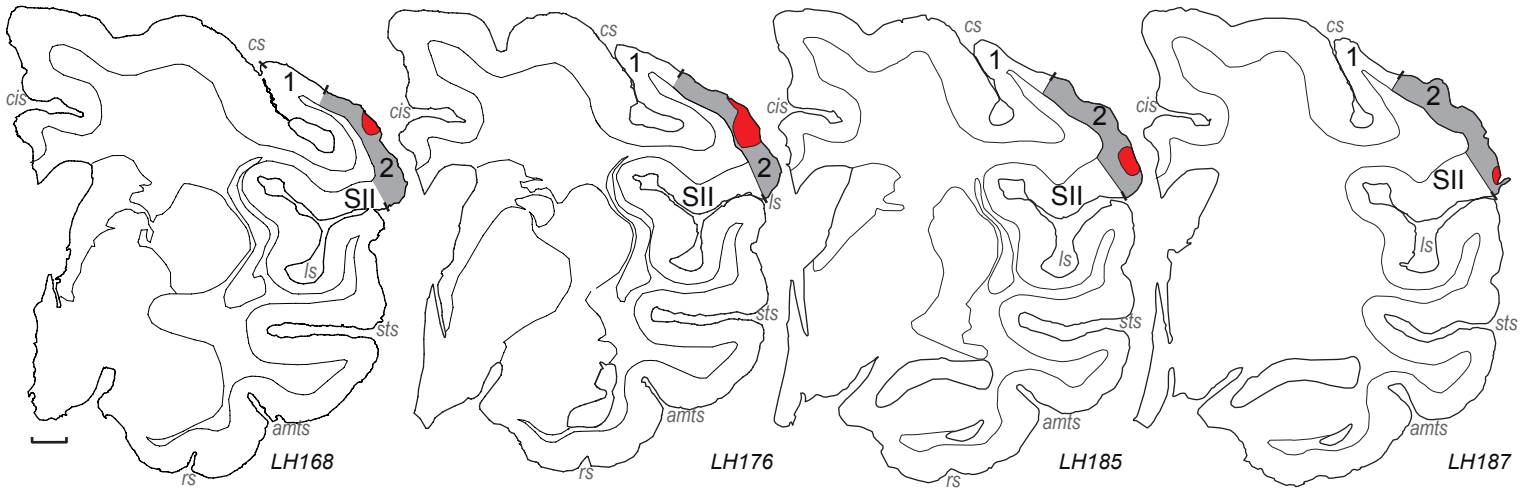

### Case 18: M070LH

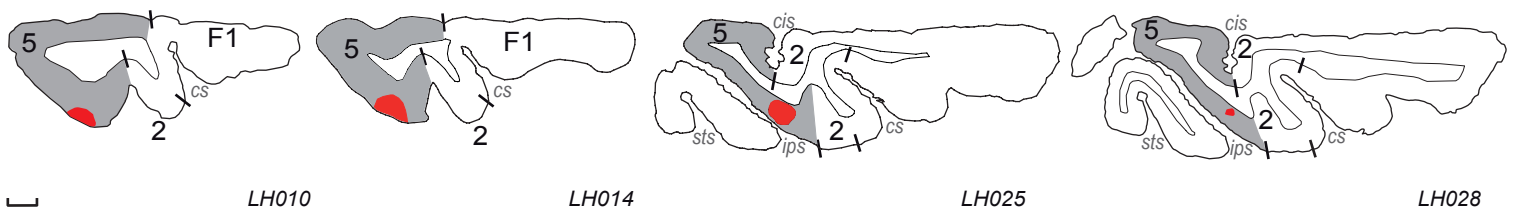



## Case 19: M068LH

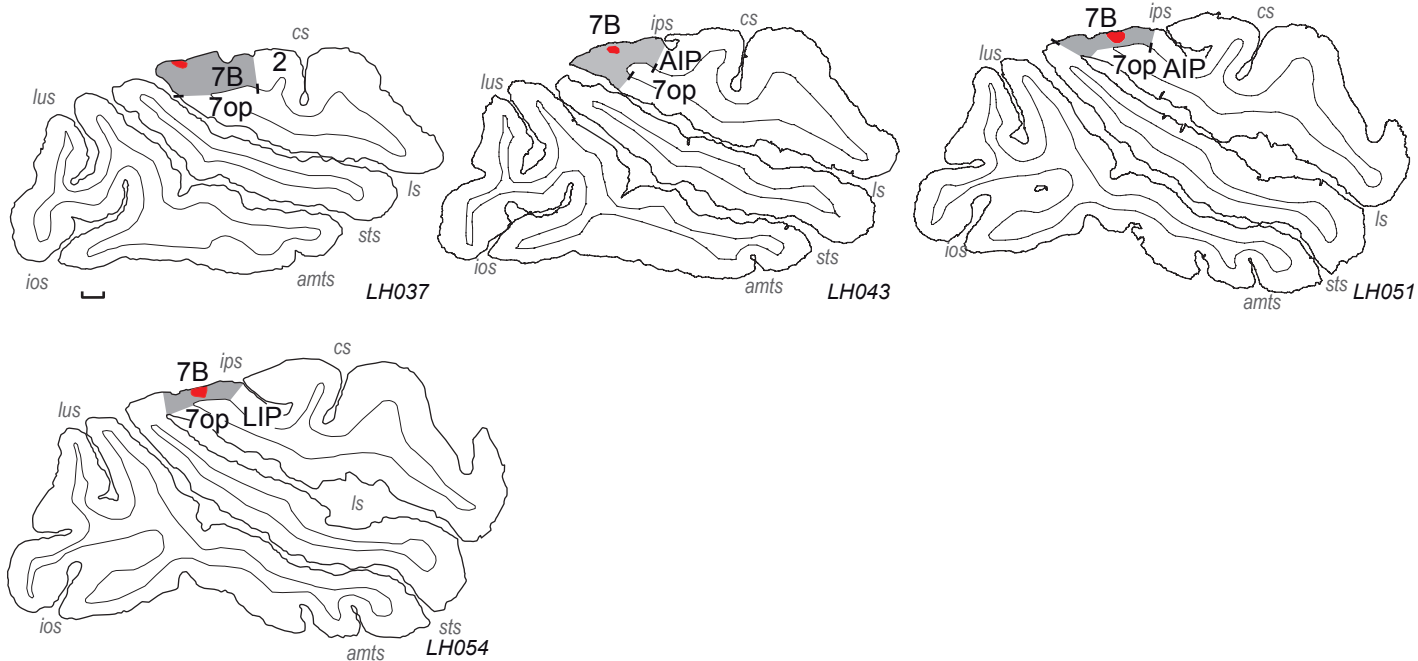

## Case 20: BB289LH

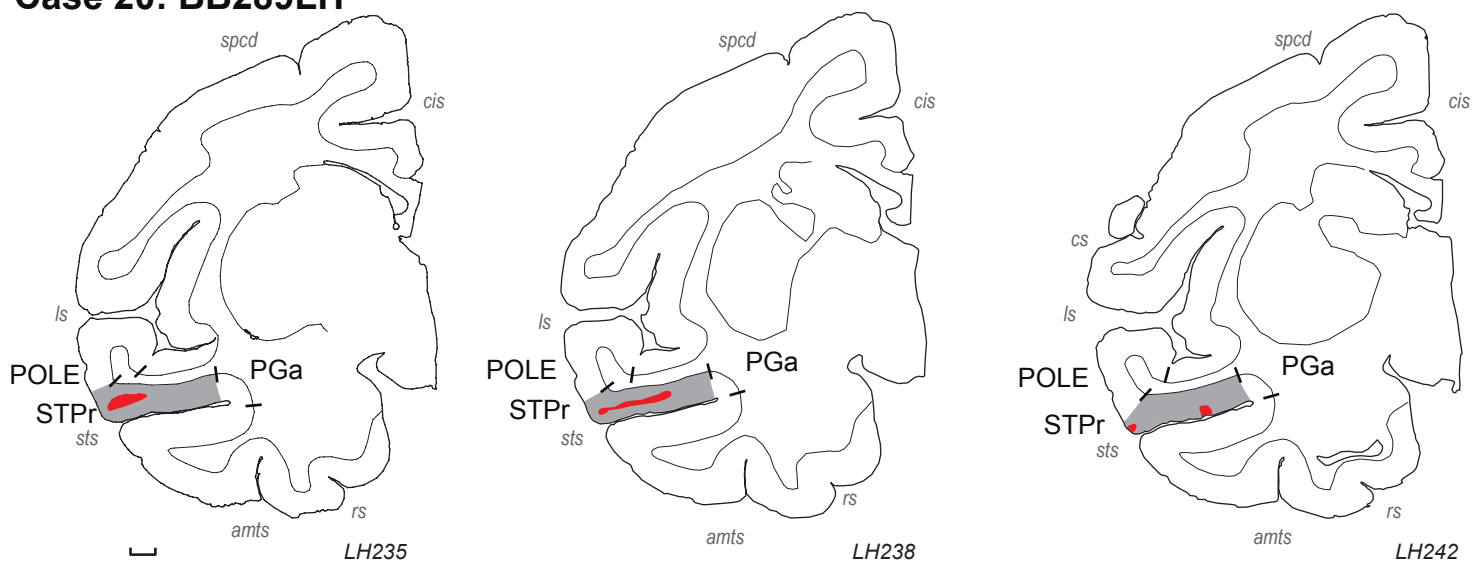

## Case 21: BB289LH

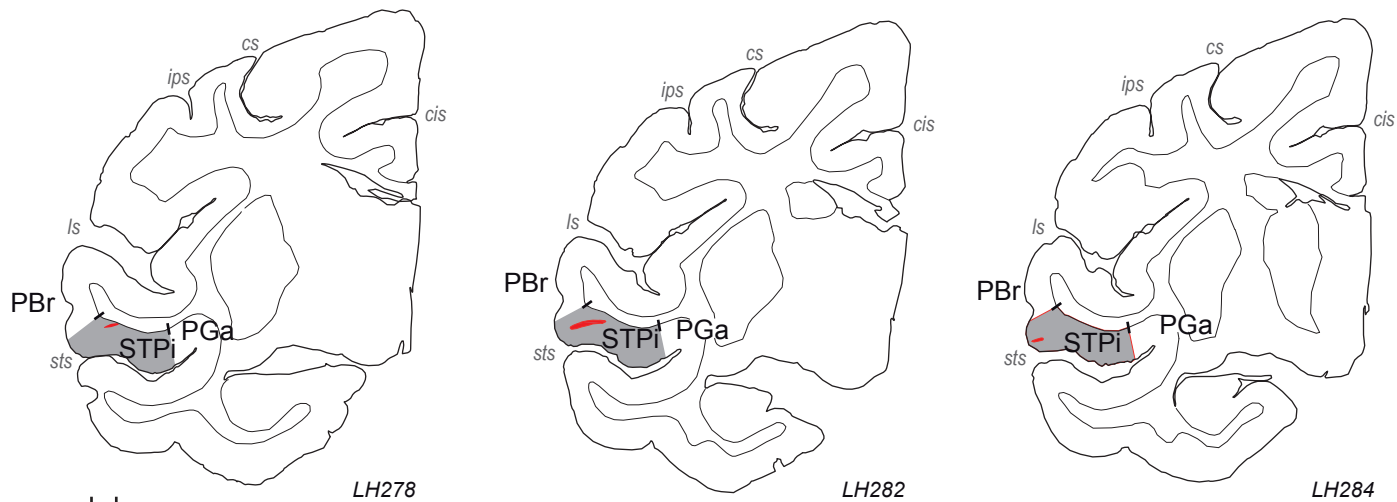

### Case 22: M090RH

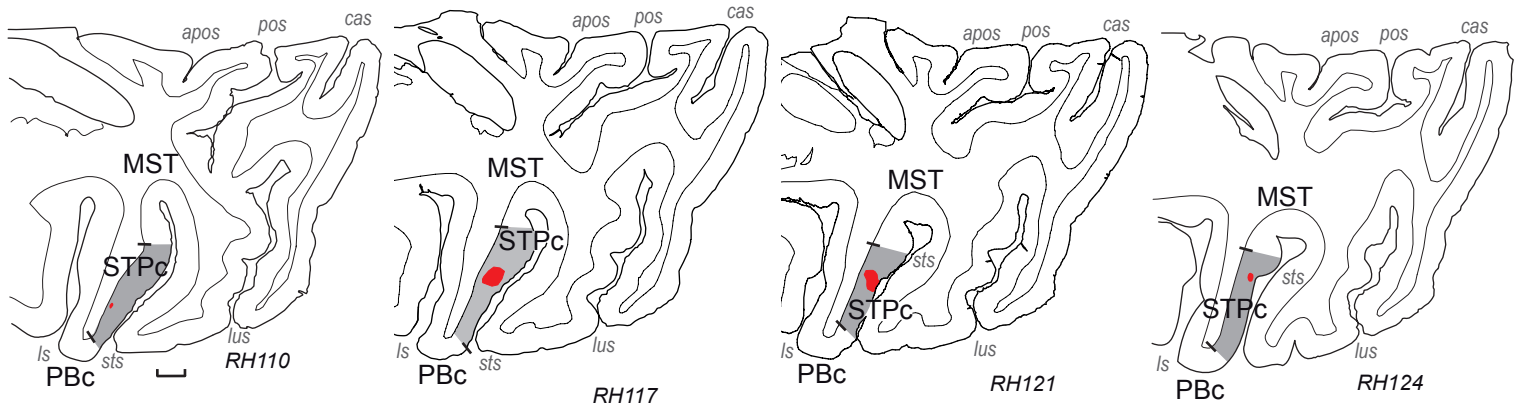

### Case 23: M108LH

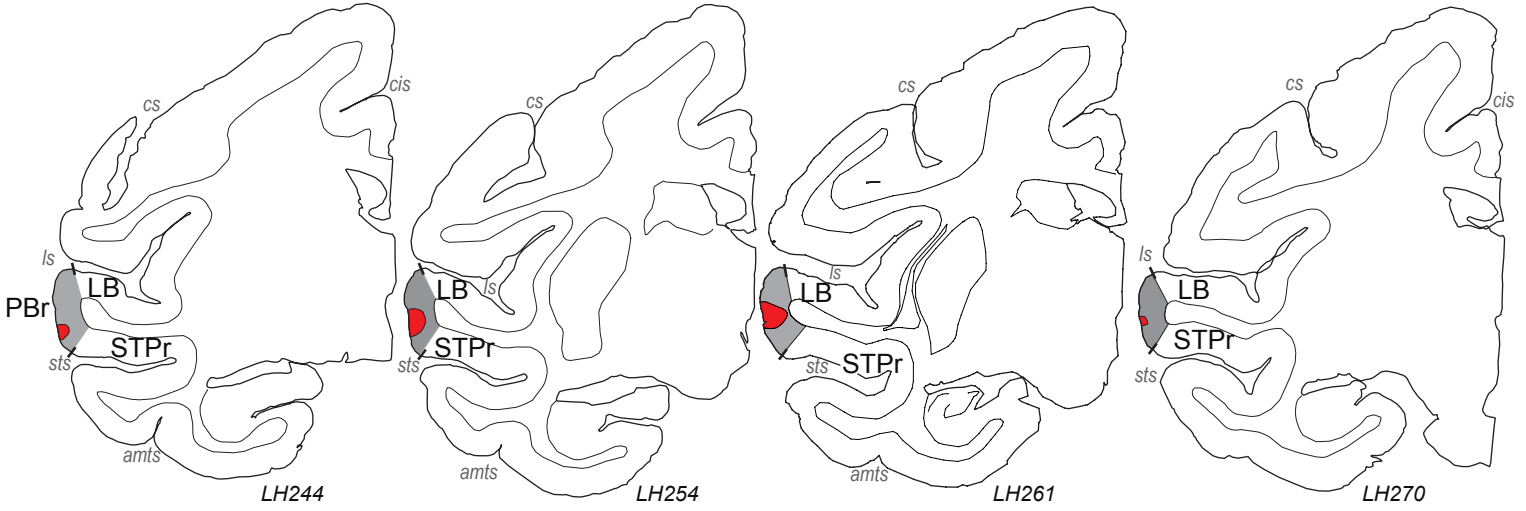

### Case 24: M128LH

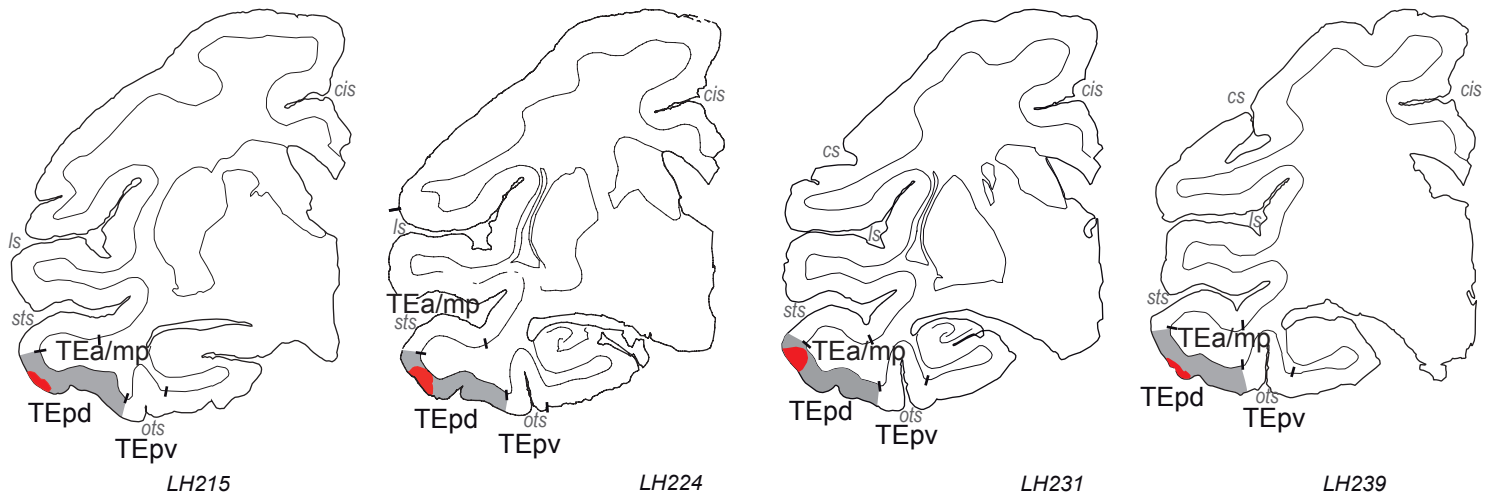

### Case 25: NICO RH

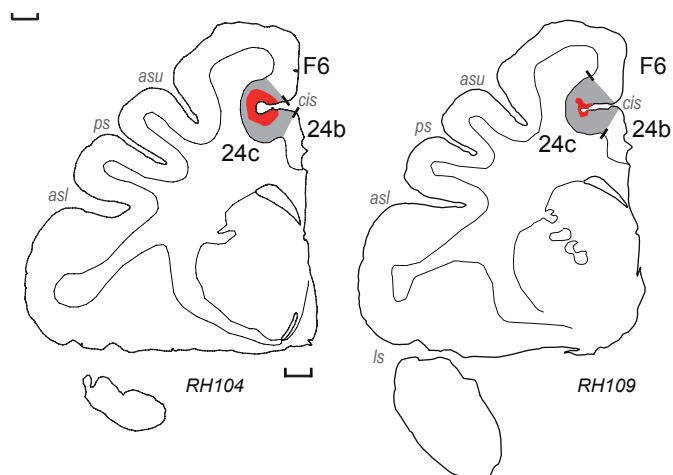

### Case 26: M069LH

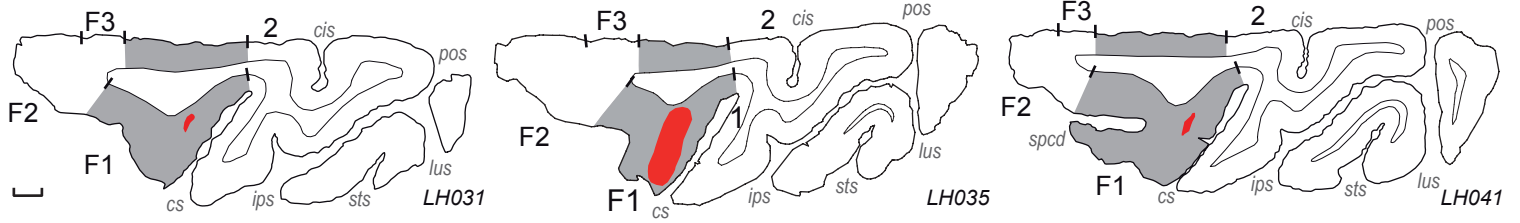

### Case 27: M102LH

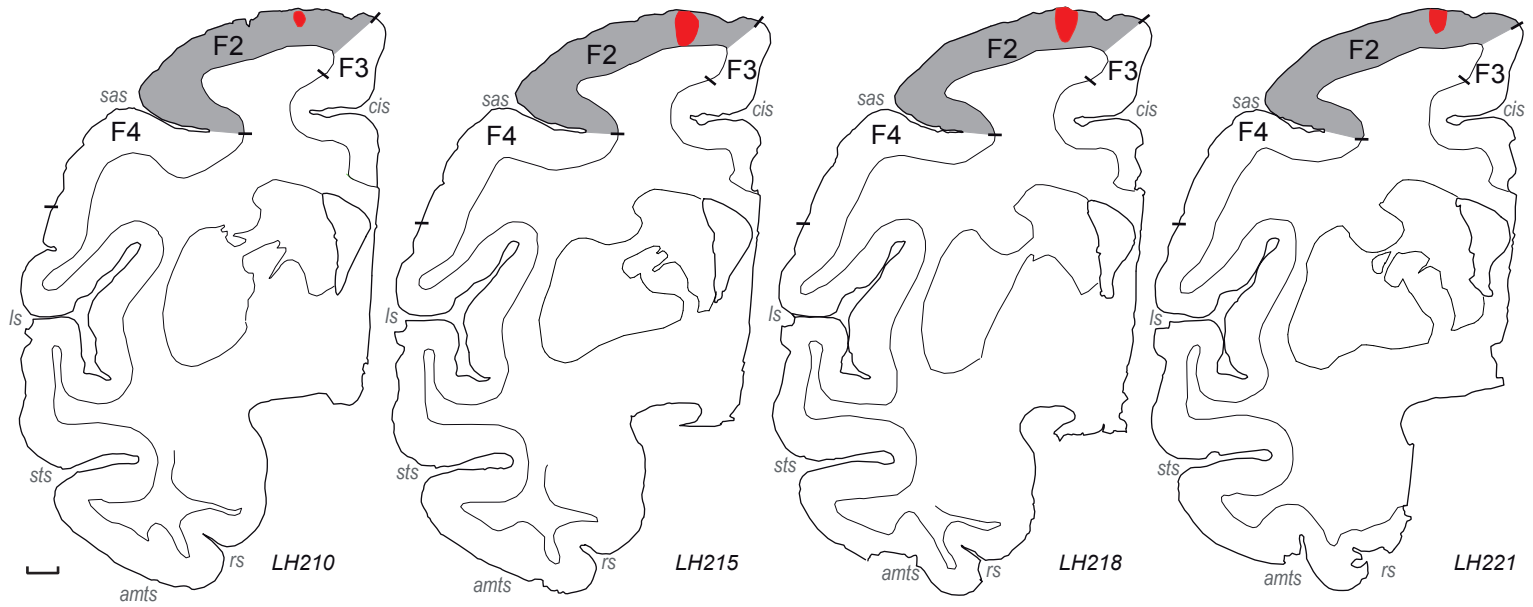

### Case 28: M102LH

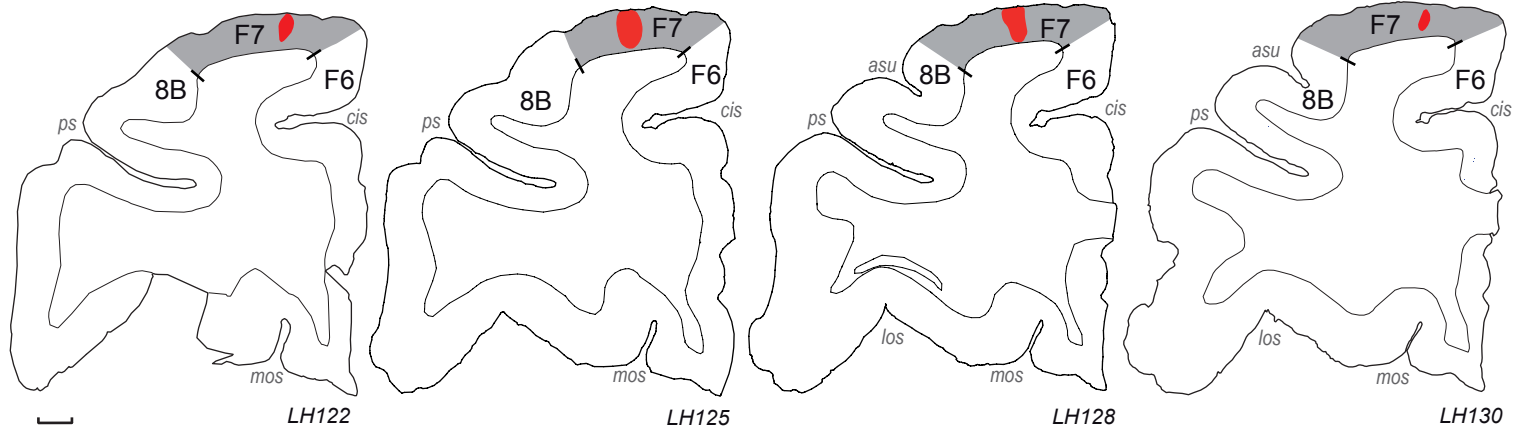

### Case 29: M098LH

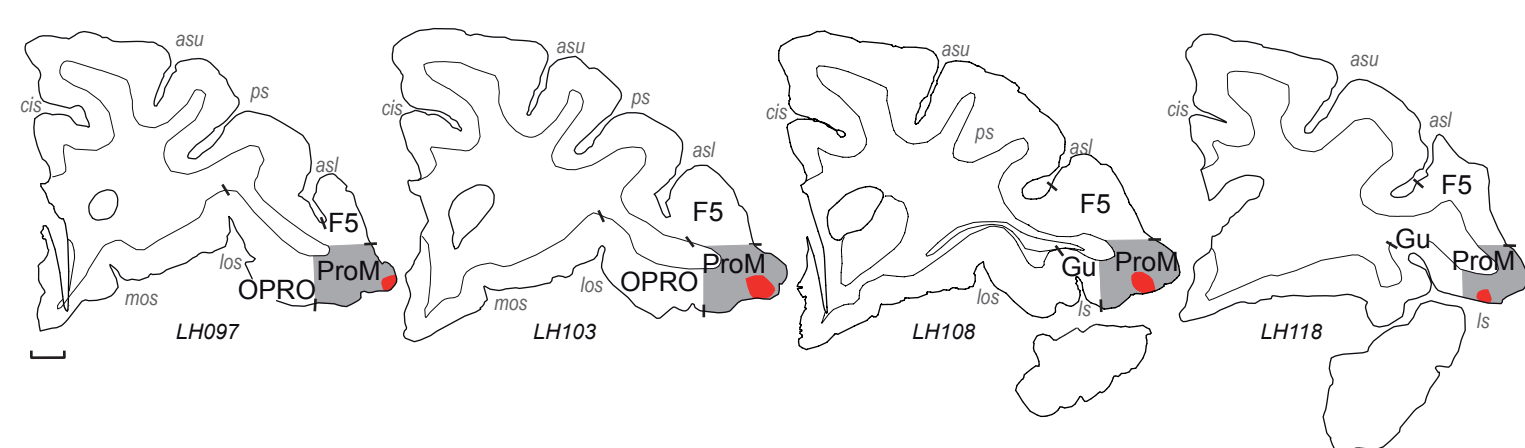

### Case 30: BB272RH

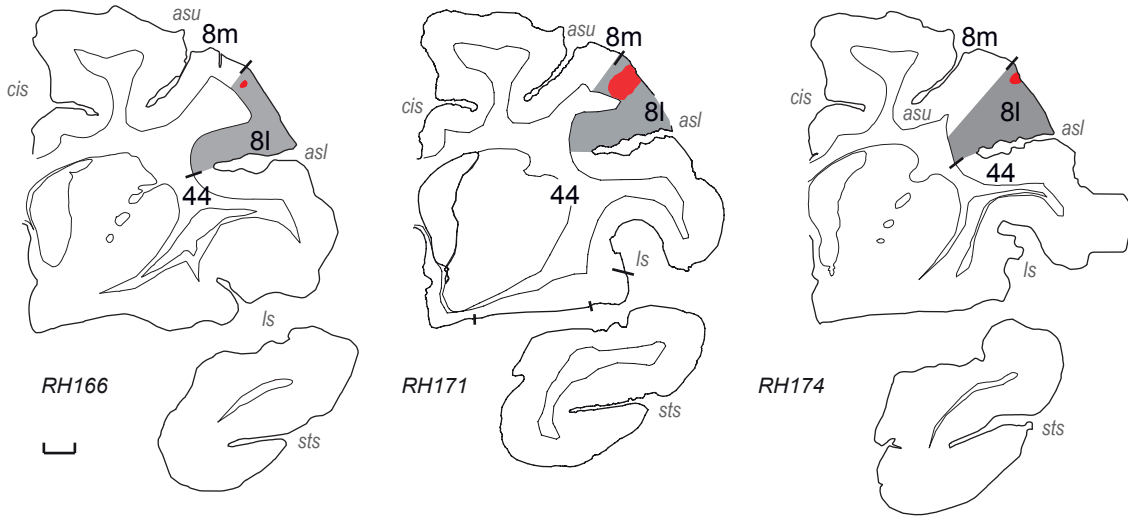

### Case 31: M116RH

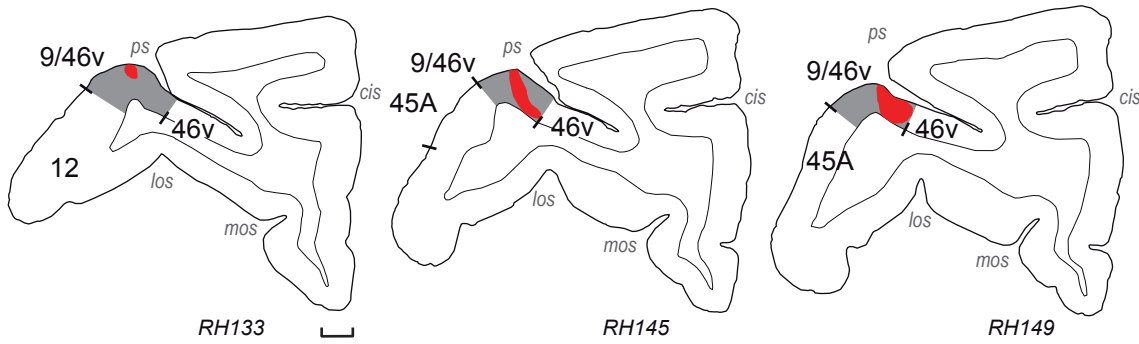

### Case 32: M116RH

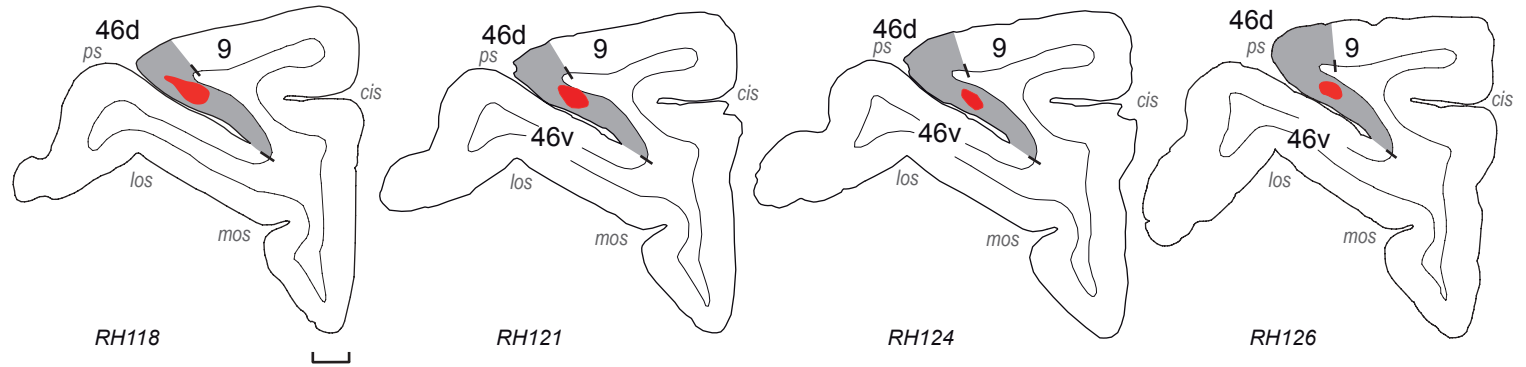

### Case 33: M128LH

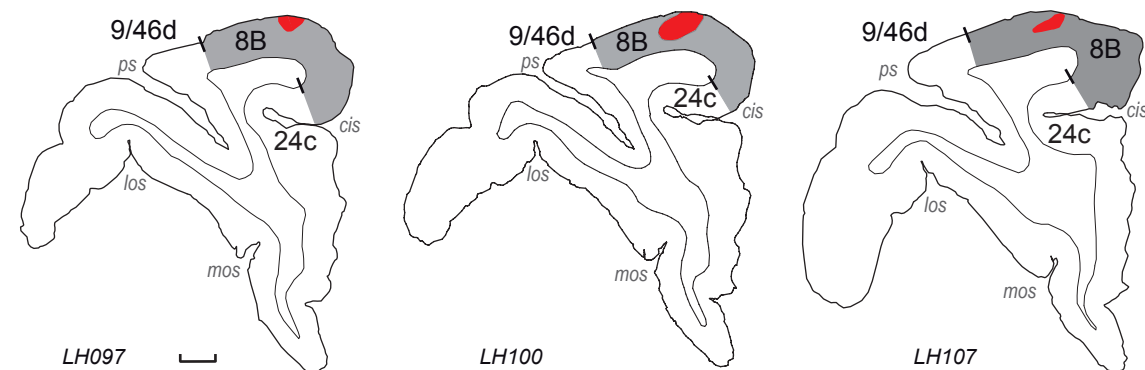

### Case 34 : M131LH

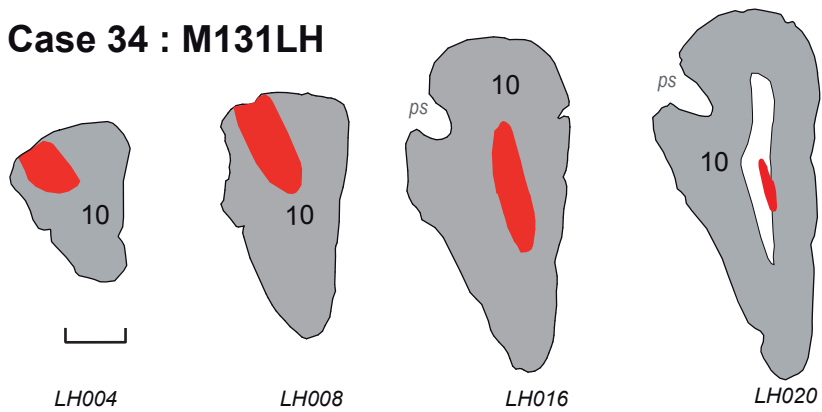

### Case 35 : M133LH

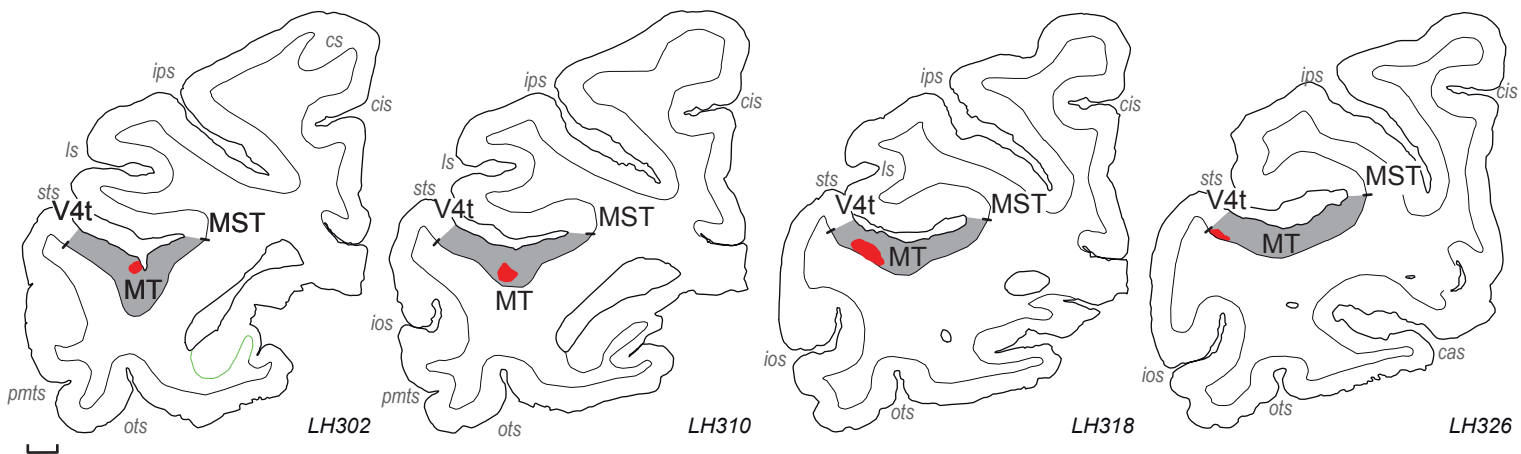

### Case 36 : M136LH

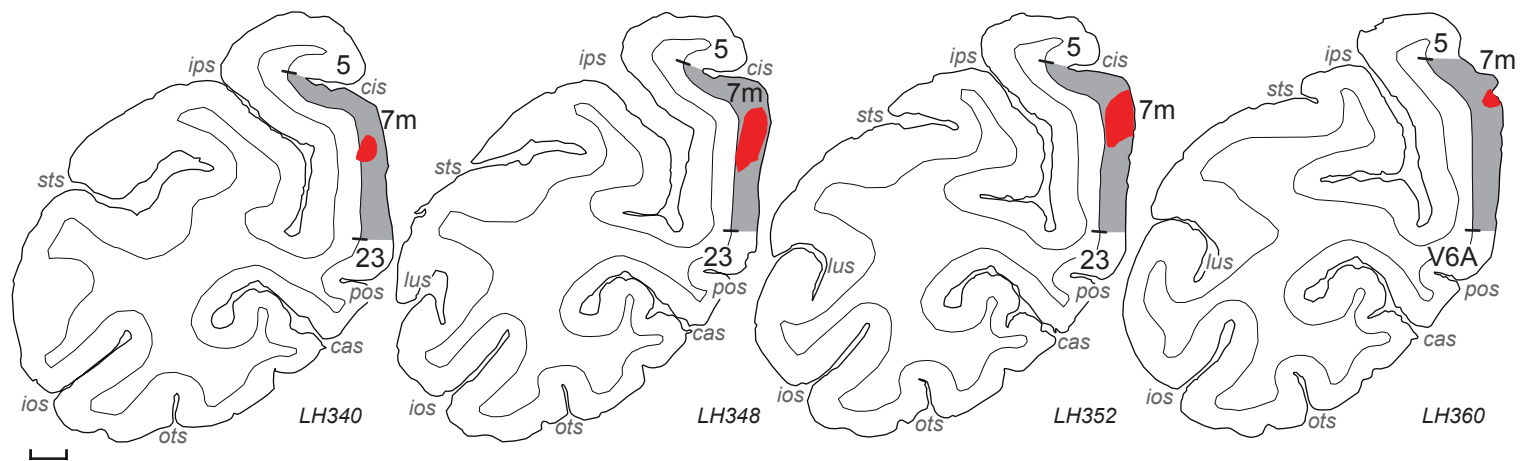

Figure S7 - Atlas

*The atlas uses one section in four of the sections retained for examination of retrograde labelling (see methods)*

# ATLAS MACAQUE CYNOMOLGUS

(macaca fascicularis)

CORONAL  
1/4

Insert U846

## Index of abbreviations

### Areas

|       |                                    |              |
|-------|------------------------------------|--------------|
| 1     | somatosensory area 1               | Fig. 51 - 79 |
| 2     | somatosensory area 2               | Fig. 41 - 83 |
| 3     | somatosensory area 3               | Fig. 41 - 75 |
| 5     | somatosensory area 5               | Fig. 62 - 92 |
| 7A    | area 7A                            | Fig. 72 - 91 |
| 7B    | area 7B                            | Fig. 62 - 71 |
| 7m    | area 7m                            | Fig. 73 - 90 |
| 7op   | area 7op (parietal operculum)      | Fig. 63 - 76 |
| 8B    | area 8B                            | Fig. 18 - 40 |
| 8l    | lateral part of area 8             | Fig. 27 - 40 |
| 8m    | medial part of area 8              | Fig. 27 - 42 |
| 8r    | rostral part of area 8             | Fig. 25 - 36 |
| 9     | area 9                             | Fig. 10 - 20 |
| 9/46d | area 9/46, dorsal part             | Fig. 16 - 33 |
| 9/46v | area 9/46, ventral part            | Fig. 16 - 33 |
| 10    | area 10                            | Fig. 01 - 09 |
| 11    | area 11                            | Fig. 08 - 20 |
| 12    | area 12                            | Fig. 08 - 26 |
| 13    | area 13                            | Fig. 21 - 26 |
| 14    | area 14                            | Fig. 08 - 26 |
| 23    | area 23                            | Fig. 53 - 84 |
| 24a   | area 24a                           | Fig. 27 - 52 |
| 24b   | area 24b                           | Fig. 25 - 52 |
| 24c   | area 24c                           | Fig. 17 - 34 |
| 24d   | area 24d                           | Fig. 35 - 52 |
| 25    | area 25                            | Fig. 21 - 32 |
| 29/30 | area 29/30                         | Fig. 53 - 76 |
| 31    | area 31                            | Fig. 72 - 81 |
| 32    | area 32                            | Fig. 10 - 26 |
| 44    | area 44                            | Fig. 25 - 41 |
| 45A   | area 45A                           | Fig. 21 - 24 |
| 45B   | area 45B                           | Fig. 25 - 35 |
| 46d   | area 46, dorsal part               | Fig. 03 - 31 |
| 46v   | area 46, ventral part              | Fig. 03 - 31 |
| AIP   | anterior intraparietal area        | Fig. 62 - 68 |
| Core  | core region of the auditory cortex | Fig. 34 - 69 |
| DP    | dorsal prelunate area              | Fig. 88 - 96 |
| ENTO  | entorhinal                         | Fig. 31 - 55 |
| F1    | frontal area F1                    | Fig. 45 - 69 |
| F2    | frontal area F2                    | Fig. 37 - 54 |
| F3    | frontal area F3                    | Fig. 37 - 54 |
| F4    | frontal area F4                    | Fig. 41 - 47 |
| F5    | frontal area F5                    | Fig. 25 - 45 |

## Index of abbreviations

### Areas

|        |                                                   |              |
|--------|---------------------------------------------------|--------------|
| 10     | area 10                                           | Fig. 01 - 09 |
| 46d    | area 46, dorsal part                              | Fig. 03 - 31 |
| 46v    | area 46, ventral part                             | Fig. 03 - 31 |
| 11     | area 11                                           | Fig. 08 - 20 |
| 12     | area 12                                           | Fig. 08 - 26 |
| 14     | area 14                                           | Fig. 08 - 26 |
| 9      | area 9                                            | Fig. 10 - 20 |
| 32     | area 32                                           | Fig. 10 - 26 |
| 9/46d  | area 9/46, dorsal part                            | Fig. 16 - 33 |
| 9/46v  | area 9/46, ventral part                           | Fig. 16 - 33 |
| 24c    | area 24c                                          | Fig. 17 - 34 |
| 8B     | area 8B                                           | Fig. 18 - 40 |
| 45A    | area 45A                                          | Fig. 21 - 24 |
| 13     | area 13                                           | Fig. 21 - 26 |
| 25     | area 25                                           | Fig. 21 - 32 |
| POLE   | temporale pole                                    | Fig. 23 - 33 |
| 45B    | area 45B                                          | Fig. 25 - 35 |
| F6     | frontal area F6                                   | Fig. 25 - 36 |
| F7     | frontal area F7                                   | Fig. 25 - 36 |
| 8r     | rostral part of area 8                            | Fig. 25 - 36 |
| ProM   | area ProM                                         | Fig. 25 - 40 |
| 44     | area 44                                           | Fig. 25 - 41 |
| F5     | frontal area F5                                   | Fig. 25 - 45 |
| 24b    | area 24b                                          | Fig. 25 - 52 |
| OPAI   | orbital periallocortex                            | Fig. 27 - 32 |
| OPRO   | orbital proisocortex                              | Fig. 27 - 32 |
| Gu     | gustatory cortex                                  | Fig. 27 - 33 |
| 8l     | lateral part of area 8                            | Fig. 27 - 40 |
| 8m     | medial part of area 8                             | Fig. 27 - 42 |
| 24a    | area 24a                                          | Fig. 27 - 52 |
| PERI   | perirhinal                                        | Fig. 28 - 52 |
| PIR    | piriform                                          | Fig. 31 - 32 |
| ENTO   | entorhinal                                        | Fig. 31 - 55 |
| STPr   | superior temporal polysensory, rostral part       | Fig. 32 - 50 |
| TEa/ma | area TE of the superior temporal sulcus, ant part | Fig. 32 - 50 |
| TEav   | area TE, anterior-ventral part                    | Fig. 32 - 50 |
| INS    | insula                                            | Fig. 33 - 72 |
| Pi     | parainsula                                        | Fig. 34 - 51 |
| PBr    | parabelt, rostral part                            | Fig. 34 - 54 |
| IPa    | area IPa                                          | Fig. 34 - 61 |
| SII    | secondary somatosensory area                      | Fig. 34 - 62 |
| PGa    | area PGa                                          | Fig. 34 - 69 |
| Core   | core region of the auditory cortex                | Fig. 34 - 69 |
| LB     | lateral belt                                      | Fig. 34 - 73 |
| MB     | medial belt                                       | Fig. 34 - 73 |

|          |                                                    |               |
|----------|----------------------------------------------------|---------------|
| F6       | frontal area F6                                    | Fig. 25 - 36  |
| F7       | frontal area F7                                    | Fig. 25 - 36  |
| FST      | fundus of superior temporal area                   | Fig. 62 - 73  |
| Gu       | gustatory cortex                                   | Fig. 27 - 33  |
| INS      | insula                                             | Fig. 33 - 72  |
| IPa      | area IPa                                           | Fig. 34 - 61  |
| LB       | lateral belt                                       | Fig. 34 - 73  |
| LIP      | lateral intraparietal area                         | Fig. 69 - 91  |
| MB       | medial belt                                        | Fig. 34 - 73  |
| MIP      | medial intraparietal area                          | Fig. 74 - 90  |
| MST      | medial superior temporal area                      | Fig. 70 - 87  |
| MT       | middle temporal area                               | Fig. 74 - 87  |
| OPAI     | orbital periallocortex                             | Fig. 27 - 32  |
| OPRO     | orbital proisocortex                               | Fig. 27 - 32  |
| PBc      | parabelt, caudal part                              | Fig. 55 - 73  |
| PBr      | parabelt, rostral part                             | Fig. 34 - 54  |
| PERI     | perirhinal                                         | Fig. 28 - 52  |
| PGa      | area PGa                                           | Fig. 34 - 69  |
| Pi       | parainsula                                         | Fig. 34 - 51  |
| PIP      | posterior intraparietal area                       | Fig. 82 - 93  |
| PIR      | piriform                                           | Fig. 31 - 32  |
| POLE     | temporale pole                                     | Fig. 23 - 33  |
| Pro. St. | prostriata                                         | Fig. 72 - 80  |
| ProM     | area ProM                                          | Fig. 25 - 40  |
| SII      | secondary somatosensory area                       | Fig. 34 - 62  |
| STPc     | superior temporal polysensory, caudal part         | Fig. 66 - 84  |
| STPi     | superior temporal polysensory, intermediate part   | Fig. 51 - 65  |
| STPr     | superior temporal polysensory, rostral part        | Fig. 32 - 50  |
| SUB      | subiculum                                          | Fig. 47 - 75  |
| TEad     | area TE, anterior-dorsal part                      | Fig. 36 - 50  |
| TEa/ma   | area TE of the superior temporal sulcus, ant part  | Fig. 32 - 50  |
| TEa/mp   | area TE of the superior temporal sulcus, post part | Fig. 51 - 64  |
| TEav     | area TE, anterior-ventral part                     | Fig. 32 - 50  |
| TEpd     | area TE, posterior-dorsal part                     | Fig. 51 - 69  |
| TEpv     | area TE, posterior-ventral part                    | Fig. 51 - 69  |
| TEO      | area TEO                                           | Fig. 65 - 83  |
| TEOm     | area TEO medial part                               | Fig. 65 - 73  |
| TH/TF    | area TH/TF                                         | Fig. 53 - 69  |
| TPt      | temporo-parietal area                              | Fig. 74 - 81  |
| V1       | visual area 1                                      | Fig. 81 - 117 |
| V2       | visual area 2                                      | Fig. 68 - 109 |
| V3       | visual area 3                                      | Fig. 70 - 98  |
| V3A      | visual area 3A                                     | Fig. 85 - 96  |
| V4       | visual area 4                                      | Fig. 70 - 91  |
| V4t      | transitional visual area 4                         | Fig. 74 - 87  |
| VIP      | ventral intraparietal area                         | Fig. 68 - 82  |
| V6       | area V6                                            | Fig. 88 - 98  |
| V6A      | area V6A                                           | Fig. 85 - 96  |



|                 |                                                    |               |
|-----------------|----------------------------------------------------|---------------|
| <b>24d</b>      | area 24d                                           | Fig. 35 - 52  |
| <b>TEad</b>     | area TE, anterior-dorsal part                      | Fig. 36 - 50  |
| <b>F2</b>       | frontal area F2                                    | Fig. 37 - 54  |
| <b>F3</b>       | frontal area F3                                    | Fig. 37 - 54  |
| <b>F4</b>       | frontal area F4                                    | Fig. 41 - 47  |
| <b>3</b>        | somatosensory area 3                               | Fig. 41 - 75  |
| <b>2</b>        | somatosensory area 2                               | Fig. 41 - 83  |
| <b>F1</b>       | frontal area F1                                    | Fig. 45 - 69  |
| <b>SUB</b>      | subiculum                                          | Fig. 47 - 75  |
| <b>TEa/mp</b>   | area TE of the superior temporal sulcus, post part | Fig. 51 - 64  |
| <b>STPi</b>     | superior temporal polysensory, intermediate part   | Fig. 51 - 65  |
| <b>TEpd</b>     | area TE, posterior-dorsal part                     | Fig. 51 - 69  |
| <b>TEpv</b>     | area TE, posterior-ventral part                    | Fig. 51 - 69  |
| <b>1</b>        | somatosensory area 1                               | Fig. 51 - 79  |
| <b>TH/TF</b>    | area TH/TF                                         | Fig. 53 - 69  |
| <b>29/30</b>    | area 29/30                                         | Fig. 53 - 76  |
| <b>23</b>       | area 23                                            | Fig. 53 - 84  |
| <b>PBc</b>      | parabell, caudal part                              | Fig. 55 - 73  |
| <b>AIP</b>      | anterior intraparietal area                        | Fig. 62 - 68  |
| <b>7B</b>       | area 7B                                            | Fig. 62 - 71  |
| <b>FST</b>      | fundus of superior temporal area                   | Fig. 62 - 73  |
| <b>5</b>        | somatosensory area 5                               | Fig. 62 - 92  |
| <b>7op</b>      | area 7op (parietal operculum)                      | Fig. 63 - 76  |
| <b>TEOm</b>     | area TEO medial part                               | Fig. 65 - 73  |
| <b>TEO</b>      | area TEO                                           | Fig. 65 - 83  |
| <b>STPc</b>     | superior temporal polysensory, caudal part         | Fig. 66 - 84  |
| <b>VIP</b>      | ventral intraparietal area                         | Fig. 68 - 82  |
| <b>V2</b>       | visual area 2                                      | Fig. 68 - 109 |
| <b>LIP</b>      | lateral intraparietal area                         | Fig. 69 - 91  |
| <b>MST</b>      | medial superior temporal area                      | Fig. 70 - 87  |
| <b>V4</b>       | visual area 4                                      | Fig. 70 - 91  |
| <b>V3</b>       | visual area 3                                      | Fig. 70 - 98  |
| <b>Pro. St.</b> | prostriata                                         | Fig. 72 - 80  |
| <b>31</b>       | area 31                                            | Fig. 72 - 81  |
| <b>7A</b>       | area 7A                                            | Fig. 72 - 91  |
| <b>7m</b>       | area 7m                                            | Fig. 73 - 90  |
| <b>TPt</b>      | temporo-parietal area                              | Fig. 74 - 81  |
| <b>MT</b>       | middle temporal area                               | Fig. 74 - 87  |
| <b>V4t</b>      | transitional visual area 4                         | Fig. 74 - 87  |
| <b>MIP</b>      | medial intraparietal area                          | Fig. 74 - 90  |
| <b>V1</b>       | visual area 1                                      | Fig. 81 - 117 |
| <b>PIP</b>      | posterior intraparietal area                       | Fig. 82 - 93  |
| <b>V3A</b>      | visual area 3A                                     | Fig. 85 - 96  |
| <b>V6A</b>      | area V6A                                           | Fig. 85 - 96  |
| <b>DP</b>       | dorsal prelunate area                              | Fig. 88 - 96  |
| <b>V6</b>       | area V6                                            | Fig. 88 - 98  |

**cs** central sulcus  
**ots** occipito-temporal sulcus  
**ips** intraparietal sulcus  
**pmts** posterior middle temporal sulcus  
**cas** calcarine sulcus  
**ios** inferior occipital sulcus  
**lus** lunate sulcus  
**col** collateral sulcus  
**pos** parieto-occipital sulcus

| Page # | Slice # | Distance between slices | Page # | Slice # | Distance between slices |
|--------|---------|-------------------------|--------|---------|-------------------------|
| 1      | 468     | 480                     | 59     | 236     | 480                     |
| 2      | 464     | 480                     | 60     | 232     | 480                     |
| 3      | 460     | 480                     | 61     | 228     | 480                     |
| 4      | 456     | 480                     | 62     | 224     | 480                     |
| 5      | 452     | 480                     | 63     | 220     | 480                     |
| 6      | 448     | 480                     | 64     | 216     | 480                     |
| 7      | 444     | 480                     | 65     | 212     | 480                     |
| 8      | 440     | 480                     | 66     | 208     | 480                     |
| 9      | 436     | 480                     | 67     | 204     | 480                     |
| 10     | 432     | 480                     | 68     | 200     | 480                     |
| 11     | 428     | 480                     | 69     | 196     | 480                     |
| 12     | 424     | 480                     | 70     | 192     | 480                     |
| 13     | 420     | 480                     | 71     | 188     | 480                     |
| 14     | 416     | 480                     | 72     | 184     | 480                     |
| 15     | 413     | 360                     | 73     | 180     | 480                     |
| 16     | 408     | 600                     | 74     | 176     | 480                     |
| 17     | 404     | 480                     | 75     | 172     | 480                     |
| 18     | 400     | 480                     | 76     | 168     | 480                     |
| 19     | 395     | 600                     | 77     | 164     | 480                     |
| 20     | 392     | 360                     | 78     | 160     | 480                     |
| 21     | 387     | 600                     | 79     | 156     | 480                     |
| 22     | 384     | 360                     | 80     | 152     | 480                     |
| 23     | 380     | 480                     | 81     | 148     | 480                     |
| 24     | 376     | 480                     | 82     | 144     | 480                     |
| 25     | 372     | 480                     | 83     | 140     | 480                     |
| 26     | 368     | 480                     | 84     | 136     | 480                     |
| 27     | 364     | 480                     | 85     | 132     | 480                     |
| 28     | 360     | 480                     | 86     | 128     | 480                     |
| 29     | 356     | 480                     | 87     | 124     | 480                     |
| 30     | 352     | 480                     | 88     | 120     | 480                     |
| 31     | 349     | 360                     | 89     | 116     | 480                     |
| 32     | 344     | 600                     | 90     | 112     | 480                     |
| 33     | 340     | 480                     | 91     | 108     | 480                     |
| 34     | 336     | 480                     | 92     | 104     | 480                     |
| 35     | 332     | 480                     | 93     | 100     | 480                     |
| 36     | 328     | 480                     | 94     | 96      | 480                     |
| 37     | 324     | 480                     | 95     | 92      | 480                     |
| 38     | 320     | 480                     | 96     | 88      | 480                     |
| 39     | 316     | 480                     | 97     | 84      | 480                     |
| 40     | 312     | 480                     | 98     | 80      | 480                     |
| 41     | 308     | 480                     | 99     | 76      | 480                     |
| 42     | 304     | 480                     | 100    | 72      | 480                     |
| 43     | 300     | 480                     | 101    | 68      | 480                     |
| 44     | 296     | 480                     | 102    | 64      | 480                     |
| 45     | 292     | 480                     | 103    | 60      | 480                     |
| 46     | 288     | 480                     | 104    | 56      | 480                     |
| 47     | 284     | 480                     | 105    | 52      | 480                     |
| 48     | 280     | 480                     | 106    | 48      | 480                     |
| 49     | 276     | 480                     | 107    | 44      | 480                     |
| 50     | 272     | 480                     | 108    | 40      | 480                     |
| 51     | 268     | 480                     | 109    | 36      | 480                     |
| 52     | 264     | 480                     | 110    | 32      | 480                     |
| 53     | 260     | 480                     | 111    | 28      | 480                     |
| 54     | 256     | 480                     | 112    | 24      | 480                     |
| 55     | 252     | 480                     | 113    | 20      | 480                     |
| 56     | 248     | 480                     | 114    | 16      | 480                     |
| 57     | 244     | 480                     | 115    | 12      | 480                     |
| 58     | 240     | 480                     | 116    | 8       | 480                     |
|        |         |                         | 117    | 4       | 480                     |

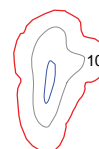

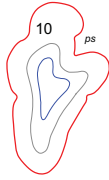

4000 μm

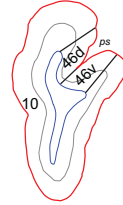

4000 μm

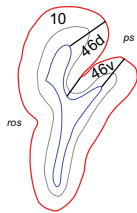

4000 μm

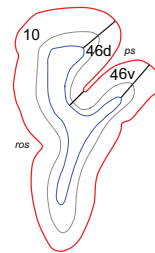

4000 μm

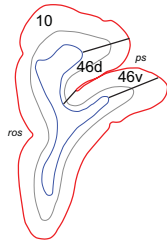

4000 μm

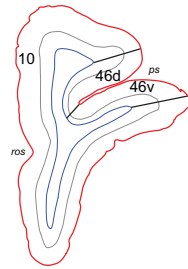

4000 μm

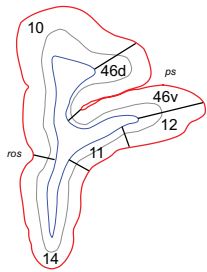

4000 μm

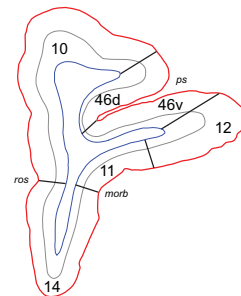

4000 μm

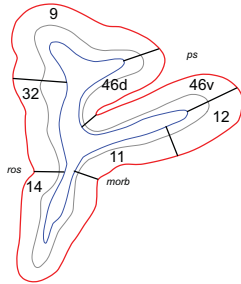

4000 μm

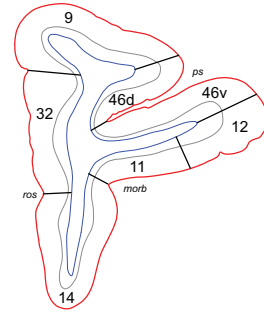

4000 μm

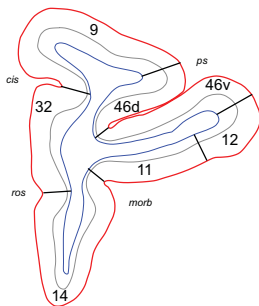

4000 μm

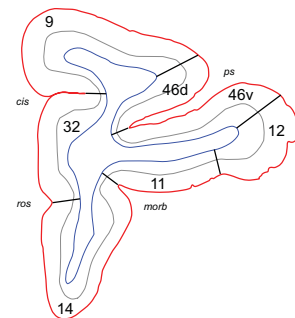

4000 μm

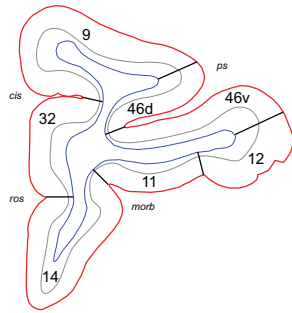

4000 μm

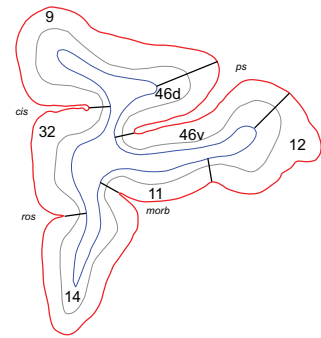

4000 μm

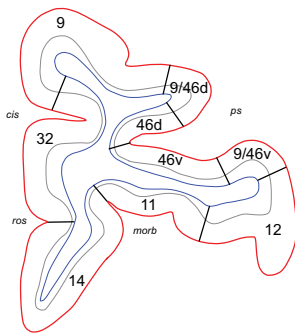

4000 μm

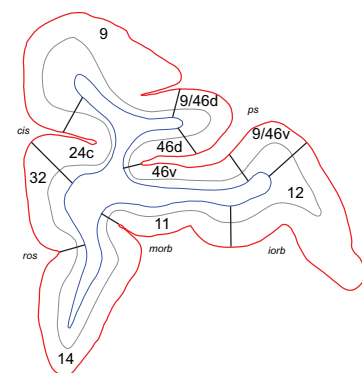

4000 μm

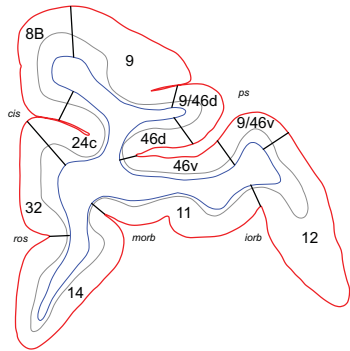

4000 μm

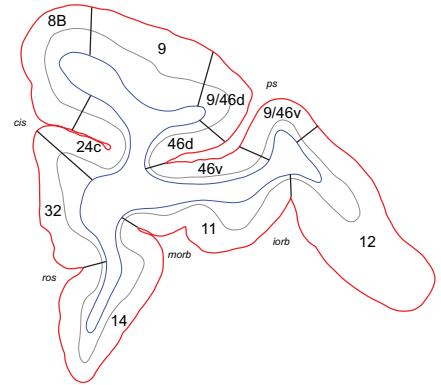

4000 μm

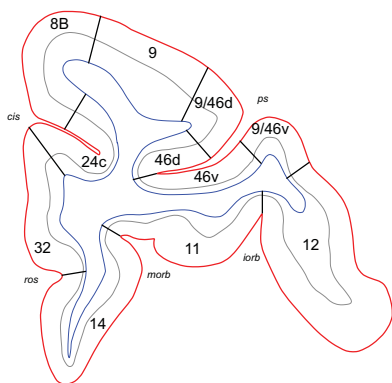

4000 μm

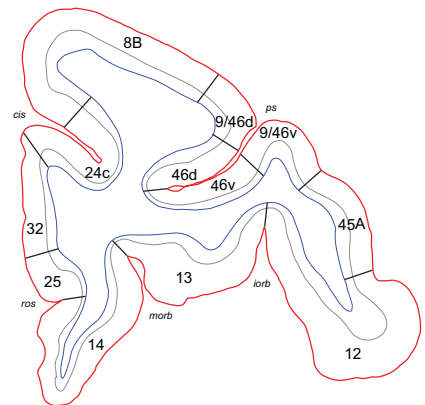

4000 μm

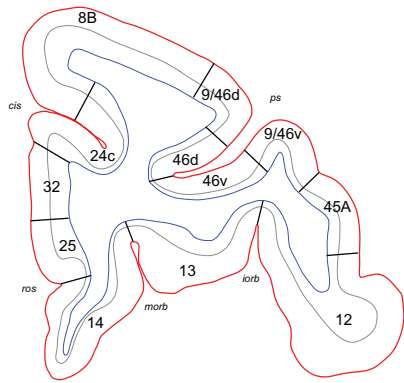

4000  $\mu$ m

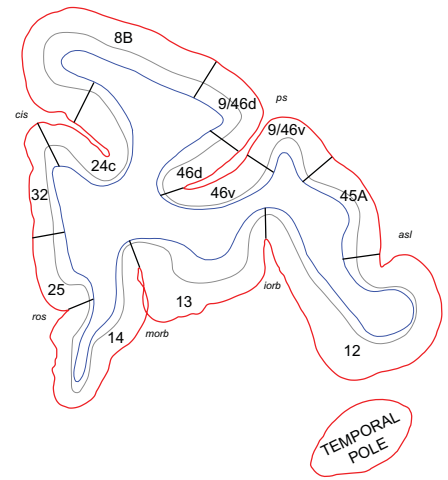

4000  $\mu$ m

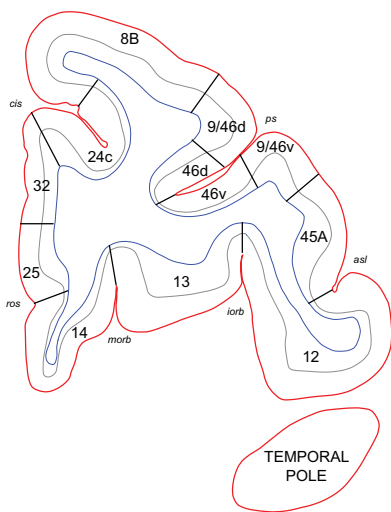

4000  $\mu$ m

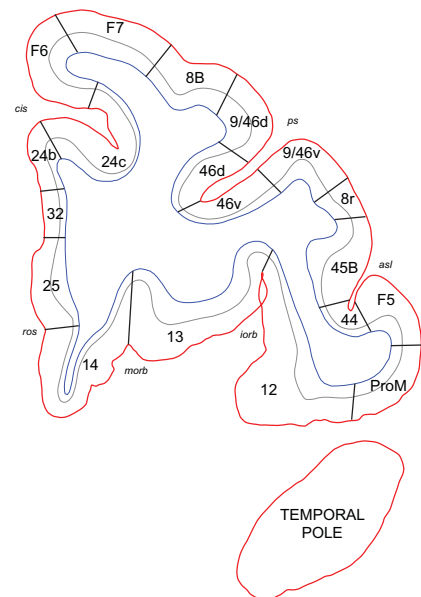

4000  $\mu$ m



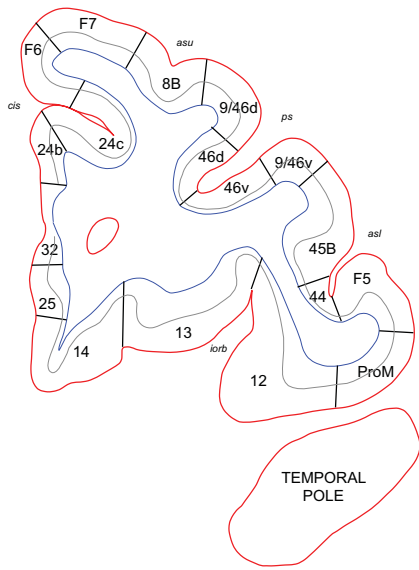

4000 μm

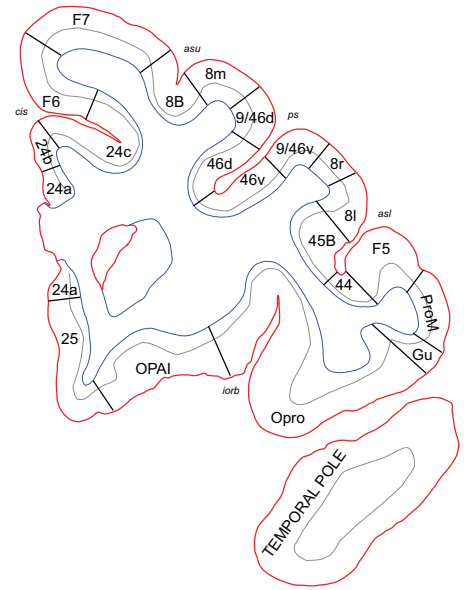

4000 μm

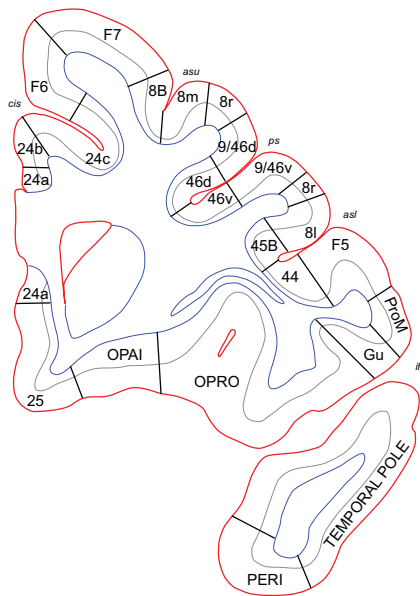

4000 μm

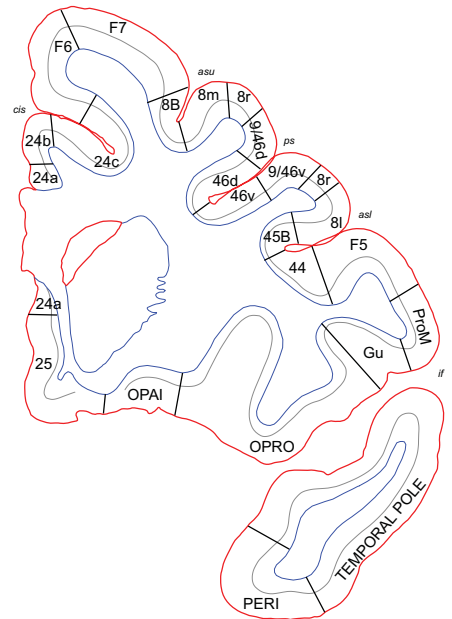

4000 μm

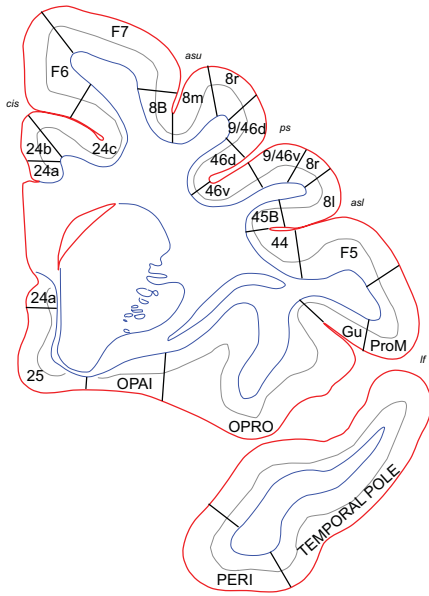

4000 μm

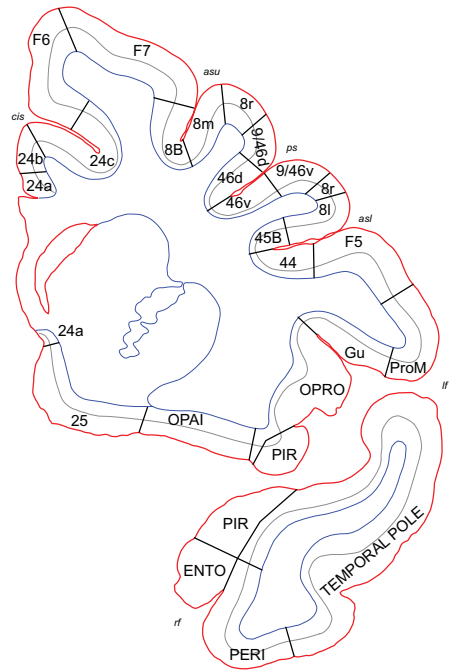

4000 μm

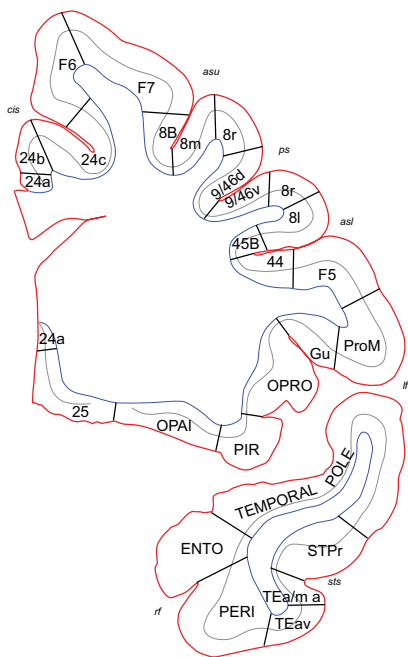

4000 μm

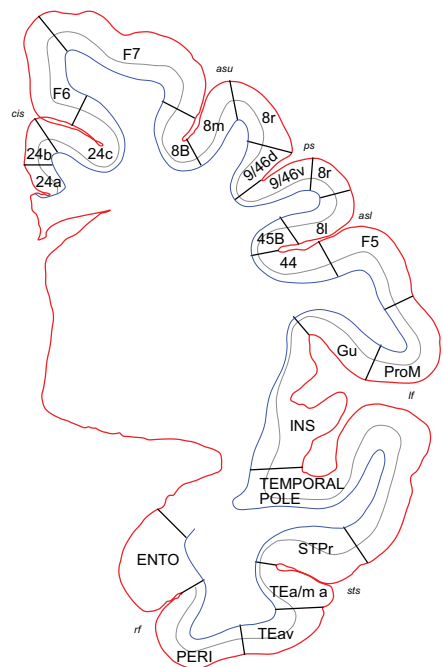

4000 μm

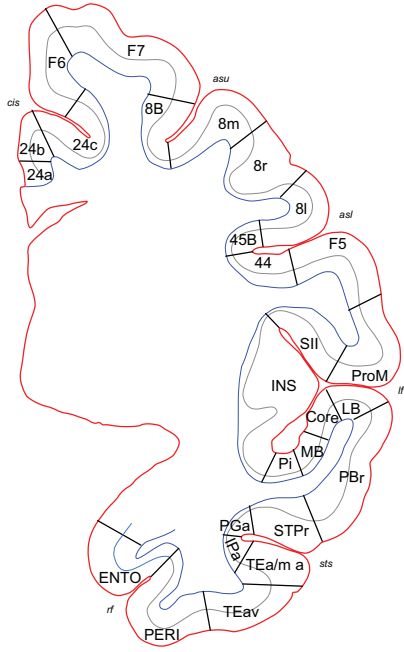

4000 μm

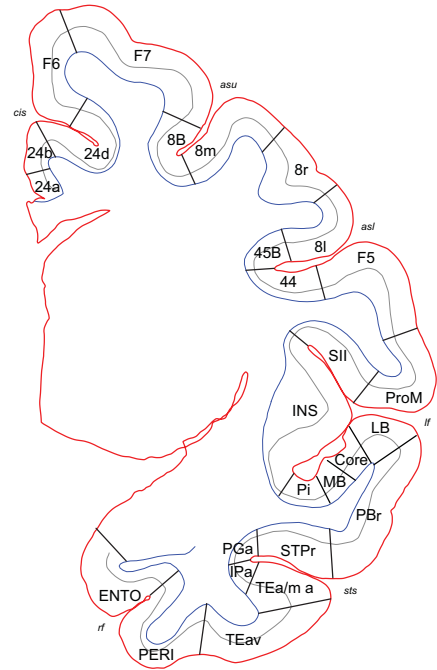

4000 μm

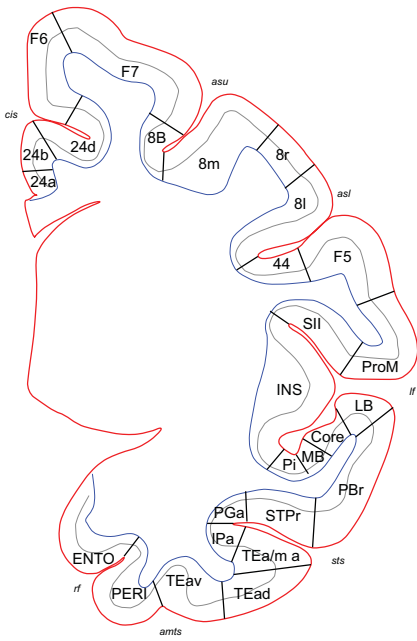

4000 μm

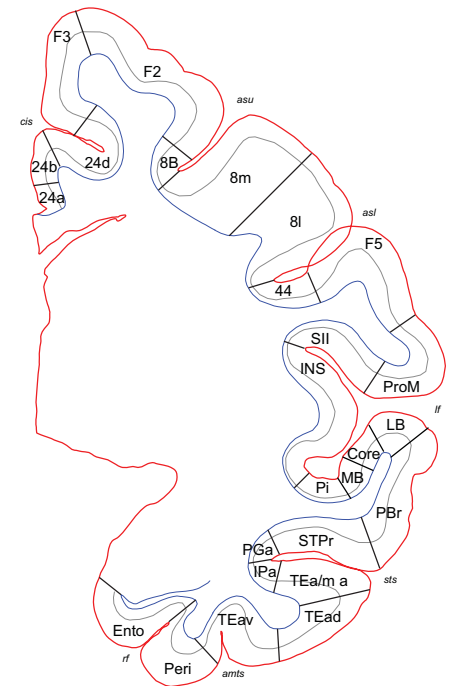

4000 μm

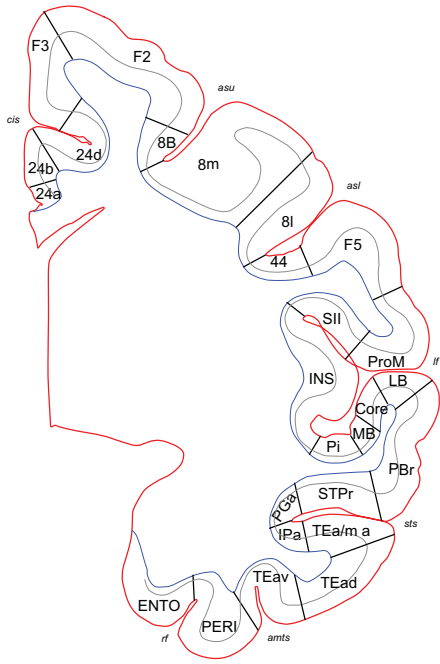

4000 μm

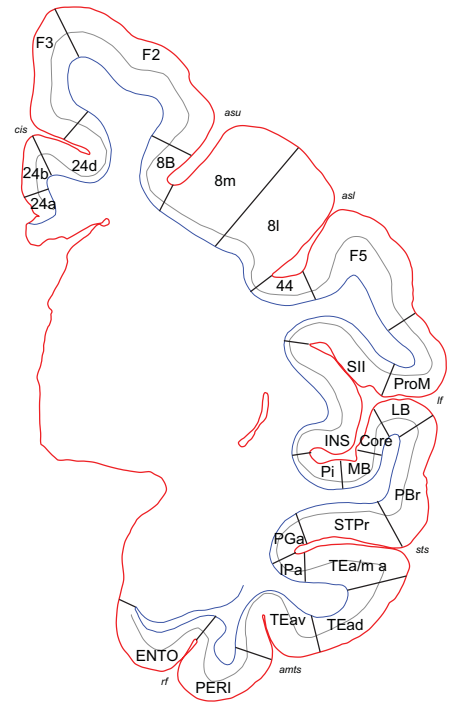

4000 μm

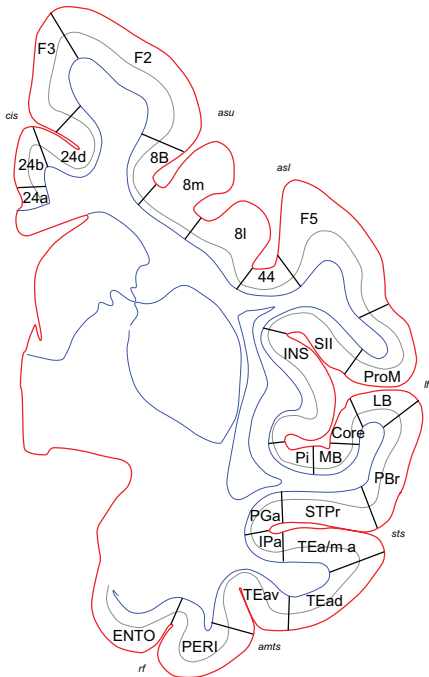

4000 μm

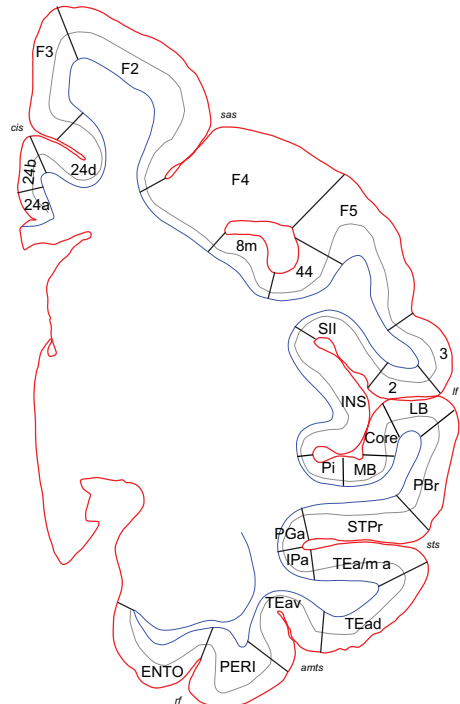

4000 μm

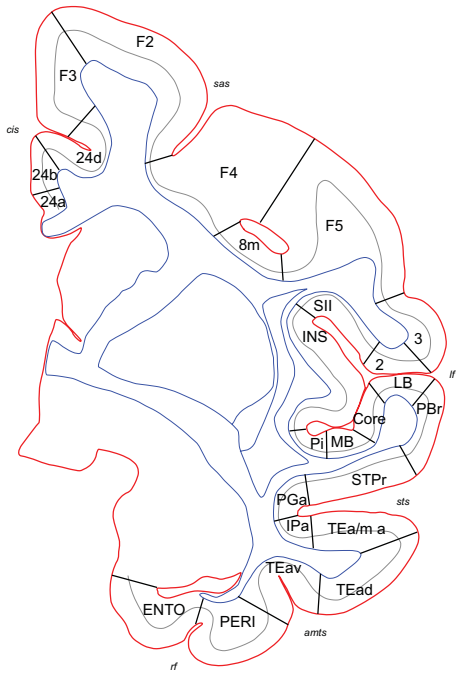

4000 μm

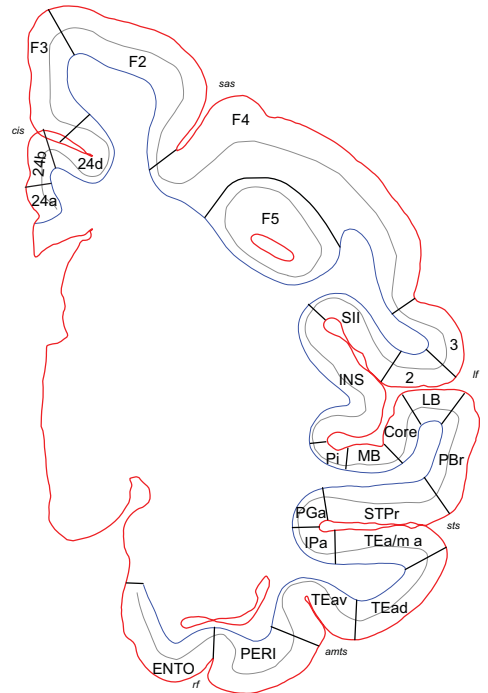

4000 μm

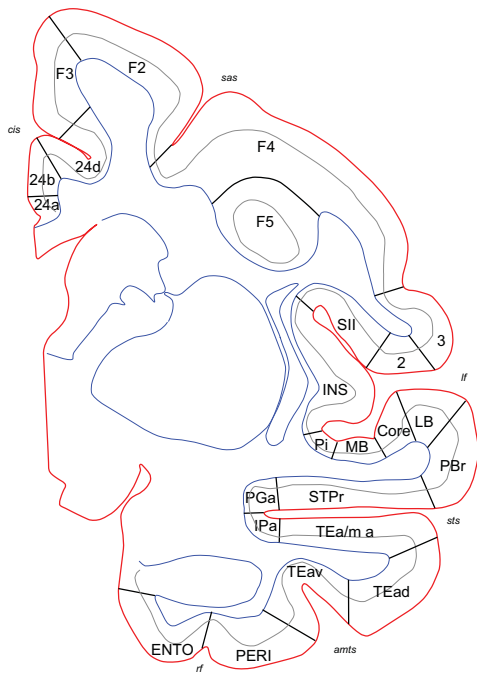

4000 μm

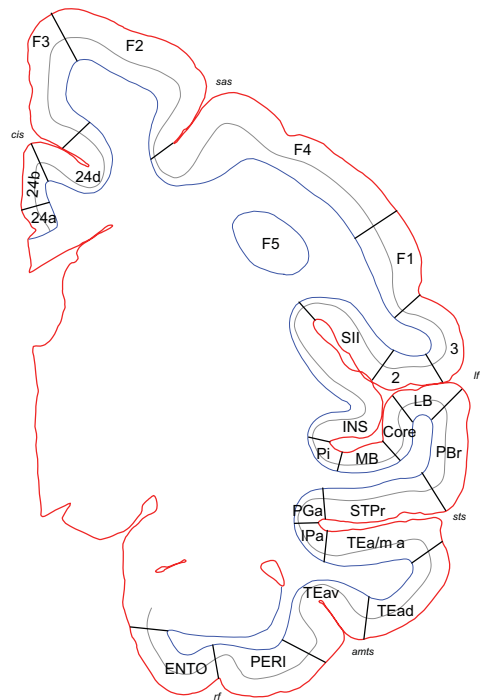

4000 μm

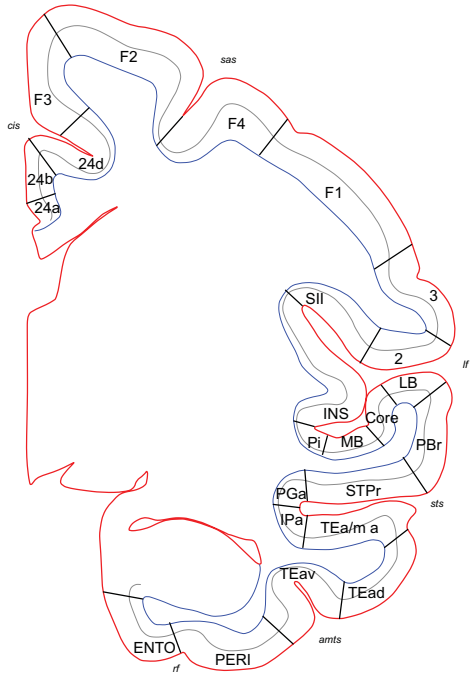

4000 μm

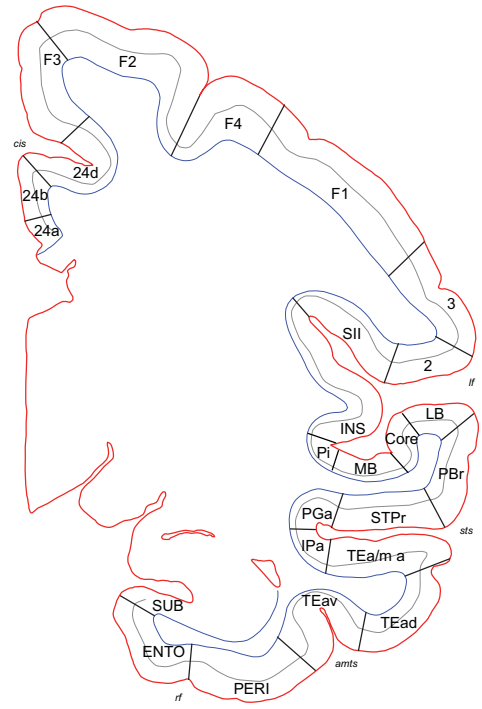

4000 μm

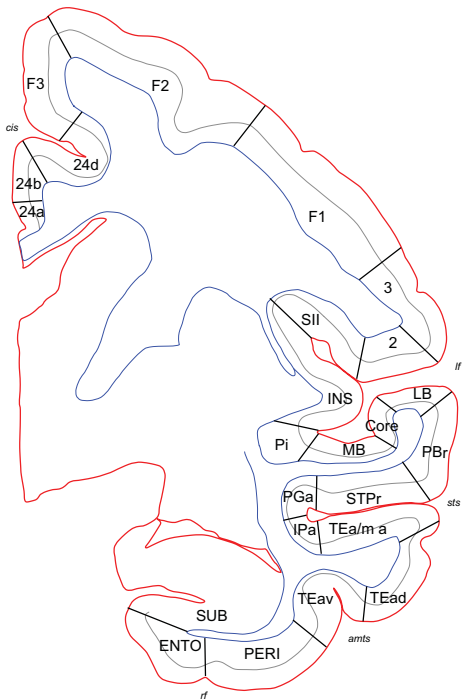

4000 μm

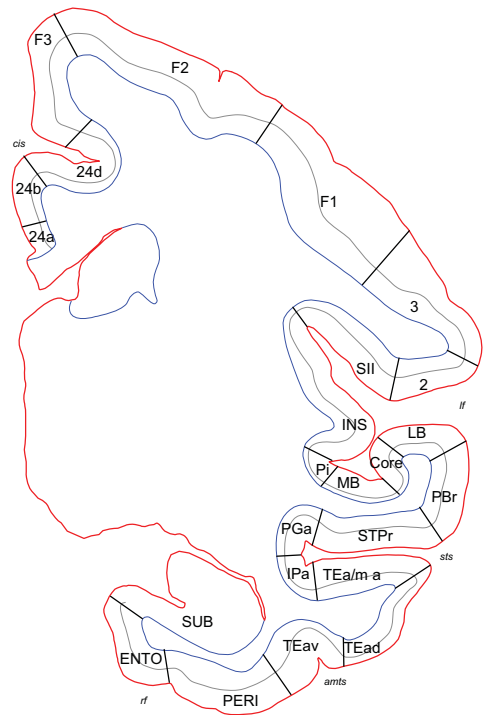

4000 μm

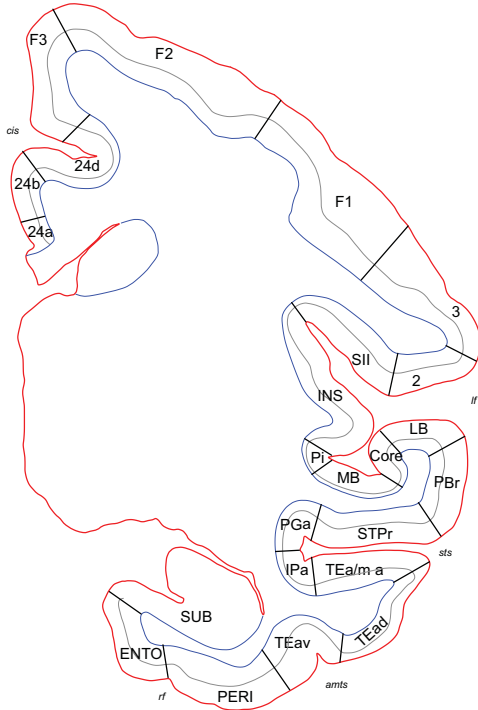

4000 μm

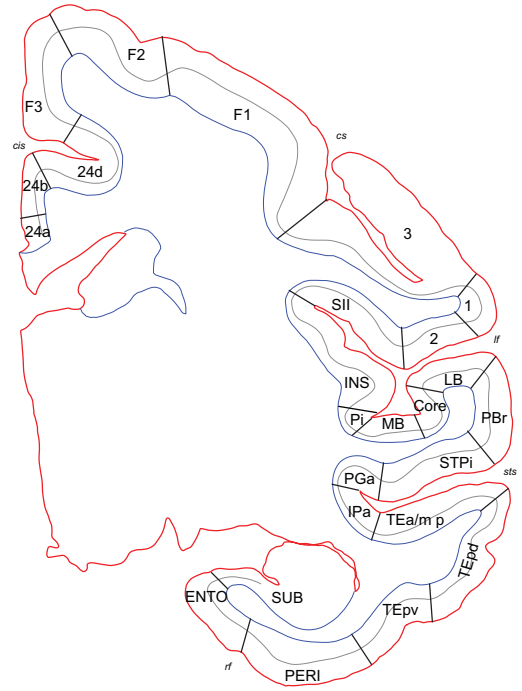

4000 μm

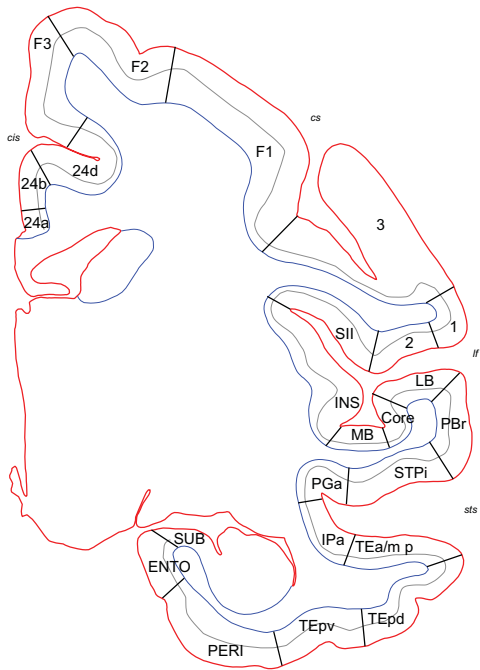

4000 μm

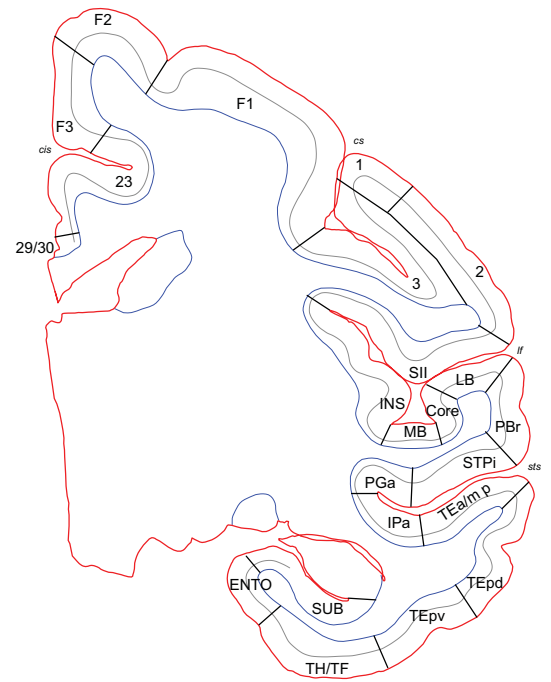

4000 μm



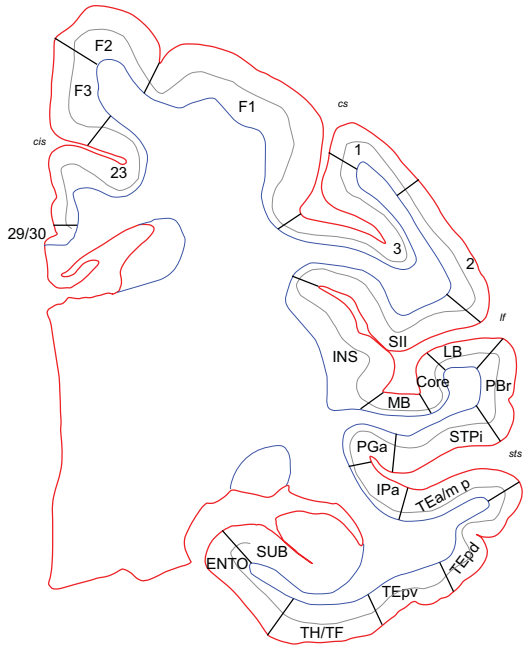

4000 μm

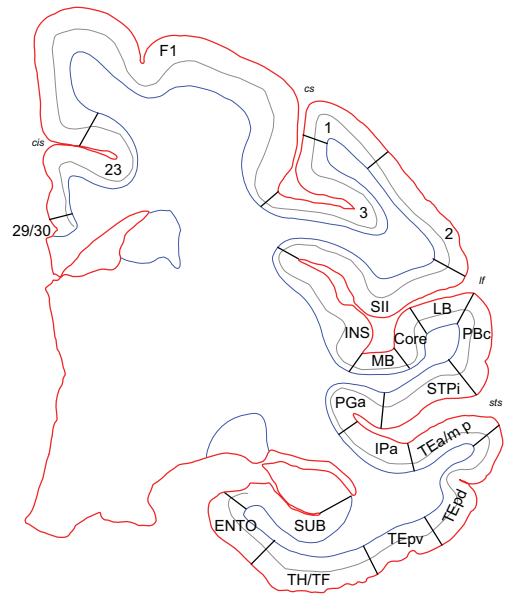

4000 μm

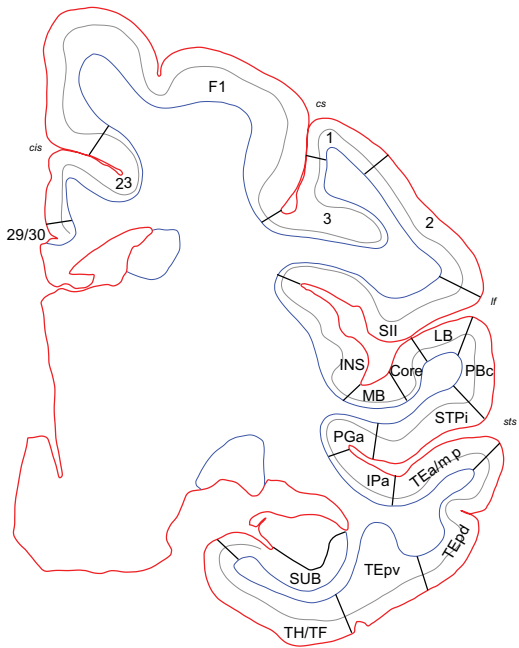

4000 μm

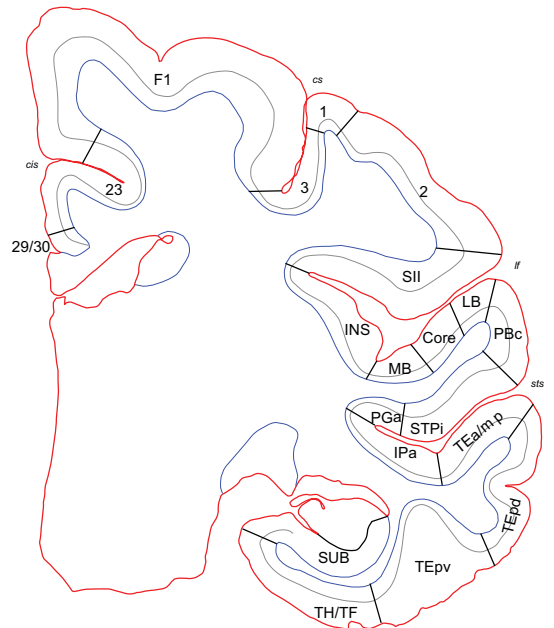

4000 μm

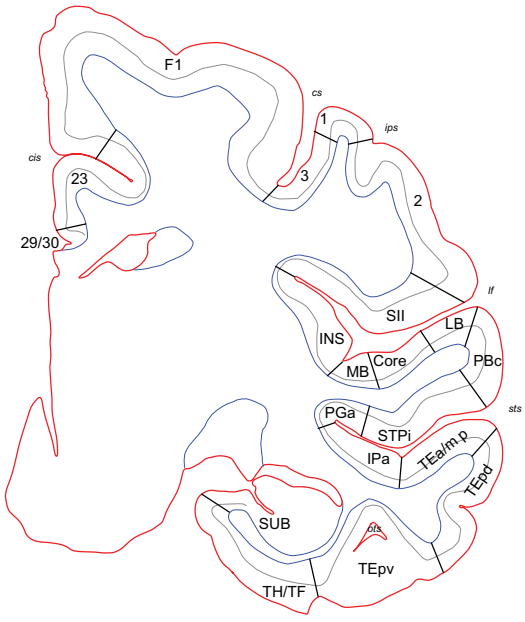

4000  $\mu$ m

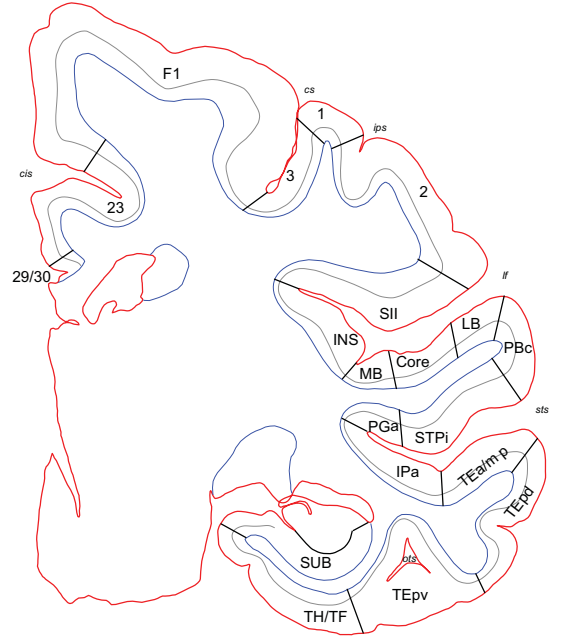

4000  $\mu$ m

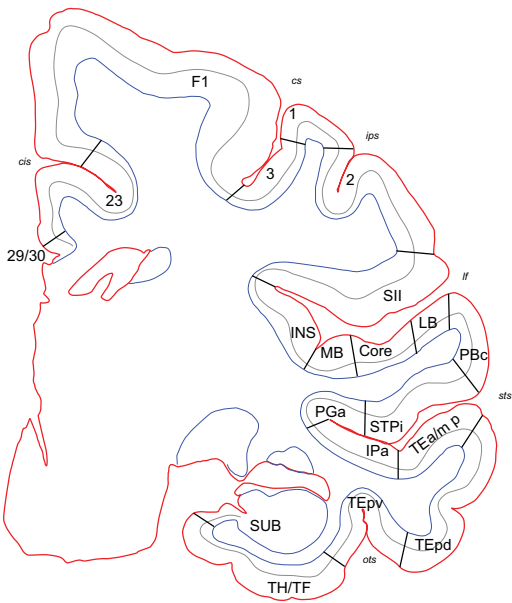

4000  $\mu$ m

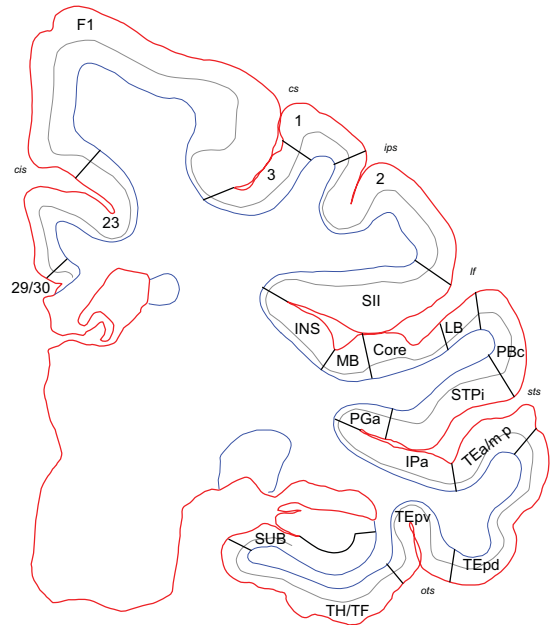

4000  $\mu$ m

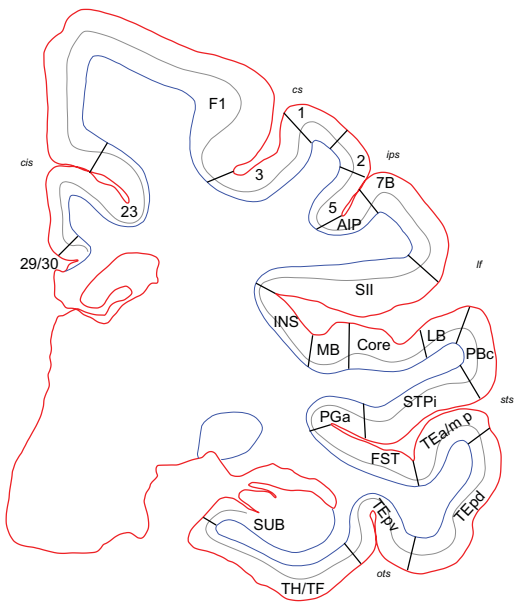

4000 μm

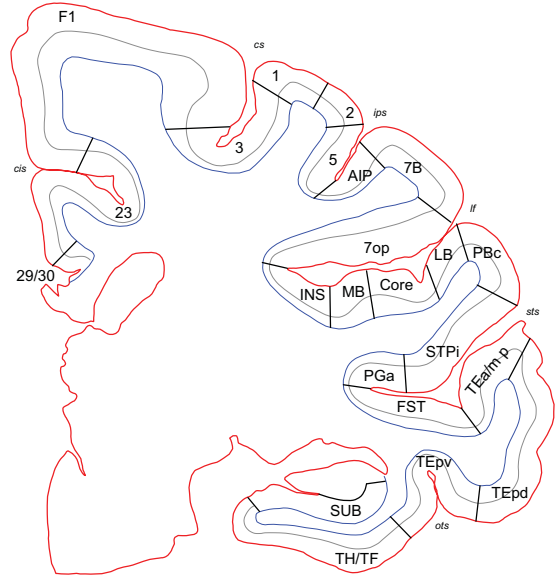

4000 μm

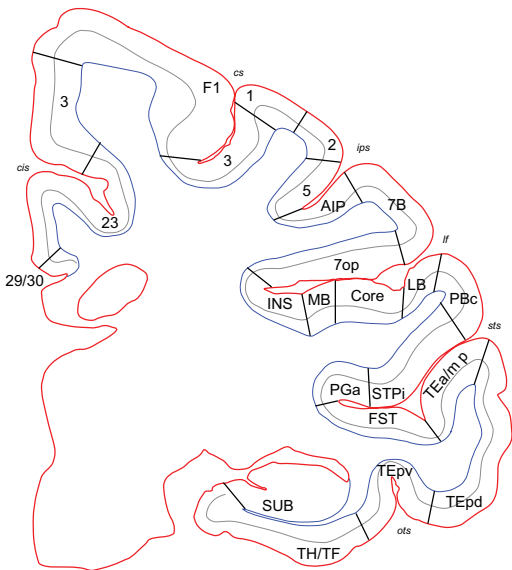

4000 μm

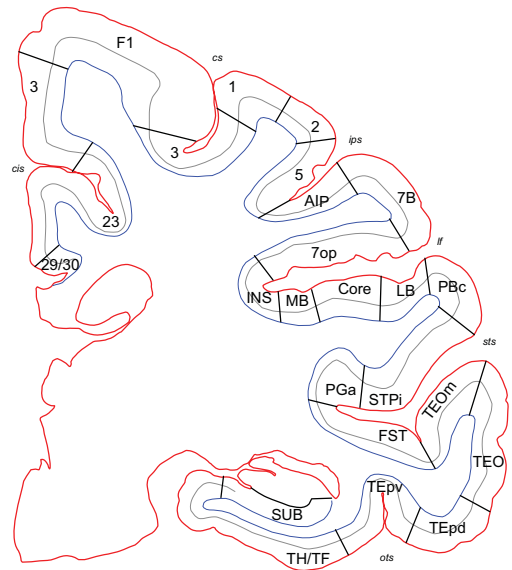

4000 μm

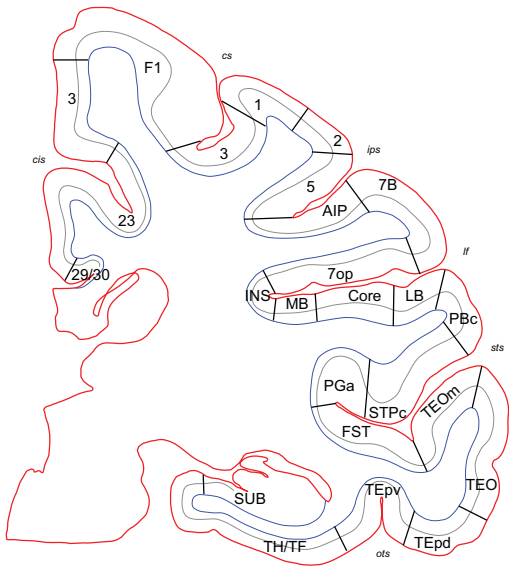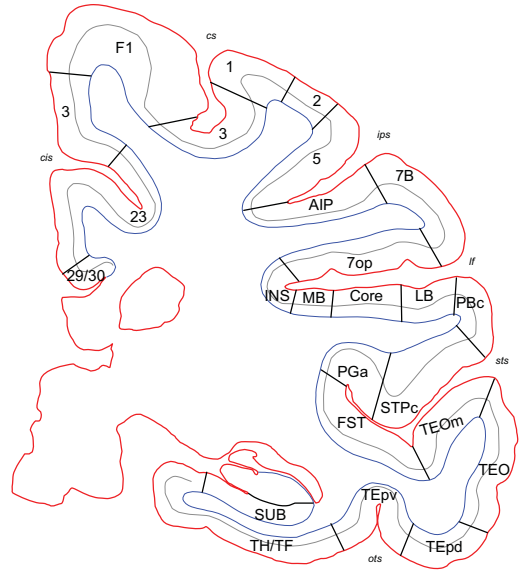

4000 μm

4000 μm

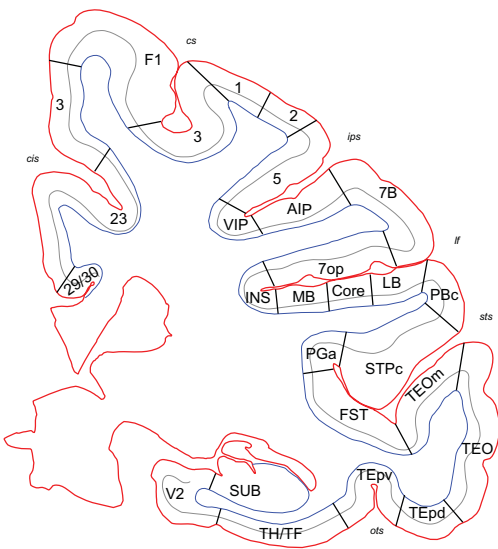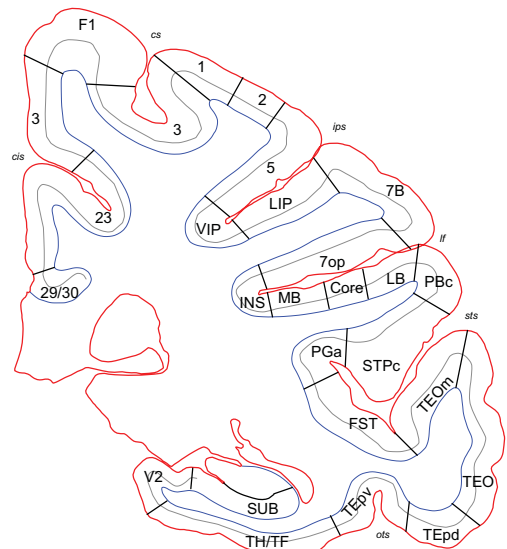

4000 μm

4000 μm

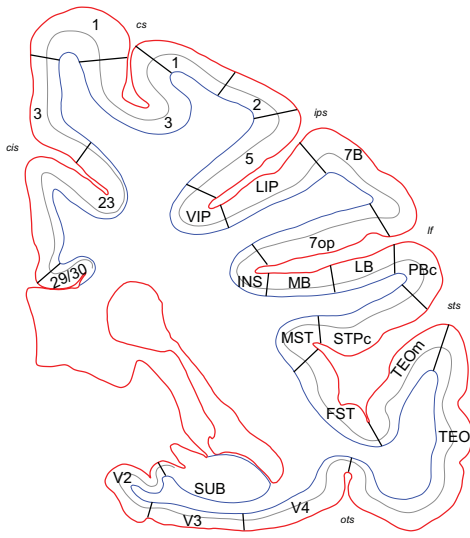

4000  $\mu$ m

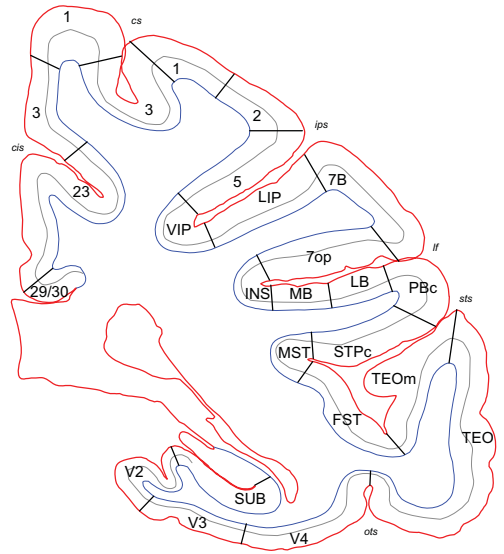

4000  $\mu$ m

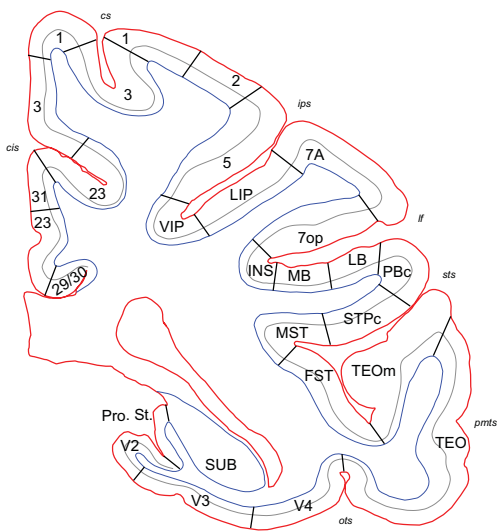

4000  $\mu$ m

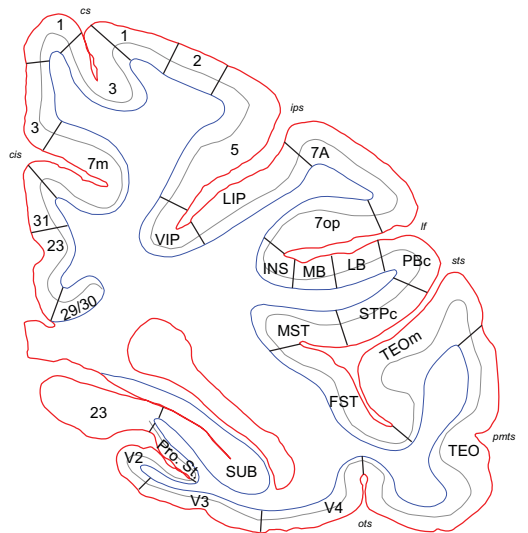

4000  $\mu$ m

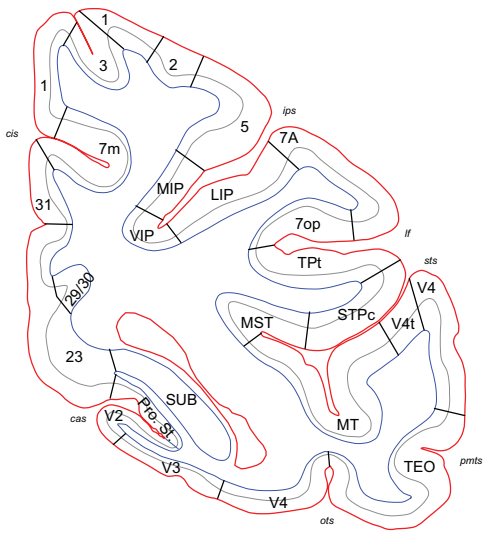

4000  $\mu$ m

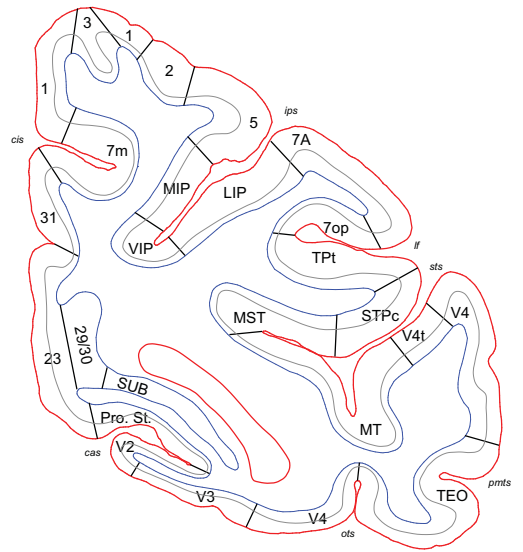

4000  $\mu$ m

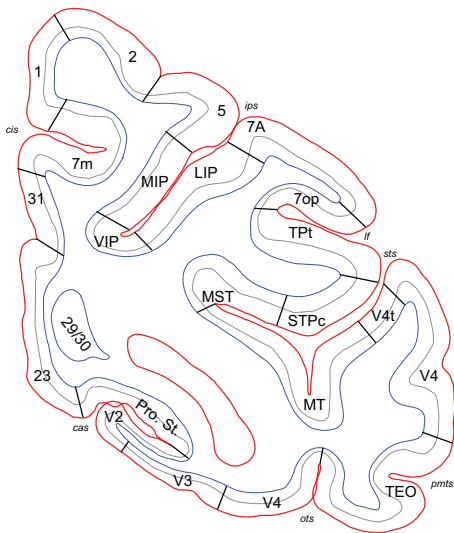

4000  $\mu$ m

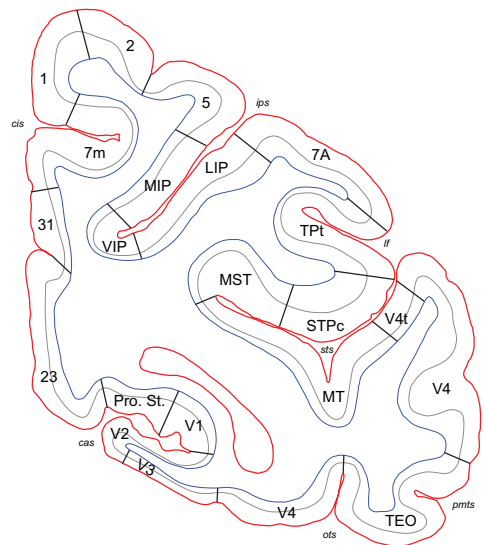

4000  $\mu$ m

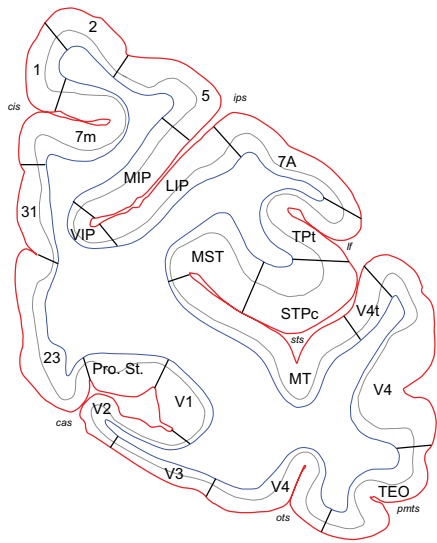

4000  $\mu$ m

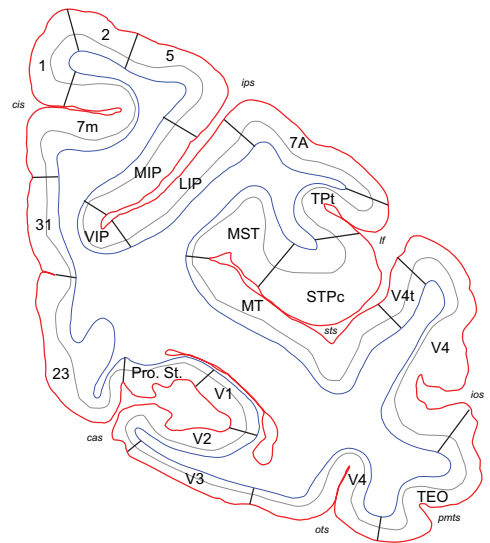

4000  $\mu$ m

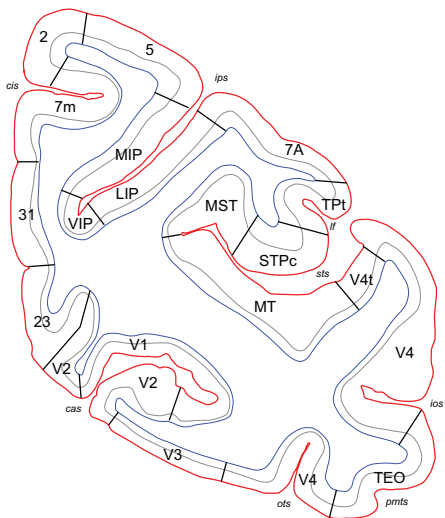

4000  $\mu$ m

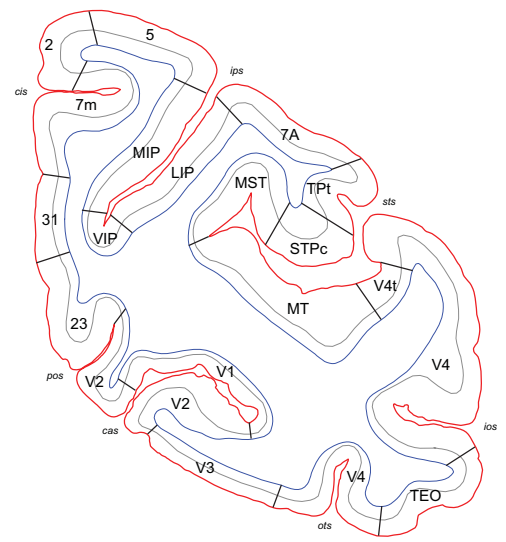

4000  $\mu$ m



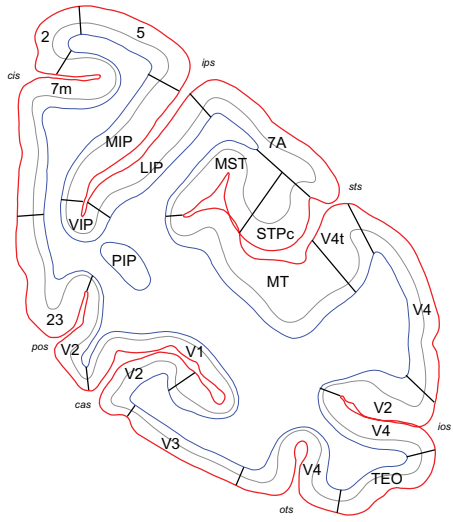

4000  $\mu$ m

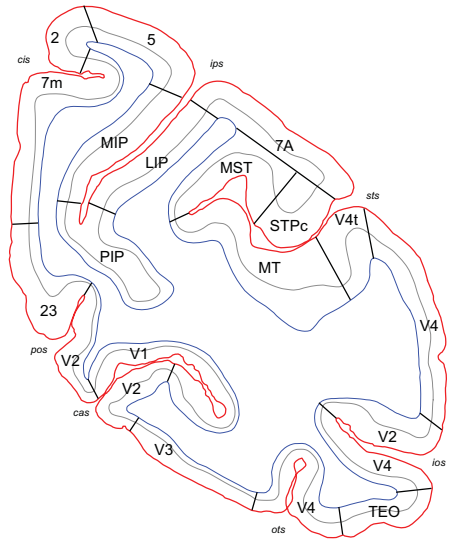

4000  $\mu$ m

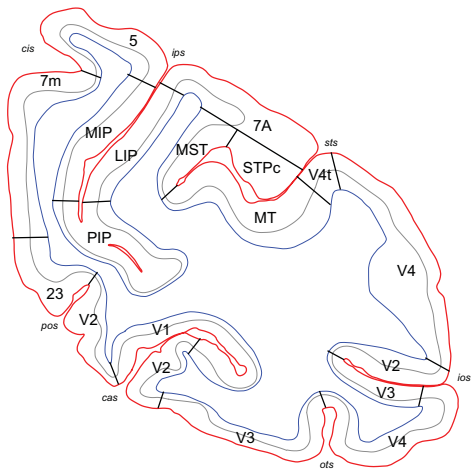

4000  $\mu$ m

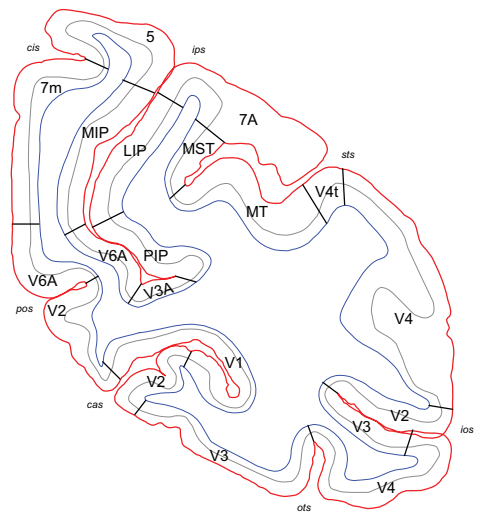

4000  $\mu$ m

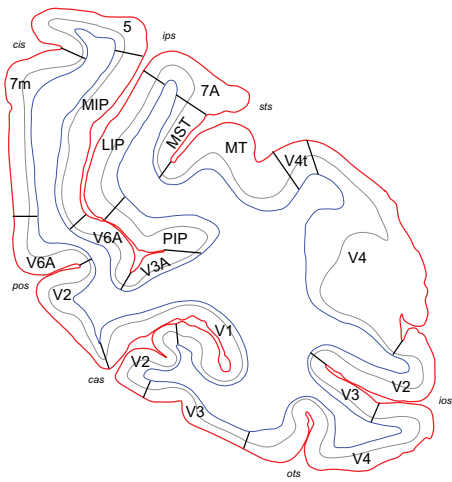

4000 μm

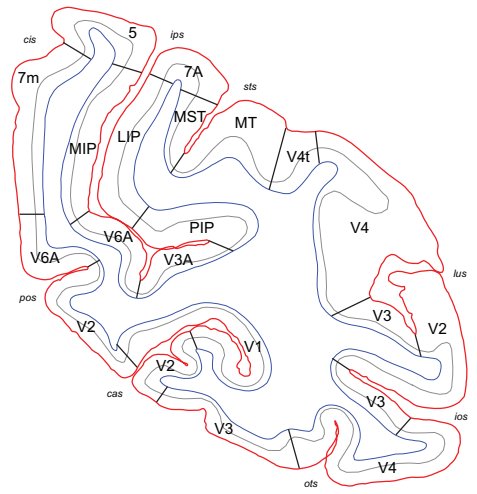

4000 μm

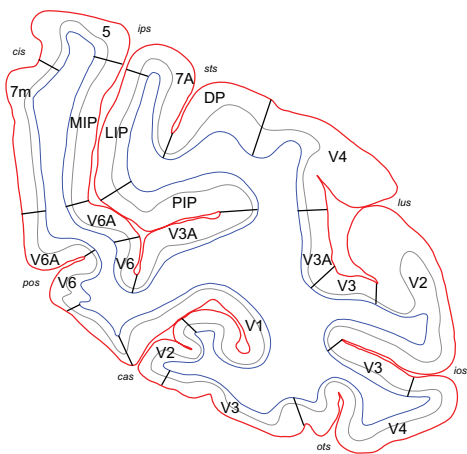

4000 μm

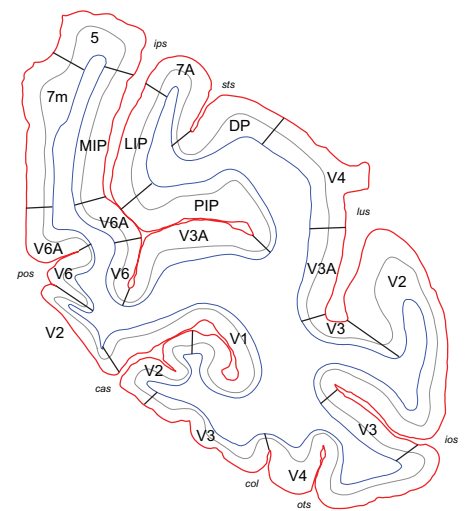

4000 μm

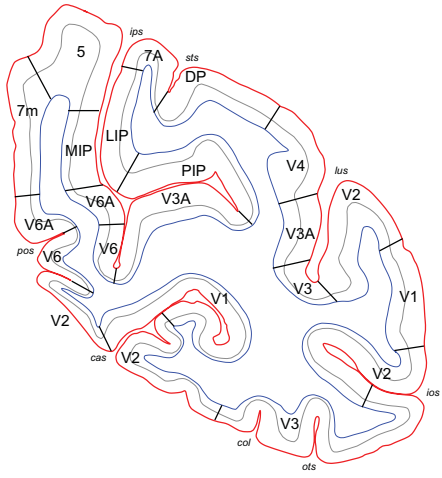

4000 μm

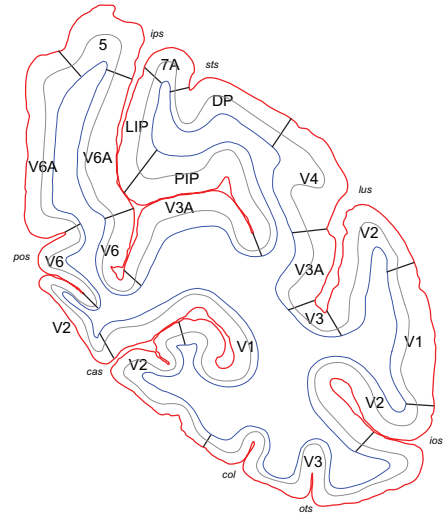

4000 μm

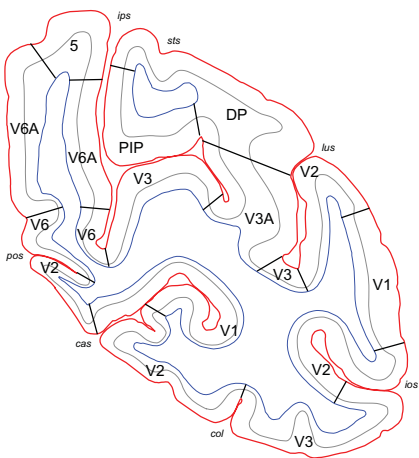

4000 μm

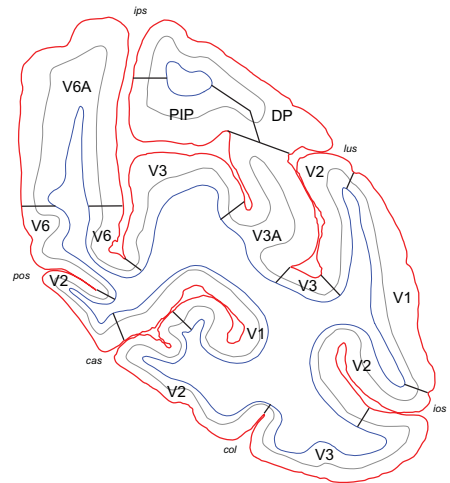

4000 μm

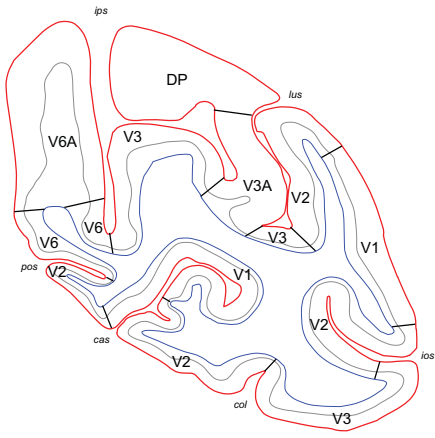

4000 μm

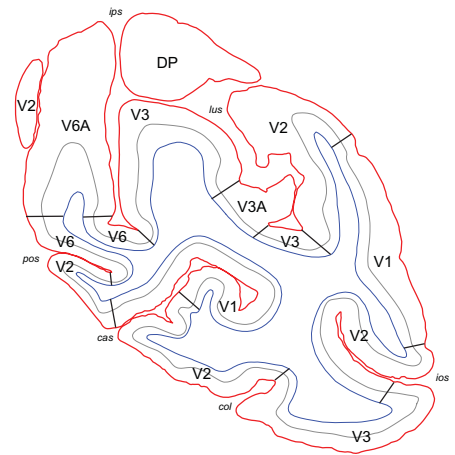

4000 μm

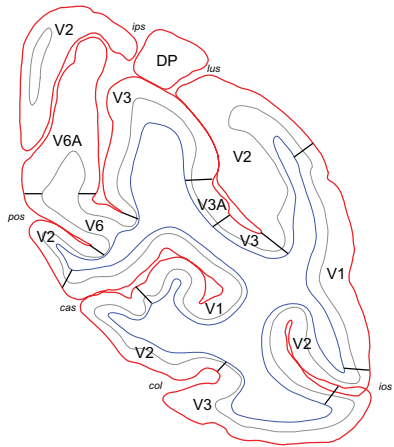

4000 μm

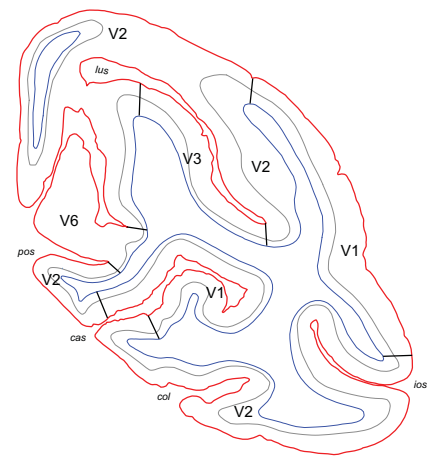

4000 μm

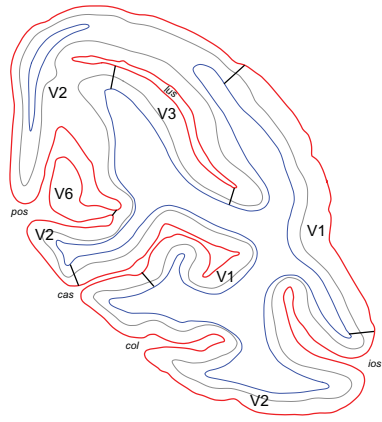

4000  $\mu$ m

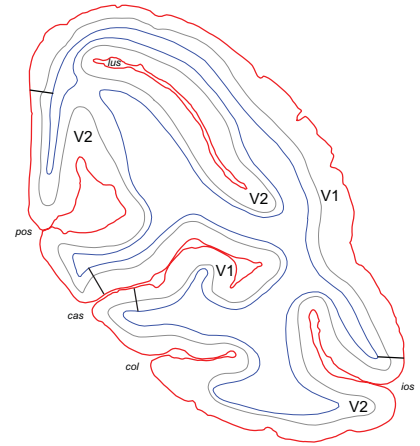

4000  $\mu$ m

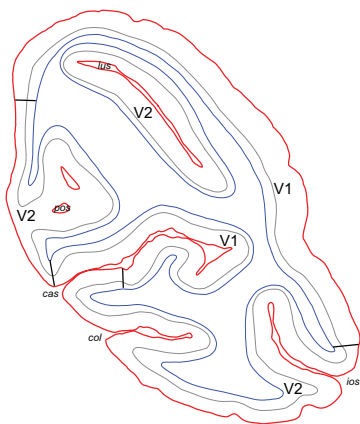

4000  $\mu$ m

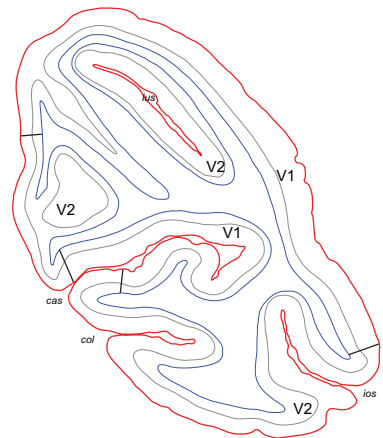

4000  $\mu$ m

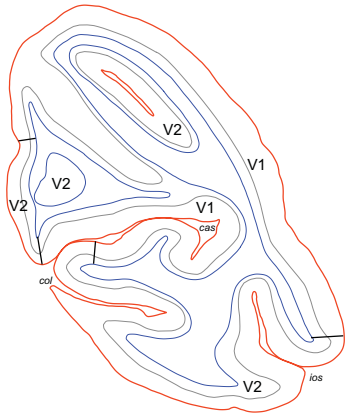

4000 μm

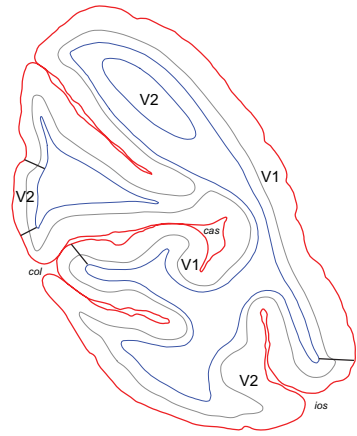

4000 μm

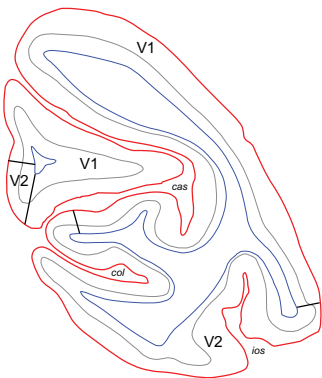

4000 μm

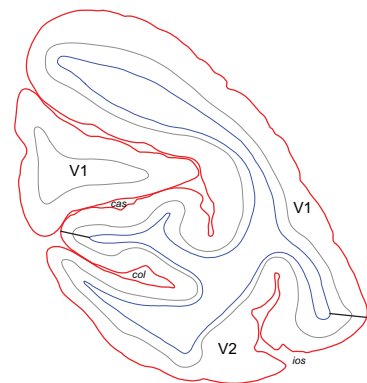

4000 μm

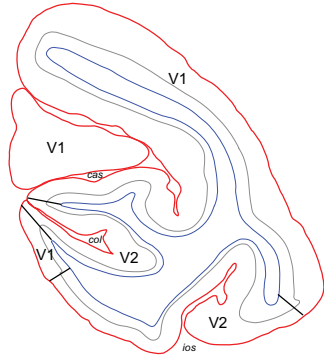

4000 μm

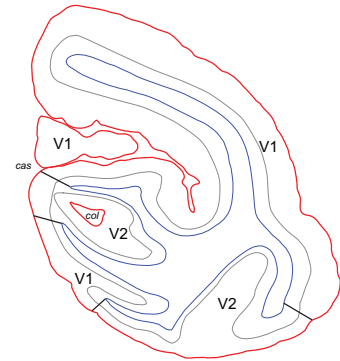

4000 μm

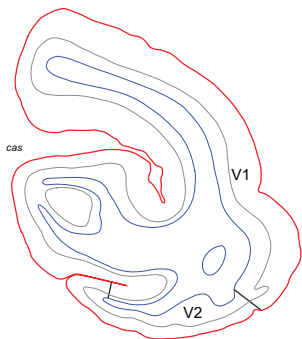

4000 μm

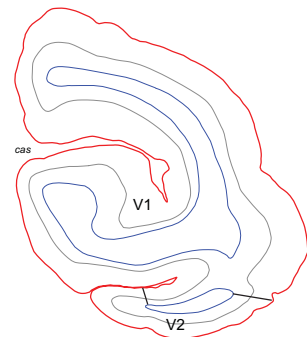

4000 μm



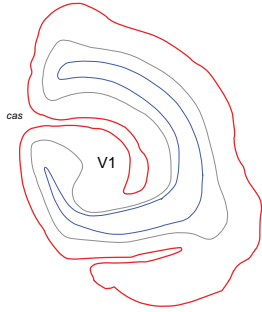

4000 μm

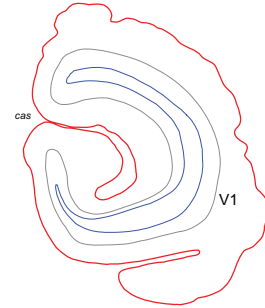

4000 μm

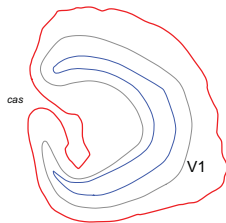

4000 μm

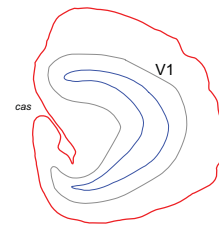

4000 μm

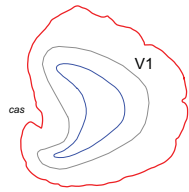

4000 μm

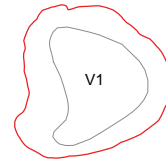

4000 μm

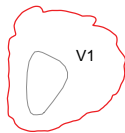

4000 μm

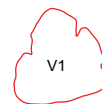

4000 μm
